# Supplementary material
Source: MDPI journal article supplement (https://www.mdpi.com/2673-4389/3/3/25)
Supplement: s1 [file s1]

Archive with 2 entries (2 files):
- 20230611_Supplementary_material.xlsx
- Khare et al Supplementary material.pdf
