# Supplementary material
Source: MDPI journal article supplement (https://www.mdpi.com/2673-4389/3/3/25)
Supplement: s1 [file s1 › 20230611_Supplementary_material.xlsx]

## Sheet: 15d
symbol	baseMean	log2FoldChange	lfcSE	stat	pvalue	padj
Rpl30	794.57	2.98426	0.170484	17.5047	1.32023e-68	2.07527e-64
LOC103690108	516.237	-2.57353	0.167691	-15.3468	3.71905e-53	2.92299e-49
AC134224.3	2409.55	3.52269	0.247548	14.2303	5.94336e-46	3.11412e-42
RT1-CE4	760.128	2.00685	0.141301	14.2027	8.81623e-46	3.46456e-42
RT1-A2	1253.51	2.29144	0.177696	12.8953	4.78589e-38	1.50459e-34
Lig4	200.367	1.84879	0.163873	11.2819	1.61245e-29	4.22436e-26
Clec2l	76.6224	-3.06689	0.289057	-10.61	2.67762e-26	5.26118e-23
RT1-Bb	745.639	-3.22937	0.304214	-10.6154	2.52599e-26	5.26118e-23
Pcdha6	95.1943	3.53311	0.348849	10.1279	4.15472e-24	7.25645e-21
LOC100360791	3679.89	-1.64409	0.163715	-10.0424	9.92395e-24	1.55995e-20
AABR07044362.1	126.621	-4.58627	0.467365	-9.81302	9.89579e-23	1.41411e-19
Nptx2	139.193	4.44664	0.458826	9.69133	3.28214e-22	4.29932e-19
RT1-CE1	106.785	2.55252	0.270555	9.43438	3.93295e-21	4.75554e-18
Agxt2	3454.54	1.54954	0.168207	9.21209	3.19834e-20	3.59105e-17
LOC690045	56.7375	-4.38166	0.489657	-8.94842	3.606e-19	3.77885e-16
Lyc2	212.812	-4.05752	0.454988	-8.91787	4.7533e-19	4.66982e-16
Bphl	789.65	1.44061	0.161666	8.91106	5.05462e-19	4.67374e-16
Oca2	56.8683	3.44995	0.390304	8.83914	9.64591e-19	8.42356e-16
AABR07044383.1	106.491	-2.78469	0.315986	-8.8127	1.22167e-18	1.01071e-15
Fam111a	1397.35	-3.55099	0.419397	-8.4669	2.52018e-17	1.98073e-14
Abhd3	101.761	5.44814	0.681615	7.99299	1.31708e-15	9.85866e-13
Krt10	485.327	-1.46001	0.18595	-7.85166	4.10579e-15	2.93359e-12
Resp18	51.1149	3.109	0.397946	7.81261	5.60171e-15	3.82841e-12
Mtmr1	564.951	-0.832227	0.107539	-7.73883	1.00336e-14	6.57156e-12
C1r	14109.4	-0.803931	0.106785	-7.52849	5.1331e-14	3.22749e-11
RT1-CE10	703.917	2.01744	0.27046	7.4593	8.69847e-14	5.2589e-11
Cyp2a3	16434.7	-1.44123	0.196221	-7.34492	2.05883e-13	1.19862e-10
Ms4a18	57.1691	-3.64565	0.500846	-7.27898	3.36341e-13	1.8882e-10
Tspan8	210.801	-3.06413	0.423227	-7.23993	4.48908e-13	2.43324e-10
Akr1b8	73.3713	-2.80824	0.391269	-7.17726	7.11215e-13	3.72653e-10
Usp40	613.523	0.819221	0.116128	7.05449	1.73236e-12	8.78421e-10
AC121740.1	34.2104	6.3432	0.910637	6.96567	3.26847e-12	1.5359e-09
Mgam	750.515	1.33547	0.191746	6.9648	3.28878e-12	1.5359e-09
AABR07024463.1	52.2648	3.33566	0.479029	6.96338	3.32214e-12	1.5359e-09
AY172581.10	47.2591	8.46262	1.22365	6.9159	4.64888e-12	2.08788e-09
Mt-nd3	13850.7	1.01426	0.147069	6.89646	5.3316e-12	2.32798e-09
Rps18l1	219.497	1.38083	0.200392	6.89063	5.55458e-12	2.3598e-09
Rps10	2884.46	1.04741	0.152286	6.8779	6.07394e-12	2.51254e-09
Rpl6	3881.13	0.691824	0.100678	6.87168	6.34502e-12	2.55737e-09
RT1-CE7	685.444	-1.19021	0.173492	-6.86034	6.86968e-12	2.69961e-09
LOC685767	21.2453	3.41579	0.499702	6.83566	8.16276e-12	3.12952e-09
LOC100364500	80.1227	2.2086	0.32896	6.7139	1.89489e-11	7.09186e-09
AC128207.2	52.4639	2.55644	0.382107	6.69039	2.22576e-11	8.13646e-09
C17h6orf52	40.3612	2.65038	0.396566	6.68333	2.3358e-11	8.34464e-09
Lilrb3	353.961	1.67625	0.250939	6.67992	2.39069e-11	8.35094e-09
Ptprh	174.332	-1.68214	0.252656	-6.65785	2.77867e-11	9.49519e-09
Pls1	748.108	1.35342	0.204568	6.61598	3.69101e-11	1.23445e-08
Rpl14	5406.91	0.627688	0.0954502	6.57607	4.83033e-11	1.58183e-08
Lamc2	384.443	-1.56524	0.239131	-6.54554	5.92818e-11	1.90174e-08
Ctgf	927.044	-3.25148	0.501062	-6.48918	8.63062e-11	2.71329e-08
Serpina5	125.626	2.64599	0.416887	6.34702	2.19529e-10	6.76621e-08
Krt80	26.0751	-4.0411	0.638038	-6.33363	2.39458e-10	7.23854e-08
Wnt7a	37.7595	-3.26654	0.518255	-6.30295	2.92034e-10	8.62347e-08
Eif2b2	374.718	0.819844	0.130119	6.30073	2.96245e-10	8.62347e-08
Vom2r44	25.8727	2.69424	0.429423	6.27409	3.51693e-10	1.00514e-07
Plat	275.093	-1.90104	0.304164	-6.25005	4.10311e-10	1.15173e-07
Reep6	7774.88	1.05426	0.169249	6.22905	4.69284e-10	1.29415e-07
Tp53i3	525.396	0.875556	0.140834	6.21692	5.07016e-10	1.3741e-07
Sel1l3	170.222	-1.47259	0.237375	-6.20364	5.51709e-10	1.46988e-07
AABR07033745.1	21.8559	7.7162	1.25389	6.15383	7.5636e-10	1.98154e-07
Mrps35	584.714	0.805714	0.131132	6.14432	8.03078e-10	2.06944e-07
Tmprss3	15.2605	-3.98919	0.649856	-6.13857	8.32656e-10	2.11105e-07
Rnf8	504.358	0.914764	0.149139	6.13362	8.58993e-10	2.14326e-07
Slc30a3	98.0755	-1.68266	0.274454	-6.13093	8.73661e-10	2.14579e-07
Adora1	296.585	-1.49943	0.244871	-6.12333	9.16374e-10	2.21607e-07
Cpb1	59.4709	-3.01606	0.493117	-6.11631	9.57641e-10	2.28078e-07
Sfn	42.8735	-3.30045	0.540819	-6.10269	1.04298e-09	2.44695e-07
Cyp2c6v1	23775.3	-1.19101	0.195572	-6.08989	1.12987e-09	2.61182e-07
Anxa13	194.15	-1.61318	0.265342	-6.07963	1.20462e-09	2.74426e-07
AABR07015346.1	91.4935	1.44536	0.238152	6.06908	1.28642e-09	2.88874e-07
AABR07043748.1	176.695	-1.31406	0.217948	-6.02921	1.6476e-09	3.64769e-07
Wnt7b	40.0378	-3.80787	0.632162	-6.02357	1.70609e-09	3.72472e-07
Spint1	83.3518	-1.80485	0.300201	-6.01214	1.83093e-09	3.94252e-07
Psmg3	323.683	-0.990867	0.165063	-6.00298	1.93733e-09	4.11525e-07
AABR07029275.1	37.0169	-4.98828	0.831488	-5.99923	1.9826e-09	4.15527e-07
Scrn1	101.917	-1.80818	0.301979	-5.98776	2.12748e-09	4.40024e-07
Pdia5	908.334	-1.71198	0.288028	-5.94378	2.78527e-09	5.61304e-07
RT1-T24-3	159.485	1.39054	0.233921	5.9445	2.77302e-09	5.61304e-07
Gstm1	19906.8	-1.13014	0.191396	-5.90475	3.53174e-09	7.02726e-07
Nsf	442.559	0.807354	0.136946	5.8954	3.73767e-09	7.34406e-07
Ccdc77	268.851	-0.920991	0.156388	-5.88916	3.88158e-09	7.53266e-07
Fam120b	487.954	-0.544996	0.0933779	-5.83646	5.33203e-09	1.01077e-06
Ifi44	240.578	1.09254	0.187197	5.83631	5.3371e-09	1.01077e-06
Rnd1	130.567	-1.55424	0.266864	-5.82407	5.74306e-09	1.0747e-06
Rtel1	733.028	0.922802	0.158742	5.81322	6.12815e-09	1.13328e-06
Tnfrsf12a	166.786	-1.50156	0.2588	-5.80199	6.55314e-09	1.19778e-06
Prelid2	365.442	1.94852	0.336668	5.78764	7.13817e-09	1.28971e-06
Adcyap1r1	114.971	1.86822	0.323136	5.78152	7.40305e-09	1.32237e-06
Acsf3	513.506	-0.800444	0.139213	-5.74977	8.93664e-09	1.57837e-06
Bcl3	474.073	-1.50926	0.26303	-5.73798	9.58102e-09	1.67338e-06
C1s	9264.82	-0.785007	0.138129	-5.68314	1.3224e-08	2.28427e-06
Amotl1	157.446	1.69898	0.300848	5.64731	1.62981e-08	2.78467e-06
Rpl35	6053.48	0.557225	0.0993327	5.60969	2.02694e-08	3.38952e-06
AC120486.9	15.0434	3.71666	0.662377	5.61109	2.01055e-08	3.38952e-06
Hs3st3a1	18.6285	-2.61479	0.466346	-5.60697	2.05905e-08	3.40697e-06
Nufip1	232.156	0.807404	0.144636	5.58231	2.3734e-08	3.8862e-06
RT1-T24-4	465.833	0.876261	0.158155	5.54052	3.01571e-08	4.88701e-06
Sfmbt1	689.873	0.554982	0.100414	5.52692	3.25908e-08	5.22749e-06
Krt7	251.943	-2.55401	0.46276	-5.51907	3.40805e-08	5.41123e-06
RGD1359290	305.617	4.69388	0.852636	5.50514	3.68883e-08	5.79847e-06
Ccdc167	91.6276	1.3893	0.252967	5.492	3.97409e-08	6.18502e-06
Prrg4	64.1063	-2.08969	0.38268	-5.46068	4.74304e-08	7.2893e-06
Acad10	2102.56	0.860349	0.157589	5.45944	4.77637e-08	7.2893e-06
P2rx5	81.6495	-2.44757	0.452765	-5.40583	6.45102e-08	9.68939e-06
Adgrg1	190.632	-1.42663	0.263934	-5.40524	6.47233e-08	9.68939e-06
Cyp4v3	3662.76	-0.756842	0.140261	-5.39594	6.81653e-08	1.01084e-05
Stab1	560.64	1.06662	0.198135	5.3833	7.31345e-08	1.05468e-05
Smpd3	402.455	-1.09193	0.202835	-5.38335	7.31125e-08	1.05468e-05
Cldn4	64.2426	-2.00627	0.372511	-5.38579	7.21252e-08	1.05468e-05
Bche	314.334	1.49206	0.278022	5.36669	8.0194e-08	1.14192e-05
Rpl4	13224.9	0.541042	0.100833	5.3657	8.0637e-08	1.14192e-05
Pmepa1	130.144	-1.64543	0.307681	-5.34784	8.90119e-08	1.24927e-05
Anp32b	1987.18	0.644074	0.120638	5.33889	9.3515e-08	1.30085e-05
LOC108348062	80.3758	1.83564	0.343969	5.33665	9.46771e-08	1.30546e-05
RT1-N2	277.871	6.16692	1.15907	5.32059	1.0343e-07	1.41375e-05
Vps52	1194.09	0.67687	0.128207	5.27951	1.29532e-07	1.75527e-05
Poll	359.11	0.789012	0.149539	5.27628	1.31829e-07	1.77113e-05
Anxa2	988.277	-0.97947	0.186682	-5.24671	1.54836e-07	2.0626e-05
Aoc1	72.3148	-5.90743	1.12781	-5.23797	1.6235e-07	2.12665e-05
Eif5b	1006.07	0.514243	0.0981539	5.23915	1.6132e-07	2.12665e-05
Irx1	93.9336	-3.51742	0.676061	-5.20282	1.96286e-07	2.5181e-05
Rpl41	10256.6	0.57734	0.110922	5.20492	1.94077e-07	2.5181e-05
Serhl2	101.203	-1.25843	0.241907	-5.20211	1.9704e-07	2.5181e-05
Siglec10	63.0598	1.44728	0.278367	5.1992	2.0015e-07	2.53723e-05
Cyp1b1	57.1178	-2.6738	0.515472	-5.18709	2.13604e-07	2.68611e-05
LOC108349682	575.133	1.15665	0.223392	5.17769	2.24644e-07	2.80253e-05
Zbtb42	129.099	-1.18755	0.229815	-5.16743	2.37337e-07	2.93756e-05
Gnptab	495.99	-0.575104	0.111389	-5.16305	2.42959e-07	2.98366e-05
F11r	2938.96	-0.436293	0.0850227	-5.13148	2.87471e-07	3.50291e-05
Rps10l1	504.675	-2.03127	0.396166	-5.12731	2.93909e-07	3.52669e-05
RT1-CE5	642.35	0.757435	0.147699	5.12822	2.92496e-07	3.52669e-05
Rasgef1b	317.986	-1.25299	0.24458	-5.12302	3.00677e-07	3.58056e-05
Dstn	1036.44	0.713596	0.139485	5.11595	3.12171e-07	3.68949e-05
Cav2	249.226	-1.06389	0.20838	-5.10555	3.2984e-07	3.86922e-05
Cryab	218.477	-1.18779	0.233854	-5.0792	3.79024e-07	4.3808e-05
LOC688553	31.1406	-2.49405	0.490957	-5.07997	3.77497e-07	4.3808e-05
Col13a1	276.594	1.06724	0.210379	5.07291	3.9177e-07	4.49507e-05
Dusp15	32.207	-4.05822	0.800386	-5.07033	3.97136e-07	4.52361e-05
Cdh6	29.719	-3.07943	0.60789	-5.06576	4.06776e-07	4.60008e-05
Arrdc3	578.578	1.60191	0.316608	5.05958	4.20175e-07	4.6842e-05
Hyal1	317.567	-1.24124	0.245295	-5.06019	4.18834e-07	4.6842e-05
Sncg	102.327	-2.44761	0.484369	-5.05319	4.34495e-07	4.80974e-05
Plek2	105.25	-1.03462	0.204884	-5.04978	4.42313e-07	4.86204e-05
Ldhd	559.139	-0.880993	0.174561	-5.04692	4.48998e-07	4.90125e-05
Cd44	262.439	-1.42629	0.28373	-5.02691	4.98438e-07	5.40341e-05
AABR07059807.1	22.3531	6.58817	1.31316	5.01703	5.24772e-07	5.64993e-05
Eef1d	1586.24	0.413901	0.082628	5.00921	5.46528e-07	5.84413e-05
S100a6	279.015	-1.82228	0.366256	-4.97543	6.51014e-07	6.91335e-05
Cdh17	154.094	-2.91209	0.585596	-4.97286	6.59713e-07	6.91335e-05
Cyp3a18	2398.34	1.4666	0.294893	4.97334	6.58082e-07	6.91335e-05
LOC680254	89.1086	0.924631	0.186437	4.95947	7.06864e-07	7.3584e-05
Abca1	2729.2	0.629114	0.127417	4.93743	7.91603e-07	8.13282e-05
AABR07037536.1	12.6772	3.609	0.730818	4.9383	7.88051e-07	8.13282e-05
Cuedc2	313.332	0.641057	0.129935	4.93367	8.06977e-07	8.21113e-05
Cwc22	282.646	0.711264	0.144221	4.93177	8.14897e-07	8.21113e-05
AABR07030091.1	131.238	-2.90865	0.589649	-4.93284	8.10408e-07	8.21113e-05
Havcr1	20.8256	-3.19441	0.650209	-4.91289	8.9742e-07	8.98506e-05
RGD1359508	48.359	1.58239	0.322316	4.90943	9.13427e-07	9.03029e-05
Ttll9	134.764	-1.84936	0.376692	-4.90948	9.13165e-07	9.03029e-05
Rbp1	6500.07	0.781517	0.159385	4.90334	9.42204e-07	9.2193e-05
Slc13a2	26.9723	-2.29041	0.467153	-4.90291	9.44276e-07	9.2193e-05
LOC100362830	6266.47	0.522505	0.106701	4.8969	9.73624e-07	9.44716e-05
Cdx2	16.4799	-6.37565	1.30356	-4.89094	1.00355e-06	9.67778e-05
Tenm2	22.8624	2.31292	0.475112	4.86816	1.1264e-06	0.000107963
RGD1306271	57.2286	-1.4087	0.290421	-4.85053	1.23133e-06	0.000116599
RGD1562310	276.107	-1.07231	0.221031	-4.85142	1.22581e-06	0.000116599
AABR07013746.1	160.765	0.961395	0.198718	4.83799	1.31159e-06	0.000123454
Snx8	522.543	0.52726	0.10904	4.83546	1.32837e-06	0.000124289
Clstn1	347.48	-0.901149	0.186738	-4.82573	1.39488e-06	0.00012974
Fxyd2	90.3716	1.57301	0.327037	4.80987	1.51026e-06	0.000138829
Ephx2	976.778	3.09282	0.642907	4.81068	1.50418e-06	0.000138829
Tuba1c	83.9723	-1.5628	0.325167	-4.80616	1.5386e-06	0.000140612
AABR07003235.1	18.2951	-2.278	0.475029	-4.79548	1.62283e-06	0.000146694
Vwa1	82.2294	-1.64486	0.34301	-4.79536	1.62381e-06	0.000146694
Cadm1	217.565	-1.33608	0.278831	-4.79172	1.65359e-06	0.00014853
Rgs5	128.318	-1.75037	0.365809	-4.78493	1.71051e-06	0.00015277
Ttc28	274.835	0.608697	0.12732	4.78086	1.74551e-06	0.000155015
H3f3c	407.234	-1.09249	0.228644	-4.77815	1.76915e-06	0.000156232
Endog	109.336	-0.897025	0.188313	-4.76349	1.90274e-06	0.000166162
Fads6	2099.68	-0.990977	0.208028	-4.76367	1.90107e-06	0.000166162
Gpx2	136.304	-2.55302	0.536605	-4.75773	1.9578e-06	0.000170026
Qsox1	3711.03	0.965855	0.203251	4.75202	2.01391e-06	0.000173938
Matn4	28.717	-2.27968	0.481036	-4.7391	2.14673e-06	0.000184396
Cmc1	286.875	-0.949797	0.200802	-4.73002	2.24494e-06	0.000191784
Pla2g4c	72.0912	5.36547	1.13646	4.72122	2.34433e-06	0.000198624
Tat	24439.4	-1.64515	0.348497	-4.72071	2.35029e-06	0.000198624
Guca2b	35.4578	-2.49959	0.530723	-4.70978	2.47981e-06	0.00020845
AABR07063995.1	7.3201	-6.80049	1.44631	-4.70195	2.57683e-06	0.000215453
LOC103694169	1835.17	0.487921	0.103888	4.69662	2.64495e-06	0.000219979
Fam198a	90.0402	-1.37244	0.293044	-4.68338	2.82177e-06	0.000233449
Arglu1	938.903	0.415213	0.0887014	4.68102	2.85453e-06	0.000234923
Gnl3	846.91	0.690864	0.147677	4.6782	2.89405e-06	0.000236935
LOC100362216	208.464	-1.03918	0.222293	-4.67483	2.94193e-06	0.000239607
Epcam	533.146	-1.18096	0.252686	-4.67363	2.9592e-06	0.000239772
Usp54	392.268	-0.589521	0.126169	-4.67248	2.97588e-06	0.000239887
Heg1	365.89	-0.743018	0.159519	-4.65786	3.19506e-06	0.000256241
LOC103690878	12.6309	4.39227	0.943544	4.65508	3.23861e-06	0.000256492
Dicer1	971.354	0.395318	0.0849424	4.65396	3.25622e-06	0.000256492
Slc15a1	33.3784	-3.01662	0.648247	-4.6535	3.26346e-06	0.000256492
Sgpl1	1708.99	0.797015	0.171242	4.65432	3.25049e-06	0.000256492
Dtx4	160.691	-0.743007	0.159783	-4.6501	3.31778e-06	0.000259464
Spry4	179.892	1.15479	0.248683	4.64361	3.4238e-06	0.000266429
Ephb6	153.439	1.27832	0.276821	4.61786	3.87718e-06	0.000298752
Tacr1	9.91102	-6.49261	1.40597	-4.61788	3.87682e-06	0.000298752
Zfp142	714.834	0.592209	0.128467	4.60983	4.02992e-06	0.000309007
Slco1a1	1820.43	-0.728127	0.158168	-4.60351	4.15426e-06	0.000316994
Tm4sf20	25.4871	-6.00956	1.30839	-4.59309	4.36733e-06	0.000330149
Cacna1d	486.028	-0.873953	0.190278	-4.59303	4.36866e-06	0.000330149
AC134224.1	1461.21	0.860614	0.187574	4.58813	4.47245e-06	0.000336375
Mpped1	19.7462	8.24373	1.79759	4.58599	4.51849e-06	0.000337366
Comtd1	307.903	-0.806534	0.175887	-4.58552	4.52854e-06	0.000337366
Cdhr5	36.6537	-2.26754	0.494954	-4.58132	4.62049e-06	0.000342592
Prg4	1825.04	1.31587	0.287353	4.57929	4.66548e-06	0.000344304
Trim16	21.2493	-2.94789	0.644359	-4.57492	4.76398e-06	0.00034993
Dhfr	1513.34	0.671942	0.146921	4.57348	4.79683e-06	0.000350704
Tmem163	43.5003	-2.69065	0.58971	-4.56266	5.05096e-06	0.000367574
Dusp6	508.382	0.952507	0.209726	4.54168	5.58071e-06	0.000404254
Rps11	4514.48	0.415351	0.0915836	4.53521	5.7545e-06	0.000414931
Cyp4a8	149.925	3.5748	0.789828	4.52605	6.00969e-06	0.000431353
Emc2	554.312	0.568101	0.125646	4.52143	6.14221e-06	0.000438861
Tnnt1	46.3274	1.13025	0.250416	4.51351	6.37636e-06	0.000453529
Cxcl16	334.728	-0.966011	0.214136	-4.51119	6.44636e-06	0.000456443
Serinc2	43.848	-1.95087	0.433002	-4.50544	6.62355e-06	0.000466886
RGD1563354	134.176	-1.35738	0.301574	-4.50098	6.76394e-06	0.000474653
Cyp2c13	6896.43	2.28615	0.509909	4.48344	7.34507e-06	0.000513143
AC095947.3	1141.31	1.0495	0.234566	4.47422	7.66909e-06	0.000533409
Reg4	93.8783	1.22427	0.274114	4.46629	7.95879e-06	0.000550997
LOC100362027	2222.14	-0.703346	0.15751	-4.4654	7.99207e-06	0.000550997
Col8a1	85.165	-2.89473	0.649867	-4.45433	8.41541e-06	0.00057765
Zwint	939.854	0.415166	0.0933856	4.44572	8.75999e-06	0.000598688
AABR07015078.1	750.388	1.05894	0.238445	4.44103	8.95289e-06	0.000609223
Pdgfb	43.9333	-1.3802	0.310977	-4.43827	9.06855e-06	0.000614434
Stx1b	31.5937	1.7336	0.391245	4.431	9.37984e-06	0.000631186
Hsd17b6	889.309	2.60413	0.587756	4.43062	9.39611e-06	0.000631186
Lasp1	3494.38	-0.426134	0.0964133	-4.41987	9.87603e-06	0.000660601
Celsr1	84.998	-1.51739	0.343703	-4.41484	1.01086e-05	0.000670454
Timmdc1	600.822	0.605905	0.137218	4.41565	1.00708e-05	0.000670454
Igf2r	1535.44	-0.766621	0.173809	-4.4107	1.03035e-05	0.000680507
Noct	298.759	-2.21164	0.501645	-4.40877	1.03959e-05	0.00068089
AY172581.18	156.71	1.34871	0.305857	4.4096	1.03561e-05	0.00068089
Vsig10l	99.446	-0.848347	0.19257	-4.40539	1.05594e-05	0.000688725
Ppp4r3a	839.931	0.427417	0.097049	4.40414	1.06203e-05	0.000689838
Slc20a2	1446.39	0.603764	0.137254	4.39889	1.08805e-05	0.000703832
LOC683897	367.459	0.585812	0.133212	4.39759	1.09458e-05	0.000705152
Rtl8a	429.446	0.493516	0.112425	4.38973	1.13492e-05	0.000728156
RT1-Ba	681.43	-1.79355	0.40964	-4.37836	1.19576e-05	0.000764071
Jcad	761.262	-0.788496	0.180354	-4.37195	1.23143e-05	0.000783676
Cpa2	338.096	1.87644	0.429651	4.36736	1.25758e-05	0.000797091
Clec2dl1	89.537	-1.42954	0.327703	-4.3623	1.28705e-05	0.000812495
Scn1b	176.842	-1.21874	0.279774	-4.35617	1.32359e-05	0.000822355
Hsd3b7	1388.42	0.963838	0.221152	4.35825	1.31104e-05	0.000822355
Slc11a1	483.876	0.814215	0.186859	4.35738	1.31631e-05	0.000822355
Hsf2	423.535	0.561985	0.129	4.35646	1.32184e-05	0.000822355
Ctnnb1	1633.7	-0.507964	0.116633	-4.35523	1.32928e-05	0.000822634
Serpina3m	5401.33	-0.929722	0.213605	-4.35253	1.34578e-05	0.000826342
Ppip5k2	1441.47	0.405702	0.0932074	4.35268	1.34485e-05	0.000826342
Apc2	57.0685	1.1847	0.272541	4.34688	1.38088e-05	0.00084459
Itpr2	298.154	-0.849717	0.195527	-4.34579	1.38776e-05	0.000845512
Cep83	307.936	0.538946	0.12441	4.33201	1.47755e-05	0.000896742
Itga3	162.766	-1.1662	0.269663	-4.32465	1.52771e-05	0.000923618
Bmp2	296.506	0.758451	0.175463	4.32256	1.54228e-05	0.000928852
Lrpprc	1813.45	0.484039	0.112324	4.30929	1.6378e-05	0.00098262
Dtx3l	379.515	0.802532	0.186289	4.30799	1.64747e-05	0.000984659
Sdr42e1	770.511	0.580186	0.134845	4.3026	1.68804e-05	0.00100509
F11	4630.67	0.582876	0.135634	4.29741	1.72804e-05	0.00102502
Lyz2	939.16	-1.00907	0.234879	-4.29611	1.73823e-05	0.00102719
Pim3	665.371	-1.06506	0.250227	-4.25639	2.07757e-05	0.00122312
Zc3h7a	1136.29	0.440789	0.103649	4.25272	2.11185e-05	0.00123867
Tacstd2	20.7887	-3.53213	0.831671	-4.24703	2.16621e-05	0.00125926
Dpys	6041.07	0.708708	0.166891	4.24654	2.17101e-05	0.00125926
Col7a1	35.8542	-1.47498	0.347233	-4.24781	2.15869e-05	0.00125926
Cblc	33.9449	-1.71476	0.404066	-4.24376	2.19808e-05	0.00126101
Slit1	14.5556	-3.66878	0.864397	-4.24432	2.19261e-05	0.00126101
Rpl12	3811.29	0.483505	0.113924	4.24409	2.19479e-05	0.00126101
Lmo4	336.259	0.741399	0.175084	4.23453	2.29029e-05	0.00130913
Tfrc	2912.09	-1.48423	0.351116	-4.22719	2.36628e-05	0.00134766
Rasl11b	52.7096	-1.48621	0.35172	-4.22556	2.38351e-05	0.00135258
AC127784.2	22.006	-3.16622	0.749663	-4.22352	2.40515e-05	0.0013575
Lmnb1	167.577	-0.814591	0.192889	-4.22312	2.40946e-05	0.0013575
LOC100909712	1129.94	0.539399	0.127787	4.22109	2.43128e-05	0.0013649
Uox	16396.2	-0.544691	0.129119	-4.21852	2.45914e-05	0.00137563
Blk	63.6428	-1.09691	0.260476	-4.21118	2.54035e-05	0.00141602
Zswim7	28.2007	1.6786	0.399394	4.20287	2.63551e-05	0.00146387
Cd200r1l	92.1506	0.968149	0.23074	4.19584	2.71868e-05	0.00150475
Sumo3	1782.15	0.370692	0.0888145	4.17377	2.99597e-05	0.00165241
Abcd2	690.33	1.05736	0.254178	4.15991	3.18372e-05	0.00174982
Celsr2	53.2581	-1.16313	0.279701	-4.15848	3.20371e-05	0.00175468
AABR07062512.1	301.496	-0.531371	0.127828	-4.15692	3.22571e-05	0.00176059
Rab11fip4	231.942	-0.753023	0.181328	-4.15283	3.2839e-05	0.00178615
AABR07035008.1	22.9909	1.75229	0.422064	4.15172	3.29988e-05	0.00178865
Fzd1	322.668	-0.779196	0.187852	-4.14793	3.35493e-05	0.00181224
Lrfn3	19.0741	2.85451	0.688555	4.14565	3.38844e-05	0.00181638
Erich5	34.3935	-1.92038	0.463295	-4.14506	3.39727e-05	0.00181638
Krt8	5216.21	-0.588143	0.141863	-4.14584	3.38564e-05	0.00181638
Acmsd	198.615	-2.86516	0.691423	-4.14385	3.41517e-05	0.00181977
Luc7l2	1958.63	0.438567	0.105913	4.14082	3.46066e-05	0.00183777
AABR07011062.1	5.1921	3.90151	0.944872	4.12914	3.64126e-05	0.0019207
Ift140	414.818	-0.6218	0.150584	-4.12927	3.63915e-05	0.0019207
Serpina11	5090.35	0.495686	0.120154	4.12541	3.70071e-05	0.00194553
Laptm4b	710.44	0.746564	0.181004	4.12458	3.71415e-05	0.00194609
Fbxo9	1180.61	-0.468567	0.11369	-4.12145	3.765e-05	0.00195671
Cxadr	340.812	-0.724752	0.175867	-4.12103	3.77177e-05	0.00195671
Slc12a4	670.081	-0.502669	0.121932	-4.12255	3.74704e-05	0.00195671
Sacs	137.305	0.787195	0.191576	4.10905	3.97288e-05	0.00205427
Lilrb2	27.9635	1.78625	0.43495	4.10679	4.01192e-05	0.00206765
Sephs2	1924.69	0.679265	0.165517	4.10391	4.06226e-05	0.00208676
Tmem184b	530.758	-0.511546	0.124712	-4.10182	4.0992e-05	0.00209887
Acp5	337.472	-0.822891	0.201056	-4.09284	4.26116e-05	0.00217471
Dhx16	684.156	-0.408775	0.0999277	-4.09071	4.3006e-05	0.00218774
Cdh3	136.425	-1.28403	0.314038	-4.08878	4.33653e-05	0.0021989
Casp12	213.281	-1.13752	0.278825	-4.0797	4.50931e-05	0.00227916
Comt	12643.9	-0.614311	0.1508	-4.07367	4.6279e-05	0.0023316
Tmem35b	22.8801	1.6289	0.400134	4.0709	4.68318e-05	0.00235191
Wipf3	104.711	-1.13363	0.278602	-4.06899	4.72165e-05	0.00236368
Kdelr3	167.427	-0.692757	0.170317	-4.06747	4.75271e-05	0.00237168
Usp22	284.778	-0.672883	0.165936	-4.05507	5.01191e-05	0.00248524
RT1-CE3	39.2481	1.83911	0.453479	4.05556	5.00143e-05	0.00248524
St8sia1	25.6796	-2.95898	0.73018	-4.05239	5.06967e-05	0.00250598
Pfn1	3024.73	-0.339527	0.083865	-4.0485	5.15478e-05	0.00254006
AY172581.19	17.4357	2.14643	0.531134	4.04121	5.31751e-05	0.00261206
Cldn6	73.5305	-1.29122	0.320282	-4.03151	5.54208e-05	0.00271389
Fbn2	60.8751	-1.55269	0.385582	-4.02686	5.65267e-05	0.00275945
Gstm3l	132.59	-1.58968	0.395041	-4.02408	5.71994e-05	0.00278364
AABR07035309.1	132.764	-1.09196	0.272002	-4.01452	5.95674e-05	0.00288994
S100b	61.1186	-1.83231	0.456769	-4.01146	6.03431e-05	0.00291856
Rpl32	4702.68	0.447582	0.111615	4.01004	6.07073e-05	0.00292717
Arl4d	151.55	-1.35162	0.337177	-4.00864	6.10692e-05	0.00293562
AABR07001634.1	57.9884	-2.13153	0.531916	-4.00726	6.1427e-05	0.00294381
Pacs2	401.157	-0.537515	0.134176	-4.00604	6.17458e-05	0.0029501
Mettl7a	944.183	-1.19884	0.299619	-4.0012	6.30211e-05	0.00300191
Rab11fip1	270.819	-0.540427	0.135133	-3.99923	6.35495e-05	0.00301793
Mmp12	27.9322	-3.15425	0.790311	-3.99115	6.57528e-05	0.00311316
AABR07035539.1	234.175	1.11641	0.279843	3.98942	6.62339e-05	0.00312652
Otulin	236.304	-0.604411	0.151544	-3.98836	6.65305e-05	0.00313112
Oard1	351.701	-0.504528	0.126637	-3.98406	6.77491e-05	0.00317895
Hbs1l	833.189	0.45366	0.113974	3.98039	6.88021e-05	0.00321875
Gpt2	1725.27	-0.611235	0.153708	-3.97661	6.99061e-05	0.00325788
Pbld1	2106	-0.894322	0.224924	-3.97611	7.0053e-05	0.00325788
Traf3	257.923	-0.546091	0.137583	-3.96919	7.21173e-05	0.00333427
AABR07044364.1	29.2695	-1.79945	0.453356	-3.96918	7.21198e-05	0.00333427
Rhou	275.928	-0.685159	0.172933	-3.962	7.43231e-05	0.00342606
Cys1	28.0306	-1.63707	0.413526	-3.9588	7.53278e-05	0.00346222
Wfdc21	2714.89	-1.446	0.365474	-3.95651	7.60531e-05	0.00348536
Pip4p2	359.051	-0.627117	0.158739	-3.95063	7.79473e-05	0.00356178
Tob1	976.048	-0.873016	0.221227	-3.94624	7.93878e-05	0.0036147
Cep19	363.125	0.517749	0.131218	3.94571	7.95653e-05	0.0036147
Hao2	2309.08	-1.15086	0.291965	-3.94178	8.08808e-05	0.00366388
AC111831.1	92.0302	0.87654	0.222472	3.93999	8.14837e-05	0.00368058
Dpep2	40.1117	1.07072	0.272185	3.93378	8.36199e-05	0.00376625
Atp6v0d1	2221.56	-0.303316	0.0771219	-3.93294	8.39139e-05	0.00376869
Ggps1	205.143	0.637404	0.162165	3.93059	8.47362e-05	0.00379478
Arrdc4	337.787	0.57178	0.145563	3.92807	8.56316e-05	0.00382398
Epn3	16.1675	-3.77522	0.961869	-3.92488	8.67729e-05	0.00386398
Krt17	10.3076	-5.10957	1.30208	-3.92416	8.7032e-05	0.00386456
Fam124a	117.43	0.686538	0.175041	3.92216	8.77574e-05	0.0038858
Mertk	537.693	0.495506	0.126496	3.91717	8.95958e-05	0.00395606
AABR07043510.1	27.4375	1.95846	0.500191	3.91542	9.02486e-05	0.00397372
Nutf2	832.605	0.49218	0.125897	3.9094	9.25273e-05	0.00406267
Mtr	208.414	0.629118	0.161272	3.90098	9.58033e-05	0.0041948
Shisa4	32.0414	-1.43983	0.369497	-3.89674	9.74964e-05	0.00425707
Loxl1	331.125	-0.94671	0.243214	-3.8925	9.92161e-05	0.00432016
Aldh7a1	6686.28	-0.513363	0.131969	-3.89004	0.000100228	0.00435215
Acsl1	35893.3	0.632331	0.162777	3.88465	0.000102479	0.00443763
Pfkl	870.919	-0.714492	0.184025	-3.88259	0.00010335	0.00446308
Pfas	538.759	-0.501308	0.129148	-3.88165	0.000103752	0.00446814
Socs5	216.967	-0.642371	0.165731	-3.876	0.000106189	0.00456063
Ptgds	38.1991	-1.69918	0.438857	-3.87184	0.000108018	0.00462652
Atl3	435.675	-0.937599	0.242205	-3.8711	0.000108347	0.004628
Epha1	1040.37	-0.44549	0.11519	-3.86743	0.000109988	0.00468537
RGD1563692	14.3343	-2.69973	0.698693	-3.86397	0.00011156	0.00473947
Gcc1	155.316	-0.734865	0.19041	-3.85937	0.000113678	0.00481644
Tmem123	1497.63	-0.532641	0.13835	-3.84997	0.000118135	0.00499183
Map2	118.96	-1.27298	0.330932	-3.84666	0.000119741	0.00504614
Orai2	67.8528	-0.968197	0.251782	-3.84538	0.000120363	0.0050588
Polr1e	148.205	0.719331	0.187112	3.84439	0.000120851	0.00506574
Slc34a2	1678.1	-0.773781	0.201484	-3.84041	0.000122827	0.00512935
AABR07028009.1	70.3187	-1.99839	0.520411	-3.84003	0.000123021	0.00512935
Nsmce2	410.115	0.51721	0.134767	3.8378	0.000124141	0.00515275
Nfil3	1275.52	0.66097	0.172235	3.83761	0.000124238	0.00515275
Sema3c	195.514	-1.35109	0.352252	-3.83558	0.000125269	0.00516827
Klrc2	17.5883	-1.70101	0.443425	-3.83608	0.000125014	0.00516827
Med21	190.486	0.523673	0.136596	3.83375	0.000126205	0.00517969
Ccdc80	2924.22	0.527302	0.13753	3.83409	0.000126028	0.00517969
Tpt1	36914.7	0.389263	0.101603	3.83121	0.000127516	0.00521984
Fabp5	3032.48	0.958446	0.250425	3.82728	0.000129569	0.005266
Prkcz	238.591	-0.785623	0.205278	-3.82713	0.000129648	0.005266
Tgm1	53.7209	-1.26486	0.330442	-3.82779	0.000129297	0.005266
AC094636.1	35.3139	4.2676	1.11545	3.8259	0.000130293	0.00527854
Pigv	153.05	-0.850805	0.222531	-3.8233	0.000131677	0.00531725
Zdhhc8	156.989	-0.695341	0.181891	-3.82284	0.000131925	0.00531725
Itgae	144.625	-0.870291	0.227719	-3.82178	0.000132495	0.00532655
Proz	12017	0.429288	0.112392	3.81957	0.000133684	0.00536068
AABR07011057.2	55.1866	3.1886	0.83523	3.81763	0.000134739	0.00538921
LOC498222	56.626	-1.55002	0.40609	-3.81694	0.000135116	0.00539057
Tmem144	245.16	-0.784452	0.205636	-3.81476	0.000136318	0.00542476
Rps27	5016.98	0.6119	0.160462	3.81335	0.000137095	0.00544191
Chd1l	629.52	0.717872	0.188459	3.80917	0.000139435	0.00550696
Cox16	618.662	0.543521	0.142671	3.80962	0.000139183	0.00550696
Pradc1	617.635	0.730397	0.191844	3.80724	0.000140525	0.00552227
Tmem229b	121.661	-0.691699	0.18167	-3.80745	0.000140408	0.00552227
Pamr1	406.451	-0.893241	0.234691	-3.80602	0.000141219	0.00553571
Bace1	366.001	-0.454046	0.119329	-3.805	0.000141802	0.00554474
Reg3b	175.49	-5.34674	1.40621	-3.80223	0.000143398	0.00557415
Slc16a2	3218.04	0.435839	0.114639	3.80185	0.000143618	0.00557415
Flt4	701.327	0.561915	0.147799	3.80188	0.000143601	0.00557415
Hif1an	88.9937	-0.916562	0.241291	-3.79857	0.000145534	0.00563346
Timp3	247.828	-1.00739	0.265352	-3.79643	0.000146796	0.00563346
Cyp8b1	3416.45	-2.18065	0.574431	-3.79619	0.000146938	0.00563346
Aox4	9.62254	-2.90108	0.763946	-3.7975	0.000146162	0.00563346
Pik3c2b	135.967	0.757547	0.199536	3.79655	0.000146724	0.00563346
Pkp1	15.0204	-3.20487	0.845932	-3.78857	0.000151516	0.00579484
Ifi27l2b	3784.76	-1.11095	0.29335	-3.78709	0.00015242	0.00581471
Lingo1	15.8336	-1.80344	0.476279	-3.78651	0.000152775	0.00581471
Zrsr2	161.743	0.659741	0.174335	3.78434	0.000154118	0.00585164
Ano1	145.568	-1.03464	0.273718	-3.77995	0.00015686	0.00594142
Catsperg	201.399	-0.762198	0.201827	-3.7765	0.000159046	0.00600973
Mbnl3	30.8021	2.19458	0.58182	3.77192	0.000161995	0.00609185
Kalrn	433.071	-0.594441	0.157589	-3.7721	0.000161878	0.00609185
Fut4	118.316	-0.647724	0.172166	-3.7622	0.000168426	0.0063186
Borcs8	340.011	-0.574826	0.152821	-3.76144	0.000168936	0.00632263
Bckdhb	1582.78	0.874682	0.232651	3.75963	0.000170164	0.00635347
Ndufa3	1202.09	0.424599	0.113119	3.75356	0.000174338	0.00647852
Abca8a	3040.71	0.660683	0.17599	3.7541	0.000173963	0.00647852
Hspb1	130.12	-1.64206	0.437813	-3.75059	0.000176418	0.00654038
Stxbp4	73.9663	-0.965438	0.25773	-3.74594	0.000179723	0.00664721
Sh3bp5	1075	0.830887	0.222334	3.73711	0.000186145	0.00686859
Plxdc2	78.3399	-1.42139	0.380615	-3.73446	0.000188118	0.00692514
Thoc1	322.991	0.424147	0.113811	3.72677	0.000193947	0.00712303
Sar1b	2048.01	0.488467	0.131269	3.72111	0.000198347	0.00726763
Tpm4	781.738	-0.572312	0.15386	-3.71968	0.000199472	0.00729185
Ppp1r1b	24.0391	2.15068	0.578321	3.71884	0.000200143	0.00729941
Fam167a	68.6364	1.26533	0.340316	3.71809	0.000200736	0.00730408
Synj2	211.156	-0.783754	0.210865	-3.71685	0.000201724	0.00730621
Cgrrf1	592.797	-0.466091	0.125381	-3.71741	0.000201276	0.00730621
Gstt3	6769.8	-1.8293	0.492605	-3.71353	0.000204391	0.0073858
Rspo3	204.69	0.623177	0.167867	3.71232	0.00020537	0.00739926
Zfp868	189.671	0.59664	0.160737	3.71191	0.000205705	0.00739926
Slc10a1	15016.4	0.495825	0.133674	3.70921	0.000207905	0.00744431
RGD1561777	117.315	-0.784841	0.211567	-3.70965	0.000207544	0.00744431
Fbxo44	63.6936	-1.32011	0.35603	-3.70785	0.000209028	0.00746752
Pigr	40886	1.2604	0.340023	3.70682	0.000209882	0.00748103
LOC100910996	15.9607	-2.90926	0.78546	-3.7039	0.000212313	0.00755055
Slc26a8	702.183	1.11376	0.301418	3.69505	0.000219845	0.00780078
Kcna6	10.4069	-2.7399	0.742897	-3.68813	0.000225907	0.00799781
Ifi44l	98.6343	-0.921701	0.250003	-3.68676	0.00022713	0.00802304
Svil	1108.77	0.607452	0.164792	3.68617	0.000227654	0.00802352
Capn1	386.659	-0.702305	0.19062	-3.68433	0.000229307	0.00805289
Gtf2e1	168.804	-0.840138	0.228044	-3.6841	0.000229512	0.00805289
Tnfsf13	188.75	0.655709	0.178068	3.68236	0.000231088	0.00809014
Ifitm1	2236.07	0.441097	0.119826	3.68115	0.000232181	0.00811033
Cd4	643.072	0.469383	0.127554	3.67987	0.000233354	0.00813323
Stfa2l1	5.21759	5.33569	1.45117	3.67683	0.00023615	0.0082125
AABR07034639.1	55.9619	0.892888	0.243122	3.67259	0.000240108	0.00833168
Atp5mc2	4795.38	0.35896	0.0978417	3.66878	0.000243709	0.00839469
Plin3	676.257	-0.544713	0.148486	-3.66845	0.000244028	0.00839469
Rpl19	6157.96	0.420762	0.114699	3.66841	0.00024406	0.00839469
Pfdn6	575.205	0.463596	0.126341	3.66941	0.000243115	0.00839469
Krtcap2	1101.5	0.471528	0.128627	3.66586	0.000246509	0.00844198
Zfp612	219.405	-0.624371	0.170317	-3.66595	0.000246426	0.00844198
Tm4sf4	3560.08	0.503904	0.137508	3.66456	0.000247767	0.00846662
Lmna	1196.17	-0.370905	0.101244	-3.66349	0.000248799	0.00848346
Apoc3	71203.5	0.681217	0.186018	3.6621	0.000250155	0.00851124
Sertad4	19.0102	-1.76633	0.482538	-3.66049	0.000251731	0.00854633
Smyd2	382.923	-0.696925	0.190424	-3.65986	0.000252349	0.00854888
Clic3	50.6839	-1.3228	0.361747	-3.65671	0.000255473	0.00861756
Trabd2b	14.1931	-2.38953	0.653417	-3.65697	0.000255212	0.00861756
AABR07072207.1	447.181	0.696106	0.190529	3.65355	0.000258638	0.00870563
Mfsd2a	1386.73	-2.33943	0.641	-3.64966	0.000262583	0.00881955
Gnai3	1649.91	-0.410493	0.112679	-3.64303	0.000269449	0.00903084
LOC108348106	7.64721	2.64472	0.72682	3.63876	0.00027395	0.00910407
Tep1	501.05	-0.488605	0.134258	-3.6393	0.000273375	0.00910407
Htra4	19.1407	-1.70596	0.468819	-3.63885	0.000273861	0.00910407
Abcc5	948.435	-0.502927	0.138175	-3.63979	0.000272861	0.00910407
Zfp202	276.735	0.525905	0.144571	3.63768	0.000275105	0.00912317
Fam89a	362.028	-0.673494	0.185303	-3.63457	0.00027845	0.00921464
Pfdn5	1043.35	0.383036	0.105473	3.63162	0.000281652	0.00928153
Acaa1a	5467.27	-0.48928	0.134712	-3.63205	0.000281182	0.00928153
Lgalsl	595.915	0.514548	0.141732	3.63043	0.00028295	0.00928722
Ccl24	168.401	1.07813	0.296974	3.63038	0.000283007	0.00928722
AABR07044414.1	65.0103	-1.75838	0.484603	-3.6285	0.000285078	0.00933571
Lrrc58	77.6361	-1.10746	0.305375	-3.62655	0.000287239	0.00938691
Col12a1	216.934	-1.02316	0.282215	-3.62545	0.000288459	0.00940722
Naaladl1	8.19503	-2.42957	0.670248	-3.62488	0.000289094	0.00940844
PVR	104.167	-0.90238	0.249094	-3.62264	0.000291608	0.00947065
AC094212.1	35.8398	-1.27183	0.351234	-3.62105	0.00029341	0.00949433
Cd300lg	37.293	1.16849	0.322704	3.62093	0.000293546	0.00949433
AABR07024593.2	25.1843	1.21361	0.335806	3.61403	0.000301472	0.00973067
Dhrs7	403.537	1.08482	0.300327	3.61212	0.000303705	0.00978266
Fahd1	1050.1	0.489501	0.135571	3.61065	0.000305433	0.00981821
Gsta5	9456.73	0.754063	0.20907	3.60675	0.000310051	0.00992606
Sox9	59.0374	-1.35876	0.376675	-3.60724	0.000309474	0.00992606
Gpx3	547.423	-0.813649	0.225678	-3.60536	0.000311723	0.00995929
Rps28	1391.82	0.508713	0.141216	3.60237	0.000315332	0.0100542
Rmnd1	1354.38	0.440868	0.122543	3.59766	0.00032109	0.0102002
Slc25a45	179.447	0.894771	0.248773	3.59674	0.000322227	0.0102002
Srsf11	1329.31	0.377419	0.10494	3.59652	0.000322508	0.0102002
AABR07058934.1	63.7106	1.00146	0.278398	3.59724	0.000321617	0.0102002
Fam220a	116.763	-1.08495	0.301735	-3.59572	0.000323491	0.0102108
Sgk1	1027.26	-1.28556	0.357595	-3.59502	0.000324371	0.010218
Nbeal1	81.9687	-0.920649	0.256349	-3.59138	0.000328929	0.0103409
Tnrc6a	831.333	0.439433	0.122391	3.59039	0.000330185	0.0103596
Ttc1	518.962	0.364194	0.101558	3.58607	0.000335695	0.0105115
Plekho1	331.749	0.467102	0.130411	3.58176	0.00034129	0.0106655
Tns1	942.432	-0.664729	0.186092	-3.57204	0.000354208	0.0110472
Zfp692	223.262	0.609579	0.170703	3.57099	0.000355633	0.0110478
Tbx4	10.6143	-2.74319	0.768133	-3.57125	0.000355284	0.0110478
Plxna3	104.246	-0.704356	0.197333	-3.56938	0.00035783	0.0110941
Lap3	3767.21	-0.508983	0.142619	-3.56883	0.000358577	0.0110954
Mpzl2	126.6	-1.28667	0.360717	-3.56697	0.000361132	0.0111525
Osgin1	6626.45	1.33825	0.375469	3.56421	0.000364956	0.0112485
Rps25	2437.27	0.536311	0.150499	3.56356	0.000365856	0.0112542
Tbc1d16	32.7862	-1.22836	0.344983	-3.56065	0.000369942	0.0113577
Rpl24	3970.87	0.40528	0.11386	3.55947	0.0003716	0.0113863
AABR07049554.2	3.43242	-5.09279	1.43101	-3.55887	0.000372455	0.0113903
LOC100909548	328.788	-0.574744	0.161834	-3.55144	0.000383127	0.0116939
LOC100911295	52.8023	1.24036	0.349385	3.55013	0.000385047	0.0117298
Mapk8ip1	296.131	-0.52919	0.149095	-3.54936	0.000386169	0.0117412
LOC497796	7.21875	2.62191	0.738807	3.54884	0.000386935	0.0117418
Afdn	584.846	-0.569117	0.160473	-3.5465	0.000390388	0.0118065
Ncald	584.905	0.46623	0.131467	3.54637	0.000390571	0.0118065
Adgrl1	1525.63	-0.629038	0.177503	-3.54381	0.000394394	0.0118992
Tfcp2l1	163.197	-1.05469	0.297716	-3.54261	0.000396191	0.0119305
C4b	265.722	-1.09052	0.307909	-3.54169	0.000397574	0.0119493
Lyve1	2332.36	0.59673	0.168591	3.53951	0.000400869	0.0120253
Ctr9	1459.17	0.565097	0.159688	3.53875	0.000402024	0.01203
Mybph	76.0772	-1.2248	0.346145	-3.5384	0.000402557	0.01203
Mical2	373.936	-0.641646	0.18155	-3.53427	0.000408906	0.0121966
Car9	77.6815	-1.31346	0.371738	-3.5333	0.000410412	0.0122183
Pqlc3	63.6429	-1.05291	0.29836	-3.52897	0.000417178	0.0123496
Tp53bp2	491.355	-0.400022	0.113343	-3.52932	0.000416622	0.0123496
Ngly1	825.215	-0.436952	0.123785	-3.52991	0.000415698	0.0123496
Cry2	654.054	0.471844	0.133744	3.52796	0.000418768	0.0123733
Tubb4a	17.5032	-1.66368	0.471903	-3.52547	0.000422731	0.012467
Slc35f5	627.35	-0.400978	0.114013	-3.51696	0.000436524	0.0128398
Lypd8	80.2783	-4.0794	1.16002	-3.51666	0.000437005	0.0128398
Gbp6	99.92	-1.51189	0.430137	-3.51489	0.000439935	0.0129018
Ier5	258.045	-0.808582	0.230276	-3.51135	0.000445829	0.0130502
Pllp	13.5778	-1.99797	0.569168	-3.51034	0.000447531	0.0130757
Habp2	5963.56	0.388154	0.110771	3.5041	0.000458146	0.0133441
Mapk10	11.7435	-2.13799	0.610167	-3.50395	0.000458413	0.0133441
LOC103690996	3.31157	-4.9498	1.41321	-3.50252	0.000460886	0.0133913
Izumo4	37.2264	1.0547	0.3013	3.50049	0.000464408	0.0134192
Cfap70	53.4725	0.879361	0.251197	3.50069	0.000464059	0.0134192
Ncf1	214.632	0.637731	0.182147	3.50118	0.000463204	0.0134192
Cd83	68.9436	-0.974693	0.278563	-3.49901	0.000466988	0.013469
Tdo2	7058.39	-1.60171	0.457971	-3.49741	0.000469799	0.0135005
Ywhaz	1877.32	-0.41289	0.118047	-3.49769	0.000469309	0.0135005
LOC100911107	57.0162	-4.4844	1.28303	-3.49516	0.00047377	0.0135898
Myrip	53.1812	-1.17715	0.337165	-3.49131	0.00048065	0.013762
Prkab1	2247.37	0.53562	0.153444	3.49065	0.000481848	0.0137712
Adgre1	581.216	0.684949	0.196341	3.48856	0.000485626	0.013854
Abat	1854.92	-0.566052	0.162855	-3.47581	0.000509316	0.0145035
Cx3cr1	15.9653	-2.07071	0.595921	-3.47481	0.00051122	0.0145314
Adh1	41822	0.655917	0.188969	3.47104	0.000518453	0.0146303
Pes1	991.653	0.32543	0.093778	3.47021	0.000520046	0.0146303
Gucy1b2	869.183	0.760693	0.219214	3.47009	0.000520285	0.0146303
Cxcl14	113.624	-1.46503	0.422049	-3.47124	0.000518061	0.0146303
Car5a	893.63	0.932499	0.268702	3.47038	0.000519724	0.0146303
Icoslg	946.169	-0.550733	0.158616	-3.47212	0.000516363	0.0146303
RGD1561161	188.651	-0.884608	0.255072	-3.46807	0.000524213	0.0146621
Mycbp	350.541	0.453122	0.130649	3.46823	0.000523894	0.0146621
Bambi	156.215	-0.550313	0.158657	-3.46858	0.000523215	0.0146621
Pdlim7	275.303	-0.687441	0.198283	-3.46697	0.00052637	0.0146963
Rps12	2331.55	0.378451	0.109198	3.46574	0.000528773	0.0147372
Slco1a2	3.36663	5.11933	1.47869	3.46208	0.000536022	0.0149128
Dclk1	67.1679	-1.36731	0.39521	-3.4597	0.000540781	0.0149657
Ly75	18.649	-1.89308	0.547151	-3.45989	0.000540399	0.0149657
Csrp2	408.175	0.590218	0.170594	3.45977	0.000540634	0.0149657
Oat	4606.08	-1.47907	0.427579	-3.45918	0.000541819	0.0149681
C1rl	1314.47	0.48326	0.13978	3.45728	0.000545649	0.0150211
AABR07021008.1	10.2915	2.36141	0.682986	3.45748	0.000545244	0.0150211
Zadh2	1265.18	0.461036	0.133372	3.45676	0.000546707	0.0150239
Tmem200c	9.11265	-2.94708	0.852958	-3.45513	0.000550023	0.0150887
Amigo1	123.74	-1.01891	0.295241	-3.45111	0.00055829	0.0152888
Tmem86b	4889.23	0.388782	0.112722	3.44904	0.000562579	0.0153794
Rpl37a	4999.62	0.343589	0.0997725	3.44372	0.000573764	0.015658
Wdr82	312.659	-0.500016	0.145311	-3.44101	0.000579546	0.0157817
Gpr137b	93.7928	-0.75368	0.219051	-3.44066	0.000580307	0.0157817
Col22a1	14.4157	-2.42539	0.705494	-3.43786	0.000586332	0.015918
Ubl5	1197.85	0.306756	0.0893613	3.43276	0.000597465	0.0161923
Pnn	1259.67	0.436764	0.127353	3.42956	0.00060456	0.0163564
AABR07007789.1	12.665	2.30657	0.673017	3.42721	0.000609818	0.0164703
Mrps17	468.954	0.378967	0.110614	3.42602	0.000612487	0.016514
Egr1	836.902	1.3274	0.387601	3.42467	0.000615554	0.0165683
Rps9	1033.63	0.900635	0.263306	3.42049	0.000625091	0.0167962
Tsc22d1	3427.39	0.568155	0.166167	3.41918	0.000628104	0.0168484
Cd99l2	13.3172	2.3591	0.690591	3.41606	0.000635351	0.0170138
LOC360919	3532.72	0.580391	0.170236	3.40932	0.000651241	0.0174096
Matk	57.902	0.87725	0.257653	3.40477	0.000662188	0.0176515
Rnf5	1347.34	0.488887	0.143595	3.40463	0.000662535	0.0176515
Ggt1	79.1125	-1.64812	0.484149	-3.40416	0.000663677	0.017652
Psenen	1415.71	0.326474	0.0960475	3.39909	0.0006761	0.017952
Bpi	12.7022	-2.46034	0.724182	-3.3974	0.000680282	0.0180169
Tvp23b	564.678	-0.456148	0.134272	-3.39718	0.000680833	0.0180169
Foxe1	5.95876	-5.49179	1.61835	-3.39345	0.000690179	0.0182335
Ube3b	375.215	-0.400351	0.117996	-3.39292	0.000691506	0.0182379
S100a11	466.367	-0.874766	0.25848	-3.38426	0.000713691	0.0186664
Atpaf1	620.581	0.373407	0.110331	3.38442	0.000713285	0.0186664
Rhoq	190.617	-0.66756	0.19725	-3.38434	0.000713507	0.0186664
Mnda	141.91	0.717711	0.212042	3.38475	0.000712421	0.0186664
Cep95	415.178	0.603662	0.178314	3.38539	0.000710782	0.0186664
AABR07001923.1	78.1276	0.833034	0.246475	3.37979	0.000725421	0.0189187
Fam83b	16.5125	-1.94454	0.575443	-3.37921	0.000726949	0.0189187
AABR07066567.1	10.5665	2.80669	0.830498	3.37953	0.000726112	0.0189187
Mtpn	658.711	-0.461648	0.136654	-3.37823	0.000729535	0.0189546
RGD1563941	292.534	0.602638	0.178469	3.37671	0.000733581	0.0190197
Medag	19.5867	-1.67341	0.495622	-3.37638	0.000734461	0.0190197
Slc25a25	4140.8	-1.45342	0.430541	-3.37579	0.000736031	0.0190291
LOC689574	3894.72	0.411474	0.121983	3.3732	0.000743008	0.0191195
Krt19	218.682	-1.08195	0.320683	-3.37389	0.00074113	0.0191195
Uba52	7914.95	0.456207	0.135247	3.37313	0.000743177	0.0191195
Ip6k2	921.37	0.874459	0.259463	3.37026	0.000750964	0.0192882
Txnip	2262.68	0.628702	0.18665	3.36834	0.000756216	0.0193599
Ip6k1	341.709	-0.452521	0.134333	-3.36865	0.000755369	0.0193599
Ube3d	64.0779	0.957597	0.284394	3.36715	0.000759492	0.0194121
Aknad1	202.813	0.723941	0.215105	3.36552	0.000764	0.0194794
Fam213a	1574.06	0.522331	0.155211	3.3653	0.000764601	0.0194794
AABR07044080.2	263.926	-0.529638	0.157505	-3.36268	0.000771898	0.0196334
Fabp2	93.2137	-1.48438	0.442099	-3.35757	0.000786308	0.0198735
Ndufa4	3436.81	0.425932	0.126892	3.35665	0.00078892	0.0198735
AABR07063704.1	6.56589	3.2367	0.964163	3.357	0.000787922	0.0198735
Rufy3	902.961	0.305861	0.0911135	3.35692	0.000788159	0.0198735
St6gal1	10169.3	0.372994	0.111058	3.35855	0.000783531	0.0198735
AABR07044551.1	24.6361	1.4468	0.430857	3.35795	0.000785237	0.0198735
MGC116121	192.776	-0.592207	0.176554	-3.35426	0.000795785	0.0200143
Tmem150c	130.864	0.706174	0.21058	3.35347	0.00079806	0.0200395
Tnfrsf1a	2117.32	-0.358284	0.106876	-3.35232	0.000801368	0.0200585
AABR07024468.1	6.51619	2.86527	0.854632	3.35264	0.000800443	0.0200585
Frrs1	515.257	-0.46413	0.138489	-3.35139	0.000804059	0.0200938
Gsta2	2674.91	0.701501	0.209496	3.34852	0.000812436	0.0202709
Amacr	5032.66	0.670132	0.20026	3.3463	0.000818974	0.0204017
LOC100365958	1612.75	-0.865066	0.258569	-3.34559	0.000821083	0.0204218
Gng2	124.229	0.521763	0.155999	3.34464	0.000823884	0.0204591
Pmf1	178.755	0.640228	0.191503	3.34317	0.000828268	0.0205356
B4galt6	211.614	0.739471	0.221239	3.3424	0.000830566	0.0205601
Spata3	8.6769	-3.0729	0.919531	-3.34181	0.00083233	0.0205714
RT1-DMa	13.274	-1.92465	0.576329	-3.33949	0.000839312	0.0207114
Cenpj	406.188	0.580533	0.173883	3.33865	0.000841859	0.0207417
Tpcn1	2141.61	0.401052	0.1202	3.33654	0.000848292	0.0208675
Galnt12	30.3403	-1.67318	0.501997	-3.33305	0.000859003	0.021065
Abcc4	130.284	-0.758435	0.227522	-3.33346	0.000857734	0.021065
Tfb1m	144.624	0.766299	0.230099	3.3303	0.000867514	0.0212075
Iars2	1054.06	-0.286043	0.0858882	-3.33041	0.000867194	0.0212075
Kif1a	15.5237	-2.60157	0.781319	-3.32972	0.000869341	0.0212192
Isca2	389.768	0.450326	0.135346	3.32722	0.000877183	0.0213774
Rpl18	3920.08	0.353297	0.106296	3.3237	0.000888302	0.0215815
Aamp	2809.95	-0.256688	0.077227	-3.32381	0.000887961	0.0215815
Hook1	478.438	-0.434066	0.130633	-3.32279	0.000891225	0.0216191
Ppp2ca	178.372	-0.550819	0.165885	-3.32048	0.00089862	0.0217649
Iqcb1	117.332	0.647527	0.195127	3.31849	0.000905069	0.0218874
Iqcc	99.9263	0.707085	0.213319	3.31468	0.000917484	0.0221535
AABR07024473.2	9.13616	2.51323	0.758426	3.31374	0.000920576	0.0221941
Unc5cl	342.056	-0.861592	0.26008	-3.3128	0.000923667	0.0222345
Dmgdh	6871.08	0.476724	0.143936	3.31205	0.000926144	0.02226
Rpl5	9077.61	0.34757	0.10497	3.31113	0.000929203	0.0222654
AABR07034833.1	3.43641	4.8353	1.46015	3.31152	0.000927914	0.0222654
AABR07058831.1	132.487	-0.710276	0.214647	-3.30904	0.000936162	0.0223981
C3	252899	0.404832	0.122491	3.305	0.00094978	0.0226894
Cnnm4	234.804	-0.568609	0.172182	-3.30236	0.000958733	0.0228685
Tuft1	53.608	0.957883	0.290238	3.30033	0.0009657	0.022965
Scyl2	656.781	0.335992	0.101802	3.30046	0.000965268	0.022965
Clec1a	81.3936	0.962368	0.292068	3.29502	0.000984149	0.0233683
Acnat1	45.6808	-1.31666	0.399668	-3.2944	0.000986331	0.0233848
Rab32	398.638	-0.495645	0.150501	-3.29331	0.000990159	0.0234402
AC105662.2	13.1502	-3.41804	1.03892	-3.29001	0.00100185	0.0236814
RF00017	109.709	1.26328	0.384132	3.28865	0.00100669	0.02376
Cnp	383.155	-0.451657	0.137371	-3.28786	0.00100952	0.023791
Nipsnap3b	1375.69	-0.364748	0.110955	-3.28736	0.00101132	0.0237977
Cpsf4	485.309	0.359957	0.109553	3.2857	0.00101728	0.0239023
AC114343.1	1925.37	0.628089	0.191253	3.28407	0.00102318	0.0240051
Pank2	260.312	0.430266	0.131066	3.28281	0.00102778	0.0240769
Hs2st1	537	-0.442427	0.134799	-3.28214	0.00103024	0.0240987
Stat6	372.993	-0.534058	0.162759	-3.28128	0.00103337	0.024136
Cpxm2	29.5607	-2.50354	0.763149	-3.28054	0.0010361	0.0241371
LOC100910979	8.39463	-4.40917	1.34408	-3.28043	0.00103649	0.0241371
AABR07035796.1	44.5587	1.12633	0.343771	3.2764	0.0010514	0.024448
Cox6b1	2756.41	0.290063	0.0885662	3.27509	0.00105627	0.0245135
Esm1	29.5862	-2.42797	0.741408	-3.27481	0.00105733	0.0245135
Pbx2	877.182	0.432468	0.132138	3.27284	0.00106473	0.0246488
Myd88	620.21	0.442204	0.135192	3.27093	0.00107194	0.0247791
Twnk	640.304	0.422747	0.129472	3.26517	0.00109399	0.0252147
Dusp16	209.725	-0.544143	0.166645	-3.26528	0.00109357	0.0252147
Zfp329	68.0988	0.800218	0.24517	3.26393	0.00109877	0.0252879
Rps24	4867.58	0.392185	0.120174	3.26348	0.00110052	0.025291
Abcb11	10185.6	0.452791	0.13884	3.26124	0.00110925	0.0254544
Evc	149.698	-0.884244	0.271333	-3.25889	0.00111848	0.0255916
Ddc	1256.48	-0.694254	0.213023	-3.25905	0.00111786	0.0255916
Tnc	100.092	-1.49353	0.458483	-3.25755	0.00112378	0.0256607
AABR07068590.2	3.13541	5.43238	1.66775	3.2573	0.00112477	0.0256607
P2ry2	1147.99	-0.479044	0.147147	-3.25554	0.00113177	0.0257457
LOC108352650	5486.41	0.381236	0.117095	3.25579	0.00113078	0.0257457
Rps3	5205.97	0.282097	0.0866767	3.25459	0.00113555	0.0257944
Krt20	199.075	-1.70735	0.524684	-3.25404	0.00113775	0.025807
Impdh1	202.643	-0.543393	0.16706	-3.25268	0.00114321	0.0258191
Actn1	774.264	-0.36713	0.11285	-3.25326	0.00114087	0.0258191
Il13ra1	168.918	0.891099	0.273933	3.25298	0.00114202	0.0258191
Slx4ip	90.7367	0.753723	0.231821	3.25132	0.00114872	0.0258848
Sema7a	18.842	-1.61182	0.49577	-3.25115	0.00114941	0.0258848
Mboat1	154.883	-0.978011	0.300968	-3.24955	0.00115587	0.0259851
Mt-co2	363757	0.629264	0.193665	3.24923	0.00115717	0.0259851
AABR07068316.1	839.34	-0.635878	0.19573	-3.24876	0.00115911	0.0259915
Msln	578.743	-1.40043	0.431144	-3.24817	0.0011615	0.0260081
Krt18	5686.08	-0.431955	0.133051	-3.24653	0.00116822	0.0261212
Cdc14a	95.8508	-0.690108	0.21289	-3.24161	0.00118856	0.0265383
Fcer1g	940.788	0.492797	0.152141	3.23908	0.00119918	0.0267375
Cyp2j4	1294.15	-0.549226	0.169648	-3.23745	0.00120602	0.026852
Mkl1	275.264	-0.42013	0.129898	-3.23431	0.00121936	0.0271105
Glis2	268.027	-0.894391	0.276685	-3.23252	0.00122702	0.0272424
Tbc1d23	430.095	0.483842	0.149804	3.22984	0.00123859	0.0274604
Tmem220	79.5389	-0.780467	0.242092	-3.22384	0.00126482	0.0280025
Aup1	3147.47	0.39722	0.123254	3.22278	0.00126955	0.0280676
Slc35e2b	334.374	-0.547759	0.170053	-3.2211	0.00127699	0.0281924
Tp53i11	604.868	0.385579	0.119719	3.22069	0.00127883	0.0281935
Abraxas1	144.208	0.554659	0.172334	3.21851	0.00128857	0.0283685
Alkbh6	12.7636	1.81588	0.565149	3.2131	0.00131311	0.0288683
RGD1309621	434.831	0.548092	0.170622	3.21232	0.0013167	0.0289066
Birc2	727.224	-0.460021	0.14325	-3.21132	0.00132128	0.0289669
Gria3	169.117	1.07739	0.335737	3.20904	0.0013318	0.0291175
Gja1	632.487	-0.726782	0.226481	-3.20902	0.00133186	0.0291175
Snrnp70	5076.56	0.385212	0.120162	3.20578	0.00134697	0.0293126
Rps4x	7851.14	0.346298	0.108032	3.20551	0.00134824	0.0293126
Zfp593	122.079	0.558295	0.174114	3.20649	0.00134363	0.0293126
Usp16	712.111	0.339854	0.106016	3.20568	0.00134742	0.0293126
AC115666.1	14.1454	1.44688	0.451445	3.20499	0.00135065	0.0293245
AABR07004269.3	62.4146	-0.839889	0.262152	-3.20383	0.00135614	0.0294029
Icam2	232.069	0.438343	0.13687	3.20261	0.00136187	0.0294865
Cldn3	2043.48	-0.567901	0.177516	-3.19915	0.00137831	0.0298015
Pacsin3	856.979	-0.398099	0.124471	-3.19833	0.00138228	0.0298461
Smyd5	250.269	0.600775	0.188002	3.19557	0.00139555	0.0299273
Cry1	183.127	0.736979	0.230642	3.19534	0.00139668	0.0299273
Ly6al	22.7713	4.99819	1.56419	3.19538	0.00139648	0.0299273
Apoa2	9618.27	0.799675	0.250202	3.19612	0.00139288	0.0299273
Plcxd2	53.2559	-1.06156	0.332116	-3.19636	0.00139172	0.0299273
Crispld2	67.5067	-1.15396	0.361157	-3.19518	0.00139746	0.0299273
Rilp	240.518	-0.641224	0.200733	-3.19441	0.00140117	0.029966
Tti1	583.514	-0.407189	0.127566	-3.192	0.00141293	0.0301764
AABR07057108.1	11.446	4.27127	1.33868	3.19066	0.00141947	0.0302492
Drg2	230.657	-0.503283	0.157763	-3.19013	0.00142211	0.0302492
AABR07017145.1	27.2219	-3.58452	1.12351	-3.19047	0.00142039	0.0302492
AABR07044635.1	15.873	-2.19952	0.690314	-3.18626	0.00144124	0.0306147
AABR07001210.1	8.40625	4.06709	1.27704	3.18478	0.00144866	0.0307237
AABR07061378.1	17.7901	1.46295	0.459403	3.18445	0.00145028	0.0307237
Cdk11b	965.455	0.397908	0.125034	3.18241	0.00146057	0.0308999
Xylb	6390.82	0.382273	0.120231	3.17948	0.0014754	0.0311717
Tpm1	2242.04	-0.506825	0.15947	-3.17818	0.00148203	0.0312699
Pdcl3	345.782	0.447099	0.140735	3.17689	0.00148865	0.0313673
Diaph1	1940.28	-0.220245	0.0693589	-3.17543	0.00149614	0.0314409
Lsm2	236.144	0.759876	0.239279	3.1757	0.00149477	0.0314409
Rnf214	201.749	-0.467772	0.1475	-3.17134	0.0015174	0.0318451
Armh3	156.845	-0.556892	0.175718	-3.16924	0.0015284	0.0319532
Gimd1	26.3486	-2.60382	0.821604	-3.16919	0.00152865	0.0319532
Tradd	180.873	-0.640627	0.202139	-3.16925	0.00152835	0.0319532
Arel1	589.776	-0.353128	0.111477	-3.16772	0.0015364	0.0320727
Rpl27	2958.97	0.33749	0.106569	3.16686	0.00154094	0.0320929
Nudt7	246.651	0.564768	0.178342	3.16676	0.00154146	0.0320929
Tead4	128.864	-0.686655	0.216937	-3.16523	0.0015496	0.0322199
C5ar2	93.7775	-0.834448	0.263987	-3.16094	0.0015726	0.0326548
Eml2	240.39	-0.471133	0.149124	-3.15934	0.00158128	0.0326625
Noc2l	727.026	0.3336	0.105586	3.1595	0.00158041	0.0326625
AABR07065438.1	414.627	-0.417395	0.132085	-3.16004	0.0015775	0.0326625
Sugt1	410.601	0.443624	0.140387	3.16	0.00157768	0.0326625
Ppig	973.602	0.523515	0.165749	3.15849	0.00158591	0.0327124
Sppl2a	1028.48	0.498066	0.157709	3.15813	0.00158786	0.0327124
Tgm2	3540.89	-0.364016	0.115467	-3.15255	0.0016185	0.0333001
Slc4a5	6.92379	2.46298	0.781492	3.15164	0.00162358	0.0333201
LOC100362980	397.45	0.338717	0.107474	3.15161	0.00162372	0.0333201
Lynx1	145.255	-0.696067	0.220918	-3.1508	0.00162826	0.0333697
Naca	5569.82	0.321391	0.102028	3.15003	0.00163255	0.0334142
Dut	331.112	0.634951	0.201687	3.14821	0.00164275	0.0335436
Ankrd49	356.134	0.41519	0.1319	3.14776	0.00164528	0.0335436
Cpn2	2991.06	-0.317214	0.10077	-3.1479	0.0016445	0.0335436
Cdc26	359.376	0.356245	0.11324	3.14593	0.00165559	0.0336721
Clcn4	1579.33	-0.372805	0.118506	-3.14588	0.00165586	0.0336721
Mtmr11	161.834	-0.711058	0.226114	-3.14468	0.00166266	0.0337053
Gstz1	14035.3	0.454698	0.144575	3.14506	0.00166056	0.0337053
Neu1	708.041	-0.512136	0.162869	-3.14446	0.00166393	0.0337053
Entpd8	677.491	-0.995259	0.316571	-3.14388	0.00166727	0.0337294
AABR07052585.2	9.50693	-1.89988	0.604812	-3.14128	0.00168213	0.0339864
Pkm	288.993	-0.520835	0.165969	-3.13814	0.00170023	0.034308
Tmem9	437.323	0.476958	0.152037	3.13711	0.00170624	0.0343851
LOC500684	13.376	1.42283	0.453701	3.13605	0.00171239	0.0344649
Scn4b	14.2747	-3.20294	1.02148	-3.13558	0.00171517	0.0344766
Tfap4	103.875	0.715182	0.228557	3.12911	0.00175335	0.0351991
Sgf29	330.201	0.522668	0.167108	3.12773	0.00176162	0.0353065
Adh7	297.448	1.10531	0.35342	3.12747	0.00176319	0.0353065
Ptgs1	843.801	0.348458	0.111464	3.1262	0.00177082	0.0353691
C8b	11807.5	0.276387	0.0884083	3.12625	0.0017705	0.0353691
Ptpn18	180.945	0.584351	0.186961	3.12553	0.00177486	0.0354048
Gjc2	37.3211	-1.42122	0.454992	-3.12361	0.0017865	0.0355919
AABR07025010.1	49.9776	1.21599	0.389431	3.12247	0.00179338	0.0356837
Pet100	666.074	0.36558	0.117116	3.12152	0.00179922	0.0357547
AABR07065118.1	14.1193	2.17092	0.695872	3.11972	0.00181024	0.0359282
Zpbp2	65.9376	0.776656	0.24901	3.11898	0.00181481	0.0359734
Fbxo34	282.401	-0.428014	0.137305	-3.11726	0.00182543	0.0361385
Ap3s2	673.917	0.39853	0.127878	3.11649	0.00183015	0.0361863
LOC102552527	94.8726	0.645553	0.207203	3.11555	0.001836	0.0362563
Prob1	25.8157	-1.2494	0.401126	-3.11474	0.00184107	0.0363108
Klkb1	6869.63	0.522319	0.167891	3.11105	0.00186423	0.0367215
Galm	2069.91	0.334828	0.107712	3.10857	0.00187998	0.0369855
Cpa3	39.6968	-1.48437	0.477826	-3.10651	0.00189313	0.0371976
Slc45a4	259.26	-0.501694	0.161552	-3.10546	0.00189985	0.0372831
Ang2	3.2071	4.53708	1.4619	3.10354	0.00191219	0.0374784
Cfb	34814.6	0.35192	0.113414	3.10297	0.0019159	0.0375045
Ncs1	17.8233	-1.28446	0.414125	-3.10162	0.00192468	0.0376293
Lect2	5768.47	0.544067	0.175456	3.10088	0.00192946	0.037676
Cdcp1	37.5083	-1.52651	0.492539	-3.09927	0.00193996	0.037834
Ist1	480.059	-0.341456	0.110204	-3.09839	0.00194572	0.0378994
Hinfp	176.587	0.497831	0.160746	3.09701	0.00195483	0.0380297
Rad9a	130.408	0.472653	0.152671	3.0959	0.00196217	0.038105
Klhl7	303.22	-0.47441	0.153285	-3.09496	0.0019684	0.038105
Mutyh	119.879	-0.615728	0.198925	-3.09527	0.00196633	0.038105
Arid3a	100.112	0.841598	0.271895	3.0953	0.00196611	0.038105
Emp1	384.449	-0.823987	0.266297	-3.09424	0.00197315	0.03815
Slc35c2	2084.93	-1.5978	0.51666	-3.09255	0.00198442	0.0382737
Sec14l2	2611.01	0.82193	0.26576	3.09275	0.00198311	0.0382737
AABR07002774.1	49.2666	0.862957	0.27914	3.09149	0.00199154	0.038364
March8	1700.81	-0.230244	0.0745018	-3.09045	0.00199855	0.038452
Tpst1	1398.44	-0.3828	0.123884	-3.08999	0.0020016	0.0384636
Hmgn5b	102.618	0.881953	0.285571	3.08839	0.00201247	0.0386033
Tes	195.512	-0.862094	0.279158	-3.08819	0.00201379	0.0386033
Mettl21a	91.9192	0.619471	0.200677	3.08691	0.0020225	0.0387231
Tmem60	187.008	0.422881	0.137142	3.08353	0.00204558	0.0391175
Spopl	63.7909	-0.712861	0.231219	-3.08306	0.00204885	0.0391322
Kank1	859.763	-0.592924	0.192481	-3.08042	0.00206706	0.0394322
AABR07064719.1	202.807	0.463107	0.150398	3.07922	0.00207545	0.0395443
Wdr46	606.051	0.52894	0.171809	3.07865	0.00207943	0.039572
Atxn1	91.9592	-0.683806	0.222159	-3.078	0.00208397	0.0396105
Sestd1	117.214	-0.900634	0.29283	-3.07562	0.00210068	0.0396771
Rtfdc1	1335.02	0.2976	0.0967135	3.07713	0.00209006	0.0396771
Ctnnal1	612.71	0.338872	0.110182	3.07558	0.00210095	0.0396771
Nol12	185.203	0.460451	0.14971	3.07563	0.00210061	0.0396771
Map4	2005.49	-0.326784	0.106237	-3.07599	0.00209803	0.0396771
Hspa1a	21.8872	-2.43608	0.792133	-3.07534	0.00210261	0.0396771
Sebox	42.97	-0.847904	0.275814	-3.07418	0.00211079	0.039736
LOC100910669	13.4658	-1.79121	0.582641	-3.07429	0.00211007	0.039736
Lamc1	846.43	-0.473714	0.154154	-3.07298	0.00211931	0.0398486
Nab2	166.074	-0.798505	0.259955	-3.0717	0.00212844	0.0399725
Fam198b	220.041	-0.608956	0.198282	-3.07117	0.00213224	0.0399961
Gmps	606.259	0.362758	0.118219	3.06853	0.00215115	0.0403026
Atp1a1	5510.75	-0.310203	0.10112	-3.06767	0.00215736	0.0403708
Fau	3340.77	0.423144	0.137989	3.06652	0.00216569	0.0404786
Flrt3	99.3815	-1.29697	0.423467	-3.06275	0.00219314	0.0408487
Cnot9	635.213	0.365121	0.119214	3.06273	0.00219329	0.0408487
Spata2L	371.213	0.900046	0.293858	3.06286	0.00219233	0.0408487
Tmem168	182.646	-0.566406	0.184974	-3.06208	0.00219803	0.0408885
AABR07051376.1	74.084	-0.741528	0.242252	-3.06097	0.0022062	0.0409921
Fcmr	24.6658	-1.5138	0.495011	-3.05812	0.0022273	0.0413352
Tap2	75.9226	-0.936255	0.306332	-3.05634	0.00224055	0.0415321
Actb	9143.72	-0.336231	0.110135	-3.05289	0.00226647	0.0419631
Gramd4	535.597	-0.441017	0.144495	-3.05213	0.00227221	0.0420199
Dlk1	15.0956	1.54482	0.506399	3.05059	0.00228393	0.0421869
Acy3	630.505	-0.553822	0.181638	-3.04904	0.00229573	0.0423551
LOC501317	3.0585	4.6683	1.5314	3.04838	0.00230075	0.042398
Synpo	180.874	-0.741504	0.243413	-3.04627	0.00231697	0.042647
Kctd15	47.9871	-1.00252	0.329155	-3.04575	0.00232104	0.0426719
Zfp385a	1100.26	0.727533	0.238943	3.04479	0.0023284	0.0427571
Txndc12	1270.88	0.322148	0.105907	3.0418	0.0023517	0.0430875
Tmem254	379.936	0.454564	0.14944	3.04178	0.00235187	0.0430875
Sec62	2271.36	0.328197	0.107956	3.04009	0.00236508	0.0432791
Tubb2b	15.0052	-1.6137	0.531049	-3.0387	0.002376	0.0434283
Eif1ad	506.404	0.40251	0.132612	3.03524	0.00240347	0.0438424
Penk	18.473	-1.89946	0.625894	-3.03479	0.00240702	0.0438424
Eef1b2	2682.78	0.355306	0.117067	3.03508	0.00240472	0.0438424
Patj	473.78	-0.392082	0.129243	-3.03367	0.00241595	0.0439033
Ddah2	68.2785	0.705115	0.232408	3.03396	0.0024137	0.0439033
LOC100360413	205.257	0.643456	0.212188	3.03248	0.00242551	0.0440261
AABR07071395.1	11.2654	-2.13845	0.705733	-3.03011	0.00244468	0.044316
Plod3	662.935	-0.329487	0.108749	-3.0298	0.00244712	0.044316
Upp1	108.929	-0.885174	0.292459	-3.02666	0.00247275	0.0447286
Ryr1	56.8673	-0.915712	0.302664	-3.02551	0.00248217	0.0448473
Tigd2	118.893	0.674473	0.223206	3.02175	0.00251319	0.0452518
Ppl	151.997	-0.708168	0.234335	-3.02203	0.00251086	0.0452518
Kcnk5	434.174	-0.973771	0.322234	-3.02194	0.00251161	0.0452518
RGD1566359	56.4191	-0.9375	0.310345	-3.02083	0.00252082	0.0453372
Cyp4a1	3714.62	0.807946	0.267572	3.01954	0.00253155	0.0454782
AABR07051190.1	88.5062	0.816057	0.270428	3.01765	0.00254746	0.0457117
Ercc2	278.641	0.42916	0.142253	3.01688	0.00255391	0.0457753
Sptbn1	2011.77	-0.435276	0.144312	-3.01622	0.00255945	0.0458224
Igsf6	140.239	0.513061	0.170141	3.0155	0.00256554	0.045879
Eif2ak2	584.356	0.470846	0.156462	3.00933	0.00261824	0.0467684
Nrap	9.09385	-1.93113	0.642538	-3.00547	0.00265172	0.0470907
Ywhaq	1654.62	-0.33857	0.112675	-3.00483	0.00265726	0.0470907
Plet1	62.6054	-1.56747	0.521539	-3.00547	0.00265174	0.0470907
Mlh1	191.772	0.713454	0.237401	3.00526	0.00265351	0.0470907
Odr4	154.163	0.51893	0.172616	3.00626	0.00264482	0.0470907
Def8	1197.48	0.414012	0.13778	3.00488	0.00265688	0.0470907
Ier3	475.936	-0.655995	0.218164	-3.00688	0.0026394	0.0470907
Rps15	3903.09	0.367283	0.1223	3.00313	0.00267216	0.0473014
Paqr8	32.8656	-1.18823	0.395884	-3.00146	0.00268689	0.047493
Mgrn1	661.086	-0.37945	0.126432	-3.00122	0.00268903	0.047493
Sept5	40.6778	-0.852103	0.283968	-3.0007	0.00269356	0.0475197
Crp	71886.5	-0.747317	0.249107	-2.99999	0.00269991	0.0475596
Ywhae	5569.05	0.229264	0.0764273	2.99977	0.00270187	0.0475596
LOC108348048	10.5501	-2.27811	0.760433	-2.99581	0.00273714	0.0481266
Cttnbp2	126.516	0.638378	0.213378	2.99177	0.00277369	0.0487147
Mfsd12	84.0545	-0.726886	0.243052	-2.99066	0.00278371	0.048836
Ybx3	1110.07	0.379951	0.127091	2.98959	0.00279348	0.0489031
Tgfbr2	977.05	-0.429937	0.143813	-2.98956	0.00279375	0.0489031
Prss23	733.345	-0.535934	0.179324	-2.98863	0.0028023	0.0489438
Npr1	573.615	0.472237	0.158003	2.98878	0.0028009	0.0489438
AABR07060519.1	3.48449	-3.30694	1.10723	-2.98668	0.00282029	0.04904
Sspo	23.6681	-1.62442	0.543757	-2.98741	0.00281356	0.04904
Fam83f	17.3907	-1.74372	0.583831	-2.98669	0.00282014	0.04904
Aqp9	3872.8	-0.381308	0.127667	-2.98675	0.00281963	0.04904
Klrd1	14.3116	-1.42238	0.476347	-2.98603	0.00282628	0.0490899
Cyp2c22	26450.5	0.601779	0.20172	2.98323	0.00285223	0.0494314
St6galnac4	452.363	-0.833208	0.27927	-2.98352	0.00284956	0.0494314
Adamts12	426.18	0.442438	0.148368	2.98204	0.00286337	0.0495697
Pot1b	68.1945	0.827726	0.277661	2.98107	0.00287241	0.0496716
Mapk1ip1	300.787	0.471836	0.158345	2.9798	0.00288439	0.0498093
RGD1563601	104.196	-1.20112	0.403123	-2.97955	0.00288671	0.0498093
Il1a	149.649	0.662601	0.222514	2.9778	0.0029033	0.0500405
Glb1	780.192	-0.263367	0.0884831	-2.97647	0.00291587	0.0502021
Cep76	65.9647	0.833945	0.28032	2.97498	0.0029301	0.0503919
Sod3	823.938	0.632925	0.212821	2.97397	0.00293971	0.050502
Nob1	733.002	0.461028	0.155233	2.96991	0.00297884	0.0511184
Cd109	33.1793	-1.17607	0.396093	-2.96918	0.002986	0.0511853
Mrpl18	477.17	0.43402	0.146197	2.96873	0.00299029	0.0512029
Atp6v1b2	736.947	-0.378793	0.127634	-2.9678	0.00299937	0.0513026
Psat1	488.285	1.26676	0.426883	2.96746	0.00300267	0.0513033
Pole3	493.47	0.353961	0.11938	2.96499	0.00302691	0.0516011
LOC100911515	730.966	-0.606525	0.20458	-2.96473	0.00302951	0.0516011
Rtn4rl1	334.64	-0.574479	0.193774	-2.96468	0.00302995	0.0516011
Arhgap18	306.978	0.575147	0.194084	2.96339	0.00304268	0.0517618
AABR07030156.2	333.785	0.488775	0.164973	2.96275	0.00304903	0.0518137
Nt5c	107.142	-0.618797	0.208886	-2.96237	0.00305281	0.051822
Uap1l1	238.922	-0.657901	0.222179	-2.96113	0.00306516	0.0519754
Tmem143	216.449	-0.481618	0.162697	-2.96021	0.00307428	0.0520572
Cdkn2b	55.3127	-1.62578	0.549314	-2.95965	0.00307992	0.0520572
Eqtn	3.50698	-4.33425	1.46435	-2.95985	0.00307785	0.0520572
Klf5	39.248	-1.51849	0.513142	-2.95921	0.00308429	0.0520751
AABR07006311.1	8.58269	2.37622	0.803169	2.95855	0.00309087	0.0521302
F12	14274	-0.234148	0.0792788	-2.95347	0.00314218	0.0529389
Dlgap1	14.3152	-1.79337	0.607551	-2.95181	0.00315922	0.0531689
Rps5	4146.99	0.373505	0.126686	2.94828	0.00319543	0.0536061
AABR07029742.1	124.332	0.628659	0.213223	2.94836	0.00319466	0.0536061
RGD1560492	9.44068	1.91815	0.650537	2.94857	0.0031925	0.0536061
Glud1	21526.1	0.409635	0.138994	2.94715	0.00320716	0.0537455
Thada	195.028	0.550702	0.186894	2.9466	0.00321286	0.0537838
Zfp267	107.664	0.639405	0.217135	2.94473	0.00323233	0.0540007
Slc7a15	7.25095	-2.60388	0.884261	-2.9447	0.00323269	0.0540007
AABR07050652.1	38.2139	-1.16801	0.396759	-2.94389	0.00324118	0.054085
Camk2n2	13.123	-3.80176	1.29211	-2.94228	0.00325808	0.0543094
Itgb6	57.6096	-1.34199	0.456621	-2.93896	0.0032932	0.0548367
LOC100363537	400.101	0.734802	0.250108	2.93794	0.00330406	0.0549593
Tob2	302.701	-0.972197	0.331122	-2.93607	0.00332398	0.0552321
Rxfp1	8.4972	-1.982	0.675131	-2.93572	0.0033277	0.0552356
AABR07021492.1	5.47706	4.4252	1.50762	2.93522	0.00333311	0.0552671
F9	10940.9	0.380156	0.129571	2.93396	0.00334673	0.0554343
AABR07002969.1	130.496	-0.60445	0.206097	-2.93284	0.00335874	0.0555163
Spp1	548.614	-1.34227	0.457666	-2.93286	0.00335853	0.0555163
Tmed10	2380.76	0.29317	0.100125	2.92805	0.00341101	0.056321
Ocstamp	50.7423	-2.38632	0.815763	-2.92526	0.00344165	0.0567331
LOC300249	692.119	0.378422	0.129369	2.92512	0.00344318	0.0567331
Rps3a	6551.93	0.345065	0.118119	2.92133	0.00348538	0.0573628
AABR07029596.1	39.5234	-1.19188	0.408032	-2.92104	0.0034887	0.0573628
Rps15a	3663.58	0.383422	0.131398	2.91803	0.00352249	0.057858
Fbln5	335.706	0.59612	0.20434	2.91729	0.00353087	0.0579349
Ifi47	1256.07	0.830891	0.28491	2.91632	0.00354182	0.058054
Batf	16.2889	1.23397	0.42326	2.9154	0.00355228	0.0581254
Nudt12	410.679	0.428216	0.146886	2.91529	0.00355357	0.0581254
Gpam	1709.8	-0.544274	0.186739	-2.91463	0.0035611	0.0581396
Rtf1	809.499	0.231222	0.079341	2.91428	0.00356514	0.0581396
Ncoa4	2690.05	0.47931	0.164472	2.91424	0.00356553	0.0581396
Gnl2	681.339	0.366775	0.125919	2.91278	0.00358224	0.0583515
Ifrd1	1131.3	-0.530206	0.182155	-2.91075	0.00360566	0.0586722
Gapt	42.9107	0.84423	0.290147	2.90966	0.00361825	0.0588161
AABR07057683.1	84.2269	0.592374	0.203653	2.90875	0.00362879	0.0589267
Prr15l	40.572	-1.28713	0.442907	-2.90609	0.00365977	0.0592461
AC106292.2	120.883	-0.795875	0.273814	-2.90662	0.00365352	0.0592461
Mtus2	14.1696	-1.22116	0.420173	-2.90632	0.00365702	0.0592461
Ndufa12	272.876	0.559147	0.192486	2.90487	0.00367409	0.0593557
Clk4	654.52	0.473675	0.163049	2.90511	0.00367123	0.0593557
Aimp1	378.128	0.337006	0.116069	2.90348	0.00369039	0.0593749
Bmp7	124.223	-1.05988	0.36494	-2.90425	0.00368138	0.0593749
Cyb5r1	118.55	-0.579403	0.199545	-2.90362	0.00368872	0.0593749
Anapc7	321.692	0.32356	0.111418	2.90402	0.00368402	0.0593749
Gabrp	86.7994	-1.81934	0.627434	-2.89965	0.0037358	0.060044
Nnat	104.816	-1.66071	0.572978	-2.89838	0.0037509	0.0601871
Selenoi	594.79	0.540545	0.186506	2.89826	0.00375236	0.0601871
Ppp1r13l	78.1339	-0.896969	0.30952	-2.89794	0.00375625	0.060188
Pwp1	317.84	0.38271	0.132149	2.89606	0.00377882	0.060488
Sphk2	970.132	-0.361323	0.124836	-2.89438	0.00379905	0.0607175
Phf20	211.062	-0.571178	0.19735	-2.89423	0.00380088	0.0607175
Taco1	96.8972	-0.736883	0.254707	-2.89306	0.00381511	0.060883
Rrp1	512.463	0.359286	0.124232	2.89205	0.00382738	0.0610168
Pbdc1	352.407	0.507422	0.175528	2.89083	0.0038422	0.061191
Spock2	41.3708	-1.37461	0.475702	-2.88965	0.00385674	0.0613604
Ckb	438.21	-0.468665	0.162453	-2.88493	0.00391502	0.062077
Deptor	209.346	-0.757742	0.262674	-2.88472	0.00391758	0.062077
Supt4h1	589.434	0.309523	0.107272	2.8854	0.00390914	0.062077
Mxra7	18.0785	-1.11482	0.386413	-2.88505	0.00391349	0.062077
LOC103690016	13.7936	2.125	0.737123	2.88283	0.00394121	0.0623258
Tlr2	81.6388	0.624954	0.216781	2.88289	0.00394051	0.0623258
AABR07044404.1	186.074	0.900458	0.312457	2.88186	0.00395336	0.0624551
Ppm1g	1198.76	0.301461	0.104673	2.88002	0.00397649	0.0627575
Cox15	66.1859	-0.705092	0.244986	-2.87809	0.00400093	0.0630798
Tex36	17.6624	-2.30321	0.80058	-2.87693	0.00401567	0.0632488
Npm1	2943.93	0.329946	0.114724	2.87599	0.00402763	0.0633737
Eif4e2	836.506	0.309454	0.107644	2.87478	0.00404308	0.0635532
AABR07062183.1	20.3881	-1.21286	0.422207	-2.87267	0.00407013	0.0638893
Crls1	973.606	0.457819	0.159381	2.87248	0.00407259	0.0638893
Tuba1a	319.442	-0.612066	0.213201	-2.87083	0.00409391	0.0640067
Tmem169	7.81741	-2.8656	0.998243	-2.87064	0.00409637	0.0640067
Ndst2	7.86787	1.75626	0.611708	2.87107	0.00409088	0.0640067
Gatc	566.147	0.326639	0.113784	2.87071	0.00409557	0.0640067
Casp2	300.546	0.324101	0.112971	2.86889	0.00411915	0.0641714
Birc3	144.472	-0.592458	0.206468	-2.86949	0.00411133	0.0641714
Igsf11	589.251	0.595878	0.207685	2.86914	0.00411589	0.0641714
Crk	275.952	-0.43452	0.151489	-2.86832	0.00412653	0.0642226
Pi4k2a	359.348	-0.437941	0.152716	-2.86768	0.00413499	0.0642907
Mier2	142.417	-0.570267	0.198904	-2.86704	0.00414328	0.064356
Clec4m	26.0843	1.60585	0.560187	2.86663	0.00414872	0.0643769
Rps8	5491.67	0.35486	0.123875	2.86465	0.00417469	0.064716
Clpp	567.401	0.419577	0.146535	2.86333	0.00419209	0.0648944
Kcnk1	26.0448	-1.18939	0.415458	-2.86284	0.00419859	0.0648944
Prmt2	82.0499	-0.580303	0.2027	-2.86287	0.0041982	0.0648944
Clip2	147.833	-0.440836	0.154074	-2.86119	0.00422048	0.0651688
LOC108348215	38.7132	1.39254	0.486788	2.86067	0.00422742	0.0651868
Ankrd26	143.317	0.477488	0.166931	2.8604	0.00423109	0.0651868
Ecpas	1765.02	0.22701	0.0793829	2.85969	0.00424061	0.0651868
Timp1	253.499	-0.676788	0.236725	-2.85896	0.0042503	0.0651868
Utp23	105.499	0.509825	0.178327	2.85893	0.00425068	0.0651868
Epha3	44.8363	-1.39129	0.486616	-2.85912	0.00424813	0.0651868
Glg1	1457.49	-0.193679	0.067717	-2.86012	0.00423476	0.0651868
Fcna	1309.11	0.433127	0.151532	2.85831	0.00425905	0.0652514
Slc22a5	454.71	-0.538243	0.188383	-2.85717	0.00427434	0.065422
Rpl9	3168.01	0.334991	0.117299	2.85588	0.00429179	0.0656251
AABR07045416.1	5.15664	3.84157	1.3458	2.8545	0.00431053	0.0658477
Vps26c	431.498	-0.370621	0.129871	-2.85376	0.0043205	0.0659359
Adgra2	185.177	-0.576276	0.202004	-2.8528	0.00433364	0.0660723
Cux2	1982.31	0.688846	0.241525	2.85207	0.00434358	0.0661597
Plcd1	124.571	-0.516802	0.181344	-2.84984	0.00437412	0.0665603
Zc3h8	93.3507	0.698555	0.245238	2.84848	0.00439292	0.0667172
Slc35a5	95.4179	0.595909	0.209195	2.84859	0.00439136	0.0667172
Lhx2	147.887	0.66581	0.233826	2.84746	0.004407	0.0668015
Hm13	2500.67	0.250321	0.087901	2.84776	0.00440275	0.0668015
Clk1	1774.14	0.616279	0.216462	2.84705	0.0044127	0.0668015
Prkcd	303.901	-0.537109	0.188668	-2.84685	0.00441547	0.0668015
Sipa1l3	205.215	-0.522572	0.183706	-2.84462	0.0044465	0.0671446
Rbm25l1	223.962	0.504478	0.177346	2.8446	0.00444669	0.0671446
Kif1c	3062.86	-0.264234	0.0929129	-2.84389	0.00445665	0.0672303
Rps27a	4731.13	0.33303	0.117191	2.84178	0.00448623	0.0676117
Brat1	210.705	0.471077	0.165873	2.83999	0.00451153	0.0679279
Fzd2	37.9265	-1.17599	0.414261	-2.83876	0.00452889	0.068124
Slc19a2	1513.61	-0.689024	0.24291	-2.83654	0.00456053	0.0685343
Sez6l	27.8506	1.33486	0.470709	2.83585	0.00457039	0.068617
Gpbp1	1099.76	0.277371	0.0978472	2.83473	0.0045864	0.0686416
Mybpc3	4.60512	-3.77052	1.3302	-2.83454	0.0045891	0.0686416
Cptp	187.501	-0.47794	0.168567	-2.83531	0.0045781	0.0686416
Uchl1	60.5779	-1.20117	0.423766	-2.83452	0.0045895	0.0686416
Eif5a	7193.65	0.276154	0.0974796	2.83294	0.00461219	0.0689154
P4ha1	333.348	-0.527914	0.186377	-2.83251	0.0046184	0.0689427
Polr2f	361.09	0.410341	0.14493	2.83131	0.00463576	0.0690769
Mybbp1a	909.959	0.404461	0.142855	2.83128	0.00463618	0.0690769
Cd2ap	484.27	-0.490758	0.17341	-2.83004	0.00465425	0.0692182
Neurl4	574.801	0.502001	0.177399	2.82979	0.00465784	0.0692182
Acadvl	6650.8	0.329178	0.116329	2.82972	0.00465887	0.0692182
P2ry12	27.0251	0.966696	0.34171	2.829	0.00466944	0.0693097
AABR07002700.1	32.881	-1.23492	0.43676	-2.82745	0.00469207	0.0693834
Hmgcs2	37501	0.538537	0.190425	2.82808	0.00468285	0.0693834
Med14	324.404	-0.411816	0.145632	-2.82779	0.00468712	0.0693834
AABR07025295.1	303.816	-0.446809	0.158023	-2.8275	0.00469131	0.0693834
Cfh	18256.6	0.488651	0.17286	2.82687	0.00470059	0.069409
Socs3	78.9978	-1.1743	0.415429	-2.82673	0.00470262	0.069409
Slc33a1	1368.16	0.3372	0.119372	2.82479	0.00473123	0.0697629
Chst5	7.51807	-1.85444	0.656557	-2.8245	0.00473548	0.0697629
Zfp386	836.913	0.406398	0.143933	2.82353	0.0047498	0.0699084
RGD1565131	39.545	1.11268	0.394184	2.82274	0.00476151	0.0700151
Cmtm3	288.352	0.4259	0.150945	2.82156	0.00477906	0.0702075
Stx5	1016.34	0.308728	0.109505	2.8193	0.00481285	0.070638
Mrvi1	201.659	0.44345	0.157334	2.81853	0.00482446	0.0706762
Cndp1	117.797	0.48767	0.173012	2.8187	0.00482181	0.0706762
Mtpap	309.075	0.383756	0.136195	2.8177	0.00483692	0.0707929
Anapc1	462.373	0.30265	0.107456	2.8165	0.00485499	0.0709912
Dnajc5	219.729	-0.467451	0.166031	-2.81545	0.00487091	0.0711235
Ube2z	351.053	-0.368608	0.130944	-2.81501	0.00487761	0.0711235
Fam129c	34.0171	-1.52301	0.540986	-2.81525	0.00487397	0.0711235
Rap2a	203.587	-0.532072	0.189133	-2.81321	0.00490492	0.0714554
Efhd2	817.287	-0.35551	0.126395	-2.8127	0.00491281	0.0715041
Snx24	903.999	0.328987	0.117085	2.80981	0.00495714	0.0720825
Fam129a	99.3578	-0.927288	0.330144	-2.80874	0.00497361	0.0722105
Prkca	169.577	-0.611949	0.217881	-2.80864	0.00497512	0.0722105
Igsf3	65.055	-1.18006	0.420207	-2.80829	0.00498055	0.0722226
Sgms2	123.227	-0.670211	0.238755	-2.8071	0.00499892	0.0724222
Nlrp12	171.148	0.889247	0.316913	2.80596	0.00501662	0.0724781
Cyp2b2	2952.84	1.18854	0.423488	2.80654	0.00500763	0.0724781
RGD1561730	9.71125	-2.6594	0.947705	-2.80614	0.00501385	0.0724781
Slc1a5	49.0327	-0.873535	0.311562	-2.80373	0.00505149	0.0728956
Lamb3	144.714	-0.832595	0.296982	-2.80352	0.00505478	0.0728956
Steap1	6.5344	1.8386	0.656187	2.80194	0.00507962	0.0730968
Eef2	36859.5	0.350872	0.125233	2.80175	0.00508269	0.0730968
LOC100174910	246.759	-0.469649	0.167594	-2.8023	0.00507392	0.0730968
Card14	61.559	-0.969974	0.346374	-2.80036	0.00510451	0.0733435
Aptx	125.847	0.460522	0.164614	2.79759	0.00514859	0.0739093
Cyp2t1	794.212	-0.598718	0.214308	-2.79373	0.00521041	0.0746534
Pyroxd1	224.471	0.509969	0.182556	2.79349	0.00521427	0.0746534
Ntmt1	256.985	0.425781	0.15242	2.79346	0.00521467	0.0746534
Apba1	19.7258	-1.13366	0.406594	-2.78818	0.00530051	0.0757551
Ttpa	2518.52	-0.481351	0.172643	-2.78813	0.00530127	0.0757551
Rrp12	207.067	0.623853	0.223795	2.78761	0.00530988	0.0758093
Gabarap	4734.41	0.254421	0.0913183	2.78609	0.00533476	0.0760954
Rps4y2	219.702	-0.873168	0.313603	-2.78431	0.00536423	0.076389
Spice1	200.696	-0.543801	0.195313	-2.78426	0.00536507	0.076389
RF00554	8.85729	2.06307	0.741217	2.78335	0.00538007	0.0765333
Zbtb7b	1269.71	-0.482112	0.173375	-2.78075	0.00542339	0.0769407
Abcb6	1351.23	0.250147	0.089954	2.78083	0.00542194	0.0769407
Sept9	875.822	-0.364019	0.130884	-2.78123	0.00541535	0.0769407
Fscn1	40.5003	-0.734381	0.264352	-2.77804	0.00546877	0.0775146
Ethe1	1761.48	0.74787	0.269283	2.77726	0.00548188	0.0775604
Ttr	197570	0.447207	0.161022	2.7773	0.0054813	0.0775604
Isx	5.34807	-3.37994	1.21728	-2.77664	0.0054924	0.0776394
Rrm2b	43.4931	-1.10971	0.39985	-2.77531	0.00551488	0.0778172
Clic5	91.1604	-0.786029	0.283207	-2.77546	0.00551236	0.0778172
Sh3rf2	10.9932	-1.92176	0.692669	-2.77442	0.00552996	0.07796
Tial1	726.536	0.273328	0.098555	2.77335	0.00554822	0.0780595
Fam102b	31.9828	-0.925252	0.333642	-2.77319	0.00555105	0.0780595
Clip1	717.213	0.310443	0.111947	2.77313	0.00555191	0.0780595
Tacr3	5.18353	-3.46263	1.24883	-2.7727	0.00555926	0.0780929
Meox2	77.6096	1.323	0.477274	2.772	0.00557139	0.0781237
Gtf3a	518.615	0.379944	0.137064	2.77202	0.00557104	0.0781237
Adra1d	4.69098	-3.84443	1.3871	-2.77155	0.00557902	0.0781561
Optc	73.5092	0.832156	0.300279	2.77128	0.00558364	0.0781561
Tnfaip2	510.782	0.516395	0.186394	2.77045	0.00559789	0.0782162
Ndufv2	2504.46	-0.259513	0.0936632	-2.7707	0.00559351	0.0782162
Nop10	926.312	0.303951	0.109756	2.76934	0.00561702	0.0783442
Cd47	951.203	0.410984	0.148393	2.76957	0.005613	0.0783442
Syt17	42.1342	-1.12287	0.405573	-2.7686	0.00562972	0.0784231
Fibin	7.78735	-2.07055	0.747957	-2.76827	0.0056354	0.0784231
Luc7l3	912.227	0.33444	0.120818	2.76814	0.00563764	0.0784231
St7l	189.145	-0.497042	0.179596	-2.76755	0.00564795	0.0784289
Eif2s3	1674.7	0.509148	0.183971	2.76754	0.00564804	0.0784289
Cst3	2652.78	0.353828	0.127884	2.76679	0.00566108	0.0785406
B3galt4	174.642	0.484977	0.175635	2.76128	0.00575752	0.0798081
Rnf38	119.091	-0.678931	0.246112	-2.75863	0.0058044	0.0802513
Aurkaip1	3742.7	0.317014	0.114899	2.75906	0.00579675	0.0802513
Islr	511.865	0.492395	0.178512	2.75833	0.00580984	0.0802513
Tmem258b	32.7208	1.17571	0.426241	2.75832	0.00580991	0.0802513
Wisp2	13.6552	-4.02459	1.45937	-2.75776	0.00581997	0.0803197
C4bpb	12011.3	0.429239	0.155668	2.75739	0.00582641	0.0803381
Rmdn3	214.931	-0.371048	0.134624	-2.75619	0.00584798	0.0804985
Plpp3	4250.91	-0.439509	0.159464	-2.75617	0.00584829	0.0804985
Aplnr	39.3823	-1.20599	0.437699	-2.75529	0.005864	0.0806441
Plpp4	9.08041	3.11226	1.13031	2.75346	0.00589695	0.0809555
Myo1d	1268.53	-0.32783	0.119052	-2.75367	0.00589304	0.0809555
Glrx	1282.84	0.405863	0.147449	2.75256	0.00591309	0.0810356
Prmt9	209.898	0.437849	0.159054	2.75283	0.00590827	0.0810356
Aebp1	303.512	-0.611116	0.222082	-2.75176	0.00592764	0.0811642
Casq1	45.8117	-1.03885	0.377715	-2.75037	0.00595284	0.0814384
Clec4a1	217.106	0.455059	0.165532	2.74907	0.0059764	0.081583
Slc28a2	1521.52	0.443716	0.161398	2.7492	0.00597416	0.081583
Gc	150365	0.251327	0.091427	2.74893	0.00597898	0.081583
Tspo2	36.7777	-0.97847	0.356159	-2.74729	0.00600906	0.0819223
Syt2	3.27655	-4.11285	1.49742	-2.74662	0.00602129	0.0820179
Rpl11	7065.16	0.314266	0.114522	2.74415	0.00606686	0.0825671
Adcy9	164.885	-0.484859	0.176811	-2.74224	0.00610218	0.0829759
Tnks1bp1	1287.84	-0.320534	0.116964	-2.74046	0.00613528	0.0832379
Pomgnt2	105.126	-0.560705	0.204645	-2.73989	0.00614596	0.0832379
Rgs16	829.35	1.85708	0.677758	2.74004	0.00614324	0.0832379
H2afy	1737.27	0.21651	0.0789948	2.74081	0.00612875	0.0832379
Arid4b	38.227	0.929779	0.339362	2.73979	0.00614792	0.0832379
Unc79	13.824	-1.54673	0.564677	-2.73914	0.00616007	0.0833196
Ugt2a3	808.384	1.80398	0.658653	2.7389	0.00616456	0.0833196
Col1a2	31.5097	0.875616	0.319761	2.73835	0.00617489	0.0833876
Arhgef10l	672.155	-0.396459	0.144839	-2.73725	0.0061956	0.0835953
Pxmp4	1144.96	-0.708293	0.25882	-2.73663	0.00620723	0.0836804
RGD1560854	118.264	0.573501	0.209684	2.73507	0.00623664	0.0837593
Abca4	38.7227	-1.00053	0.36591	-2.73435	0.00625038	0.0837593
AABR07059002.1	2.74225	-4.29387	1.57019	-2.73461	0.00624544	0.0837593
Akr1b7	3467.13	1.55016	0.566876	2.73456	0.00624636	0.0837593
Cyp4a3	5796.68	-0.565148	0.206632	-2.73504	0.0062372	0.0837593
Rack1	6335.55	0.271167	0.0991627	2.73456	0.00624632	0.0837593
Sik1	573.355	-0.768524	0.28094	-2.73555	0.00622765	0.0837593
RGD1563986	64.5775	-0.63049	0.230663	-2.73338	0.00626878	0.0839344
Pycard	104.273	0.563272	0.206101	2.733	0.00627608	0.0839605
Prss22	15.2263	-1.83728	0.672381	-2.7325	0.00628556	0.0840159
Mindy3	1175.08	0.291087	0.10655	2.73193	0.0062964	0.0840892
C1qbp	1680.41	0.293309	0.107393	2.73116	0.00631109	0.0842139
LOC501297	5.65908	3.1387	1.1496	2.73026	0.00632839	0.0843732
Sema4a	494.006	-0.432478	0.158458	-2.72929	0.00634707	0.0844789
Strn	141.714	-0.696029	0.255	-2.72952	0.00634259	0.0844789
Adamts2	809.241	-0.62271	0.228283	-2.7278	0.0063758	0.0847896
Kmt5a	220.513	-0.436396	0.160074	-2.72622	0.00640642	0.0851247
Fas	333.863	0.40752	0.149604	2.72399	0.00644978	0.0855943
Sf3b6	283.551	0.482359	0.17709	2.72381	0.00645327	0.0855943
Dusp28	69.868	0.622053	0.228396	2.72357	0.0064581	0.0855943
Nfrkb	644.644	0.393248	0.14441	2.72314	0.00646648	0.0856332
Pigx	313.195	0.377375	0.138678	2.72122	0.00650406	0.0860583
Gpr155	403.628	0.409894	0.150711	2.71973	0.00653347	0.086346
Mcm10	291.155	0.57924	0.21299	2.71957	0.00653678	0.086346
Nnmt	751.679	0.693755	0.255212	2.71835	0.00656081	0.0864454
AABR07022144.1	149.305	0.451454	0.166069	2.71847	0.00655851	0.0864454
Nars	1802.11	0.293847	0.108089	2.71857	0.00655646	0.0864454
Dusp8	31.7336	-1.20323	0.442737	-2.71771	0.00657364	0.0865033
Papln	146.827	0.791152	0.291124	2.71758	0.00657621	0.0865033
Gar1	179.308	0.428105	0.157563	2.71703	0.00658697	0.0865724
Magi1	507.295	0.343274	0.126455	2.71459	0.00663572	0.0871403
Espn	5.31396	-3.87324	1.42824	-2.7119	0.00668991	0.0877786
Rab3gap1	380.424	-0.388501	0.143316	-2.7108	0.00671208	0.087996
Syt11	32.8921	-0.904399	0.333805	-2.70936	0.00674122	0.0883043
Tsx	316.043	-2.19476	0.8102	-2.70891	0.00675042	0.0883513
Srek1	720.567	0.409121	0.151118	2.7073	0.00678333	0.0884873
AABR07060872.1	298.008	-0.864735	0.319374	-2.7076	0.00677724	0.0884873
Pip4k2c	560.911	-0.264279	0.0976073	-2.70757	0.00677771	0.0884873
Ptgs2	20.8234	-0.918227	0.339101	-2.70782	0.00677259	0.0884873
Bok	95.4478	-0.913558	0.337547	-2.70646	0.00680038	0.0885627
Cytl1	11.4425	2.13584	0.789103	2.70666	0.0067963	0.0885627
Cplane1	39.339	-0.82981	0.306741	-2.70525	0.00682536	0.0888145
Eef1g	6723.94	0.222041	0.082096	2.70465	0.0068376	0.0889002
Vps33b	232.429	0.340999	0.126215	2.70174	0.00689783	0.0894613
Arhgap44	32.1869	-1.06346	0.393553	-2.7022	0.00688828	0.0894613
Net1	2262.65	0.52007	0.192483	2.70189	0.00689459	0.0894613
Pelp1	641.704	0.317295	0.117469	2.70109	0.0069112	0.0895607
LOC100911486	88.4019	-0.827847	0.306574	-2.70032	0.00692728	0.0896328
Asb8	688.995	0.344336	0.127531	2.7	0.00693387	0.0896328
Tfcp2	347.923	0.38719	0.143397	2.70012	0.00693152	0.0896328
Lgals2	220.159	-0.590225	0.218641	-2.69951	0.00694416	0.089692
Dpp3	955.897	-0.308008	0.114136	-2.6986	0.0069632	0.0897169
Taf1d	191.839	0.423851	0.157043	2.69895	0.00695582	0.0897169
Gfod2	56.1022	-0.769483	0.285126	-2.69874	0.00696021	0.0897169
Hfe	661.707	-0.505302	0.187271	-2.69825	0.00697061	0.0897387
Gcsam	18.1183	-1.21044	0.448727	-2.6975	0.00698624	0.0898664
Sfta2	3.39791	-4.25122	1.57627	-2.69701	0.0069965	0.0899247
Nanos1	6.98366	-1.79663	0.666327	-2.69632	0.00701103	0.0900379
AABR07015081.2	25903.5	0.609661	0.226155	2.69576	0.00702278	0.0901152
AY172581.2	1050.13	0.451704	0.167747	2.69278	0.00708593	0.0908513
Rrbp1	10184.3	0.439067	0.163096	2.69207	0.00710105	0.0908969
LOC681410	423.749	-0.36499	0.135566	-2.69233	0.00709545	0.0908969
Sult1c3	631.398	-1.02244	0.379964	-2.69088	0.00712647	0.091148
Vsig4	973.394	0.516151	0.191974	2.68866	0.00717405	0.091682
Ly6g6c	17.2372	-1.75264	0.652096	-2.6877	0.00719452	0.091869
AABR07045680.1	63.0558	-0.787157	0.292964	-2.68687	0.00721249	0.0920236
Arid5a	76.4859	-0.783938	0.292047	-2.68429	0.00726847	0.0926626
Rora	64.0522	0.621175	0.231454	2.68379	0.00727918	0.092724
Tgfbi	6758.39	0.26809	0.0999063	2.68341	0.00728754	0.0927553
Parp9	1079.76	-0.370429	0.138069	-2.68292	0.00729821	0.092816
Dhdds	1210.66	0.288229	0.107451	2.68243	0.00730901	0.0928782
Spry1	351.643	0.405529	0.151217	2.68177	0.00732334	0.0929851
Rab15	11.1144	-1.69481	0.63211	-2.6812	0.00733587	0.093069
LOC103690024	88.8075	-0.677489	0.252719	-2.68081	0.0073445	0.0931034
Map3k9	77.4719	-0.801909	0.299186	-2.6803	0.0073556	0.093169
Ckmt1	15.3666	-2.55569	0.953956	-2.67905	0.00738325	0.0934438
Tshr	49.1284	1.24242	0.463861	2.67843	0.00739678	0.0935399
Met	678.697	-0.389499	0.145482	-2.67729	0.00742203	0.0936331
Zfp598	1882.73	0.31274	0.116808	2.67738	0.0074201	0.0936331
Smcr8	172.886	-0.492132	0.183795	-2.67761	0.00741486	0.0936331
Cyr61	207.676	-0.870252	0.32553	-2.67334	0.0075101	0.0943666
Cep250	474.674	0.325724	0.121871	2.67269	0.00752459	0.0943666
LOC100362987	5.72813	2.04566	0.765224	2.67328	0.00751128	0.0943666
Actn2	26.2503	-1.2691	0.474677	-2.6736	0.0075041	0.0943666
Tkt	4502.71	0.353412	0.132213	2.67304	0.00751663	0.0943666
Atp9b	633.474	0.285122	0.106655	2.67332	0.00751044	0.0943666
Il15	60.8388	0.745871	0.279035	2.67304	0.00751679	0.0943666
Tmem119	87.0716	-0.818225	0.306161	-2.67253	0.00752819	0.0943666
Wdr6	472.241	-0.465604	0.174266	-2.6718	0.00754453	0.0944959
Fam193b	950.552	0.380686	0.142607	2.66948	0.00759696	0.095077
Zfp606	39.6566	-0.839317	0.314589	-2.66798	0.00763087	0.0951792
Klhl42	84.2075	-0.664863	0.24918	-2.6682	0.0076259	0.0951792
Myo5c	73.4547	-0.967326	0.362632	-2.66751	0.00764147	0.0951792
Oxa1l	2022.65	0.263501	0.0987473	2.66844	0.00762044	0.0951792
Cblb	466.585	0.50408	0.188878	2.66881	0.00761212	0.0951792
RGD1560281	5.89464	-2.43911	0.914375	-2.66752	0.00764136	0.0951792
Msh5	9.9872	1.45484	0.54547	2.66712	0.0076504	0.0952151
Tgfb2	130.455	-0.654532	0.24553	-2.66579	0.00768082	0.095518
RGD1305184	6.11812	-2.03981	0.765324	-2.66529	0.00769231	0.0955853
Mesp2	5.42585	-2.5178	0.945188	-2.66381	0.0077261	0.0959294
Atp11a	505.705	-0.511267	0.191991	-2.66297	0.00774547	0.096094
Mocs3	96.7546	-0.533675	0.200784	-2.65795	0.00786172	0.0970972
AABR07058158.1	14.2031	-1.39667	0.525512	-2.65773	0.00786682	0.0970972
Snx33	691.229	0.449179	0.168998	2.65789	0.00786305	0.0970972
Imp4	921.047	-0.260161	0.0978919	-2.65763	0.00786917	0.0970972
Afp	96525.2	1.03484	0.389202	2.65887	0.00784037	0.0970972
Casc3	574.434	-0.295322	0.111123	-2.65761	0.00786957	0.0970972
Ufsp1	58.2889	0.746901	0.281025	2.65777	0.00786599	0.0970972
AABR07004397.2	137.865	0.714586	0.269025	2.65621	0.00790245	0.0974264
Cd72	20.3785	-1.22402	0.461033	-2.65495	0.00793213	0.0977156
Ppp1r3c	1600	-0.912293	0.343756	-2.6539	0.00795681	0.0978764
Alas1	3746.06	-0.657284	0.247671	-2.65386	0.00795764	0.0978764
Tyw3	84.1292	0.577673	0.217762	2.65277	0.00798347	0.0980407
Il1rl1	12.2627	-1.83406	0.691343	-2.65289	0.0079806	0.0980407
Fam98c	179.496	0.533657	0.201222	2.65208	0.00799986	0.0980888
Lrsam1	92.442	-0.576692	0.217434	-2.65226	0.00799556	0.0980888
Dnajb12	1474.67	0.274799	0.103748	2.64873	0.00807957	0.098989
Pkp4	2070.62	-0.393729	0.148728	-2.64731	0.00811359	0.0993283
Nefm	5.34517	2.97211	1.12323	2.64603	0.00814427	0.0996262
Pkp3	190.403	-0.679521	0.256863	-2.64546	0.00815793	0.0997158
Gabbr1	393.636	0.404345	0.15288	2.64485	0.00817278	0.0998197

## Sheet: 20d
symbol	baseMean	log2FoldChange	lfcSE	stat	pvalue	padj
Rpl30	794.57	2.50186	0.168502	14.8477	7.20502e-50	1.19135e-45
Lig4	200.367	2.33039	0.167766	13.8907	7.21505e-44	5.96505e-40
LOC103690108	516.237	-2.21883	0.163583	-13.564	6.55068e-42	3.61052e-38
RT1-A2	1253.51	2.2071	0.178044	12.3964	2.7348e-35	1.1305e-31
Tspan8	210.801	-4.69062	0.405443	-11.5691	5.90711e-31	1.95348e-27
Lamc2	384.443	-2.69122	0.239338	-11.2444	2.46738e-29	6.79968e-26
Acad10	2102.56	1.75319	0.158419	11.0668	1.81788e-28	4.2941e-25
Clec2l	76.6224	-3.64418	0.332481	-10.9606	5.91214e-28	1.22197e-24
AC134224.3	2409.55	2.67146	0.24775	10.7829	4.14716e-27	7.57279e-24
Anxa13	194.15	-2.84583	0.264145	-10.7737	4.57985e-27	7.57279e-24
Pcdha6	95.1943	3.47421	0.324143	10.7181	8.36621e-27	1.25759e-23
AABR07044362.1	126.621	-5.14848	0.482654	-10.667	1.45179e-26	2.00044e-23
Mtmr1	564.951	-1.16519	0.109974	-10.5951	3.13885e-26	3.99237e-23
Cd44	262.439	-3.04046	0.289963	-10.4857	1.0053e-25	1.10818e-22
RT1-Bb	745.639	-3.19984	0.305124	-10.487	9.90863e-26	1.10818e-22
Spint1	83.3518	-3.10261	0.299907	-10.3452	4.399e-25	4.5461e-22
Fam111a	1397.35	-4.32858	0.420707	-10.2888	7.91323e-25	7.69678e-22
Vwa1	82.2294	-3.82882	0.379142	-10.0986	5.60251e-24	5.14653e-21
LOC100360791	3679.89	-1.65018	0.163594	-10.087	6.30529e-24	5.48726e-21
Lyc2	212.812	-4.70746	0.470275	-10.01	1.37736e-23	1.13874e-20
Rnf8	504.358	1.45219	0.146499	9.9126	3.66957e-23	2.88935e-20
Adgrg1	190.632	-2.63797	0.26772	-9.85349	6.62069e-23	4.97605e-20
Oca2	56.8683	3.78912	0.384991	9.84211	7.41424e-23	5.3302e-20
Amotl1	157.446	2.99691	0.304685	9.8361	7.8702e-23	5.42224e-20
Rbp1	6500.07	1.5628	0.159735	9.78373	1.3225e-22	8.74701e-20
Agxt2	3454.54	1.63849	0.168528	9.72237	2.42069e-22	1.53947e-19
Ccdc80	2924.22	1.29369	0.137784	9.38928	6.04121e-21	3.69968e-18
Epcam	533.146	-2.3527	0.251886	-9.34032	9.60431e-21	5.67169e-18
Anxa2	988.277	-1.74515	0.187138	-9.32544	1.10524e-20	6.30176e-18
Galm	2069.91	0.999033	0.108181	9.23487	2.58607e-20	1.42536e-17
Psmg3	323.683	-1.50311	0.163274	-9.20606	3.38314e-20	1.80453e-17
Ms4a18	57.1691	-4.54455	0.496006	-9.16229	5.08066e-20	2.62527e-17
Cmc1	286.875	-1.81355	0.19868	-9.12801	6.97684e-20	3.49582e-17
LOC100362027	2222.14	-1.43001	0.157146	-9.09987	9.04417e-20	4.39839e-17
Bphl	789.65	1.40591	0.158922	8.84653	9.02843e-19	4.26529e-16
Hyal1	317.567	-1.71247	0.193803	-8.83613	9.90938e-19	4.55143e-16
Wnt7a	37.7595	-4.92545	0.561166	-8.77716	1.67648e-18	7.49203e-16
Asap3	454.289	1.60843	0.183665	8.75739	1.99825e-18	8.695e-16
Tp53i3	525.396	1.24761	0.142987	8.72535	2.65362e-18	1.12507e-15
Cldn4	64.2426	-3.26825	0.376451	-8.68174	3.8977e-18	1.61121e-15
Car9	77.6815	-3.2662	0.376771	-8.66891	4.36265e-18	1.75943e-15
Pdia5	908.334	-2.52104	0.291108	-8.66016	4.71083e-18	1.85461e-15
Akr1b8	73.3713	-3.29658	0.383377	-8.5988	8.05567e-18	3.09769e-15
RT1-CE1	106.785	2.48126	0.289305	8.57662	9.76991e-18	3.67149e-15
Gpx2	136.304	-4.72075	0.551432	-8.56089	1.12e-17	4.11538e-15
Arl8b	1324.04	0.918616	0.1082	8.48998	2.06681e-17	7.42928e-15
Celsr1	84.998	-3.00171	0.354616	-8.46469	2.56827e-17	9.03541e-15
Mpzl2	126.6	-3.11418	0.368269	-8.45626	2.7608e-17	9.51039e-15
St14	177.931	-1.90472	0.225834	-8.43415	3.33619e-17	1.12579e-14
Col13a1	276.594	1.78593	0.212345	8.41049	4.08291e-17	1.35022e-14
Gpat3	248.671	2.67052	0.318935	8.37324	5.60552e-17	1.8174e-14
F11	4630.67	1.13613	0.135791	8.36672	5.92424e-17	1.88379e-14
RT1-CE4	760.128	1.15253	0.138209	8.33904	7.48936e-17	2.33654e-14
Ceacam1	4784.4	0.939165	0.113109	8.30316	1.01375e-16	3.10414e-14
Krt7	251.943	-3.83886	0.463406	-8.28401	1.19096e-16	3.58045e-14
Pgam1	3033.14	-0.798033	0.0966933	-8.25324	1.54159e-16	4.55183e-14
Lamb3	144.714	-2.5069	0.304038	-8.24536	1.64664e-16	4.77671e-14
Slc16a2	3218.04	0.944753	0.114962	8.21795	2.07019e-16	5.90183e-14
Cryab	218.477	-1.87414	0.228841	-8.18971	2.61864e-16	7.33885e-14
Pglyrp2	4175.63	0.97284	0.118973	8.17697	2.91072e-16	8.02146e-14
Scrn1	101.917	-2.39653	0.29425	-8.14452	3.80777e-16	1.03216e-13
LOC690045	56.7375	-6.2774	0.775637	-8.09322	5.81057e-16	1.54964e-13
Unc5cl	342.056	-2.09572	0.26214	-7.99466	1.29933e-15	3.41024e-13
Aoc1	72.3148	-6.83122	0.861446	-7.92994	2.19245e-15	5.57726e-13
Acat1	6124	1.12053	0.141282	7.9312	2.17034e-15	5.57726e-13
Sts	984.936	1.40757	0.177737	7.91937	2.3872e-15	5.8914e-13
S100b	61.1186	-4.14724	0.523664	-7.91965	2.38179e-15	5.8914e-13
Sfn	42.8735	-4.93752	0.623722	-7.91622	2.44845e-15	5.9537e-13
Wnt7b	40.0378	-4.13748	0.523953	-7.89667	2.86465e-15	6.86477e-13
Cdcp1	37.5083	-3.94579	0.500886	-7.87763	3.33648e-15	7.77817e-13
Elf3	83.1358	-3.22775	0.409743	-7.8775	3.33988e-15	7.77817e-13
P2rx7	311.007	2.04296	0.261134	7.8234	5.14148e-15	1.18076e-12
Acsl1	35893.3	1.26478	0.162819	7.76799	7.97386e-15	1.80613e-12
Krt19	218.682	-2.48464	0.321205	-7.73537	1.03103e-14	2.3038e-12
Kif12	238.001	-1.76855	0.228928	-7.72537	1.11531e-14	2.45889e-12
S100a11	466.367	-2.0095	0.260347	-7.71853	1.17682e-14	2.56035e-12
Matn4	28.717	-3.76889	0.489959	-7.69226	1.44558e-14	3.10425e-12
Cpb1	59.4709	-4.41967	0.574755	-7.68967	1.47513e-14	3.12709e-12
C1s	9264.82	-1.05512	0.138223	-7.63351	2.28455e-14	4.78165e-12
RGD1565367	71.1927	-2.80623	0.369148	-7.60193	2.91758e-14	6.01103e-12
AABR07044080.2	263.926	-1.24304	0.163542	-7.60073	2.94462e-14	6.01103e-12
Serpina4	17142.8	0.809433	0.106798	7.57908	3.48024e-14	7.01779e-12
Plet1	62.6054	-3.91404	0.517394	-7.56491	3.88136e-14	7.73233e-12
Kdelr3	167.427	-1.3197	0.174545	-7.56084	4.00477e-14	7.8832e-12
Plau	342.666	-1.84849	0.245492	-7.52974	5.08432e-14	9.89049e-12
Hadh	4507.4	1.07493	0.143778	7.47635	7.64135e-14	1.46918e-11
Itga3	162.766	-1.99221	0.267351	-7.45166	9.2174e-14	1.75184e-11
Kcnk1	26.0448	-3.44784	0.463704	-7.43544	1.04223e-13	1.95832e-11
Tnfrsf12a	166.786	-1.86898	0.251653	-7.42682	1.11237e-13	2.06663e-11
Guca2b	35.4578	-4.56884	0.615884	-7.41835	1.18589e-13	2.17875e-11
Rtel1	733.028	1.17677	0.158838	7.40857	1.2767e-13	2.31981e-11
Plat	275.093	-2.23539	0.302476	-7.3903	1.46497e-13	2.63297e-11
S100a6	279.015	-2.68164	0.36405	-7.36614	1.75641e-13	3.12282e-11
RGD1563354	134.176	-2.25201	0.305907	-7.36175	1.81515e-13	3.19293e-11
Cxcl16	334.728	-1.56204	0.212726	-7.34297	2.08902e-13	3.63599e-11
Degs2	31.5035	-3.5142	0.482777	-7.27914	3.35963e-13	5.78661e-11
Lypd8	80.2783	-9.32718	1.28273	-7.27133	3.5596e-13	6.06784e-11
Qsox1	3711.03	1.47262	0.203477	7.23728	4.57772e-13	7.72374e-11
Sncg	102.327	-3.46792	0.479318	-7.23511	4.65144e-13	7.76884e-11
AABR07024463.1	52.2648	3.6146	0.499718	7.23328	4.71472e-13	7.79579e-11
Krt8	5216.21	-1.02404	0.14173	-7.2253	5.00013e-13	8.18585e-11
Sod3	823.938	1.54135	0.213829	7.20833	5.66409e-13	9.18194e-11
Pmepa1	130.144	-2.25009	0.312444	-7.20157	5.9522e-13	9.5553e-11
Reg3b	175.49	-10.0244	1.39317	-7.19543	6.22658e-13	9.89966e-11
Crip1	300.854	-1.34051	0.186429	-7.19048	6.4562e-13	1.0167e-10
Tfcp2l1	163.197	-2.11767	0.295786	-7.15947	8.09903e-13	1.26337e-10
F11r	2938.96	-0.607383	0.0851172	-7.13584	9.61974e-13	1.48656e-10
Stau1	1668.83	0.544831	0.0764615	7.12557	1.03654e-12	1.58696e-10
Krt80	26.0751	-5.79097	0.815383	-7.10215	1.22831e-12	1.86331e-10
Lgals4	23.9161	-4.58043	0.64703	-7.07916	1.45026e-12	2.18e-10
Serinc2	43.848	-3.05972	0.433349	-7.06065	1.65721e-12	2.46864e-10
Card14	61.559	-2.56085	0.363649	-7.0421	1.89361e-12	2.79562e-10
Dpys	6041.07	1.17516	0.167142	7.03092	2.05173e-12	3.00224e-10
Hmgcs2	37501	1.33477	0.19047	7.0078	2.42092e-12	3.5114e-10
Atp1a1	5510.75	-0.700328	0.100639	-6.95883	3.431e-12	4.93318e-10
RGD621098	281.669	1.19924	0.172504	6.95195	3.60279e-12	5.13552e-10
RT1-CE10	703.917	1.86798	0.269966	6.9193	4.53894e-12	6.41465e-10
Prdx2	1751.45	-0.698691	0.10124	-6.90133	5.15189e-12	7.21919e-10
Reln	1051.87	0.935239	0.135556	6.89926	5.22731e-12	7.26333e-10
Cyp1b1	57.1178	-3.69342	0.535911	-6.89185	5.50706e-12	7.52556e-10
Slc22a23	4091.24	1.12627	0.16341	6.89232	5.48915e-12	7.52556e-10
Fam213b	293.31	-1.81779	0.264822	-6.86419	6.6868e-12	9.0628e-10
Plg	64948.8	0.628631	0.0916545	6.8587	6.94896e-12	9.34155e-10
Ccl21	227.33	-2.3531	0.344069	-6.83904	7.97254e-12	1.06311e-09
AY172581.10	47.2591	8.34472	1.22083	6.83531	8.1827e-12	1.08241e-09
Pamr1	406.451	-1.59236	0.2333	-6.8254	8.76793e-12	1.15062e-09
Rnh1	975.883	-0.696252	0.102083	-6.82044	9.07606e-12	1.18167e-09
Ano1	145.568	-1.83045	0.269148	-6.80092	1.03951e-11	1.34284e-09
Reep6	7774.88	1.14774	0.1689	6.79539	1.08016e-11	1.38454e-09
Krt10	485.327	-1.28072	0.188565	-6.79192	1.10648e-11	1.40736e-09
Dapk1	1248.4	0.998175	0.147252	6.77866	1.21295e-11	1.531e-09
Cav2	249.226	-1.36647	0.201851	-6.76972	1.2903e-11	1.6163e-09
Habp2	5963.56	0.749115	0.111046	6.74596	1.52021e-11	1.88997e-09
Fzd1	322.668	-1.27583	0.190128	-6.71037	1.94126e-11	2.39543e-09
Clstn1	347.48	-1.23477	0.184297	-6.69993	2.08526e-11	2.55406e-09
Sgpp2	60.405	-2.9791	0.445576	-6.68594	2.29449e-11	2.78966e-09
Cyc1	3211.59	-0.687542	0.102853	-6.68474	2.31342e-11	2.79215e-09
Lama5	561.407	-1.46763	0.220569	-6.65383	2.85561e-11	3.42156e-09
Lad1	49.962	-2.72716	0.41	-6.65162	2.89889e-11	3.44843e-09
Rflnb	33.515	-2.54228	0.38514	-6.60091	4.08628e-11	4.82619e-09
Spp1	548.614	-3.02082	0.458079	-6.59452	4.26623e-11	4.97556e-09
Afp	96525.2	2.56672	0.389234	6.59429	4.27293e-11	4.97556e-09
Slc35c2	2084.93	-3.4129	0.517831	-6.59076	4.3758e-11	5.05971e-09
RGD1565616	529.319	1.05936	0.160811	6.5876	4.4699e-11	5.13262e-09
Ndufb5	1343.3	-0.724251	0.110151	-6.57508	4.86286e-11	5.50735e-09
Map2	118.96	-2.16007	0.328483	-6.57589	4.83641e-11	5.50735e-09
Ggt1	79.1125	-3.07889	0.468816	-6.56737	5.12111e-11	5.76038e-09
Atp5mg	3175.85	-0.716788	0.109228	-6.56232	5.29783e-11	5.9189e-09
Mtmr11	161.834	-1.49164	0.227681	-6.55145	5.69798e-11	6.23948e-09
Tacstd2	20.7887	-8.71324	1.32981	-6.55223	5.66825e-11	6.23948e-09
Pip4p2	359.051	-1.02948	0.157102	-6.55293	5.64207e-11	6.23948e-09
Slc41a3	84.0207	-2.83905	0.434611	-6.5324	6.47261e-11	7.0411e-09
Myo5c	73.4547	-2.37859	0.364641	-6.52311	6.88655e-11	7.44242e-09
Orm1	13072.2	-1.76544	0.270718	-6.52131	6.96957e-11	7.48323e-09
Aqp5	161.113	-2.33254	0.358598	-6.50462	7.78882e-11	8.30891e-09
Golga4	1505.94	0.558957	0.0860332	6.497	8.19398e-11	8.6851e-09
Samm50	1144.07	-0.6604	0.101768	-6.48924	8.62691e-11	9.08573e-09
Itgae	144.625	-1.44638	0.223024	-6.48531	8.85473e-11	9.26665e-09
Itgb6	57.6096	-2.96519	0.457367	-6.48317	8.98123e-11	9.33992e-09
Slc15a1	33.3784	-4.4423	0.685496	-6.48042	9.14677e-11	9.45262e-09
Abcd2	690.33	1.65066	0.255239	6.46712	9.98876e-11	1.02586e-08
Usf2	1513.02	0.630478	0.0975435	6.46355	1.02272e-10	1.04387e-08
Tmprss2	129.058	-1.82606	0.28257	-6.46234	1.03097e-10	1.04583e-08
Mtch1	1435.81	-0.70626	0.109406	-6.45542	1.07922e-10	1.08811e-08
Comtd1	307.903	-1.10626	0.171762	-6.44067	1.18948e-10	1.192e-08
LOC498222	56.626	-2.43389	0.378249	-6.43463	1.23773e-10	1.23288e-08
LOC685767	21.2453	4.41466	0.687335	6.42287	1.33726e-10	1.32405e-08
Lmna	1196.17	-0.648453	0.101021	-6.41896	1.37206e-10	1.35041e-08
Slc25a3	3486.39	-0.657854	0.102538	-6.41574	1.40145e-10	1.37118e-08
Svil	1108.77	1.05927	0.165243	6.41039	1.4515e-10	1.4118e-08
Sh3bp5	1075	1.41826	0.221568	6.40102	1.54345e-10	1.49246e-08
P2rx5	81.6495	-6.91112	1.08091	-6.3938	1.61813e-10	1.55557e-08
Cox5a	2241.69	-0.695724	0.108966	-6.38476	1.71663e-10	1.64072e-08
Rpl6	3881.13	0.640871	0.100509	6.37622	1.81507e-10	1.72484e-08
Scn1b	176.842	-1.79406	0.282424	-6.35235	2.12047e-10	2.00354e-08
LOC691352	61.6139	-8.02219	1.26553	-6.33898	2.31291e-10	2.17296e-08
Gtf2e1	168.804	-1.44118	0.227792	-6.32676	2.50368e-10	2.33889e-08
Adam15	331.677	-1.2482	0.197398	-6.32327	2.56083e-10	2.37884e-08
Minos1	755.579	-0.769604	0.121909	-6.31293	2.73797e-10	2.52918e-08
Klf5	39.248	-3.11031	0.493159	-6.3069	2.84685e-10	2.61515e-08
Qdpr	4950.58	-0.719251	0.114114	-6.30291	2.92103e-10	2.66846e-08
R3hdm2	2607.22	0.624095	0.0991248	6.29605	3.05326e-10	2.77394e-08
Rtn4rl2	176.054	-3.13446	0.498635	-6.28609	3.25565e-10	2.94165e-08
Abhd3	101.761	4.43196	0.705467	6.28231	3.33576e-10	2.99765e-08
Cdh6	29.719	-3.78533	0.605774	-6.24874	4.13773e-10	3.69823e-08
Slc22a15	104.674	-1.17794	0.188567	-6.24678	4.19011e-10	3.72492e-08
Ttll9	134.764	-2.4304	0.389401	-6.24139	4.33693e-10	3.83482e-08
Atp6ap1l	32.0454	-2.68286	0.430938	-6.22563	4.79628e-10	4.21843e-08
Prrg4	64.1063	-2.40972	0.38726	-6.22249	4.89311e-10	4.2583e-08
Galnt12	30.3403	-3.12869	0.502763	-6.223	4.87737e-10	4.2583e-08
Nsf	442.559	0.857159	0.138218	6.20149	5.59328e-10	4.84214e-08
Ptgds	38.1991	-2.59719	0.419064	-6.1976	5.73322e-10	4.93743e-08
Dzip1l	77.1573	-1.6628	0.268511	-6.19269	5.91477e-10	5.06739e-08
Cdhr5	36.6537	-3.15442	0.510372	-6.18064	6.38434e-10	5.41359e-08
Ell2	923.654	0.824275	0.133352	6.18118	6.3625e-10	5.41359e-08
AC121740.1	34.2104	7.62608	1.23408	6.17959	6.42684e-10	5.42183e-08
Tgm2	3540.89	-0.712015	0.115496	-6.16487	7.05392e-10	5.92064e-08
Itih2	24731.4	1.00522	0.163103	6.16312	7.13273e-10	5.95655e-08
Mtr	208.414	1.00514	0.16315	6.16083	7.2364e-10	6.01276e-08
Sik3	1572.38	0.50871	0.0825908	6.1594	7.30206e-10	6.03698e-08
Chn2	516.272	0.821863	0.133553	6.15384	7.56285e-10	6.22148e-08
AABR07044383.1	106.491	-1.78726	0.290646	-6.14927	7.78406e-10	6.37175e-08
Nf1x	339.163	1.01125	0.164489	6.14783	7.85495e-10	6.39811e-08
RT1-CE7	685.444	-1.06618	0.173464	-6.1464	7.92603e-10	6.42436e-08
Pdgfb	43.9333	-2.00664	0.326657	-6.14296	8.09968e-10	6.50137e-08
Gabrp	86.7994	-3.91579	0.637378	-6.14358	8.06802e-10	6.50137e-08
LOC108348062	80.3758	2.03665	0.331802	6.13816	8.34806e-10	6.64929e-08
Cxcl6	29.2768	-4.84684	0.789722	-6.1374	8.38823e-10	6.64929e-08
Cdh3	136.425	-1.93581	0.315428	-6.13709	8.4046e-10	6.64929e-08
Tmem131	917.557	0.873663	0.142532	6.12957	8.81152e-10	6.93802e-08
Rhoq	190.617	-1.18493	0.193371	-6.12775	8.91288e-10	6.98458e-08
Tubb4a	17.5032	-3.49042	0.570141	-6.12202	9.23943e-10	7.20632e-08
Flna	1597.96	-0.980862	0.160529	-6.11018	9.95216e-10	7.68967e-08
Islr	511.865	1.10818	0.181367	6.11018	9.95177e-10	7.68967e-08
Fxyd1	1843.56	0.959044	0.156992	6.10887	1.00336e-09	7.71654e-08
Ccdc77	268.851	-0.96833	0.158869	-6.09515	1.09335e-09	8.36966e-08
Acnat2	211.448	-3.19994	0.525137	-6.09353	1.10448e-09	8.41594e-08
Slc34a2	1678.1	-1.23195	0.202633	-6.0797	1.20404e-09	9.13247e-08
Fbxo9	1180.61	-0.685503	0.113156	-6.05806	1.37777e-09	1.04024e-07
Akt2	1626.54	0.648717	0.107283	6.04679	1.47762e-09	1.10554e-07
Tm4sf20	25.4871	-7.87344	1.30193	-6.04751	1.47105e-09	1.10554e-07
Mal	40.9997	-2.17065	0.359374	-6.0401	1.54023e-09	1.14719e-07
Epn3	16.1675	-3.86575	0.640869	-6.03204	1.61901e-09	1.20046e-07
AC111831.1	92.0302	1.41633	0.234911	6.02924	1.64731e-09	1.21599e-07
Krt20	199.075	-3.19043	0.52977	-6.0223	1.71958e-09	1.2637e-07
Cdx2	16.4799	-4.46434	0.741853	-6.01783	1.76773e-09	1.29334e-07
Bicdl2	26.8907	-2.96332	0.492794	-6.0133	1.81787e-09	1.32416e-07
AABR07059807.1	22.3531	7.87644	1.31	6.01254	1.82639e-09	1.32454e-07
Serpina11	5090.35	0.722703	0.120434	6.00084	1.96303e-09	1.41216e-07
Slc8b1	581.509	-1.00448	0.167393	-6.00073	1.9643e-09	1.41216e-07
Cyp2c6v1	23775.3	-1.17156	0.195295	-5.99894	1.98613e-09	1.42167e-07
Panx2	94.7528	-2.26035	0.377473	-5.98811	2.123e-09	1.50882e-07
Cpe	43.2086	-2.76824	0.462309	-5.98787	2.12613e-09	1.50882e-07
Tspo	121.038	-1.57275	0.262894	-5.98244	2.19816e-09	1.55327e-07
Slc25a38	777.759	-0.84175	0.140792	-5.97867	2.24964e-09	1.58288e-07
Dusp3	1550.34	-0.467771	0.0783507	-5.97022	2.3694e-09	1.66008e-07
AA926063	46.284	-2.91812	0.489664	-5.95943	2.53114e-09	1.76592e-07
Proz	12017	0.670744	0.112565	5.95874	2.54195e-09	1.76602e-07
Siglec10	63.0598	1.8431	0.309397	5.95705	2.56833e-09	1.77688e-07
Serpina5	125.626	2.54448	0.427362	5.95392	2.61791e-09	1.80363e-07
Gdf2	1324.87	0.820791	0.138115	5.9428	2.80191e-09	1.92239e-07
Kifc3	585.536	-1.0564	0.178147	-5.92995	3.0303e-09	2.0705e-07
Borcs8	340.011	-0.89973	0.151888	-5.92363	3.14914e-09	2.14284e-07
Nhlrc3	314.334	0.852689	0.144143	5.91557	3.30729e-09	2.24123e-07
Cdh2	3376.16	0.799402	0.135322	5.90739	3.47561e-09	2.34568e-07
Ywhae	5569.05	0.451144	0.0764704	5.89958	3.64419e-09	2.44946e-07
Glis2	268.027	-1.63066	0.27695	-5.88791	3.91107e-09	2.6182e-07
Ttc28	274.835	0.768943	0.130962	5.87151	4.31854e-09	2.87931e-07
Shisa3	205.327	1.6043	0.273377	5.86846	4.39854e-09	2.92088e-07
Lcn2	2785.2	-4.05623	0.692159	-5.86026	4.62147e-09	3.05664e-07
Wfdc21	2714.89	-2.12873	0.363333	-5.85889	4.65964e-09	3.06961e-07
Pbld1	2106	-1.31249	0.224073	-5.85741	4.7013e-09	3.08476e-07
Bex2	442.903	1.57227	0.268992	5.84504	5.06435e-09	3.30984e-07
Bdh1	6978.37	1.0017	0.17162	5.83672	5.32385e-09	3.46574e-07
Adamts15	219.788	-1.62727	0.278834	-5.83597	5.34784e-09	3.46771e-07
Mlph	23.8493	-2.82816	0.484719	-5.83464	5.39074e-09	3.48187e-07
Agrn	1403	-0.861742	0.147838	-5.82897	5.57694e-09	3.57421e-07
Ern1	891.541	0.897763	0.15401	5.82925	5.56775e-09	3.57421e-07
Tcf7l1	889.253	0.896612	0.153951	5.82402	5.7449e-09	3.66764e-07
Chd9	455.046	0.916222	0.157372	5.82202	5.81412e-09	3.69756e-07
Shisa4	32.0414	-2.17315	0.373429	-5.81944	5.90463e-09	3.74073e-07
Scrn3	493.474	0.858134	0.147502	5.81776	5.96406e-09	3.76396e-07
Txndc12	1270.88	0.616556	0.106078	5.81228	6.16266e-09	3.87451e-07
Ifi27	4251.22	-0.917442	0.1579	-5.81028	6.23682e-09	3.90628e-07
Prelid2	365.442	1.93151	0.332483	5.80936	6.27117e-09	3.91298e-07
Slc22a18	2509.16	-0.638107	0.109911	-5.80567	6.41091e-09	3.96416e-07
Ets1	1500.16	0.779612	0.134299	5.80505	6.43455e-09	3.96416e-07
RGD1563692	14.3343	-4.96714	0.855714	-5.80467	6.4491e-09	3.96416e-07
Usp54	392.268	-0.739827	0.127445	-5.80509	6.43329e-09	3.96416e-07
Prss22	15.2263	-4.30919	0.74303	-5.79949	6.65183e-09	4.06114e-07
Gja1	632.487	-1.30086	0.22431	-5.79938	6.656e-09	4.06114e-07
Bpi	12.7022	-5.24548	0.906432	-5.78695	7.16753e-09	4.35717e-07
Cldn6	73.5305	-1.83676	0.317694	-5.78155	7.40152e-09	4.48294e-07
Steap4	1472.49	0.832322	0.14405	5.778	7.55933e-09	4.56181e-07
Tmod1	78.3122	-1.63937	0.284394	-5.76441	8.19442e-09	4.92708e-07
Ppl	151.997	-1.31318	0.227986	-5.75991	8.41566e-09	5.02357e-07
Krt17	10.3076	-7.44518	1.29245	-5.76051	8.38586e-09	5.02357e-07
Gstk1	2956.59	-0.967595	0.168102	-5.756	8.61323e-09	5.12301e-07
Slc43a3	834.065	-1.20584	0.209579	-5.75362	8.73537e-09	5.17108e-07
Plin3	676.257	-0.854207	0.148475	-5.75321	8.75659e-09	5.17108e-07
Fstl3	34.5592	-2.05724	0.357672	-5.75177	8.83161e-09	5.19682e-07
Anp32b	1987.18	0.696395	0.121128	5.74924	8.96471e-09	5.25644e-07
Rbpjl	23.3921	-3.07208	0.535009	-5.74212	9.35012e-09	5.46305e-07
LOC689574	3894.72	0.702316	0.122544	5.73115	9.97497e-09	5.80761e-07
Rhbdf2	212.654	-1.14975	0.201103	-5.71722	1.08281e-08	6.2822e-07
Rspo3	204.69	0.970069	0.169872	5.71059	1.12586e-08	6.50911e-07
Raph1	471.775	0.979603	0.171685	5.70582	1.15783e-08	6.67062e-07
Pkp1	15.0204	-4.98363	0.874982	-5.69569	1.22871e-08	7.05443e-07
AC125248.1	184.805	-3.39508	0.596935	-5.68752	1.289e-08	7.37494e-07
Adamts12	426.18	0.84544	0.148718	5.68487	1.30913e-08	7.46432e-07
Prkcz	238.591	-1.13621	0.199955	-5.68235	1.32858e-08	7.54919e-07
Evc	149.698	-1.53065	0.269625	-5.67695	1.37116e-08	7.76441e-07
S100a4	85.775	-2.15181	0.379313	-5.67292	1.40387e-08	7.92253e-07
Aknad1	202.813	1.26652	0.223336	5.67092	1.42033e-08	7.98813e-07
RT1-N2	277.871	8.10876	1.43139	5.66494	1.47075e-08	8.2437e-07
LOC100910996	15.9607	-5.51681	0.974263	-5.66254	1.49148e-08	8.3316e-07
C8b	11807.5	0.500756	0.0884933	5.65869	1.52534e-08	8.49209e-07
Hfe	661.707	-1.04939	0.185599	-5.65411	1.56659e-08	8.69246e-07
Slc25a24	174.098	-1.31453	0.23253	-5.65315	1.57534e-08	8.7118e-07
Inhbc	3819.61	1.2872	0.227758	5.65162	1.58938e-08	8.76015e-07
Tgfb2	130.455	-1.39047	0.246058	-5.651	1.59518e-08	8.76287e-07
Tpt1	36914.7	0.574132	0.101613	5.65019	1.60275e-08	8.7753e-07
B4galnt1	2403.99	0.905204	0.160518	5.63927	1.70771e-08	9.31916e-07
Pdcd6ip	3903.93	0.409546	0.0726688	5.63578	1.74264e-08	9.47847e-07
Ctr9	1459.17	0.903533	0.160659	5.62393	1.86665e-08	1.01197e-06
AABR07001634.1	57.9884	-2.91587	0.518644	-5.62211	1.88634e-08	1.0193e-06
Bid	436.78	-0.700761	0.124966	-5.6076	2.05147e-08	1.10492e-06
Cit	178.943	1.17717	0.210154	5.60147	2.12546e-08	1.14105e-06
Akr7a3	742.782	-2.38101	0.425392	-5.59722	2.17817e-08	1.16557e-06
Wdr70	163.452	0.87224	0.155944	5.59328	2.22823e-08	1.18689e-06
C17h6orf52	40.3612	2.07089	0.370267	5.59296	2.23236e-08	1.18689e-06
Fam135a	205.229	-1.08177	0.193456	-5.5918	2.24727e-08	1.19098e-06
Lhx2	147.887	1.32592	0.237328	5.58688	2.31182e-08	1.22127e-06
Ybx1-ps3	99.2982	-1.95874	0.351258	-5.57636	2.45606e-08	1.29334e-06
Tle1	1125.8	0.87167	0.156349	5.57515	2.47315e-08	1.29821e-06
Gstm4	876.882	-0.800779	0.143718	-5.57188	2.5201e-08	1.31867e-06
Tmem229b	121.661	-1.03386	0.185643	-5.56908	2.56082e-08	1.33575e-06
Ctgf	927.044	-2.76397	0.496766	-5.56392	2.63782e-08	1.37158e-06
Rps10	2884.46	0.846265	0.152177	5.56107	2.68121e-08	1.38978e-06
Igf2	34705.9	3.09902	0.557695	5.55684	2.74708e-08	1.41505e-06
Slc12a2	179.36	-1.4722	0.264916	-5.55722	2.74103e-08	1.41505e-06
Eloa	1340.5	0.447665	0.0806651	5.54968	2.86199e-08	1.46966e-06
Ecm1	3162.03	1.22419	0.220623	5.5488	2.87643e-08	1.4725e-06
Prr15l	40.572	-2.44359	0.440643	-5.54551	2.93106e-08	1.49584e-06
Lingo1	15.8336	-3.07059	0.554087	-5.54171	2.99532e-08	1.52393e-06
Gal3st1	14.1641	-3.58915	0.64912	-5.52925	3.21608e-08	1.63122e-06
Tmem50b	195.809	-1.08148	0.195757	-5.52459	3.30253e-08	1.66995e-06
Pfkp	88.8288	-1.37277	0.248868	-5.51607	3.46672e-08	1.74763e-06
Cblb	466.585	1.05266	0.190854	5.5155	3.47796e-08	1.74797e-06
Krt18	5686.08	-0.733836	0.133101	-5.51336	3.52037e-08	1.76392e-06
Cox7a2l2	1124.22	-0.618329	0.112243	-5.50885	3.61184e-08	1.80428e-06
AC127784.2	22.006	-4.2591	0.773752	-5.50448	3.70269e-08	1.8441e-06
Sox9	59.0374	-1.96506	0.35712	-5.5025	3.7444e-08	1.85927e-06
Cnn3	2148.73	0.746465	0.135863	5.49426	3.92345e-08	1.93322e-06
AABR07033745.1	21.8559	6.8773	1.25177	5.49404	3.92841e-08	1.93322e-06
AABR07032338.1	27.5018	2.72283	0.495596	5.49406	3.92794e-08	1.93322e-06
Cyp2a3	16434.7	-1.07586	0.196042	-5.4879	4.06738e-08	1.99567e-06
Tmem123	1497.63	-0.752854	0.137205	-5.48706	4.0868e-08	1.99927e-06
Upp1	108.929	-1.59739	0.291597	-5.47808	4.29976e-08	2.09724e-06
Tm4sf1	76.5166	-1.56388	0.285607	-5.47564	4.35937e-08	2.12006e-06
AC130970.1	301.512	-1.55612	0.28457	-5.46833	4.54303e-08	2.20291e-06
Havcr1	20.8256	-3.39091	0.620185	-5.46757	4.56248e-08	2.20587e-06
Cblc	33.9449	-2.05506	0.376067	-5.46461	4.63916e-08	2.23023e-06
Flrt3	99.3815	-2.2919	0.419449	-5.46407	4.65334e-08	2.23023e-06
Abcc4	130.284	-1.16426	0.213065	-5.46433	4.64668e-08	2.23023e-06
Tmbim1	156.139	-1.23786	0.226848	-5.45677	4.84862e-08	2.31043e-06
Kif1a	15.5237	-3.91096	0.716675	-5.4571	4.83979e-08	2.31043e-06
Hsdl2	687.865	0.791215	0.145058	5.45447	4.91185e-08	2.33384e-06
Pllp	13.5778	-3.05638	0.560408	-5.45385	4.92907e-08	2.33531e-06
Slc13a3	1922.39	1.44157	0.264409	5.45204	4.9796e-08	2.35251e-06
Oat	4606.08	-2.3262	0.426966	-5.44821	5.08792e-08	2.39683e-06
Sftpd	23.7923	-3.12068	0.573024	-5.44598	5.1522e-08	2.42022e-06
Tspo2	36.7777	-2.05316	0.377119	-5.44433	5.20005e-08	2.43147e-06
Fabp7	8743.65	1.36105	0.250003	5.44414	5.20556e-08	2.43147e-06
Emc2	554.312	0.682565	0.12539	5.44353	5.22352e-08	2.43298e-06
Syt11	32.8921	-1.84158	0.338485	-5.44064	5.30896e-08	2.46583e-06
Pkd2	226.195	-1.43141	0.2634	-5.43435	5.49969e-08	2.54726e-06
RGD1310127	747.59	0.684815	0.126068	5.43211	5.56904e-08	2.57218e-06
RT1-T24-3	159.485	1.21416	0.223553	5.4312	5.59748e-08	2.57812e-06
Bcl3	474.073	-1.43623	0.264506	-5.42986	5.63971e-08	2.59035e-06
Acnat1	45.6808	-2.29206	0.422416	-5.42608	5.76057e-08	2.63853e-06
Nr1h4	1682.52	1.1894	0.219546	5.41756	6.0418e-08	2.7521e-06
Grhl2	43.4026	-2.02753	0.374244	-5.41767	6.03792e-08	2.7521e-06
Stab1	560.64	1.0696	0.19756	5.41407	6.16082e-08	2.79861e-06
Pdgfrb	1373.86	0.617931	0.114442	5.3995	6.68263e-08	3.02732e-06
Fam129a	99.3578	-1.78789	0.33159	-5.39187	6.9727e-08	3.1501e-06
Atp5mc3	4186.72	-0.652263	0.121061	-5.38787	7.12991e-08	3.21235e-06
Cyb561d1	43.3016	-1.63704	0.30389	-5.38693	7.16723e-08	3.22039e-06
PVR	104.167	-1.31955	0.245176	-5.38207	7.36343e-08	3.29957e-06
Cox7c	2070.46	-0.756204	0.140531	-5.38103	7.40605e-08	3.30971e-06
Nptx2	139.193	2.69009	0.500138	5.37869	7.5029e-08	3.34395e-06
Gpbp1l1	399.269	0.871157	0.162017	5.37694	7.57634e-08	3.3676e-06
Hadha	6602.66	0.819065	0.152429	5.37342	7.72581e-08	3.42483e-06
Ifit1bl	37.9578	-1.87086	0.348513	-5.36813	7.95557e-08	3.48927e-06
Gipc2	30.5745	-2.75637	0.513383	-5.36903	7.91622e-08	3.48927e-06
Gapdh	4237.14	-1.01632	0.189315	-5.36841	7.94351e-08	3.48927e-06
Serpinb1a	227.933	-2.40791	0.448481	-5.36903	7.91616e-08	3.48927e-06
Pigu	675.126	1.03423	0.192951	5.36006	8.31946e-08	3.63921e-06
Pigl	112.601	-1.04802	0.195884	-5.35022	8.7846e-08	3.83254e-06
Cyp4a8	149.925	4.269	0.798441	5.34667	8.95871e-08	3.89822e-06
RT1-Ba	681.43	-2.20085	0.411864	-5.34363	9.11047e-08	3.95385e-06
Fermt2	2550.89	0.474361	0.0887896	5.34253	9.16579e-08	3.96744e-06
Dph3	318.482	-0.746782	0.139835	-5.34045	9.27141e-08	4.00268e-06
Rac3	543.427	-1.32778	0.248676	-5.33938	9.32635e-08	4.01592e-06
Ryr1	56.8673	-1.67656	0.314163	-5.33658	9.47136e-08	4.06777e-06
Ly6g6c	17.2372	-5.42917	1.01861	-5.32998	9.82237e-08	4.20759e-06
Arhgef16	29.968	-2.2079	0.414441	-5.32743	9.9613e-08	4.25607e-06
Pabpc1	6984	0.51765	0.0971995	5.32565	1.00594e-07	4.28692e-06
Rnf5	1347.34	0.768912	0.14446	5.32265	1.02266e-07	4.34697e-06
AABR07043748.1	176.695	-1.15229	0.216884	-5.31295	1.07865e-07	4.57319e-06
Clic3	50.6839	-1.84479	0.347353	-5.31099	1.09034e-07	4.61093e-06
Slit1	14.5556	-6.71206	1.26467	-5.30736	1.11223e-07	4.68427e-06
Tpd52	399.543	-0.758573	0.142933	-5.30718	1.11335e-07	4.68427e-06
Clec2dl1	89.537	-1.7806	0.33561	-5.30557	1.12324e-07	4.71392e-06
Ndufv1	2300.46	-0.46861	0.0883344	-5.30495	1.12703e-07	4.71783e-06
Acmsd	198.615	-3.25367	0.61344	-5.30397	1.1331e-07	4.73128e-06
Pgk1	4421.36	-0.71261	0.134538	-5.2967	1.17913e-07	4.90262e-06
Hs3st3a1	18.6285	-2.41089	0.455181	-5.29656	1.18007e-07	4.90262e-06
Col27a1	438.668	1.41521	0.267342	5.29362	1.1992e-07	4.96963e-06
Itga7	220.227	-1.1864	0.224141	-5.29308	1.20277e-07	4.97193e-06
Vsig10l	99.446	-1.04632	0.197875	-5.28777	1.23819e-07	5.09289e-06
Zfp142	714.834	0.672122	0.127108	5.28781	1.23791e-07	5.09289e-06
Cgrrf1	592.797	-0.650509	0.123099	-5.28444	1.26088e-07	5.17335e-06
Prss8	135.175	-1.68959	0.319757	-5.28398	1.26408e-07	5.17364e-06
RGD1559909	226.865	-1.09537	0.207422	-5.28088	1.28564e-07	5.24892e-06
Pla2g4c	72.0912	6.17983	1.17045	5.27988	1.2927e-07	5.26474e-06
Tmem79	49.4115	-1.65676	0.313869	-5.27851	1.30236e-07	5.27806e-06
Tpsab1	14.6201	-6.64124	1.25809	-5.27884	1.30004e-07	5.27806e-06
Eif2b2	374.718	0.693715	0.131523	5.27449	1.33129e-07	5.38213e-06
Acaa2	10253.9	0.716176	0.135819	5.27303	1.34188e-07	5.41172e-06
Flt4	701.327	0.784774	0.148858	5.27195	1.34979e-07	5.43038e-06
LOC100364500	80.1227	1.72746	0.327711	5.27128	1.35472e-07	5.43697e-06
Ap1m2	24.8439	-2.31225	0.439153	-5.26524	1.40007e-07	5.60536e-06
Rnd1	130.567	-1.45038	0.275571	-5.26318	1.41587e-07	5.65493e-06
Aldh8a1	11818.4	0.574684	0.109208	5.26228	1.42277e-07	5.66511e-06
Smarcc1	720.59	0.544828	0.103547	5.26166	1.42757e-07	5.66511e-06
AABR07029275.1	37.0169	-4.03238	0.766391	-5.26152	1.4287e-07	5.66511e-06
Plscr2	134.711	-1.05342	0.200387	-5.2569	1.46501e-07	5.79522e-06
Acsf3	513.506	-0.732975	0.139463	-5.25568	1.47482e-07	5.8201e-06
Upf2	633.714	0.738288	0.140588	5.25141	1.50941e-07	5.94239e-06
Bdh2	94.4043	-1.7713	0.337352	-5.25062	1.51592e-07	5.95385e-06
Gimd1	26.3486	-3.79445	0.723038	-5.24792	1.53825e-07	6.02725e-06
Slc25a28	613.913	-0.642771	0.122564	-5.24435	1.56835e-07	6.13065e-06
Slc25a11	1255.44	-0.446352	0.085182	-5.23998	1.60595e-07	6.26281e-06
Prodh1	2319.19	-1.36153	0.259908	-5.23852	1.61871e-07	6.29775e-06
Ahnak	755.352	-1.45271	0.277637	-5.2324	1.67324e-07	6.48167e-06
Dhfr	1513.34	0.770184	0.147207	5.23198	1.67702e-07	6.48167e-06
Acadvl	6650.8	0.608524	0.116317	5.23159	1.68057e-07	6.48167e-06
Slc4a1	332.581	-1.59685	0.30524	-5.23147	1.68167e-07	6.48167e-06
Rassf7	297.712	-1.09644	0.20985	-5.2249	1.74251e-07	6.70055e-06
Tmem268	586.389	-0.680053	0.130253	-5.22102	1.77939e-07	6.82651e-06
Rab5b	2636.36	0.409769	0.0785168	5.21887	1.80019e-07	6.89032e-06
Ndufa2	1217.33	-0.727539	0.139487	-5.21581	1.83012e-07	6.98869e-06
Gucy1a3	567.886	0.809978	0.155405	5.21203	1.86788e-07	7.11647e-06
Taok3	403.371	0.849072	0.162922	5.21151	1.87308e-07	7.11985e-06
Fundc2	104.535	-1.14584	0.220038	-5.20745	1.91449e-07	7.26057e-06
Stk38l	325.159	-0.68757	0.13217	-5.20217	1.96974e-07	7.45302e-06
Patl1	552.436	0.583805	0.112235	5.20161	1.97569e-07	7.45847e-06
Trem1	17.4691	-2.65345	0.51089	-5.19377	2.06076e-07	7.74916e-06
Aqp4	23.0578	-2.05477	0.395631	-5.19365	2.06207e-07	7.74916e-06
Dcaf6	918.907	0.751949	0.144887	5.18991	2.10396e-07	7.88867e-06
Uqcr11	1633.63	-0.706386	0.136551	-5.17307	2.30279e-07	8.61463e-06
Serhl2	101.203	-1.20607	0.233176	-5.17236	2.3115e-07	8.62768e-06
Muc1	106.527	-1.90386	0.368344	-5.1687	2.35723e-07	8.77856e-06
Siah2	377.103	0.92903	0.179808	5.1668	2.38137e-07	8.84851e-06
Misp	13.6071	-3.08143	0.596763	-5.16358	2.42271e-07	8.98196e-06
Sar1a	4505.98	-0.492954	0.0954965	-5.16201	2.44312e-07	9.03737e-06
Lrtm2	38.8917	-5.29067	1.0255	-5.15911	2.48125e-07	9.1579e-06
Manba	540.763	0.84556	0.163927	5.15814	2.49409e-07	9.18482e-06
Gstm3l	132.59	-2.13622	0.414224	-5.15716	2.50725e-07	9.21274e-06
Tmem11	425.346	0.675438	0.131038	5.15453	2.54267e-07	9.32219e-06
Cdkn2b	55.3127	-3.12651	0.607205	-5.14901	2.61867e-07	9.56306e-06
Smpd3	402.455	-1.02188	0.198466	-5.14892	2.61994e-07	9.56306e-06
Col8a1	85.165	-3.29131	0.639347	-5.14792	2.63392e-07	9.59293e-06
Cystm1	90.9865	-1.37558	0.267384	-5.14458	2.68118e-07	9.74357e-06
Sertad1	166.405	-1.15833	0.225214	-5.14325	2.70021e-07	9.7698e-06
Tmem144	245.16	-1.11585	0.216946	-5.14346	2.69727e-07	9.7698e-06
Tpp1	1735.6	0.385108	0.0749079	5.14108	2.73158e-07	9.86172e-06
Lilrb3	353.961	1.30435	0.253962	5.13599	2.80662e-07	1.01106e-05
Atp11a	505.705	-0.977325	0.190593	-5.12783	2.93106e-07	1.05359e-05
Asl	7832.35	-1.22526	0.239169	-5.12299	3.00735e-07	1.07867e-05
Dusp15	32.207	-5.9276	1.15739	-5.12151	3.03095e-07	1.08461e-05
Smyd2	382.923	-0.966979	0.188821	-5.12113	3.03704e-07	1.08461e-05
Irf5	151.91	-0.868278	0.169566	-5.12059	3.04588e-07	1.08542e-05
Gpt	1459.08	-2.08037	0.406658	-5.11577	3.12468e-07	1.10676e-05
Lgals2	220.159	-1.13389	0.221615	-5.11651	3.11246e-07	1.10676e-05
Uchl1	60.5779	-2.30949	0.451452	-5.1157	3.12582e-07	1.10676e-05
Polr1b	242.709	0.827628	0.162103	5.10555	3.2983e-07	1.1632e-05
Smurf2	894.902	0.576131	0.112845	5.10549	3.29931e-07	1.1632e-05
Uqcr10	1593.06	-0.809127	0.158531	-5.10392	3.3269e-07	1.17043e-05
Kcna6	10.4069	-4.29322	0.841286	-5.10316	3.34027e-07	1.17264e-05
LOC100362999	220.777	1.00306	0.196597	5.10214	3.3583e-07	1.17647e-05
Crip2	2587.52	0.557295	0.109296	5.09896	3.41518e-07	1.19387e-05
Psmb4	1944.09	-0.713606	0.140061	-5.09498	3.48787e-07	1.21671e-05
Trim16	21.2493	-2.74255	0.538564	-5.09233	3.53681e-07	1.23118e-05
Glul	9084	0.960774	0.188822	5.08825	3.61385e-07	1.25536e-05
Ifi27l2b	3784.76	-1.48709	0.292802	-5.07884	3.79752e-07	1.31639e-05
Supt6h	1472.28	0.452737	0.0892697	5.07156	3.94566e-07	1.36489e-05
Loxl1	331.125	-1.24041	0.24474	-5.06828	4.01433e-07	1.38574e-05
Tenm2	22.8624	2.75724	0.54429	5.06574	4.06809e-07	1.40137e-05
Bex4	101.653	1.58241	0.312958	5.05631	4.27454e-07	1.46943e-05
Rdx	1062.93	0.963553	0.190707	5.05254	4.35974e-07	1.49561e-05
Pqlc3	63.6429	-1.47698	0.292769	-5.04485	4.53881e-07	1.55381e-05
Slc22a8	2703.37	1.01382	0.201202	5.03884	4.68357e-07	1.59866e-05
Prmt2	82.0499	-1.00215	0.198894	-5.03861	4.68914e-07	1.59866e-05
Rab11b	1681.86	0.54693	0.108581	5.03709	4.72672e-07	1.60815e-05
Vom2r44	25.8727	2.19982	0.436841	5.03575	4.75988e-07	1.61611e-05
Psme3	618.817	0.57469	0.114142	5.03485	4.78212e-07	1.61702e-05
Cenpj	406.188	0.888475	0.176463	5.03489	4.78113e-07	1.61702e-05
Madd	200.635	-0.68435	0.135969	-5.03314	4.825e-07	1.62819e-05
Cnp	383.155	-0.696684	0.138445	-5.03221	4.84866e-07	1.63284e-05
Lilrb4	41.455	-2.28151	0.453442	-5.03154	4.86544e-07	1.63516e-05
Tut4	805.721	0.937782	0.186475	5.02898	4.9309e-07	1.6538e-05
Mapk13	37.1766	-2.24668	0.446912	-5.02713	4.97884e-07	1.6665e-05
Ehhadh	4395.71	0.915529	0.182139	5.02654	4.99406e-07	1.66822e-05
Fchsd2	855.354	0.712438	0.14175	5.02602	5.00755e-07	1.66935e-05
Car12	142.828	-2.75829	0.548952	-5.02465	5.04361e-07	1.67799e-05
Rhbdd1	312.82	0.696414	0.13864	5.02317	5.08264e-07	1.68758e-05
Gpr182	1028.5	0.748662	0.149083	5.02178	5.11937e-07	1.69637e-05
Gstt3	6769.8	-2.47247	0.492438	-5.02089	5.14328e-07	1.70088e-05
Nup62	2534.39	1.33215	0.265386	5.01968	5.17574e-07	1.7082e-05
Ubap2	676.212	0.680237	0.135623	5.01563	5.28589e-07	1.73762e-05
Rab15	11.1144	-4.99289	0.995402	-5.01595	5.27707e-07	1.73762e-05
Ptprn2	14.618	-2.92166	0.582623	-5.01466	5.31267e-07	1.74075e-05
AABR07035008.1	22.9909	2.26693	0.452072	5.01452	5.31648e-07	1.74075e-05
Plekhs1	29.7885	-2.04253	0.407482	-5.01258	5.3706e-07	1.755e-05
Jag2	23.3632	-2.01045	0.40117	-5.01147	5.40154e-07	1.76163e-05
Meis2	131.938	0.924868	0.184647	5.00886	5.47535e-07	1.78218e-05
Cd63	1777.84	-1.20149	0.240044	-5.00531	5.57709e-07	1.81173e-05
Esrp1	10.9315	-3.38477	0.676493	-5.00341	5.63243e-07	1.82499e-05
Adamts8	19.0392	-4.10581	0.820644	-5.00315	5.63997e-07	1.82499e-05
AABR07058831.1	132.487	-1.07225	0.214456	-4.99989	5.73643e-07	1.85073e-05
Rnps1	1008.19	0.487786	0.0975631	4.9997	5.74189e-07	1.85073e-05
Sun2	711.743	0.575683	0.115206	4.99699	5.82328e-07	1.87331e-05
Resp18	51.1149	2.07946	0.416534	4.99229	5.96685e-07	1.91576e-05
Pycr2	150.103	-0.840769	0.168451	-4.99118	6.00113e-07	1.92304e-05
Ppif	1041.35	-0.492392	0.0987336	-4.98707	6.13011e-07	1.96057e-05
Mapk8ip1	296.131	-0.745403	0.149484	-4.98651	6.14799e-07	1.96249e-05
Naca	5569.82	0.507852	0.101918	4.98297	6.26149e-07	1.99487e-05
Hao2	2309.08	-1.4376	0.288546	-4.98223	6.28551e-07	1.99867e-05
Ckmt1	15.3666	-5.85696	1.1779	-4.97239	6.61324e-07	2.09885e-05
Atp5f1a	10893	-0.435997	0.0877126	-4.97075	6.66961e-07	2.11268e-05
AABR07029596.1	39.5234	-2.02016	0.406442	-4.97034	6.68354e-07	2.11305e-05
Lrp2	241.951	-1.12924	0.227322	-4.96755	6.78037e-07	2.13957e-05
B4galt5	350.943	-1.06353	0.214181	-4.96555	6.85052e-07	2.15759e-05
Mme	34.7769	-2.24007	0.451366	-4.96288	6.94571e-07	2.18341e-05
Ddr1	175.35	-1.11938	0.225672	-4.96019	7.04253e-07	2.20965e-05
Mgam	750.515	0.953188	0.19227	4.95754	7.13903e-07	2.22939e-05
Lyz2	939.16	-1.17183	0.236383	-4.95735	7.14599e-07	2.22939e-05
Commd8	310.617	-0.669029	0.134977	-4.95662	7.17289e-07	2.22939e-05
AABR07015507.1	393.422	-0.813883	0.164189	-4.95698	7.15973e-07	2.22939e-05
Timmdc1	600.822	0.680207	0.137227	4.9568	7.16626e-07	2.22939e-05
Trem2	10.693	-4.26478	0.860836	-4.95423	7.26186e-07	2.25281e-05
Anxa1	295.541	-1.33136	0.269032	-4.94869	7.47137e-07	2.31347e-05
Mphosph10	382.597	0.776107	0.157167	4.93811	7.88823e-07	2.43798e-05
Cd200r1l	92.1506	1.132	0.229475	4.93299	8.09808e-07	2.49817e-05
Arpc1b	1430.82	-0.433187	0.0878438	-4.93134	8.16686e-07	2.51469e-05
Usp40	613.523	0.57659	0.116954	4.93007	8.21991e-07	2.52632e-05
Pnrc1	1087.8	0.875154	0.17764	4.92655	8.36941e-07	2.5675e-05
Masp2	6711.82	0.589044	0.119676	4.922	8.5664e-07	2.62306e-05
Slc6a8	217.989	-0.909881	0.184881	-4.92143	8.59144e-07	2.62587e-05
Mest	524.921	1.3304	0.270471	4.91884	8.70589e-07	2.65594e-05
Gstm1	19906.8	-0.940702	0.191363	-4.91581	8.84179e-07	2.69243e-05
Tpcn1	2141.61	0.589316	0.120035	4.90954	9.12925e-07	2.77486e-05
Col7a1	35.8542	-1.69231	0.344779	-4.90839	9.18286e-07	2.78603e-05
Atp1b1	1166.47	-1.20363	0.245275	-4.90727	9.23526e-07	2.79679e-05
Eif5b	1006.07	0.48045	0.097927	4.90621	9.28547e-07	2.80686e-05
Nim1k	122.522	1.81574	0.370525	4.90046	9.5614e-07	2.88499e-05
Sema6d	373.176	0.733527	0.149717	4.89943	9.61128e-07	2.89476e-05
Papln	146.827	1.42637	0.291324	4.89616	9.77294e-07	2.9381e-05
AC120486.9	15.0434	4.4868	0.916825	4.89384	9.88855e-07	2.96746e-05
Ass1	35012.1	-1.49875	0.306382	-4.89177	9.9933e-07	2.99346e-05
Pard3	1077.3	0.54635	0.111817	4.88609	1.02856e-06	3.07544e-05
Fbxo44	63.6936	-1.67186	0.342264	-4.88471	1.03583e-06	3.09161e-05
LOC685680	14.9042	-2.70648	0.55427	-4.88296	1.04505e-06	3.11351e-05
Nol6	511.895	0.563413	0.115453	4.88002	1.06073e-06	3.15452e-05
Epas1	3981.64	0.535411	0.109727	4.87949	1.06358e-06	3.15733e-05
Rgs5	128.318	-1.78148	0.365281	-4.877	1.0771e-06	3.19173e-05
Gaa	1403.72	0.519485	0.106595	4.87344	1.09673e-06	3.24407e-05
Kif5c	15.3181	-2.44226	0.501495	-4.86996	1.11623e-06	3.29001e-05
Pla2g15	438.121	-0.826973	0.169802	-4.87021	1.11479e-06	3.29001e-05
C4a	408.368	-0.933905	0.192028	-4.86338	1.15396e-06	3.39514e-05
A3galt2	48.3078	-1.81903	0.374275	-4.86014	1.17303e-06	3.44514e-05
Mettl7a	944.183	-1.45061	0.298531	-4.85918	1.17872e-06	3.45288e-05
Leo1	493.453	0.658434	0.135508	4.85899	1.17985e-06	3.45288e-05
B4galnt4	40.2614	-2.02559	0.416936	-4.85828	1.1841e-06	3.45921e-05
Tpsb2	14.0701	-6.36534	1.31107	-4.85506	1.20349e-06	3.50964e-05
Tapbp	705.144	-0.622688	0.1283	-4.85336	1.21389e-06	3.53373e-05
Cst7	18.0761	-2.52818	0.521009	-4.85246	1.21939e-06	3.54352e-05
Egln3	45.7609	-3.74695	0.772306	-4.85163	1.2245e-06	3.55213e-05
Aldh7a1	6686.28	-0.639952	0.131933	-4.85057	1.23105e-06	3.56488e-05
Serbp1	2695.12	0.499244	0.103005	4.84677	1.25486e-06	3.62747e-05
Akirin1	374.376	-0.663415	0.136911	-4.8456	1.26233e-06	3.64268e-05
Pcnx1	1373.47	0.432285	0.0892357	4.8443	1.2706e-06	3.66016e-05
Dclk1	67.1679	-1.87823	0.387799	-4.8433	1.27703e-06	3.67229e-05
Mertk	537.693	0.623231	0.128806	4.83853	1.30806e-06	3.75499e-05
Acad11	2649.32	0.66514	0.137529	4.83636	1.32238e-06	3.78953e-05
Ctse	70.6553	-1.7597	0.363922	-4.83537	1.32901e-06	3.80193e-05
Ap2a2	1800.44	0.339272	0.0701904	4.83359	1.34091e-06	3.82935e-05
Papss1	199.558	-1.01263	0.209538	-4.83267	1.34713e-06	3.84048e-05
Serpinf2	23356.2	0.440234	0.0911566	4.82943	1.36928e-06	3.89021e-05
Agtpbp1	128.751	-1.69249	0.35045	-4.82946	1.36902e-06	3.89021e-05
Acvr1	368.029	0.7261	0.150403	4.8277	1.3812e-06	3.91733e-05
AABR07014550.1	102.037	-1.76097	0.364855	-4.82648	1.38965e-06	3.93456e-05
Adh1	41822	0.911437	0.188952	4.82365	1.40957e-06	3.98415e-05
Dsc2	904.263	-0.638258	0.132409	-4.82037	1.43293e-06	4.04327e-05
Kcnj16	17.5992	-2.99536	0.621989	-4.81577	1.46632e-06	4.13044e-05
Htatip2	154.617	-1.24225	0.258224	-4.81073	1.50377e-06	4.22872e-05
Cfhr1	4828.93	-1.20993	0.251543	-4.81004	1.50897e-06	4.22895e-05
Cyb561	107.708	-1.38046	0.28698	-4.81029	1.50709e-06	4.22895e-05
Btrc	394.609	0.622799	0.129533	4.80803	1.52426e-06	4.26457e-05
Pwwp2b	47.2668	-1.48852	0.309678	-4.80668	1.5346e-06	4.27183e-05
Dclre1a	569.765	0.772677	0.160747	4.80678	1.53382e-06	4.27183e-05
Card6	952.709	0.73633	0.153187	4.80674	1.53408e-06	4.27183e-05
Hsd17b4	5596.96	0.51234	0.106606	4.80595	1.54022e-06	4.28026e-05
AABR07024473.2	9.13616	4.25115	0.884908	4.80406	1.55482e-06	4.31358e-05
Morc4	193.766	1.14544	0.238549	4.8017	1.57323e-06	4.35736e-05
Hspb8	1218.99	-0.623385	0.129862	-4.80036	1.58382e-06	4.37935e-05
Anxa8	52.2468	-3.49899	0.729104	-4.79903	1.59435e-06	4.4011e-05
Tes	195.512	-1.34197	0.279986	-4.79301	1.64298e-06	4.52026e-05
Smarcd2	908.666	0.506327	0.105635	4.79317	1.64164e-06	4.52026e-05
Chd1l	629.52	0.892161	0.186198	4.79147	1.65565e-06	4.54753e-05
Adam12	21.9258	2.11911	0.44231	4.791	1.65952e-06	4.55061e-05
Nfu1	464.004	0.778128	0.162485	4.78894	1.67668e-06	4.59005e-05
Pitpnm3	81.131	-1.74681	0.364925	-4.78675	1.69502e-06	4.63035e-05
Syce2	235.364	-1.15365	0.241021	-4.78652	1.697e-06	4.63035e-05
Ano9	32.1947	-1.75737	0.367178	-4.78615	1.70012e-06	4.63121e-05
AABR07005821.1	680.821	-2.63839	0.551326	-4.78554	1.70527e-06	4.63759e-05
Ndufb8	2461.37	-0.680475	0.142261	-4.7833	1.7244e-06	4.68192e-05
Rarres2	12511.5	0.723458	0.151417	4.77793	1.77112e-06	4.79304e-05
Map1lc3a	610.94	-0.870589	0.182207	-4.77802	1.77033e-06	4.79304e-05
Thrap3	1971	0.61198	0.128127	4.77635	1.7851e-06	4.82297e-05
Smc1a	1449.89	0.547027	0.114544	4.7757	1.7908e-06	4.83049e-05
Foxo3	203.047	1.06976	0.224123	4.7731	1.81407e-06	4.88529e-05
Cyp2b1	1115.04	1.28585	0.269545	4.77044	1.83821e-06	4.94224e-05
Medag	19.5867	-2.63423	0.552239	-4.77009	1.84148e-06	4.943e-05
Rragc	739.836	-0.560047	0.117497	-4.76648	1.87474e-06	5.01781e-05
Nudt12	410.679	0.698275	0.146499	4.76641	1.87542e-06	5.01781e-05
Lpcat3	1622.95	0.518658	0.10888	4.76356	1.9021e-06	5.08098e-05
Lrfn3	19.0741	3.92667	0.82453	4.76231	1.9139e-06	5.10424e-05
RT1-CE3	39.2481	2.55209	0.536357	4.7582	1.95331e-06	5.20097e-05
Tle2	386.175	-0.709888	0.149284	-4.7553	1.98152e-06	5.26758e-05
Tmem41a	228.378	-0.780493	0.164258	-4.75162	2.01792e-06	5.35575e-05
Clcf1	77.3583	-1.28768	0.271037	-4.75094	2.02478e-06	5.35675e-05
Mettl7b	1217.46	-5.83338	1.22779	-4.75111	2.02302e-06	5.35675e-05
Mrps35	584.714	0.614511	0.129418	4.74828	2.05149e-06	5.41876e-05
Smyd5	250.269	0.906596	0.190979	4.7471	2.06358e-06	5.44199e-05
Arhgef19	1065.27	-1.32821	0.279846	-4.74623	2.07245e-06	5.45667e-05
Zc3h18	944.009	0.558848	0.117761	4.74561	2.07879e-06	5.46467e-05
St6gal1	10169.3	0.526372	0.111023	4.7411	2.12564e-06	5.57897e-05
Cecr2	157.989	1.04707	0.220943	4.73909	2.14679e-06	5.62072e-05
Masp1	1701	0.705876	0.148952	4.73894	2.14835e-06	5.62072e-05
LOC685431	60.7623	-1.50065	0.316992	-4.73401	2.20122e-06	5.74994e-05
Snx3	2784.42	0.458998	0.0970475	4.72962	2.24936e-06	5.86642e-05
Ube2r2	2363.1	0.503012	0.106432	4.72613	2.28834e-06	5.9587e-05
Smarcd3	105.38	-1.28751	0.272445	-4.72576	2.29256e-06	5.9603e-05
Pls1	748.108	0.96479	0.204204	4.72463	2.30534e-06	5.98335e-05
Xylb	6390.82	0.568423	0.120318	4.72434	2.30867e-06	5.98335e-05
Mrvi1	201.659	0.748431	0.158443	4.72366	2.31634e-06	5.98449e-05
Eif4g2	7448.99	0.471566	0.0998266	4.72385	2.3142e-06	5.98449e-05
Efna4	55.084	-1.73189	0.366827	-4.72128	2.34365e-06	6.0456e-05
Tuba1c	83.9723	-1.4282	0.302793	-4.71675	2.39642e-06	6.17208e-05
Ehf	70.5385	-1.99347	0.422715	-4.71586	2.40688e-06	6.18642e-05
Plk3	130.663	-1.60576	0.34054	-4.71533	2.41321e-06	6.18642e-05
Arhgap21	782.94	0.676868	0.143546	4.71533	2.41314e-06	6.18642e-05
Tmem205	2705.45	-0.811432	0.172123	-4.71427	2.42581e-06	6.20909e-05
Lrpprc	1813.45	0.526703	0.111844	4.70928	2.48588e-06	6.35303e-05
Slc7a6	62.9992	-1.33461	0.283746	-4.70353	2.55699e-06	6.52467e-05
Scn4b	14.2747	-5.87811	1.25004	-4.70233	2.57213e-06	6.55319e-05
RGD1310935	7.19418	-6.63095	1.41038	-4.70155	2.58194e-06	6.56807e-05
Creb3l3	10835.8	0.983942	0.209471	4.69726	2.63673e-06	6.69714e-05
Ndufs8	1411.06	-0.409252	0.0871373	-4.69664	2.64478e-06	6.70728e-05
P2ry14	84.4939	1.08565	0.23126	4.6945	2.67261e-06	6.76305e-05
Cmtm6	1492.19	-0.603158	0.128487	-4.69432	2.67495e-06	6.76305e-05
Rps10l1	504.675	-1.85184	0.394615	-4.69278	2.69523e-06	6.80391e-05
Me3	215.68	-1.84429	0.393046	-4.69231	2.70141e-06	6.80911e-05
Myh14	343.174	-0.951652	0.202864	-4.69107	2.71774e-06	6.83986e-05
Itgb1bp1	301.287	-0.605913	0.129208	-4.68945	2.73941e-06	6.88392e-05
Ubac1	251.601	-0.695252	0.14843	-4.68403	2.81285e-06	7.05774e-05
Cebpa	3924.7	0.875612	0.187011	4.68215	2.83885e-06	7.10141e-05
Tbc1d5	371.062	0.526369	0.11242	4.68215	2.8388e-06	7.10141e-05
Rab3d	190.493	-0.999989	0.213603	-4.68154	2.84729e-06	7.11177e-05
Tpm1	2242.04	-0.744581	0.159194	-4.67718	2.90851e-06	7.25372e-05
Max	751.244	0.560953	0.119969	4.6758	2.92808e-06	7.29153e-05
LOC100911107	57.0162	-5.9777	1.27869	-4.67488	2.94127e-06	7.31336e-05
Ftcd	5801	-0.634699	0.135876	-4.67115	2.99514e-06	7.43613e-05
Sat1	1209.04	-0.986391	0.211311	-4.66796	3.04212e-06	7.53254e-05
Msln	578.743	-2.00632	0.429814	-4.66789	3.04308e-06	7.53254e-05
Irf2	513.009	0.659285	0.141283	4.66642	3.06499e-06	7.57542e-05
Fam220a	116.763	-1.36405	0.292367	-4.66553	3.0782e-06	7.59672e-05
Nfkbie	114.217	-1.06993	0.229345	-4.66517	3.08357e-06	7.59863e-05
Blk	63.6428	-1.23976	0.265809	-4.6641	3.09974e-06	7.6271e-05
Sema4a	494.006	-0.748847	0.160584	-4.66328	3.11206e-06	7.64605e-05
AABR07037536.1	12.6772	2.81266	0.60403	4.65649	3.2165e-06	7.87923e-05
Npas2	426.073	1.02145	0.219351	4.65668	3.21352e-06	7.87923e-05
Naga	1005.69	-0.368478	0.0791585	-4.65494	3.24071e-06	7.92679e-05
AABR07072511.1	137.411	3.55104	0.763288	4.6523	3.28257e-06	8.01733e-05
Tmem200c	9.11265	-4.62322	0.994217	-4.65011	3.3176e-06	8.09093e-05
Prom1	218.176	-1.65431	0.355887	-4.64841	3.345e-06	8.14574e-05
Spice1	200.696	-0.891482	0.191805	-4.64786	3.35397e-06	8.15558e-05
Fam83f	17.3907	-2.33506	0.502617	-4.6458	3.38761e-06	8.22527e-05
Cdhr2	83.5335	-1.80647	0.38902	-4.64364	3.4232e-06	8.29951e-05
Cemip2	1057.72	0.859447	0.185176	4.64125	3.46311e-06	8.37467e-05
Neurl3	128.368	-1.45896	0.314351	-4.64118	3.46433e-06	8.37467e-05
Gprc5a	19.3113	-2.58916	0.558194	-4.63846	3.5101e-06	8.47291e-05
Dock3	114.487	1.02856	0.221937	4.63449	3.57819e-06	8.6247e-05
Aldh1a2	151.969	-1.72593	0.372474	-4.6337	3.59189e-06	8.64511e-05
Rab7a	3669.21	0.434035	0.0937013	4.63211	3.61953e-06	8.69896e-05
Slc35f6	536.63	-0.5873	0.127025	-4.62349	3.77343e-06	9.05568e-05
AABR07044635.1	15.873	-2.83157	0.612511	-4.62289	3.78436e-06	9.06876e-05
Sdsl	263.811	-1.33004	0.287739	-4.6224	3.79332e-06	9.07707e-05
LOC100361934	85.5808	-1.01649	0.219998	-4.62048	3.82854e-06	9.1481e-05
Paqr6	59.3483	-1.39723	0.302535	-4.61841	3.86684e-06	9.21299e-05
Sept5	40.6778	-1.4453	0.312937	-4.61851	3.8651e-06	9.21299e-05
Slc6a6	384.776	1.83979	0.398429	4.6176	3.88206e-06	9.23594e-05
RGD1563861	90.7443	-1.13169	0.24512	-4.61689	3.89529e-06	9.25411e-05
Grpel1	1686.28	-0.557584	0.120811	-4.61533	3.92468e-06	9.31055e-05
Polg	3423.35	0.559937	0.121364	4.61371	3.9555e-06	9.37024e-05
Apc2	57.0685	1.31488	0.28549	4.6057	4.11083e-06	9.72425e-05
Clpx	3763.08	0.875986	0.190212	4.60532	4.11825e-06	9.72789e-05
RGD1359290	305.617	3.91068	0.84953	4.60335	4.15751e-06	9.80663e-05
Aqp3	12.6283	-3.03604	0.659841	-4.60116	4.20142e-06	9.89607e-05
Sctr	85.5481	-1.32325	0.287629	-4.60054	4.2139e-06	9.91136e-05
Myof	200.8	-1.02073	0.221949	-4.59893	4.24661e-06	9.97411e-05
C1r	14109.4	-0.491402	0.10688	-4.59771	4.27168e-06	0.000100188
Tmem54	5.86691	-6.66961	1.45096	-4.59669	4.29261e-06	0.000100536
Ppig	973.602	0.765616	0.166611	4.59522	4.32288e-06	0.000100959
AABR07044414.1	65.0103	-2.27318	0.494658	-4.59546	4.31805e-06	0.000100959
Hebp2	115.309	-1.32191	0.287842	-4.59249	4.37985e-06	0.000102145
Fgfr3	851.98	-1.16094	0.252888	-4.59072	4.41726e-06	0.000102872
Bcam	570.277	-1.11015	0.241952	-4.5883	4.46878e-06	0.000103926
Rp1	37.8563	2.41143	0.526024	4.58425	4.55618e-06	0.000105661
Il24	9.43723	-6.878	1.50028	-4.58447	4.5514e-06	0.000105661
Pes1	991.653	0.429497	0.0937405	4.58177	4.61058e-06	0.000106773
Cacnb2	94.605	1.64086	0.358167	4.58128	4.62132e-06	0.000106872
Adcy1	449.261	1.91535	0.418214	4.57983	4.65343e-06	0.000107464
Ldhd	559.139	-0.783817	0.171287	-4.57605	4.73826e-06	0.000109271
Psmb10	717.608	-0.659625	0.144199	-4.5744	4.77582e-06	0.000109984
Trpm2	512.074	-0.866389	0.189448	-4.57322	4.80289e-06	0.000110453
Dcdc2	113.05	-1.74408	0.381463	-4.57207	4.82924e-06	0.000110905
Ankrd22	30.2417	-2.13548	0.467751	-4.56542	4.98489e-06	0.000114321
Grb7	1033.78	0.855356	0.18738	4.56481	4.99939e-06	0.000114494
Slc12a4	670.081	-0.549595	0.120531	-4.55978	5.12061e-06	0.000117108
Itga2	12.2396	-3.91235	0.858448	-4.55747	5.17741e-06	0.000118244
Gnl2	681.339	0.576463	0.126523	4.5562	5.20879e-06	0.000118748
Mpped1	19.7462	8.18676	1.79698	4.55584	5.21766e-06	0.000118748
Slc22a5	454.71	-0.858476	0.188452	-4.55542	5.22822e-06	0.000118748
Uqcc2	272.217	-0.744679	0.16347	-4.55545	5.22732e-06	0.000118748
Trak2	738.364	-0.612475	0.134506	-4.55352	5.27555e-06	0.000119659
Tmem243	480.242	-0.748583	0.16441	-4.55316	5.28466e-06	0.000119701
Sdcbp	1080.49	-0.769171	0.169287	-4.5436	5.53009e-06	0.000125089
Ptprh	174.332	-1.12849	0.248469	-4.54178	5.57801e-06	0.000125829
Oard1	351.701	-0.570472	0.125604	-4.54183	5.57687e-06	0.000125829
Pik3cd	283.125	-0.776941	0.171111	-4.54056	5.6104e-06	0.000126387
Mta1	1199.68	0.501057	0.110362	4.54011	5.62241e-06	0.000126485
LOC103693430	70.9248	-1.50691	0.332047	-4.53825	5.6722e-06	0.000127432
RGD1561161	188.651	-1.15497	0.254572	-4.53693	5.70799e-06	0.000128062
RF00405	32.4086	-1.60314	0.353427	-4.536	5.73305e-06	0.000128123
Mgarp	22.3428	-2.70371	0.596061	-4.53597	5.73398e-06	0.000128123
Zfp202	276.735	0.661786	0.14588	4.53652	5.71904e-06	0.000128123
Pigt	1342.76	0.520579	0.114816	4.53403	5.78687e-06	0.000129131
Sarm1	79.7055	-1.83379	0.40452	-4.53326	5.80796e-06	0.000129427
Gna15	56.9096	-1.23224	0.271959	-4.53097	5.87135e-06	0.000130663
Pla2g16	1641.53	-0.713208	0.157426	-4.53044	5.88609e-06	0.000130779
Fetub	110857	-0.523642	0.115589	-4.53021	5.89238e-06	0.000130779
Cpxm2	29.5607	-2.45355	0.541838	-4.5282	5.94871e-06	0.000131606
Ebf4	29.2424	2.05591	0.45404	4.52803	5.9535e-06	0.000131606
Tef	769.959	-0.864337	0.190863	-4.52858	5.93809e-06	0.000131606
Pianp	121.917	0.879719	0.194437	4.52445	6.05527e-06	0.000133499
Mmp7	8.31427	-4.31689	0.954095	-4.52459	6.05132e-06	0.000133499
AABR07073038.1	2340.5	0.512169	0.113264	4.52189	6.12906e-06	0.000134945
AABR07064719.1	202.807	0.673042	0.148873	4.52092	6.15714e-06	0.000135356
Nsmce2	410.115	0.622309	0.137658	4.52068	6.1641e-06	0.000135356
Slc4a3	16.5669	-1.92502	0.425876	-4.52013	6.18006e-06	0.000135527
Erg	175.473	0.753924	0.166837	4.51893	6.21524e-06	0.000136118
Glud1	21526.1	0.627689	0.13897	4.51672	6.28043e-06	0.000137364
Lsm5	75.1029	-1.12171	0.248395	-4.51581	6.30762e-06	0.000137776
Wdr35	111.904	-0.995909	0.22066	-4.51331	6.38228e-06	0.000139223
Tmx1	359.478	-0.710113	0.157496	-4.50876	6.52066e-06	0.000142054
Mindy3	1175.08	0.481964	0.106981	4.50514	6.63291e-06	0.000144309
Tspan11	21.1841	-2.39456	0.531559	-4.50478	6.64417e-06	0.000144364
Sh3rf2	10.9932	-4.44549	0.986909	-4.50446	6.65434e-06	0.000144396
Fblim1	187.483	-1.18135	0.262369	-4.50261	6.71244e-06	0.000145466
Pitrm1	928.009	0.492486	0.109438	4.50014	6.79084e-06	0.000146972
Hacd2	1500.2	0.768939	0.17096	4.49777	6.86701e-06	0.000148426
AABR07018244.2	39.739	-1.80054	0.400374	-4.49714	6.88736e-06	0.000148672
Qpct	320.735	1.07261	0.238611	4.49524	6.94923e-06	0.000149812
Bach2	74.9016	1.22074	0.271616	4.49435	6.97838e-06	0.000150077
Vil1	21.3664	-2.42286	0.539095	-4.49431	6.97969e-06	0.000150077
Slc30a3	98.0755	-1.18323	0.263515	-4.49018	7.11625e-06	0.000152814
Adcy10	135.187	2.45999	0.54792	4.48969	7.13285e-06	0.000152972
Sema3c	195.514	-1.55037	0.345382	-4.48886	7.16043e-06	0.000153166
Nop10	926.312	0.489578	0.109062	4.48897	7.15684e-06	0.000153166
Cux2	1982.31	1.08731	0.242248	4.48843	7.17489e-06	0.000153278
Arhgef28	35.3186	-2.10287	0.469734	-4.47673	7.5795e-06	0.000161712
Lyve1	2332.36	0.753886	0.168496	4.47421	7.66939e-06	0.000163419
AABR07047789.1	330.879	0.72807	0.162938	4.46837	7.88168e-06	0.000167727
AABR07057436.1	9273.17	-0.613983	0.13746	-4.46662	7.94656e-06	0.00016889
Mab21l3	242.466	-3.6078	0.808604	-4.46177	8.12856e-06	0.000172224
Dstn	1036.44	0.624319	0.139931	4.46161	8.13466e-06	0.000172224
Tmem184a	165.553	-0.734686	0.164648	-4.46216	8.11385e-06	0.000172224
Echdc3	2521.39	0.595376	0.133497	4.45983	8.20235e-06	0.000173435
Nolc1	833.725	0.67692	0.151797	4.45938	8.21977e-06	0.000173581
Grb14	1656.63	0.448428	0.100617	4.4568	8.31903e-06	0.000175453
Cldn23	9.5345	-4.28562	0.962178	-4.45408	8.42519e-06	0.000177466
Eif3a	3460.54	0.485789	0.109097	4.45283	8.47477e-06	0.000178283
Sgca	16.0504	-2.43675	0.547321	-4.45214	8.50184e-06	0.000178625
Reps1	150.659	0.790098	0.177478	4.45181	8.51489e-06	0.000178672
Cx3cl1	102.55	-1.28267	0.288154	-4.45134	8.53359e-06	0.000178838
Pak6	18.0573	-2.61274	0.587077	-4.45042	8.57025e-06	0.000179379
Fcna	1309.11	0.676751	0.152111	4.44905	8.62492e-06	0.000180295
Lrig3	333.834	0.696795	0.15664	4.4484	8.65137e-06	0.000180619
S100a16	790.688	-0.649472	0.14606	-4.4466	8.72385e-06	0.000181903
Ptrh1	58.2613	-1.64419	0.369816	-4.44598	8.74934e-06	0.000182205
Mical3	521.735	0.688015	0.154829	4.44371	8.84222e-06	0.000183676
Tmem231	251.04	0.85202	0.191729	4.44388	8.83522e-06	0.000183676
Ethe1	1761.48	1.1937	0.268705	4.44243	8.89504e-06	0.000184541
Gpr155	403.628	0.659647	0.148548	4.44062	8.97005e-06	0.00018551
Nrcam	25.6675	-2.33293	0.525378	-4.44048	8.97584e-06	0.00018551
Mst1r	31.0933	-2.22182	0.500374	-4.44033	8.98228e-06	0.00018551
RT1-T24-4	465.833	0.696305	0.156818	4.44022	8.98661e-06	0.00018551
AABR07011057.2	55.1866	3.73087	0.84098	4.43634	9.15026e-06	0.000188653
Map3k9	77.4719	-1.32158	0.297936	-4.43579	9.17367e-06	0.0001889
Epo	46.4878	-2.36759	0.534062	-4.43317	9.28567e-06	0.000190968
Bloc1s2	232.063	-0.901358	0.203468	-4.42998	9.4243e-06	0.000193579
Acp5	337.472	-0.894562	0.201993	-4.42867	9.48144e-06	0.000194511
Atp5po	3481.63	-0.427955	0.0966623	-4.42732	9.54096e-06	0.000195489
Aldh6a1	11497.4	0.554769	0.125441	4.42255	9.75412e-06	0.000199609
Megf9	374.36	0.921769	0.20845	4.422	9.779e-06	0.000199871
Plekhg6	157.515	-0.832886	0.188433	-4.42007	9.86677e-06	0.000201416
Cdc26	359.376	0.514138	0.116333	4.41954	9.89128e-06	0.000201667
Cox14	313.501	-0.623158	0.141219	-4.4127	1.02089e-05	0.000207886
Acot12	2513.81	0.552663	0.12531	4.41037	1.03194e-05	0.000209878
Insc	396.793	-0.994558	0.225537	-4.40974	1.03496e-05	0.000210235
Mtss1l	182.908	0.636288	0.144301	4.40945	1.03635e-05	0.000210258
Pmaip1	27.5882	-1.81418	0.411526	-4.40843	1.04122e-05	0.000210988
Rab25	27.9807	-1.81488	0.41211	-4.40388	1.06333e-05	0.000215204
Rnf167	1599.87	0.457641	0.103932	4.40328	1.06625e-05	0.00021553
LOC497899	185.47	0.652669	0.148584	4.39258	1.12011e-05	0.0002259
Sebox	42.97	-1.36286	0.310266	-4.39255	1.12028e-05	0.0002259
Cd14	803.237	-1.30317	0.296703	-4.39216	1.12231e-05	0.000226034
Lgalsl	595.915	0.619442	0.141058	4.3914	1.12621e-05	0.000226544
Tnnt1	46.3274	1.13879	0.259459	4.38911	1.13817e-05	0.000228672
Guca2a	13.1988	-2.94084	0.670347	-4.38705	1.149e-05	0.000230567
AABR07066567.1	10.5665	3.78079	0.86206	4.38577	1.15578e-05	0.000231646
AABR07003235.1	18.2951	-2.34383	0.534568	-4.38453	1.16237e-05	0.000232685
Rhov	16.8394	-2.64261	0.602764	-4.38415	1.16441e-05	0.000232812
Ccdc91	405.755	0.651175	0.14858	4.38266	1.17238e-05	0.000234122
Ccdc120	112.497	-1.28156	0.292467	-4.38192	1.1764e-05	0.000234359
Higd1a	652.527	-0.794632	0.181333	-4.38218	1.17499e-05	0.000234359
Itgb4	168.926	-1.13127	0.258352	-4.37879	1.1934e-05	0.000237459
Adora1	296.585	-1.06683	0.243672	-4.37815	1.19688e-05	0.000237581
AABR07035348.1	3603.11	0.87556	0.199974	4.37837	1.1957e-05	0.000237581
Marcksl1	91.0315	1.02902	0.235098	4.37701	1.2032e-05	0.000238547
Aldh3b1	48.6355	-1.16653	0.266668	-4.37445	1.2174e-05	0.000240748
Gpx3	547.423	-0.982596	0.224633	-4.37422	1.21867e-05	0.000240748
Setd1b	431.554	0.775973	0.177386	4.37448	1.21722e-05	0.000240748
Hbegf	33.9826	-1.61981	0.370421	-4.3729	1.22604e-05	0.000241917
F2rl1	18.347	-3.11164	0.711856	-4.37116	1.23587e-05	0.000243275
Ido2	164.394	-1.1393	0.260631	-4.37132	1.23495e-05	0.000243275
Ncald	584.905	0.586382	0.134205	4.36931	1.24642e-05	0.00024506
Ace	31.338	-2.06563	0.473207	-4.36518	1.2702e-05	0.000249438
Celsr2	53.2581	-1.14263	0.261822	-4.36416	1.27613e-05	0.000250307
Ndufb6	554.49	-0.614521	0.14089	-4.36172	1.29044e-05	0.000252813
Pa2g4	1258.81	0.490459	0.112471	4.36077	1.29603e-05	0.000253309
Rassf9	28.8348	-2.73031	0.626106	-4.36078	1.29599e-05	0.000253309
Ttc9	23.9955	-1.78677	0.409791	-4.3602	1.29944e-05	0.000253675
Ifi44	240.578	0.787822	0.180711	4.35957	1.30316e-05	0.0002541
Rpf1	345.47	0.496749	0.113986	4.35799	1.3126e-05	0.00025564
B3galt5	20.3695	-2.58258	0.592774	-4.35677	1.31999e-05	0.000256777
Nme2	3485.04	-0.442374	0.101552	-4.35615	1.32368e-05	0.000257012
AABR07034428.1	20.8725	-5.02346	1.15321	-4.35605	1.32431e-05	0.000257012
Vtcn1	10.3406	-4.48178	1.02901	-4.35541	1.32816e-05	0.000257458
Slc5a6	589.118	-0.612686	0.140686	-4.35498	1.33082e-05	0.00025767
Igsf3	65.055	-1.82002	0.418137	-4.35268	1.34485e-05	0.000260083
Sgpl1	1708.99	0.747955	0.171913	4.35079	1.35647e-05	0.000262025
Pabpc4	2438.05	0.435761	0.10017	4.3502	1.36012e-05	0.000262422
Atp5mc1	2533.82	-0.61031	0.140312	-4.34966	1.36347e-05	0.000262763
Mtpap	309.075	0.592979	0.136389	4.34769	1.37578e-05	0.000264826
Banf1	1096.52	0.552656	0.127129	4.34721	1.37878e-05	0.000265095
Vamp5	92.327	-0.897646	0.206561	-4.34568	1.38847e-05	0.000266647
Nipsnap3b	1375.69	-0.485108	0.111648	-4.34498	1.39288e-05	0.000267184
Auh	914.515	0.409683	0.0943303	4.34307	1.40506e-05	0.000268897
LOC100174910	246.759	-0.706528	0.162679	-4.34307	1.40502e-05	0.000268897
LOC680039	667.252	-0.516575	0.118965	-4.34223	1.41044e-05	0.000269615
Tp53	1018.1	0.545236	0.125607	4.3408	1.41966e-05	0.000271064
Pnpla6	222.625	-0.639548	0.147381	-4.33943	1.42854e-05	0.000272445
Gpc1	18.0515	-2.40727	0.554928	-4.33799	1.43792e-05	0.000273917
Plek2	105.25	-0.850127	0.196005	-4.33726	1.44268e-05	0.000274508
Slc7a4	27.5276	-1.50207	0.346473	-4.3353	1.45562e-05	0.000276651
Slc1a5	49.0327	-1.3862	0.319954	-4.33248	1.47437e-05	0.000279893
Poll	359.11	0.65249	0.150639	4.33149	1.48104e-05	0.000280838
Gzf1	309.798	-0.530996	0.122692	-4.32788	1.50549e-05	0.000285146
LOC100911486	88.4019	-1.32374	0.305916	-4.32714	1.51055e-05	0.000285778
AABR07005844.1	539.783	-2.2781	0.526575	-4.32625	1.51667e-05	0.000286607
Sft2d2	1358.79	-0.641504	0.148296	-4.32582	1.51967e-05	0.000286846
Slc38a7	602.762	0.633928	0.146649	4.32277	1.54084e-05	0.000290511
LOC360919	3532.72	0.737467	0.170648	4.32156	1.54927e-05	0.000291768
Krtcap3	18.6031	-2.31911	0.536883	-4.31958	1.56325e-05	0.000294065
Tdrp	70.1867	-1.15157	0.266636	-4.31886	1.56837e-05	0.000294694
Fbln2	302.925	-1.3571	0.314295	-4.31793	1.57497e-05	0.000295598
Hnrnpul1	1925.31	0.383191	0.0888043	4.31501	1.59599e-05	0.000299203
Taf13	227.61	-0.677362	0.156988	-4.31475	1.59787e-05	0.000299216
Lzts3	239.318	-0.952051	0.220676	-4.31425	1.60147e-05	0.000299551
Cox7b	2039.5	-0.547555	0.126929	-4.31386	1.6043e-05	0.000299742
Eef1d	1586.24	0.356403	0.0826901	4.31011	1.63177e-05	0.000304529
Degs1	1293.58	0.440161	0.102164	4.30836	1.64468e-05	0.000306248
AABR07030544.1	198.624	0.750283	0.174139	4.30852	1.64354e-05	0.000306248
Ccl28	8.00632	-5.6816	1.31989	-4.30459	1.67295e-05	0.000311161
Itpr3	95.2524	-1.37142	0.318842	-4.30125	1.69841e-05	0.000315542
L3mbtl3	179.605	0.762215	0.177226	4.30081	1.70175e-05	0.000315807
Nampt	1136.29	0.655154	0.152384	4.29936	1.71296e-05	0.000317531
Pla2g6	312.573	0.685757	0.159619	4.29621	1.73745e-05	0.00032171
Trim46	12.8651	-2.91439	0.678778	-4.29359	1.75808e-05	0.000325166
St6galnac4	452.363	-1.2033	0.280322	-4.29257	1.76618e-05	0.000326299
Ufc1	1574.47	-0.40894	0.0952914	-4.29146	1.77498e-05	0.00032756
Ccl24	168.401	1.26015	0.2939	4.28768	1.80551e-05	0.000332822
Plpp2	411.338	-0.830305	0.193676	-4.28708	1.81038e-05	0.000333348
Abca1	2729.2	0.546858	0.127601	4.28569	1.82176e-05	0.000335069
Nr1h5	29.2126	1.48107	0.345656	4.28481	1.82897e-05	0.000336023
Tmc5	16.2357	-3.3352	0.77844	-4.28447	1.83174e-05	0.000336157
Cpa2	338.096	1.88099	0.439431	4.28051	1.86467e-05	0.000341822
Acox2	10407.8	0.516629	0.120754	4.27835	1.88285e-05	0.000344772
Tspan33	470.512	-0.634804	0.148475	-4.27549	1.90716e-05	0.000348836
Acyp2	34.3093	-1.74235	0.407581	-4.27487	1.91248e-05	0.000349423
Lasp1	3494.38	-0.414411	0.0969611	-4.27399	1.92009e-05	0.000350426
Glrx	1282.84	0.623043	0.145806	4.27309	1.92781e-05	0.000351447
Acot2	383.837	1.41762	0.331824	4.2722	1.93553e-05	0.000352467
Zmynd15	33.694	-1.98818	0.465634	-4.26983	1.9562e-05	0.000355839
Ergic1	662.264	0.556043	0.130363	4.26534	1.99601e-05	0.000362681
RF00002	51.9677	-2.45242	0.575213	-4.26349	2.01255e-05	0.000365285
Cwc15	873.236	0.58285	0.136721	4.26305	2.01654e-05	0.000365609
Pdk2	2327.8	0.540018	0.126815	4.25832	2.05971e-05	0.000373026
Rrs1	299.92	0.819275	0.19243	4.25752	2.06704e-05	0.000373944
Aldoc	28.2255	-1.85564	0.435947	-4.25658	2.07573e-05	0.000375106
Adra1d	4.69098	-5.82703	1.37076	-4.25095	2.12868e-05	0.000384254
Hrct1	36.6822	-1.76361	0.415022	-4.24943	2.14316e-05	0.000386447
Rnd3	761.779	0.64161	0.151091	4.24652	2.17114e-05	0.000390984
Ankrd49	356.134	0.568269	0.133833	4.24611	2.17511e-05	0.000390984
Cldn7	49.6216	-1.65032	0.38867	-4.24608	2.17542e-05	0.000390984
Ubxn4	2116.9	0.454224	0.107	4.2451	2.18491e-05	0.000392264
Dynll2	2359.95	-0.433079	0.102049	-4.24384	2.19726e-05	0.000393627
Hp	218907	-0.643415	0.151608	-4.24395	2.1962e-05	0.000393627
Brd3	806.62	0.679283	0.160103	4.2428	2.2075e-05	0.000394179
LOC100365958	1612.75	-1.09117	0.25717	-4.243	2.2055e-05	0.000394179
Clip1	717.213	0.476143	0.112215	4.24315	2.20408e-05	0.000394179
Glod5	45.7112	-2.11948	0.499757	-4.24103	2.22494e-05	0.000396438
Dgat1	637.772	-0.529206	0.124779	-4.24116	2.22367e-05	0.000396438
Tma7	623.041	0.695103	0.163929	4.24028	2.23246e-05	0.000397349
Cib1	733.865	-0.433601	0.102296	-4.23869	2.24824e-05	0.000399727
Fam124a	117.43	0.772086	0.182293	4.23543	2.2812e-05	0.000405152
B2m	29353.6	0.562001	0.132754	4.2334	2.30184e-05	0.00040838
AABR07071765.1	112.753	1.15252	0.27229	4.23269	2.30913e-05	0.000408795
Cfap70	53.4725	1.10162	0.260255	4.23286	2.30743e-05	0.000408795
Cbx7	97.2401	-1.34583	0.31807	-4.23123	2.32415e-05	0.000411015
Rnf103	1221.89	-0.530999	0.125569	-4.22874	2.35004e-05	0.000415148
Lmbr1l	129.229	-0.940976	0.222566	-4.22785	2.3594e-05	0.000416357
Fam149b1	551.041	0.57068	0.13502	4.22663	2.37219e-05	0.000418169
Plekhb1	793.176	0.920029	0.21769	4.22633	2.37531e-05	0.000418272
Pkp3	190.403	-1.02143	0.241866	-4.2231	2.40969e-05	0.000423875
Steap3	1421.06	0.904654	0.214263	4.22217	2.41958e-05	0.000425163
Serpina3m	5401.33	-0.897213	0.212557	-4.22105	2.43164e-05	0.000426828
Dtx3l	379.515	0.783492	0.185812	4.21659	2.48026e-05	0.0004349
Nfil3	1275.52	0.723982	0.171809	4.21388	2.51022e-05	0.000439688
Arhgap8	371.939	-0.905535	0.214917	-4.21342	2.51531e-05	0.000440112
Crp	71886.5	-1.048	0.248752	-4.21303	2.51963e-05	0.000440403
Slc25a21	84.5362	-1.34086	0.318451	-4.21057	2.5473e-05	0.000444769
Fgfr1op	181.633	-0.56839	0.135009	-4.21002	2.55344e-05	0.00044537
Vps52	1194.09	0.540071	0.128341	4.2081	2.57524e-05	0.0004487
Mustn1	32.5916	-1.78269	0.423711	-4.20732	2.58416e-05	0.000449307
Gfod2	56.1022	-1.18474	0.281582	-4.20744	2.58283e-05	0.000449307
Syt17	42.1342	-1.66188	0.395349	-4.20359	2.62715e-05	0.000456302
Vhl	236.784	-0.602986	0.143466	-4.20301	2.63394e-05	0.000457001
Lhpp	1846.76	0.75039	0.178587	4.20182	2.6478e-05	0.000458925
Fto	1121.46	0.401199	0.0954937	4.20131	2.65374e-05	0.000459472
LOC100362830	6266.47	0.447763	0.106676	4.1974	2.69992e-05	0.00046698
C8a	24471.6	0.502851	0.119892	4.19419	2.73845e-05	0.000472657
Nap1l1	1010.25	0.513854	0.122516	4.19419	2.73847e-05	0.000472657
Tmem128	314.046	-0.747313	0.178244	-4.19265	2.75714e-05	0.000475383
Lgals3	743.556	-1.05319	0.251232	-4.1921	2.76389e-05	0.000476052
Pdcd6	680.12	-0.502014	0.119897	-4.18706	2.82586e-05	0.000485796
Map1b	60.7685	-1.75597	0.419386	-4.18701	2.82656e-05	0.000485796
Mboat1	154.883	-1.23759	0.295594	-4.18679	2.82928e-05	0.000485796
Cdc42bpa	518.92	0.478478	0.114329	4.18509	2.85048e-05	0.000488928
Tacr1	9.91102	-4.40371	1.05239	-4.18447	2.85831e-05	0.000489764
Vegfb	264.248	0.849515	0.203033	4.18413	2.86264e-05	0.000489997
Tmem132c	12.2152	-4.09074	0.977749	-4.18384	2.86628e-05	0.000490113
Me1	1005.3	-0.883541	0.211207	-4.1833	2.87311e-05	0.000490774
L3mbtl2	565.734	-0.491168	0.117452	-4.18185	2.89145e-05	0.000493397
Hmgcl	2815.12	0.590464	0.141311	4.17847	2.93477e-05	0.000500272
AC095947.3	1141.31	0.980827	0.234834	4.17668	2.95799e-05	0.000503712
Tedc1	104.523	-0.984999	0.235906	-4.17539	2.97473e-05	0.00050604
RGD1560854	118.264	0.861386	0.20633	4.17481	2.98239e-05	0.000506822
AC094055.1	91.1278	1.59328	0.381744	4.17368	2.99722e-05	0.000507777
Als2cl	194.948	-0.778999	0.186645	-4.17369	2.99711e-05	0.000507777
Cep95	415.178	0.74931	0.179516	4.17406	2.99222e-05	0.000507777
Scube3	30.1511	-1.77379	0.425566	-4.16807	3.07192e-05	0.0005199
Cwc25	179.631	0.63846	0.153285	4.16519	3.11098e-05	0.000525971
Msrb1	1406.16	-0.506178	0.121538	-4.16477	3.11671e-05	0.000526402
St13	1955.61	0.540324	0.129763	4.16392	3.12834e-05	0.000527827
Fam83b	16.5125	-2.27859	0.547596	-4.16109	3.16733e-05	0.000533862
Dis3l2	346.79	0.520593	0.125164	4.15929	3.19235e-05	0.000537274
Rasl11b	52.7096	-1.4813	0.356154	-4.15917	3.19408e-05	0.000537274
Ppp1r14c	6.5218	-3.48327	0.837731	-4.15798	3.21077e-05	0.000539534
Nabp1	343.246	-1.06262	0.255733	-4.1552	3.25001e-05	0.000545573
Slc16a3	33.7628	-1.57309	0.37865	-4.15446	3.26052e-05	0.000546781
AABR07021492.1	5.47706	6.04305	1.45615	4.15002	3.32451e-05	0.000556949
AABR07052585.2	9.50693	-3.60531	0.869179	-4.14795	3.35468e-05	0.000561434
Muc13	7.87831	-5.52183	1.33154	-4.14694	3.36946e-05	0.000563337
Etnk1	1134.03	-0.469391	0.11322	-4.14584	3.38567e-05	0.000564905
Gdpd1	114.5	-0.988157	0.238338	-4.14604	3.38276e-05	0.000564905
Ftsj3	521.417	0.50485	0.121787	4.14534	3.39317e-05	0.000565586
Cltrn	17.2494	-1.74098	0.420119	-4.14401	3.41285e-05	0.000568293
Cox4i1	7682.54	-0.463687	0.111902	-4.14368	3.41779e-05	0.000568542
Mt-nd2	294823	0.801039	0.193383	4.14224	3.43929e-05	0.000571545
Prkcd	303.901	-0.785018	0.18957	-4.14105	3.45727e-05	0.000573955
Slco1a4	2304.75	-0.986829	0.238428	-4.1389	3.48977e-05	0.00057877
Pnpo	1325.22	-0.433956	0.104912	-4.13638	3.52835e-05	0.000584582
AABR07051450.1	22.1772	-1.88697	0.456277	-4.13558	3.54063e-05	0.000586028
Fam210b	1499.42	0.589964	0.142728	4.13349	3.57297e-05	0.000590791
Sars2	256.916	0.639255	0.154692	4.13245	3.58921e-05	0.000592882
Mrps2	853.3	0.57062	0.138146	4.13056	3.61873e-05	0.000597163
Clca4	9.4084	-4.78926	1.16089	-4.12552	3.69896e-05	0.000609187
Cxcl14	113.624	-1.66665	0.403982	-4.12556	3.69833e-05	0.000609187
Ildr1	22.0479	-1.9014	0.46112	-4.12344	3.73257e-05	0.00061411
Fads3	135.457	-0.869222	0.210937	-4.12076	3.77629e-05	0.000620685
Cwc27	185.198	0.618327	0.15008	4.11998	3.78908e-05	0.000621634
Slc16a1	2032.52	0.745434	0.180933	4.11995	3.78958e-05	0.000621634
Sumf1	460.106	-0.521733	0.126671	-4.11882	3.80823e-05	0.000624074
Clic6	5.09486	-6.85665	1.66629	-4.11491	3.87329e-05	0.000634108
Eef1a1	44952.2	0.489856	0.119066	4.11415	3.88611e-05	0.000635577
Foxe1	5.95876	-6.61604	1.60873	-4.11258	3.91268e-05	0.00063929
Mpv17l2	237.463	-0.661629	0.16094	-4.11102	3.93916e-05	0.000642981
Sema3a	73.6684	0.844029	0.205403	4.10913	3.97149e-05	0.000646981
Caprin1	2992.41	0.429282	0.104468	4.10921	3.9702e-05	0.000646981
Rpl12	3811.29	0.466595	0.113648	4.1056	4.03261e-05	0.000656292
Sf1	2729.63	0.476397	0.116133	4.10218	4.09283e-05	0.000665436
Usp20	250.853	-0.834422	0.203546	-4.09942	4.14182e-05	0.000672741
Syt13	10.4348	-3.31701	0.809194	-4.09915	4.14664e-05	0.000672863
Ankrd11	1938.29	0.382459	0.0933351	4.0977	4.17273e-05	0.000676431
Npm3	150.828	-0.708379	0.172989	-4.09494	4.2227e-05	0.000683863
Plxnb2	6835.22	0.343641	0.0839682	4.09251	4.2672e-05	0.000690393
AABR07034632.1	523424	0.459563	0.11234	4.09082	4.29846e-05	0.00069477
PCOLCE2	10.1641	-4.18146	1.02276	-4.0884	4.34356e-05	0.000701374
Prpf3	635.108	0.443961	0.108608	4.08774	4.35603e-05	0.000702702
Aprt	790.695	-0.478975	0.117349	-4.08164	4.47196e-05	0.000720701
Nars	1802.11	0.440086	0.107855	4.08033	4.49709e-05	0.000724045
Apoc2	23925.1	0.540556	0.1325	4.07966	4.51012e-05	0.000725436
Ncoa2	388.802	0.608904	0.149284	4.07883	4.52638e-05	0.000727344
Gls	216.663	-0.906869	0.222582	-4.07431	4.61507e-05	0.000740875
Klf16	171.363	-1.0714	0.263046	-4.07304	4.64029e-05	0.000744202
Cxadr	340.812	-0.695915	0.170923	-4.07152	4.67078e-05	0.000748366
RGD1305178	296.76	0.554501	0.136235	4.07017	4.69779e-05	0.000751837
Dhdds	1210.66	0.430079	0.105671	4.06999	4.70154e-05	0.000751837
Kdelc2	610.014	0.425414	0.104531	4.06975	4.70634e-05	0.000751878
Myrf	1092.23	-0.646964	0.159115	-4.06602	4.78224e-05	0.000763265
Igf2bp3	620.1	0.94257	0.231941	4.06384	4.82722e-05	0.000769702
Zmynd8	907.191	0.440125	0.108355	4.06188	4.86786e-05	0.000772771
Sdr16c5	5.87596	-5.52682	1.36064	-4.06191	4.86726e-05	0.000772771
RGD1561149	454.463	-0.944892	0.232636	-4.06168	4.87203e-05	0.000772771
Rbp7	27.5041	-1.82092	0.448214	-4.0626	4.85282e-05	0.000772771
AABR07063995.1	7.3201	-5.9243	1.45862	-4.06156	4.87451e-05	0.000772771
Vwa7	11.7299	-2.51916	0.620235	-4.06162	4.87341e-05	0.000772771
Vsig10	277.312	-0.828699	0.204061	-4.06105	4.88533e-05	0.000773745
Smim26	175.448	-0.790595	0.194702	-4.06053	4.89606e-05	0.000774701
Pah	15815.2	-0.651633	0.160495	-4.06015	4.90409e-05	0.000775231
Bcat1	14.1295	-3.04222	0.749356	-4.05978	4.91182e-05	0.000775711
Tspan7	2111.85	0.459285	0.113162	4.05864	4.93586e-05	0.000778763
H2afy	1737.27	0.321753	0.0792846	4.0582	4.94517e-05	0.000779489
Cry1	183.127	0.894819	0.220519	4.05779	4.95395e-05	0.00078013
Kif23	110.027	-0.971316	0.239578	-4.05428	5.02879e-05	0.000791161
Cnnm4	234.804	-0.670457	0.165468	-4.05189	5.08049e-05	0.000798536
St3gal6	1629.01	0.612798	0.151269	4.05105	5.09892e-05	0.000800671
Itih1	32835.4	0.464297	0.114634	4.05027	5.11582e-05	0.000802562
Cd72	20.3785	1.67808	0.414481	4.04864	5.15171e-05	0.000807427
Aco1	2901.17	0.484798	0.119773	4.04765	5.17343e-05	0.000810063
Pdlim4	82.37	-1.12094	0.276964	-4.04725	5.18236e-05	0.000810694
Apba2	71.6056	-3.78268	0.934801	-4.0465	5.19889e-05	0.000812511
Wdr47	62.2832	-1.12065	0.276995	-4.04574	5.21572e-05	0.000813473
Tp53inp2	5896.72	0.758855	0.187576	4.04558	5.21928e-05	0.000813473
Cygb	384.708	-0.885531	0.21889	-4.04556	5.21981e-05	0.000813473
Clic5	91.1604	-1.19821	0.296275	-4.04425	5.24919e-05	0.000817282
Tnfrsf1a	2117.32	-0.431329	0.10666	-4.04396	5.25566e-05	0.00081752
Mcpt1l1	43.7885	-2.09241	0.517933	-4.03993	5.34666e-05	0.000830894
Taf1d	191.839	0.636553	0.157653	4.03767	5.39841e-05	0.000838148
AABR07038873.1	64.3761	0.898209	0.222626	4.0346	5.4695e-05	0.000848388
Prkar1b	26.8439	-2.41822	0.599535	-4.03349	5.49554e-05	0.000851629
Hsd11b2	74.7535	-1.15329	0.286084	-4.03128	5.54728e-05	0.000858842
Nudc	281.769	0.681411	0.169437	4.02163	5.77977e-05	0.000893998
Btd	1394.66	0.411317	0.102306	4.02046	5.80846e-05	0.000897597
Sucnr1	15.7867	2.46363	0.612909	4.01958	5.8303e-05	0.000900131
Edem1	3256.05	0.732609	0.182317	4.01833	5.86129e-05	0.000904071
AABR07030926.1	73.5308	-1.27444	0.317403	-4.01519	5.93971e-05	0.000915314
Lcat	11888.2	0.534596	0.133215	4.01303	5.99451e-05	0.000922898
Set	1277.74	0.521209	0.129916	4.0119	6.02332e-05	0.00092647
RGD1306271	57.2286	-1.13437	0.282832	-4.01074	6.05278e-05	0.000930137
Tfg	1070.54	0.525385	0.131005	4.0104	6.06147e-05	0.000930608
Atp6v1b2	736.947	-0.509073	0.126994	-4.00865	6.10658e-05	0.000936663
Col4a5	326.138	-0.831194	0.207367	-4.00832	6.11527e-05	0.000937126
Nsa2	636.666	0.526333	0.131338	4.00746	6.13752e-05	0.000939448
Veph1	189.235	0.805733	0.201066	4.0073	6.14178e-05	0.000939448
Plxdc2	78.3399	-1.53151	0.382203	-4.00707	6.14759e-05	0.000939468
Repin1	1018.87	0.477775	0.119326	4.00396	6.22907e-05	0.000951041
Atp5md	895.184	-0.516356	0.129003	-4.00266	6.26347e-05	0.00095541
Tnfaip1	1566.18	-0.355695	0.0888748	-4.00221	6.27541e-05	0.000956349
Cct7	2229.44	0.314047	0.0784861	4.00131	6.29917e-05	0.000959086
Nqo2	652.929	0.558711	0.139735	3.99837	6.37795e-05	0.000970188
Arhgap42	437.299	0.617552	0.154489	3.99737	6.40489e-05	0.000973391
Rps16	6066.74	-0.418775	0.104812	-3.99551	6.45562e-05	0.000980199
Hnrnpr	226.724	0.639539	0.160092	3.99482	6.47445e-05	0.000982156
LOC301124	2945.09	-0.508587	0.127339	-3.99397	6.49764e-05	0.000984771
Aldh5a1	1645.6	0.445972	0.111684	3.99315	6.52017e-05	0.000986376
Mcm10	291.155	0.84865	0.212516	3.99334	6.51484e-05	0.000986376
Fam20c	819.049	-0.63196	0.158283	-3.9926	6.53528e-05	0.000987759
Snx8	522.543	0.43046	0.107854	3.99115	6.57537e-05	0.00099291
Mapk15	13.2977	-2.91106	0.729473	-3.99063	6.58993e-05	0.000994201
Trip6	311.916	-0.849102	0.212804	-3.99008	6.60522e-05	0.000995525
AABR07035796.1	44.5587	1.36013	0.340894	3.98988	6.61074e-05	0.000995525
Pof1b	7.62281	-2.95837	0.741557	-3.9894	6.62411e-05	0.00099663
Tubb2b	15.0052	-2.11136	0.529388	-3.98831	6.6545e-05	0.00100029
Sh3tc2	17.8114	-1.65151	0.414728	-3.98215	6.82933e-05	0.00102564
Nags	1632.84	-0.61589	0.154683	-3.98163	6.84439e-05	0.00102604
Eif1a	704.954	0.562996	0.141395	3.98172	6.8419e-05	0.00102604
Hsd3b7	1388.42	0.875449	0.219997	3.97937	6.90979e-05	0.0010349
Ccdc28b	146.332	-0.639067	0.160625	-3.97863	6.93126e-05	0.00103718
Tf	799615	-0.344089	0.0865828	-3.9741	7.06455e-05	0.00105617
LOC100910270	302.269	-0.942983	0.237302	-3.97376	7.07471e-05	0.00105673
Acy3	630.505	-0.719186	0.181031	-3.97271	7.10581e-05	0.00106042
Nipa1	37.5067	-1.49989	0.377587	-3.9723	7.11809e-05	0.00106129
Slc27a2	21037.6	0.628565	0.158268	3.97152	7.14166e-05	0.00106385
Ust5r	517.421	-2.82096	0.710413	-3.97087	7.16098e-05	0.00106505
Npc2	3197.88	-0.436667	0.109969	-3.97082	7.1626e-05	0.00106505
Mttp	5165.47	0.697239	0.17567	3.96902	7.21675e-05	0.00107021
Ccdc68	32.9972	-1.6451	0.414461	-3.96924	7.2103e-05	0.00107021
Cfb	34814.6	0.450202	0.113427	3.96909	7.21488e-05	0.00107021
AABR07024468.1	6.51619	3.81743	0.961994	3.96824	7.24042e-05	0.00107276
Net1	2262.65	0.763464	0.192464	3.96679	7.28486e-05	0.00107838
Bok	95.4478	-1.33964	0.337846	-3.96522	7.33274e-05	0.0010845
Myadm	1293.25	0.57158	0.144167	3.9647	7.34893e-05	0.00108592
Ifitm1	2236.07	0.477501	0.120472	3.96359	7.38298e-05	0.00108901
Naa80	874.795	-0.656229	0.165557	-3.96376	7.3779e-05	0.00108901
Prpf38b	1321.89	0.487561	0.123068	3.96173	7.44076e-05	0.00109602
Fmo3	4784.09	-0.825419	0.208353	-3.96164	7.44376e-05	0.00109602
Abca8a	3040.71	0.697413	0.176069	3.96101	7.46322e-05	0.00109772
Camsap3	334.125	-0.650637	0.164267	-3.96084	7.46864e-05	0.00109772
Tc2n	333.39	0.801276	0.202395	3.95896	7.52758e-05	0.0011054
Syvn1	1585.6	0.466058	0.117783	3.95691	7.59244e-05	0.00111394
Tpr	1133.8	0.419427	0.106033	3.95562	7.63364e-05	0.001118
Fhod1	334.943	0.535202	0.1353	3.95567	7.6319e-05	0.001118
Coro1a	244.055	-0.758264	0.191816	-3.95307	7.7154e-05	0.00112897
Pard6b	118.523	-0.857511	0.216981	-3.95201	7.74966e-05	0.00113299
Tnfaip2	510.782	-0.761579	0.192721	-3.95171	7.75935e-05	0.0011334
Timm22	339.47	-0.549717	0.139135	-3.95097	7.78351e-05	0.00113592
Dbp	497.764	-2.51079	0.635851	-3.9487	7.85757e-05	0.00114419
Dync2li1	37.0208	-1.45066	0.367387	-3.9486	7.86093e-05	0.00114419
Cxcr4	39.6373	-1.18322	0.299632	-3.9489	7.85108e-05	0.00114419
Vps13c	588.735	-0.774461	0.196184	-3.94761	7.89337e-05	0.00114791
Zfat	308.999	0.600789	0.152331	3.94397	8.01426e-05	0.00116242
Odf3b	161.362	1.13488	0.287739	3.94413	8.0091e-05	0.00116242
Rasal1	6.81184	-2.92142	0.740726	-3.944	8.01351e-05	0.00116242
Fuk	159.48	-0.747945	0.189732	-3.94212	8.07657e-05	0.00117043
Tmem171	19.0725	-1.71247	0.434606	-3.94028	8.1388e-05	0.00117842
Anxa4	1062.05	-0.705367	0.179025	-3.94004	8.14683e-05	0.00117855
Faf2	1080.37	0.362883	0.0921332	3.93868	8.193e-05	0.00118419
AABR07021008.1	10.2915	2.53393	0.643408	3.9383	8.20611e-05	0.00118505
Abraxas1	144.208	0.685839	0.174186	3.93739	8.23712e-05	0.00118849
Adamts16	26.8337	-1.37389	0.348967	-3.93702	8.24997e-05	0.0011893
Ifitm3	2627.25	-0.860358	0.218624	-3.93533	8.30814e-05	0.00119665
Psmf1	1465.79	0.528722	0.134399	3.93397	8.3555e-05	0.00120242
AABR07057423.1	20.0922	-1.56775	0.398724	-3.93191	8.4273e-05	0.0012117
Zcchc2	444.273	0.458655	0.116683	3.93079	8.46684e-05	0.00121633
Fbxl15	53.9903	-1.0268	0.261346	-3.92888	8.53433e-05	0.00122389
Tekt1	7.30612	-3.39938	0.865203	-3.929	8.53005e-05	0.00122389
AABR07006311.1	8.58269	5.20802	1.32586	3.92803	8.5643e-05	0.00122713
Sec16b	2214.15	0.46019	0.117175	3.92737	8.58815e-05	0.00122842
Fam149a	1147.29	0.52783	0.134394	3.92749	8.58356e-05	0.00122842
Taf15	108.38	-1.24754	0.317792	-3.92564	8.65006e-05	0.0012362
Tifa	121.195	-1.08857	0.277326	-3.92525	8.66414e-05	0.00123633
Smim3	88.38	1.04729	0.266812	3.9252	8.66591e-05	0.00123633
Gnas	4301.09	0.321913	0.0820744	3.92221	8.77403e-05	0.00125068
Aldh1a7	1097.88	-1.59977	0.407941	-3.92158	8.79701e-05	0.00125179
AC114233.2	311.574	-0.824963	0.210364	-3.9216	8.79629e-05	0.00125179
Akr1b1	294.042	-0.531649	0.135593	-3.92091	8.82156e-05	0.00125294
Cfap157	37.4982	-1.27976	0.326377	-3.9211	8.81466e-05	0.00125294
Ybx1	2640.57	0.474492	0.121021	3.92074	8.82779e-05	0.00125294
AABR07039448.1	85.6446	-0.986058	0.251553	-3.91988	8.85919e-05	0.00125524
Ckb	438.21	-0.639938	0.163252	-3.91994	8.85728e-05	0.00125524
Supt5h	1816.12	0.437174	0.111548	3.91917	8.88555e-05	0.0012579
Rnpep	423.206	-0.432641	0.110408	-3.91855	8.90821e-05	0.00126003
Ttc9c	239.36	-0.583912	0.149058	-3.91736	8.95242e-05	0.0012652
Fam198b	220.041	-0.785996	0.200663	-3.91699	8.9662e-05	0.00126606
Psca	24.9268	-2.34535	0.5988	-3.91674	8.97531e-05	0.00126627
Psen1	395.702	0.50289	0.128418	3.91603	9.00189e-05	0.00126796
Chrm3	14.4177	-2.00727	0.512581	-3.91601	9.00263e-05	0.00126796
Sectm1b	454.919	0.732491	0.187079	3.91541	9.02492e-05	0.00127002
Ablim3	430.994	0.846348	0.216191	3.91481	9.04758e-05	0.00127212
Trabd2b	14.1931	-2.52932	0.646181	-3.91426	9.06808e-05	0.00127392
Bspry	116.569	-1.10525	0.282418	-3.91352	9.09619e-05	0.00127679
Socs5	216.967	-0.622444	0.159101	-3.91226	9.14361e-05	0.00128235
Pctp	1877.8	0.637929	0.163107	3.91111	9.18743e-05	0.00128741
Ginm1	1009.42	-0.595914	0.15243	-3.90942	9.25187e-05	0.00129534
Cd24	173.39	-1.09482	0.28015	-3.90797	9.30731e-05	0.001302
Rab11fip1	270.819	-0.534916	0.136896	-3.90746	9.3273e-05	0.00130369
Snx9	478.312	0.436145	0.11168	3.90532	9.41017e-05	0.00131306
Gys1	147.197	-1.057	0.27065	-3.90542	9.40614e-05	0.00131306
Atg4d	603.118	-0.552946	0.141599	-3.905	9.42255e-05	0.00131367
Fam89a	362.028	-0.719666	0.184312	-3.90461	9.43787e-05	0.0013147
Nt5e	1711.82	0.467772	0.119826	3.90376	9.471e-05	0.00131821
Psmb5	1066.84	-0.341871	0.0876269	-3.90144	9.56215e-05	0.00132866
Smim7	651.223	-0.508664	0.130376	-3.90153	9.55883e-05	0.00132866
Maco1	770.696	0.40936	0.105091	3.8953	9.80773e-05	0.00135935
Gls2	5407.56	-1.02003	0.261851	-3.89548	9.8006e-05	0.00135935
MGC116121	192.776	-0.691275	0.177451	-3.89558	9.79623e-05	0.00135935
AABR07069219.1	24.9068	-1.85208	0.47578	-3.89273	9.91217e-05	0.00137153
Tspan15	91.9292	-0.81492	0.209339	-3.89282	9.90845e-05	0.00137153
Hopx	39.6293	-1.44559	0.371531	-3.89089	9.98787e-05	0.00137969
Slc41a1	200.498	-0.715488	0.18388	-3.89107	9.9804e-05	0.00137969
Srrm1	1544.3	0.483235	0.124302	3.88759	0.000101245	0.00139702
Tmem208	588.936	-0.43534	0.111986	-3.88745	0.000101302	0.00139702
H2afz	708.336	-0.759312	0.195397	-3.886	0.000101908	0.00140421
AC105662.2	13.1502	-2.83284	0.729544	-3.88303	0.000103165	0.00142034
Ssb	839.909	0.638366	0.164426	3.8824	0.000103433	0.00142284
Ppip5k2	1441.47	0.364348	0.0938541	3.88207	0.000103571	0.00142356
Impdh1	202.643	-0.671072	0.172884	-3.88163	0.000103757	0.00142494
Ppp1r11	694.783	0.409301	0.105456	3.88124	0.000103925	0.00142605
Frmd4b	762.249	0.578262	0.148998	3.88102	0.00010402	0.00142617
Nipa2	278.317	-0.609825	0.157246	-3.87815	0.000105255	0.00144191
Penk	18.473	-2.58859	0.667832	-3.87612	0.000106137	0.0014528
Slc20a2	1446.39	0.528874	0.136483	3.87502	0.000106614	0.00145812
Mnt	273.162	0.806966	0.208287	3.87431	0.000106928	0.0014612
Pnkd	4183.57	0.706205	0.182294	3.87398	0.000107071	0.00146194
Ywhab	2485.68	0.332018	0.0857207	3.87326	0.00010739	0.0014651
Pim3	665.371	-0.942733	0.243417	-3.87292	0.00010754	0.00146593
Tmem136	36.2133	-1.58242	0.408629	-3.8725	0.000107723	0.0014663
Trim25	658.545	0.627169	0.161956	3.87246	0.000107744	0.0014663
LOC688553	31.1406	-1.83664	0.474323	-3.87213	0.000107888	0.00146705
Cep85l	102.384	0.941132	0.243163	3.87037	0.00010867	0.00147646
Cbarp	30.9343	-1.41381	0.365521	-3.86793	0.000109762	0.00148894
Tspan17	10.4859	-3.34995	0.866087	-3.86792	0.000109768	0.00148894
Clk2	1863.35	0.380992	0.0985489	3.86602	0.000110628	0.00149937
RT1-DMa	13.274	-2.33068	0.602923	-3.86563	0.000110802	0.00150051
AABR07044711.1	28.0676	-1.52344	0.39415	-3.86513	0.000111029	0.00150235
Phldb1	291.6	-0.697766	0.180544	-3.8648	0.000111181	0.00150316
Plaa	924.349	0.511815	0.132442	3.86445	0.000111341	0.0015041
Fh	2724.43	-0.60886	0.157567	-3.86413	0.000111487	0.00150485
Slco1a1	1820.43	-0.600272	0.155364	-3.86366	0.000111702	0.00150651
Pter	189.266	-0.940606	0.243491	-3.863	0.000112002	0.00150934
Fbh1	982.873	-0.322558	0.0835296	-3.8616	0.000112645	0.00151677
Hlf	135.208	1.05744	0.274016	3.85905	0.000113829	0.00153146
Rps27l	814.776	-0.648283	0.168013	-3.85852	0.000114077	0.00153354
Mrpl23	1134.78	0.617718	0.160201	3.8559	0.000115304	0.00154752
MGC94207	952.863	0.480242	0.124543	3.85603	0.000115241	0.00154752
Gabrr3	31.2886	1.7051	0.442327	3.85485	0.000115802	0.00155294
Nectin4	7.18527	-3.15345	0.818642	-3.85205	0.000117132	0.00156951
Cftr	25.0442	-2.27885	0.5917	-3.85135	0.000117466	0.00157272
Cmip	432.914	0.496728	0.129027	3.84981	0.00011821	0.00158139
Bnip3	700.519	-1.03496	0.268912	-3.8487	0.000118744	0.00158725
Fam217a	21.6934	-2.10983	0.54851	-3.84647	0.00011983	0.00160048
B9d2	77.1088	-0.879988	0.228936	-3.84382	0.000121135	0.0016166
Actr1a	936.163	-0.405678	0.105593	-3.8419	0.000122088	0.001628
Zfp110	794.658	0.406007	0.105717	3.84051	0.00012278	0.00163591
Pear1	479.41	0.577221	0.15035	3.83917	0.000123451	0.00164221
Pelp1	641.704	0.455636	0.118681	3.83918	0.000123448	0.00164221
Ldlrad4	298.56	0.666448	0.173643	3.83804	0.000124019	0.00164844
Pex11a	335.038	1.10311	0.287448	3.8376	0.000124242	0.00165007
Lst1	127.333	-0.833478	0.217383	-3.83414	0.000126007	0.00167217
Atrn	4506.05	0.610059	0.159131	3.83369	0.000126234	0.00167353
Zhx3	430.996	0.765445	0.199671	3.83354	0.000126312	0.00167353
Ndufs3	1583.78	-0.367318	0.0958457	-3.83239	0.000126905	0.00168004
Vldlr	54.5585	-1.88749	0.492622	-3.83153	0.000127351	0.0016846
Padi1	2.9882	-5.73115	1.49638	-3.83001	0.000128139	0.00169367
Rbpms2	649.908	0.532356	0.139078	3.82776	0.000129315	0.00170785
Ndufaf2	156.758	0.840826	0.219713	3.82692	0.000129754	0.00171228
Pcdh12	274.967	0.750279	0.19608	3.8264	0.000130029	0.00171454
Il7	22.176	-2.16204	0.565309	-3.82452	0.000131027	0.00172632
Dele1	2483.48	0.386159	0.101004	3.8232	0.00013173	0.0017342
Crym	312.173	-1.02195	0.267535	-3.81986	0.000133525	0.00175504
Daam1	962.91	0.459301	0.120237	3.81997	0.000133467	0.00175504
Fhl2	135.735	-0.966464	0.253029	-3.81957	0.000133682	0.00175571
Rgl3	147.3	-1.19347	0.312672	-3.817	0.000135083	0.00177269
Inava	68.4734	-1.42986	0.374697	-3.81604	0.000135609	0.00177808
Kcnk5	434.174	-1.24323	0.325807	-3.81586	0.000135708	0.00177808
Fbxl7	57.6911	1.04706	0.274417	3.81558	0.000135865	0.00177872
Fam122a	189.796	0.554061	0.14526	3.81427	0.000136585	0.00178533
Plp2	163.338	-0.714936	0.187435	-3.81432	0.000136559	0.00178533
Terf1	172.807	0.788623	0.206769	3.81403	0.00013672	0.00178568
Eif4a2	2762.72	0.406305	0.106554	3.81315	0.000137209	0.00179064
Sdc3	1846.2	0.430331	0.112889	3.81199	0.000137854	0.00179764
Grid2ip	26.0225	-2.04307	0.536647	-3.80711	0.000140602	0.00183203
Il1a	149.649	0.868938	0.228318	3.80583	0.000141331	0.00184008
Rundc3a	27.2295	-1.40655	0.369615	-3.80543	0.000141557	0.00184158
Atp13a2	545.559	-0.481894	0.126667	-3.80441	0.000142145	0.00184777
Hook1	478.438	-0.480858	0.126418	-3.80372	0.000142536	0.00185141
Vps13d	1245.68	0.361535	0.0950683	3.8029	0.000143015	0.00185616
Ptpn13	292.528	-0.832942	0.219291	-3.79834	0.000145671	0.00188915
Kdm5c	944.166	0.479633	0.126294	3.79774	0.000146019	0.00189218
Slc5a9	7.16326	-5.22972	1.3773	-3.79708	0.000146411	0.00189577
Tradd	180.873	-0.765667	0.201661	-3.79679	0.000146581	0.00189649
Aacs	399.157	-1.61759	0.426104	-3.79623	0.000146911	0.00189928
Zc3h15	827.088	0.482646	0.127242	3.79312	0.000148768	0.00192027
AABR07032520.1	377.771	0.555549	0.146459	3.79321	0.000148712	0.00192027
AABR07018038.1	218.769	-0.756502	0.19979	-3.78648	0.000152799	0.00197077
Dcst1	59.5211	-2.84709	0.752565	-3.78318	0.000154836	0.00199393
Psap	13269.8	-0.212497	0.0561675	-3.78328	0.000154773	0.00199393
Pbx2	877.182	0.508335	0.134421	3.78167	0.000155781	0.00200454
Chrac1	280.563	-0.519366	0.137346	-3.78145	0.000155919	0.00200476
Naxe	739.819	0.395609	0.104699	3.77855	0.000157744	0.00202194
Mrrf	530.518	0.44946	0.118935	3.77902	0.000157446	0.00202194
Acot9	127.69	-0.815513	0.215817	-3.77872	0.000157635	0.00202194
Sec61g	875.937	-0.600707	0.158964	-3.77888	0.000157536	0.00202194
Mical2	373.936	0.665334	0.176239	3.77518	0.000159891	0.00204317
Zfp467	391.116	-0.936188	0.247986	-3.77516	0.000159903	0.00204317
Ephb2	37.9275	-1.63361	0.432661	-3.77572	0.000159545	0.00204317
Sdk2	39.0753	1.22009	0.323205	3.77498	0.000160018	0.00204317
Ist1	480.059	-0.418159	0.110761	-3.77533	0.000159798	0.00204317
Col24a1	20.4131	1.70841	0.452662	3.77414	0.00016056	0.00204851
Gnl3	846.91	0.552607	0.146461	3.77306	0.000161257	0.00205581
Cd99	628.432	-0.618555	0.163974	-3.77228	0.000161762	0.00206066
Nqo1	1162.36	-1.63817	0.43456	-3.76972	0.00016343	0.00208031
Duox2	9.05434	-3.17505	0.842472	-3.76873	0.000164078	0.00208595
Slc13a2	26.9723	-1.57132	0.416944	-3.76866	0.000164126	0.00208595
Mia2	3573.07	0.372029	0.09873	3.76815	0.000164464	0.00208864
Zfp36l1	4351.2	0.769086	0.204168	3.76693	0.000165269	0.00209725
Gca	38.1531	-1.31457	0.34904	-3.76624	0.000165722	0.00210139
Parp9	1079.76	-0.520643	0.138251	-3.76593	0.000165933	0.00210245
Col5a1	1066.09	0.607566	0.161396	3.76445	0.000166915	0.00211328
Dkk3	108.149	-1.25759	0.33413	-3.76378	0.000167362	0.00211578
Amigo1	123.74	-1.08439	0.288111	-3.76377	0.000167368	0.00211578
Csrp2	408.175	0.643128	0.170889	3.76343	0.0001676	0.00211708
Ikbkb	838.685	-0.328749	0.0873668	-3.76286	0.000167981	0.00212028
Txndc17	1270.24	-0.397902	0.105792	-3.76116	0.000169124	0.00213308
Marc2	4850.39	-0.279762	0.0743899	-3.76074	0.000169408	0.00213504
Slc7a8	144.929	0.672677	0.178937	3.7593	0.000170392	0.0021458
Gp2	3.7484	-6.86252	1.82575	-3.75874	0.000170769	0.00214727
Ccdc167	91.6276	0.959706	0.255318	3.75886	0.000170691	0.00214727
Larp7	633.433	0.451117	0.120153	3.75452	0.000173672	0.00218211
AABR07051507.1	904.128	-0.442876	0.117968	-3.7542	0.000173894	0.00218325
Sp2	194.009	0.51939	0.138381	3.75333	0.000174503	0.00218923
Tab2	1326.34	0.467534	0.124595	3.75242	0.000175137	0.00219411
Tbx4	10.6143	-2.8125	0.749523	-3.75239	0.000175157	0.00219411
Tle4	150.452	-0.690279	0.184041	-3.75067	0.000176361	0.00220752
Pnn	1259.67	0.47901	0.127775	3.74885	0.000177649	0.00222196
Slc29a3	281.325	-0.436221	0.1164	-3.7476	0.000178534	0.00223134
Slc35f5	627.35	-0.422352	0.112765	-3.74543	0.000180082	0.00224899
Heg1	365.89	-0.589418	0.157473	-3.74299	0.000181846	0.00226931
Ptk7	64.9029	-1.23762	0.330736	-3.74201	0.000182555	0.00227643
Serpine2	699.178	0.482227	0.128882	3.74163	0.000182828	0.00227812
LOC691083	372.221	0.734306	0.196263	3.74143	0.000182973	0.00227821
AC141969.1	14.6644	-2.0274	0.541952	-3.74092	0.000183345	0.00228112
AC141489.1	367.883	-0.935052	0.250008	-3.74009	0.000183951	0.00228694
Rtn2	52.352	-1.6524	0.441883	-3.73945	0.000184426	0.0022894
Dclre1b	211.494	0.545881	0.145975	3.73956	0.000184343	0.0022894
Ercc2	278.641	0.535694	0.143388	3.73598	0.000186984	0.00231941
Col14a1	1597.07	0.5743	0.153801	3.73405	0.000188426	0.00233555
Eif4enif1	300.628	0.57923	0.155177	3.73272	0.000189427	0.00234462
LOC100360750	111.526	0.852729	0.228448	3.7327	0.000189441	0.00234462
Igsf8	104.757	-0.935386	0.250614	-3.73237	0.000189686	0.00234589
Adam8	41.8654	-1.43359	0.384304	-3.73036	0.000191205	0.00236291
Tp53rk	53.8849	1.31594	0.352788	3.73011	0.000191393	0.00236326
Mybbp1a	909.959	0.528869	0.141794	3.72982	0.000191613	0.00236326
Nt5c	107.142	-0.757448	0.203082	-3.72976	0.000191662	0.00236326
Tbcd	640.863	-0.381911	0.102431	-3.72849	0.00019263	0.00237343
St5	1071.5	0.462433	0.124062	3.72743	0.00019344	0.00238164
Slc10a1	15016.4	0.498057	0.133644	3.72674	0.000193974	0.00238642
Agtr1a	2344.28	0.652761	0.175188	3.72605	0.000194502	0.00239114
Nes	27.9671	-1.36365	0.366036	-3.72545	0.00019497	0.00239512
Mtus1	2390.92	0.447655	0.120177	3.72497	0.000195336	0.00239784
Ak4	749.643	0.808832	0.217248	3.72308	0.000196807	0.00241409
Nxpe1	157.958	0.711677	0.191211	3.72194	0.000197697	0.00242142
Cdc42se2	305.708	-0.45422	0.122034	-3.72207	0.000197596	0.00242142
Adgrf5	1294.23	0.658092	0.176832	3.72156	0.000197992	0.00242188
AABR07044421.1	66.7034	1.51003	0.405757	3.72152	0.000198027	0.00242188
Pdgfc	99.3315	-0.964039	0.259141	-3.72014	0.000199113	0.00243156
Spata2L	371.213	1.10815	0.297878	3.72016	0.000199094	0.00243156
Carm1	501.624	0.491567	0.132182	3.71886	0.000200127	0.00244214
Ttr	197570	0.598764	0.161032	3.71829	0.000200576	0.00244581
Fbxw17	59.9179	-1.00706	0.270869	-3.71787	0.000200907	0.00244805
Cks1b	488.428	0.440636	0.118656	3.71356	0.000204365	0.00248469
Mmp16	77.7853	0.885488	0.238443	3.71362	0.000204316	0.00248469
Adgre1	581.216	0.734753	0.197847	3.71375	0.000204212	0.00248469
Spta1	12.6374	-2.48156	0.668374	-3.71284	0.000204947	0.00248994
Ms4a8	13.9509	-3.91453	1.05486	-3.71096	0.000206474	0.00250664
Luc7l2	1958.63	0.393958	0.106177	3.7104	0.000206931	0.00250738
Smim22	74.4261	-0.930415	0.250764	-3.71033	0.00020699	0.00250738
Gab1	137.63	0.746448	0.201165	3.71063	0.000206748	0.00250738
Igh-6	37.9453	3.30115	0.890428	3.70737	0.000209421	0.00253497
Gar1	179.308	0.560586	0.151233	3.70677	0.000209919	0.00253915
Atp5f1e	2968.37	-0.430215	0.116073	-3.70641	0.000210214	0.00254001
Irak3	216.973	-0.622386	0.167926	-3.70631	0.000210298	0.00254001
Afg3l1	933.878	0.40523	0.109342	3.70607	0.000210498	0.00254057
Cluh	8447.17	0.42267	0.114086	3.70484	0.000211524	0.00255109
Rpl13a	330.899	0.476418	0.128612	3.7043	0.000211975	0.00255467
Aldoa	2201.84	-0.667807	0.180358	-3.70268	0.000213335	0.00256732
St7l	189.145	-0.63362	0.171121	-3.70276	0.000213264	0.00256732
Tff3	231.669	-1.29237	0.349187	-3.70109	0.000214677	0.00258159
Ylpm1	606.132	0.418068	0.11297	3.7007	0.000215008	0.00258369
Timp3	247.828	-0.968946	0.261848	-3.70041	0.000215254	0.00258477
Twf1	672.241	-0.455089	0.123003	-3.69983	0.00021574	0.00258873
Arntl2	18.8932	-2.88012	0.778501	-3.69957	0.000215968	0.00258958
Ppid	535.511	0.592981	0.1603	3.69919	0.000216285	0.00259003
Eepd1	303.512	-0.619944	0.167591	-3.69915	0.000216319	0.00259003
Kctd5	409.133	-0.564524	0.152685	-3.69731	0.0002179	0.00260708
LOC100909548	328.788	-0.5903	0.159695	-3.69642	0.00021866	0.00261333
Rpl14	5406.91	0.352143	0.0952682	3.69633	0.000218739	0.00261333
Traf7	419.515	-0.438158	0.118603	-3.69433	0.000220466	0.00263206
Dtd1	204.052	-0.659557	0.178551	-3.69395	0.000220801	0.00263416
St6galnac2	79.5589	-1.03774	0.280979	-3.69331	0.000221355	0.00263887
Hspbap1	101.157	-0.679323	0.184066	-3.69065	0.00022368	0.00266466
AC133613.1	7.9688	-2.50807	0.679796	-3.68945	0.000224742	0.00267538
AABR07045405.1	30.8745	1.28446	0.348163	3.68925	0.000224912	0.00267548
Atp6v1h	471.342	-0.523409	0.141886	-3.68893	0.000225203	0.00267702
Rap1gap	62.7133	-1.38536	0.375654	-3.68785	0.000226157	0.0026827
Unkl	128.811	0.687784	0.186501	3.68784	0.000226168	0.0026827
Ccl2	26.7301	-2.6994	0.731922	-3.6881	0.000225938	0.0026827
Epha3	44.8363	-1.76099	0.477802	-3.6856	0.000228161	0.00270441
Cdr2	77.6355	-0.919671	0.249582	-3.68485	0.000228837	0.00271047
Ap3b1	944.493	0.464032	0.12594	3.68454	0.000229116	0.00271184
Rragd	18.245	-1.94944	0.529318	-3.68292	0.000230574	0.00272714
AC094053.1	1200.67	0.629677	0.170991	3.68252	0.000230936	0.00272773
Hsd11b1	6327.63	-0.621018	0.168648	-3.68233	0.000231112	0.00272773
Ces2g	433.567	-0.888539	0.241299	-3.68232	0.000231119	0.00272773
Mmachc	249.805	0.420262	0.114137	3.68209	0.000231329	0.00272826
Cacnb3	121.963	-0.864826	0.234911	-3.6815	0.000231861	0.0027325
Lonp1	2721.16	0.316857	0.0860713	3.68133	0.000232019	0.0027325
Tmc8	98.759	0.956563	0.259905	3.68043	0.000232837	0.00274019
Gpbar1	6.16672	-3.95055	1.07353	-3.67995	0.000233284	0.0027422
Cox19	547.819	-0.506325	0.137593	-3.67988	0.00023334	0.0027422
G3bp2	571.082	0.424547	0.11544	3.67765	0.000235396	0.0027644
Cds1	68.3419	-1.02836	0.279769	-3.67574	0.000237162	0.00278297
Eno3	63.855	-0.881755	0.239896	-3.67558	0.000237314	0.00278297
Sfta2	3.39791	-5.77623	1.57161	-3.67535	0.000237523	0.00278343
Apom	11150.9	0.458327	0.124709	3.67517	0.00023769	0.00278343
Zbtb21	378.574	0.574106	0.156284	3.67347	0.000239283	0.0028001
Pbdc1	352.407	0.648395	0.176682	3.66983	0.000242709	0.00283618
Tenm3	91.7143	-1.40921	0.383998	-3.66984	0.000242701	0.00283618
Lrrc75b	161.512	-0.918448	0.25034	-3.66881	0.000243684	0.00284556
LOC100362980	397.45	0.394016	0.107403	3.66857	0.000243912	0.00284621
Nudt22	133.498	-0.646805	0.176512	-3.66436	0.000247954	0.00289068
Tgfbi	6758.39	0.366659	0.100064	3.66424	0.000248072	0.00289068
Pofut1	505.011	0.513393	0.140122	3.66391	0.000248396	0.00289241
Arl4d	151.55	-1.17277	0.320281	-3.66168	0.00025057	0.00291568
Cebpz	568.89	0.324086	0.0885304	3.66073	0.000251495	0.00292438
Egfl6	24.1577	2.24114	0.612266	3.6604	0.00025182	0.00292611
Smim29	56.0983	-0.927301	0.253592	-3.65666	0.000255519	0.002967
AABR07065531.5	3080.98	2.00356	0.548045	3.65584	0.000256343	0.00297448
Mrpl28	521.383	-0.527688	0.144418	-3.65388	0.000258304	0.00299513
Sp140	306.668	-0.654924	0.179369	-3.65127	0.000260945	0.00302363
AABR07031735.1	240.172	0.767351	0.210213	3.65036	0.000261877	0.0030323
AABR07011062.1	5.1921	4.34728	1.19105	3.64997	0.000262268	0.00303472
Dock1	462.341	0.439859	0.120584	3.64775	0.000264546	0.00305723
Ostf1	590.068	-0.49261	0.135046	-3.64771	0.000264584	0.00305723
Pigk	965.687	-0.557795	0.15302	-3.64523	0.000267149	0.00308471
Rbm3	1462.88	-1.04136	0.285727	-3.6446	0.00026781	0.00309018
Anxa3	1246.81	-0.42356	0.116246	-3.64365	0.000268798	0.00309943
Ehd1	1743.91	0.399262	0.109584	3.64342	0.00026904	0.00310005
Ppp1r9b	494.822	0.504776	0.138569	3.64278	0.000269713	0.00310564
Rnf181	1073.68	-0.377429	0.10366	-3.64102	0.000271563	0.00312477
Rnf126	770.692	0.72174	0.198257	3.64042	0.00027219	0.0031298
Lamb2	528.852	-0.559109	0.1536	-3.64004	0.0002726	0.00313234
Ubald2	495.329	0.605337	0.166402	3.6378	0.000274978	0.00315748
Nradd	16.2829	-1.59748	0.439183	-3.63739	0.000275416	0.00316031
Arhgef7	1066.78	0.389223	0.107018	3.63699	0.000275838	0.00316295
Cbs	5260.87	-0.65767	0.180872	-3.6361	0.000276798	0.00317176
Lpin1	2050.35	1.33081	0.366506	3.63109	0.000282232	0.00323179
Ndufb2	1187.2	-0.446113	0.122882	-3.63043	0.000282947	0.00323774
Gjc2	37.3211	-1.65593	0.456234	-3.62956	0.000283908	0.00324648
Rbks	832.341	0.326208	0.0898954	3.62875	0.000284795	0.00325437
Plxnd1	1096.27	0.450618	0.124212	3.62781	0.000285837	0.00326189
AABR07057108.1	11.446	4.64	1.27901	3.6278	0.000285847	0.00326189
Rab5c	2156.45	0.367211	0.101261	3.6264	0.000287401	0.0032751
Taf6	702.145	0.418645	0.115441	3.62647	0.000287323	0.0032751
Galnt2	1369.8	0.431068	0.118885	3.62594	0.000287916	0.00327871
Sh3bgrl	338.217	0.674716	0.186109	3.62538	0.000288534	0.00328349
Hdgf	1485.71	0.340969	0.0940727	3.62452	0.000289496	0.00328882
LOC100360413	205.257	0.749841	0.206885	3.62443	0.000289599	0.00328882
Pgp	455.49	-0.724673	0.199926	-3.62472	0.000289279	0.00328882
Ilf3	497.471	0.397465	0.109674	3.62407	0.000289999	0.0032911
Zc3h12a	124.825	-0.764968	0.211191	-3.62216	0.000292153	0.00331327
Oaf	3421.08	-0.545735	0.150772	-3.61961	0.000295043	0.00334375
Pdia4	6059.84	0.512964	0.141729	3.61933	0.000295369	0.00334516
Dennd1a	489.821	0.456296	0.126103	3.61842	0.000296404	0.00335458
Fgl2	381.18	-0.575832	0.159174	-3.61763	0.000297311	0.00336025
Rsph9	94.9546	-1.06522	0.294449	-3.61769	0.000297241	0.00336025
Ttc21b	95.8685	-0.882682	0.244064	-3.61659	0.000298504	0.00337143
Sept11	484.851	0.509698	0.141107	3.61214	0.000303677	0.00342751
Slc39a9	1175.77	0.278849	0.0772118	3.61148	0.000304452	0.00343392
Nkiras1	132.347	-0.699798	0.193866	-3.60971	0.00030654	0.00345511
Reep5	1461.19	-0.574625	0.159249	-3.60833	0.00030817	0.00347111
Rgs4	107.014	-2.11212	0.58542	-3.60787	0.000308722	0.00347496
Erich5	34.3935	-1.74091	0.482598	-3.60738	0.000309305	0.00347743
Cyb5r4	433.605	-0.552997	0.153306	-3.60716	0.000309572	0.00347743
Phkb	322.667	0.574204	0.159178	3.6073	0.000309405	0.00347743
Gsta5	9456.73	0.754223	0.209103	3.60695	0.000309822	0.00347787
Syne4	28.2776	-2.9078	0.806431	-3.60577	0.000311231	0.00349001
Tmem200b	42.7059	-1.00674	0.279224	-3.60551	0.000311536	0.00349001
Dctn2	2619.03	-0.247084	0.0685276	-3.60561	0.000311418	0.00349001
Inmt	19.5614	-5.96639	1.65508	-3.6049	0.000312268	0.00349584
Dmgdh	6871.08	0.518116	0.143805	3.60289	0.000314694	0.00351866
Cma1	22.9871	-2.14315	0.594847	-3.60286	0.000314732	0.00351866
Tmem119	87.0716	-1.11299	0.308963	-3.60236	0.000315343	0.0035231
Slc35d2	461.127	-0.759021	0.210959	-3.59795	0.000320729	0.00358086
Dab2	427.678	0.636534	0.176945	3.59736	0.000321461	0.00358661
Cat	40419.8	0.648952	0.180443	3.59643	0.000322615	0.00359706
Glis3	27.7742	-1.9707	0.548091	-3.59557	0.000323683	0.00360625
Igf2bp2	126.782	0.910117	0.253133	3.59541	0.000323875	0.00360625
Sptan1	2510.97	-0.486463	0.135346	-3.59422	0.000325371	0.00361074
Cnrip1	97.2159	0.851998	0.23701	3.59478	0.000324666	0.00361074
Sacs	137.305	0.69124	0.192298	3.59463	0.000324858	0.00361074
Itih3	116520	-0.409315	0.113879	-3.5943	0.000325265	0.00361074
Mbp	64.5354	-1.25016	0.347803	-3.59444	0.00032509	0.00361074
LOC100362216	208.464	-0.812371	0.22614	-3.59234	0.000327726	0.00363444
Rpl23	6150.92	0.43639	0.121502	3.59164	0.000328604	0.00364173
Ythdc1	712.461	0.356566	0.0993041	3.59065	0.000329858	0.00365319
Rnaseh2a	497.733	-0.593982	0.165566	-3.58758	0.000333768	0.00369401
Bicc1	611.033	-0.768829	0.214342	-3.58693	0.000334597	0.00370071
Selenoh	406.937	-0.5228	0.145797	-3.58582	0.000336022	0.00371398
Fam13a	431.734	0.967137	0.269829	3.58426	0.000338033	0.00373371
B3galt1	728.362	0.903084	0.252053	3.58291	0.000339787	0.00375058
Prkx	173.999	-0.71229	0.19884	-3.58222	0.000340682	0.00375796
Mmaa	293.609	0.553603	0.154567	3.58164	0.000341442	0.00376383
Mmp14	1754.44	0.513974	0.143557	3.58027	0.000343234	0.00378106
Mfsd6	1246.79	0.485929	0.13579	3.57854	0.000345523	0.00380374
AABR07045400.1	24.8454	3.9315	1.099	3.57735	0.000347092	0.00381847
Actr2	626.634	-0.561315	0.156934	-3.57675	0.000347888	0.00382166
Mtmr9	379.311	-0.469794	0.131352	-3.57661	0.000348075	0.00382166
Ctif	750.224	0.640986	0.179215	3.57663	0.000348049	0.00382166
Tnni3	41.4355	1.30741	0.365684	3.57526	0.000349883	0.00383896
Bst2	3278.31	-0.948134	0.265237	-3.57466	0.00035068	0.00384516
Tmem141	185.628	-0.684779	0.191592	-3.57415	0.000351373	0.00384765
Gpr137b	93.7928	-0.806213	0.225566	-3.57418	0.000351333	0.00384765
Serpine1	121.179	-2.27781	0.637438	-3.57338	0.000352406	0.00385641
Rps21	1945.77	-0.506176	0.141825	-3.569	0.000358341	0.00391876
Cd4	643.072	0.460744	0.12917	3.56695	0.000361165	0.00394703
Sema3d	61.1993	0.967929	0.271416	3.56622	0.000362174	0.00395544
Acox1	11554.6	0.426847	0.119722	3.5653	0.00036344	0.00396665
Csnk1e	521.902	0.413991	0.116153	3.56417	0.000365006	0.00398112
AABR07039234.1	21.7134	1.44349	0.405162	3.56275	0.000366986	0.00400008
Fbxw9	268.706	-0.45512	0.127831	-3.56032	0.000370407	0.00403471
Snx11	479.555	-0.589299	0.165555	-3.55954	0.000371501	0.00404395
Pdlim7	275.303	-0.713555	0.200478	-3.55927	0.000371894	0.00404557
Wdr46	606.051	0.610081	0.171444	3.5585	0.000372983	0.00405475
Zmynd11	1051.54	0.361605	0.101647	3.55745	0.000374473	0.00406827
Mindy1	616.231	-0.390219	0.109779	-3.55459	0.000378563	0.00411
Shroom3	492.557	-0.676685	0.190404	-3.55394	0.000379507	0.0041157
Carhsp1	4749.18	0.360857	0.101539	3.55388	0.000379586	0.0041157
Optc	73.5092	1.0813	0.304358	3.55273	0.000381248	0.00413102
Chka	2024.54	0.553552	0.155827	3.55236	0.000381796	0.00413425
LOC103690028	86.9422	-2.47972	0.698107	-3.55207	0.000382216	0.00413608
Mdh1	4644.57	-0.40451	0.113915	-3.55098	0.000383792	0.00415043
Prelp	1074.63	1.34579	0.379026	3.55067	0.000384259	0.00415276
Rtn4r	7.35086	-2.70335	0.761408	-3.55046	0.000384559	0.00415329
Adh7	297.448	1.24636	0.351136	3.54951	0.000385948	0.00416557
Fabp5	3032.48	0.890427	0.250943	3.54832	0.000387696	0.00418171
Tbc1d10c	43.7114	-1.01727	0.286742	-3.54767	0.000388662	0.00418939
Med18	55.6106	0.988682	0.278793	3.5463	0.000390683	0.00420306
Arid5a	76.4859	-1.08852	0.306939	-3.54637	0.000390579	0.00420306
Tfap4	103.875	0.81773	0.230587	3.54629	0.000390693	0.00420306
Jade2	147.028	0.718331	0.2027	3.54381	0.000394386	0.00424003
Nsfl1c	1589.57	0.407174	0.114911	3.54338	0.000395031	0.0042442
Igfbp3	2503.43	0.749574	0.211637	3.5418	0.000397408	0.00426698
Hsf2	423.535	0.460174	0.12995	3.54117	0.000398351	0.00427433
Erbb2	17.6931	-2.22957	0.629801	-3.54012	0.000399946	0.00428866
Adipoq	29.2264	-7.18822	2.03064	-3.53988	0.000400316	0.00428984
Atxn7l1	300.622	0.573401	0.162002	3.53947	0.000400925	0.00429358
Uqcrc1	3091.96	-0.305305	0.0863411	-3.53603	0.000406191	0.00434667
Dnah8	10.9257	3.55821	1.00631	3.53589	0.000406407	0.00434667
Tuba1a	319.442	-0.758471	0.214531	-3.53549	0.000407013	0.00434752
Tmem163	43.5003	-1.40018	0.396025	-3.5356	0.000406857	0.00434752
Gsk3a	702.101	0.450962	0.127611	3.53388	0.000409515	0.00437142
Esm1	29.5862	-2.3956	0.678232	-3.53212	0.000412239	0.00439766
Fryl	324.334	0.487606	0.138081	3.5313	0.000413524	0.00440852
Rsrc2	746.792	0.394209	0.111672	3.53005	0.000415483	0.00442655
Stc1	15.5412	-1.8604	0.527132	-3.52928	0.000416687	0.00443652
Fcamr	10.5365	-4.90905	1.39114	-3.52879	0.000417471	0.00444201
Rab34	319.819	-0.60831	0.172401	-3.52846	0.000417989	0.00444467
Noc3l	159.411	0.589646	0.167133	3.52801	0.000418698	0.00444648
Gcat	842.569	-0.512014	0.145126	-3.52805	0.000418626	0.00444648
Tax1bp3	513.168	-0.459902	0.130384	-3.52729	0.00041984	0.00445574
Sec16a	2661.59	0.276512	0.0784175	3.52616	0.000421637	0.00447194
F8	324.644	0.544752	0.154519	3.52548	0.000422723	0.00448059
Fgf19	4.01029	-5.42368	1.5385	-3.5253	0.000422996	0.00448062
Kndc1	10.9187	-2.82415	0.801325	-3.52436	0.000424512	0.00449379
AABR07063855.1	451.453	0.473557	0.134386	3.52385	0.000425327	0.00449667
Tbx3	136.731	-1.02148	0.289876	-3.52386	0.000425314	0.00449667
Uqcrq	3611.42	-0.368742	0.104658	-3.52331	0.000426198	0.004503
Magix	144.001	0.760662	0.216001	3.52157	0.000429003	0.00452973
Kdm2a	1689.4	0.302336	0.0858777	3.52054	0.000430661	0.00454434
RF00438	13.4353	1.93956	0.551047	3.51977	0.00043192	0.00455471
Calcb	3.26344	-6.18092	1.75668	-3.51852	0.000433963	0.00457335
Rap1gap2	66.4709	-1.0018	0.284805	-3.51748	0.000435657	0.00458827
Tmco6	166.117	-0.665639	0.189257	-3.51712	0.000436257	0.00459167
Ptms	16593.5	0.521029	0.148189	3.51598	0.000438132	0.00460847
Nop58	551.188	0.535779	0.152391	3.51581	0.000438415	0.00460852
AABR07001099.2	216.856	0.561763	0.159806	3.51529	0.000439276	0.00461463
Kdm3b	790.002	0.370461	0.105424	3.51402	0.000441383	0.00462794
Gadd45gip1	902.603	0.478448	0.136142	3.51432	0.000440881	0.00462794
Kdm2b	380.648	0.402011	0.114398	3.51414	0.000441178	0.00462794
Vapb	503.587	0.346588	0.098718	3.51089	0.000446609	0.00467977
Cyb561a3	264.197	-0.554913	0.158081	-3.51031	0.000447591	0.00468709
F9	10940.9	0.453584	0.129361	3.50636	0.000454283	0.00475416
Zbed3	601.878	0.430356	0.122757	3.50576	0.000455302	0.00476181
Mmp24	246.704	0.745023	0.212542	3.50531	0.000456083	0.00476696
Asap1	381.817	0.620812	0.177125	3.50493	0.00045672	0.0047706
Lman1	1185.28	0.611465	0.174524	3.50362	0.000458986	0.00479125
Ywhaz	1877.32	-0.412182	0.117685	-3.50242	0.000461053	0.00480978
AABR07065113.1	64.1601	0.806785	0.230382	3.50194	0.000461876	0.00481534
Col12a1	216.934	-0.988151	0.282209	-3.50149	0.00046267	0.00481942
Orai2	67.8528	-0.908498	0.259468	-3.50138	0.000462851	0.00481942
Cyp2c24	12.2763	-4.75286	1.35788	-3.50022	0.000464877	0.00483748
Huwe1	1648.49	0.338428	0.0967017	3.49971	0.000465767	0.00484084
Smarcc2	1322.09	0.545747	0.155941	3.4997	0.000465787	0.00484084
Lamtor5	582.922	-0.42482	0.121431	-3.49845	0.000467976	0.00486054
Hist1h4m	458.113	0.808887	0.231253	3.49784	0.000469037	0.0048685
Abcb4	4222.76	0.581107	0.16616	3.49727	0.000470051	0.00487597
LOC100363452	443.197	-0.483776	0.138356	-3.49661	0.000471206	0.00488488
Bcl2l14	10.9021	-2.14453	0.613784	-3.49395	0.000475927	0.00493073
Tdo2	7058.39	-1.59581	0.456852	-3.49305	0.000477542	0.00494437
Tshr	49.1284	1.68189	0.481638	3.49203	0.000479371	0.00495957
Pts	208.917	-0.621455	0.177971	-3.49189	0.00047961	0.00495957
AABR07026058.1	157.81	-0.788491	0.225868	-3.49094	0.00048132	0.00497415
Irf2bp2	780.684	0.658819	0.188754	3.49035	0.00048239	0.00498209
Il17re	45.9708	-1.41115	0.404387	-3.4896	0.000483745	0.00499296
Aqp9	3872.8	-0.445601	0.127719	-3.48893	0.000484965	0.00500243
AABR07015057.1	1208.51	-1.70342	0.488323	-3.4883	0.000486111	0.00501113
Zfp113	52.8188	0.967172	0.277371	3.48693	0.000488607	0.00503372
Ergic2	1039.53	0.385139	0.110501	3.48539	0.000491411	0.00505946
Szrd1	1804.14	0.27888	0.080043	3.48413	0.000493748	0.00508035
RGD1560015	619.856	0.749162	0.215068	3.48337	0.000495146	0.00508938
Lrrn4	64.3802	1.94013	0.556986	3.48327	0.000495336	0.00508938
Khdrbs3	89.1816	0.815988	0.234267	3.48315	0.000495549	0.00508938
Ppt1	453.459	-0.484294	0.13905	-3.48288	0.000496045	0.00509131
Stat5b	518.949	0.493037	0.14158	3.4824	0.00049695	0.00509743
Mvp	1315.75	-0.385176	0.110676	-3.48022	0.000500993	0.00513254
Sult1b1	3872.26	-1.8046	0.518514	-3.48033	0.000500804	0.00513254
Ldhb	293.997	-0.901271	0.25904	-3.47927	0.000502789	0.00514775
Hs2st1	537	-0.463105	0.13314	-3.47833	0.000504548	0.0051603
AABR07030914.1	11.4664	-2.12083	0.609734	-3.47828	0.000504639	0.0051603
Cyr61	207.676	-1.12035	0.322129	-3.47794	0.000505284	0.00516371
Il6r	3339.56	0.564356	0.162295	3.47735	0.000506399	0.00516871
Adcyap1r1	114.971	1.09533	0.31499	3.47737	0.000506364	0.00516871
Mrps9	904.694	0.372328	0.107131	3.47543	0.000510038	0.00519646
Gata4	744.636	0.520017	0.149627	3.47542	0.000510061	0.00519646
Tecr	3881.48	0.639773	0.184073	3.47564	0.000509628	0.00519646
Nop2	428.272	0.61729	0.177669	3.47439	0.00051201	0.00521311
Cdc42se1	1139.6	-0.409684	0.117921	-3.47422	0.000512339	0.00521325
Spg7	584.752	0.446144	0.128423	3.47402	0.000512722	0.00521393
Aldh9a1	3546.94	0.464586	0.133772	3.47296	0.00051475	0.005229
Lyrm4	177.047	0.554951	0.159794	3.47292	0.000514836	0.005229
AABR07068694.1	131.783	1.32686	0.382167	3.47193	0.00051673	0.00524502
LOC100366030	15.2451	1.70246	0.4904	3.47156	0.000517438	0.00524898
Birc2	727.224	-0.497487	0.143337	-3.47076	0.000518992	0.00525829
Psmd9	491.208	-0.641946	0.184951	-3.4709	0.000518717	0.00525829
Amacr	5032.66	0.696324	0.200659	3.47019	0.000520086	0.00526615
Aif1	718.234	-0.5209	0.150137	-3.46949	0.000521445	0.00527668
Abcc9	631.007	-0.791975	0.228299	-3.46902	0.00052236	0.0052827
Tmem8a	170.924	-0.876591	0.252829	-3.46714	0.000526031	0.00531658
Rrbp1	10184.3	0.565811	0.163205	3.46688	0.000526543	0.0053185
Rmi1	453.163	0.415609	0.119936	3.46524	0.000529757	0.0053477
Dcun1d1	264.424	0.497155	0.143506	3.46435	0.00053151	0.00536212
Ctbp1	1294.41	-0.312838	0.0903295	-3.4633	0.000533588	0.00537981
Alkbh6	12.7636	2.216	0.639889	3.4631	0.000534	0.00538067
Diexf	196.094	0.570232	0.16474	3.46141	0.000537345	0.00541108
Ostc	2460.96	0.476051	0.137572	3.46037	0.000539428	0.00542206
Mmrn1	32.2585	-2.02471	0.585102	-3.46044	0.0005393	0.00542206
Dennd3	130.568	-0.69361	0.200453	-3.46021	0.000539756	0.00542206
Ncl	4028.48	0.428762	0.12392	3.45999	0.000540205	0.00542206
Dsg1	14.1481	-4.05114	1.17081	-3.46011	0.000539953	0.00542206
Ttyh3	1003.97	0.343679	0.0993325	3.45989	0.000540403	0.00542206
Dqx1	88.5947	-0.841772	0.243326	-3.45944	0.000541293	0.00542441
Hsp90b1	13104.8	0.502439	0.145233	3.45953	0.00054111	0.00542441
Fcer1g	940.788	0.533588	0.154266	3.45887	0.00054244	0.00543262
LOC100134871	2972.09	-1.15602	0.334253	-3.45853	0.000543122	0.00543615
Tor2a	1075.47	-0.398304	0.115178	-3.45817	0.000543854	0.00544019
Bmp2	296.506	0.617	0.178492	3.45674	0.000546745	0.0054658
Bad	265.952	-0.533437	0.154372	-3.45552	0.000549229	0.00548731
Fmo5	3929.04	-0.598039	0.173107	-3.45473	0.000550852	0.0055002
Pld1	377.724	-0.544722	0.157682	-3.45456	0.000551201	0.00550037
LOC100909712	1129.94	0.442822	0.128209	3.4539	0.000552552	0.00551053
Glyatl2	1992.33	0.571415	0.16548	3.45307	0.00055425	0.00552243
Gstm2	10451.4	-0.671821	0.194569	-3.45287	0.000554657	0.00552243
Acacb	2178.37	-0.668929	0.193734	-3.45283	0.000554748	0.00552243
Cdipt	769.419	-0.410205	0.118817	-3.45239	0.000555638	0.00552797
Pkm	288.993	-0.583572	0.169076	-3.45153	0.000557423	0.00554239
RT1-M2	73.9199	1.52123	0.440903	3.45026	0.00056004	0.00556506
Scpep1	1747.09	0.399791	0.11596	3.44766	0.000565456	0.00561551
Tank	262.859	0.540266	0.156732	3.44706	0.000566721	0.00562468
Clca5	6.34953	-3.78535	1.09829	-3.44659	0.000567717	0.00563119
Lrba	934.246	0.401149	0.116398	3.44636	0.000568188	0.00563249
Pitpnm2	836.354	0.463987	0.134659	3.44564	0.000569705	0.00564414
Dpf3	63.8136	1.1407	0.33124	3.44374	0.000573733	0.00568064
Prkab2	91.0215	-0.803415	0.233329	-3.44328	0.000574711	0.00568692
Prkag2	349.647	0.4473	0.129912	3.4431	0.000575085	0.00568722
Col22a1	14.4157	-2.03161	0.590387	-3.44114	0.000579258	0.00572507
Furin	8086.29	0.304723	0.0885572	3.44098	0.000579616	0.00572518
Cyp2b2	2952.84	1.45727	0.42354	3.4407	0.000580205	0.00572758
Vrk3	634.657	-0.347761	0.101081	-3.44043	0.000580789	0.00572992
Gemin2	134.389	-0.625401	0.181825	-3.43957	0.000582643	0.00574025
Mbd6	1723.35	0.502088	0.145979	3.43946	0.000582878	0.00574025
Marveld3	30.6627	-1.35878	0.395049	-3.43952	0.000582744	0.00574025
Bche	314.334	0.955828	0.277976	3.43852	0.000584901	0.00575675
AABR07053509.2	19.0768	2.07917	0.604769	3.43795	0.000586128	0.0057654
Fmod	83.8024	1.61342	0.469513	3.43636	0.000589582	0.00579592
Dpt	5953.03	-0.688178	0.200338	-3.43508	0.000592373	0.0058199
Nprl2	338.593	0.466275	0.135762	3.43451	0.00059362	0.00582869
Ppic	180.444	-0.833414	0.242739	-3.43337	0.000596118	0.00584974
Tagln2	2283.82	-0.48041	0.140007	-3.43133	0.000600621	0.00589043
Serpinh1	1731.64	0.471975	0.137632	3.42926	0.000605229	0.00592859
Agpat3	2551.35	0.633854	0.184833	3.42932	0.000605086	0.00592859
Gria3	169.117	1.11805	0.326111	3.42842	0.000607115	0.00594354
AC094643.2	515.134	0.556186	0.162245	3.42806	0.000607913	0.00594784
Cdc25c	98.6866	-0.641131	0.187075	-3.42713	0.000609997	0.00596369
Pttg1ip	7945.59	0.290413	0.0847424	3.42702	0.000610255	0.00596369
Gdf11	170.574	-2.16884	0.633136	-3.42555	0.000613546	0.00598878
Tmem14c	2023.31	-0.418099	0.122048	-3.42569	0.000613245	0.00598878
Tspan2	33.0662	-1.59293	0.465214	-3.42408	0.000616895	0.00601791
Ppme1	465.54	0.471922	0.137838	3.42375	0.000617637	0.0060216
AABR07004397.2	137.865	0.952889	0.278365	3.42317	0.000618954	0.00602597
Rab5if	1560.18	-0.33884	0.098989	-3.42301	0.000619325	0.00602597
Fxyd6	440.48	0.548587	0.160269	3.42291	0.000619544	0.00602597
Rbpms	678.939	0.515146	0.150497	3.42296	0.000619434	0.00602597
Arhgap18	306.978	0.671996	0.196362	3.42222	0.000621109	0.00603765
AABR07059232.1	21.9279	1.48187	0.433073	3.42175	0.000622188	0.00604458
Isx	5.34807	-4.091	1.19585	-3.42098	0.00062395	0.00605814
Pdgfa	59.9932	-1.04914	0.306694	-3.42082	0.000624335	0.00605832
Ralgps1	116.449	-0.633906	0.18554	-3.41654	0.000634224	0.0061494
Cyp8b1	3416.45	-1.96188	0.574247	-3.41644	0.000634465	0.0061494
Dlk1	15.0956	1.86397	0.545644	3.41609	0.000635261	0.00615351
Rgs7	37.8349	0.981402	0.287313	3.41579	0.00063597	0.00615519
Tma16	44.705	1.0074	0.294932	3.4157	0.000636179	0.00615519
Ache	59.0626	0.811933	0.237778	3.41467	0.000638588	0.00617488
Bcl6b	443.176	0.794743	0.232877	3.41272	0.000643172	0.00621557
Fhad1	8.83973	-2.39863	0.703515	-3.40949	0.000650846	0.00628606
Vps72	371.919	0.411688	0.120762	3.40908	0.000651823	0.00629182
Mrps21	783.83	0.460353	0.135058	3.40855	0.00065308	0.00630028
Jpt1	337.037	-0.496016	0.145531	-3.40831	0.00065367	0.00630229
LOC108348064	48.7875	-1.21295	0.355917	-3.40795	0.000654535	0.00630328
Wdr1	1301.83	-0.367308	0.107778	-3.40799	0.000654423	0.00630328
Avpi1	269.002	-0.619194	0.181772	-3.40644	0.000658164	0.00633411
Prkab1	2247.37	0.525974	0.154412	3.4063	0.000658503	0.00633411
Mybphl	2.03944	-5.06083	1.48592	-3.40585	0.000659574	0.00634073
Rhod	604.566	-0.490067	0.143914	-3.40527	0.00066099	0.00635065
Ddx39a	312.522	-0.560794	0.164755	-3.4038	0.000664552	0.00638116
Cst3	2652.78	0.434329	0.127621	3.40328	0.00066582	0.00638963
Rapgef4	612.338	0.672635	0.197684	3.40258	0.00066753	0.00640233
RT1-A1	1145.65	-0.595976	0.175164	-3.40238	0.00066801	0.00640321
Zc2hc1a	55.0012	-0.868594	0.25539	-3.40104	0.000671291	0.00643094
Cavin1	675.301	-0.639627	0.18811	-3.40029	0.000673151	0.00644502
Etfrf1	255.03	0.681526	0.20048	3.39947	0.000675176	0.00646067
Fbxw2	1439.06	0.326097	0.0959795	3.39758	0.000679858	0.00650171
Rad23b	3868.8	0.374076	0.110151	3.39603	0.000683712	0.00653478
Mrps16	694.635	-0.526455	0.155044	-3.39553	0.000684968	0.00654301
Stx1b	31.5937	1.36709	0.40272	3.39464	0.000687185	0.0065604
Cdh17	154.094	-1.83365	0.540624	-3.39173	0.000694531	0.0066267
Ush1c	7.34549	-3.86409	1.13964	-3.39062	0.000697355	0.00664981
Csrnp2	69.9322	-0.908681	0.268063	-3.38981	0.00069942	0.00666565
Eif1	2776.48	-0.457462	0.13496	-3.3896	0.000699942	0.00666678
Atp6v1b1	6.01357	-3.53297	1.04331	-3.38631	0.000708397	0.00673741
Utp11	363.411	0.429802	0.126917	3.38647	0.00070797	0.00673741
Jak3	383.029	-0.576437	0.170229	-3.38624	0.000708579	0.00673741
Negr1	34.8105	1.3314	0.393367	3.38462	0.000712762	0.00676551
Sdc2	10766.6	0.37479	0.110725	3.38486	0.000712148	0.00676551
Asgr2	6897.47	0.450225	0.133019	3.38467	0.000712644	0.00676551
Uqcrfs1	2467	-0.339386	0.100288	-3.3841	0.000714114	0.00677445
Jag1	99.2463	-1.04618	0.309235	-3.38313	0.000716651	0.00679462
Efna3	4.54064	-4.61314	1.36379	-3.38259	0.000718056	0.00680405
S100a10	508.247	-0.840983	0.248723	-3.3812	0.000721701	0.00683466
Psmb1	2343.67	-0.352291	0.104205	-3.38074	0.000722897	0.00684208
Tmc4	24.3714	-1.6003	0.473442	-3.38015	0.000724467	0.00685301
Rpl22l1	442.488	-0.935273	0.276741	-3.37959	0.000725933	0.00686295
LOC108348302	86.2768	0.744326	0.220437	3.37659	0.000733906	0.00693436
Atf7ip	532.917	0.538962	0.159688	3.3751	0.000737889	0.00696801
Cybrd1	85.6617	0.886706	0.262736	3.3749	0.000738438	0.00696922
Tmem209	384.231	0.510406	0.15127	3.37415	0.000740447	0.00698419
LOC288913	685.712	-0.454274	0.134699	-3.3725	0.00074488	0.007018
Aldh2	21729.7	0.334897	0.0992986	3.37263	0.000744547	0.007018
Grem2	267.466	-1.16574	0.345718	-3.37195	0.00074638	0.00702813
Btc	10.8054	-2.32547	0.689784	-3.3713	0.000748147	0.00704075
Vnn1	450.037	0.633447	0.187968	3.36998	0.00075174	0.00706653
Dap3	564.61	-0.367564	0.109066	-3.37009	0.000751429	0.00706653
Cyp26a1	65.3794	1.77821	0.527744	3.36945	0.000753173	0.00707598
Sestd1	117.214	-0.93346	0.277315	-3.36607	0.000762475	0.0071593
Mrps26	727.334	0.429381	0.127609	3.36481	0.000765962	0.00718796
Tns4	19.0067	-3.06289	0.910324	-3.36462	0.0007665	0.00718893
Tanc1	657.227	0.553641	0.164614	3.36327	0.000770261	0.0072201
Brd4	1575.55	0.433747	0.128992	3.36259	0.000772145	0.00723366
Ttll5	160.689	0.743336	0.221131	3.36152	0.000775148	0.00725769
Mad2l2	188.601	-0.709745	0.211176	-3.36092	0.000776821	0.00726924
Glyat	2645.9	-1.14995	0.342181	-3.36064	0.000777629	0.00727268
Dtx4	160.691	-0.551945	0.164274	-3.3599	0.000779719	0.00728811
RGD1559459	418.624	1.06168	0.316048	3.35924	0.000781575	0.00730132
Fam115c	37.4842	-1.10487	0.328961	-3.35866	0.000783219	0.00731255
Spry1	351.643	0.507633	0.151205	3.35725	0.000787215	0.00734571
Polr2f	361.09	0.487024	0.145107	3.3563	0.000789925	0.00736684
Nbr1	3763.86	0.355775	0.106015	3.3559	0.000791069	0.00737335
Wnt11	6.20699	-2.73904	0.816498	-3.35462	0.000794744	0.00739988
Fam189b	68.1859	-0.913574	0.272339	-3.35455	0.000794951	0.00739988
Rimkla	2.72996	-5.10314	1.52138	-3.35428	0.000795706	0.00739988
Nsrp1	384.426	0.61538	0.18346	3.35429	0.000795678	0.00739988
Tbx20	21.8724	1.33651	0.398498	3.35387	0.0007969	0.00740683
Fxyd5	233.106	-0.821558	0.245056	-3.35254	0.000800749	0.00743007
Ubxn2b	162.377	-0.720651	0.214938	-3.35283	0.000799901	0.00743007
Ehd3	1914.46	0.758888	0.226355	3.35265	0.000800415	0.00743007
Mpdz	479.062	0.475863	0.141948	3.35238	0.000801202	0.00743011
Sphkap	23.3023	1.61926	0.483052	3.35214	0.000801904	0.00743245
Acox3	2819.24	0.504534	0.150597	3.35022	0.000807483	0.00747996
Itch	489.825	0.666256	0.198893	3.34981	0.000808664	0.00748671
Nmd3	335.241	0.471737	0.140845	3.34932	0.000810097	0.00749577
Clec5a	5.50224	-4.13401	1.23535	-3.34642	0.000818612	0.00757033
Ccdc17	279.018	0.580201	0.173424	3.34556	0.000821157	0.00758962
Nwd2	21.7886	1.76927	0.52908	3.34406	0.000825625	0.00762665
Aup1	3147.47	0.41216	0.123329	3.34196	0.000831885	0.00768019
Tmed4	533.783	-0.409654	0.122618	-3.34091	0.000835053	0.00770514
Aif1l	20.8665	-1.56099	0.4676	-3.33831	0.000842882	0.00776513
Rasl12	31.1962	-1.43053	0.428521	-3.33829	0.000842964	0.00776513
Mtcl1	14.089	-1.62933	0.488066	-3.33835	0.000842784	0.00776513
Ddx27	487.701	0.384063	0.115055	3.33809	0.000843569	0.00776638
Lipc	6871.16	0.587373	0.176013	3.3371	0.000846578	0.00778975
Spata6	55.2375	-0.914962	0.274416	-3.33421	0.000855413	0.00786666
Gchfr	1356.05	-0.624954	0.187499	-3.3331	0.000858847	0.00789385
Atraid	569.613	-0.425362	0.127653	-3.33218	0.000861692	0.0079156
Ctnnbl1	463.851	0.326259	0.0979449	3.33105	0.000865199	0.0079434
Kif3b	288.909	-0.461206	0.138528	-3.32933	0.000870555	0.00798569
Eif2ak1	1219.79	0.294126	0.0883458	3.32926	0.000870771	0.00798569
Eps8l1	13.8085	-1.53111	0.459939	-3.32893	0.000871788	0.00799058
Smtn	572.996	0.665393	0.199958	3.32766	0.000875771	0.00802265
Hadhb	3999.4	0.417847	0.125583	3.32726	0.000877057	0.00802998
Tmc3	375.161	0.650983	0.195735	3.32584	0.000881524	0.00806641
Tagln	547.734	-1.34221	0.403595	-3.32564	0.000882156	0.00806772
Ccdc92	70.6077	-1.18869	0.357468	-3.3253	0.000883249	0.00807326
Wasf3	13.9643	1.61973	0.487326	3.3237	0.000888311	0.00811504
Capn3	2.9535	-5.28541	1.5903	-3.32354	0.000888832	0.00811532
Gatad1	425.979	0.474759	0.142854	3.32337	0.000889354	0.0081156
Ssr2	1534.86	-0.50193	0.151049	-3.32297	0.000890643	0.00812288
LOC108348072	8.45813	-2.2822	0.686876	-3.32257	0.000891914	0.00812999
Prag1	89.021	-1.04158	0.313521	-3.32221	0.000893074	0.00813608
Polr1e	148.205	0.595165	0.179165	3.32188	0.000894134	0.00813677
Sdf2l1	655.604	-0.659106	0.19841	-3.32194	0.000893945	0.00813677
Cisd3	580.271	-0.434614	0.130889	-3.32049	0.000898587	0.00817279
Pdap1	1826.51	0.383986	0.115652	3.3202	0.000899536	0.00817693
Rhobtb1	975.191	0.461748	0.139086	3.31987	0.000900609	0.00818218
Ppp1r14b	529.322	-0.487176	0.146773	-3.31924	0.000902613	0.00819588
Tspoap1	18.1624	-1.99444	0.600908	-3.31904	0.000903274	0.00819739
AC117869.1	218.098	-0.582124	0.1755	-3.31695	0.000910054	0.00825439
Aspg	4108.1	-0.705551	0.212745	-3.31642	0.000911795	0.00826557
Il1r2	11.1184	-2.0212	0.609479	-3.31627	0.000912287	0.00826557
Bola2	745.947	-0.557684	0.168195	-3.31569	0.000914167	0.00827807
AABR07017145.1	27.2219	-3.18035	0.959512	-3.31455	0.000917922	0.00830297
Slc37a1	94.4427	-0.847847	0.255788	-3.31464	0.000917609	0.00830297
Isca2	389.768	0.448646	0.135366	3.31431	0.00091871	0.00830556
AABR07044509.1	268.559	-1.01452	0.306163	-3.31367	0.000920806	0.00831996
Phlpp1	378.967	0.457085	0.137954	3.31331	0.000922001	0.00832621
Serpinb5	6.16627	-2.80308	0.846155	-3.31273	0.000923906	0.00833886
Pck2	195.67	-0.801128	0.241932	-3.31138	0.000928377	0.00837464
Arap3	349.808	0.432018	0.130506	3.31034	0.000931828	0.00840118
Commd1	747.629	0.330504	0.099859	3.30971	0.000933941	0.00841565
Klhl36	87.5145	-0.67232	0.203171	-3.30913	0.000935851	0.00842827
Hgf	682.209	0.629704	0.190307	3.30888	0.000936712	0.00843143
C1qa	3496.84	0.343509	0.103826	3.3085	0.000937975	0.0084382
Srpk1	518.05	0.387645	0.117208	3.30731	0.000941968	0.00846952
AABR07021220.1	88.3261	0.669887	0.20262	3.30613	0.000945941	0.00850061
Rnf44	784.885	0.375571	0.113658	3.30439	0.000951829	0.00854424
Cdkn1a	1424.91	1.24878	0.377909	3.30445	0.000951615	0.00854424
Crlf1	4.11173	-5.02149	1.51972	-3.30422	0.000952424	0.00854494
Tspan18	439.713	0.503543	0.152408	3.30392	0.000953414	0.00854919
Cisd1	1350.32	-0.469788	0.142215	-3.30336	0.000955329	0.00856171
Alb	2.74642e+06	0.452553	0.137018	3.30288	0.000956987	0.00857193
Dnajb12	1474.67	0.343378	0.103998	3.30179	0.000960713	0.00860065
Csnk1g3	227.574	0.478196	0.144855	3.3012	0.000962729	0.00861403
Gtpbp1	346.897	0.4367	0.132306	3.3007	0.00096445	0.00862476
Ifi44l	98.6343	-0.874714	0.265076	-3.29986	0.000967325	0.00864579
Lingo4	15.1335	2.40866	0.730348	3.29797	0.000973882	0.0086997
Ugt2b15	19216.9	-0.643677	0.195192	-3.29767	0.000974912	0.00870419
AC095693.1	5.1898	-3.15918	0.958426	-3.29622	0.000979945	0.00873969
Apoa1	72754.3	0.664095	0.201468	3.29628	0.000979757	0.00873969
Ephb1	15.8452	-3.24835	0.985535	-3.29602	0.000980639	0.00874117
Dhrs4	2248.3	0.528068	0.160305	3.29415	0.000987189	0.00879481
Cyb5r3	6193.56	0.514827	0.15635	3.29279	0.000991997	0.00882831
Golgb1	1323.95	0.356532	0.108277	3.29278	0.000992017	0.00882831
Chrnb1	39.626	-1.26221	0.383352	-3.29256	0.000992791	0.00883045
Rtcb	1069.22	-0.368523	0.111985	-3.29084	0.000998886	0.00887988
Opn3	43.9923	-1.42011	0.431617	-3.29021	0.00100112	0.00889495
Sgsm2	585.894	0.565331	0.171834	3.28999	0.00100191	0.00889718
Gng5	969.058	0.339852	0.103335	3.28885	0.00100599	0.00892385
Uox	16396.2	-0.423847	0.128872	-3.28888	0.00100586	0.00892385
Sytl1	16.4334	-1.72415	0.524297	-3.28849	0.00100726	0.00893031
Tmsb4x	5473.07	-0.416713	0.126726	-3.2883	0.00100793	0.0089315
Gzmm	19.9835	-1.62615	0.494682	-3.28726	0.00101168	0.00895989
Nedd8	1185.1	-0.357937	0.108914	-3.28641	0.00101473	0.00898207
Sc5d	6987.92	0.844841	0.257128	3.28568	0.00101735	0.00900049
Pawr	338.651	-0.682884	0.207851	-3.28544	0.00101822	0.00900336
Pdlim1	946.751	0.398591	0.121335	3.28504	0.00101966	0.00901131
Atp5f1c	4315.59	-0.326505	0.0994016	-3.28471	0.00102088	0.00901721
Glyr1	2781.02	0.259225	0.0789439	3.28366	0.00102467	0.00904588
Tinagl1	504.115	0.609754	0.185719	3.28321	0.00102633	0.00905085
Tsc2	738.491	0.366584	0.11165	3.28332	0.00102592	0.00905085
Rasef	3.56683	-4.69961	1.43227	-3.28123	0.00103356	0.00910973
Rpl5	9077.61	0.344279	0.104933	3.28095	0.00103458	0.00911386
Pcbd1	7318.47	0.341657	0.104141	3.28072	0.00103544	0.00911658
Atp6v1d	840.128	0.436709	0.133123	3.28049	0.00103629	0.00911922
Wbp2	1065.85	0.484906	0.147842	3.27988	0.0010385	0.00913385
Fermt1	6.74018	-2.89096	0.881609	-3.27919	0.00104107	0.00915156
Nrg1	74.5406	-1.47125	0.448724	-3.27874	0.00104272	0.00916118
Atxn1	91.9592	0.717867	0.218985	3.27815	0.0010449	0.00917552
Fastkd1	158.862	-0.617925	0.18852	-3.27777	0.00104631	0.00918295
Gbf1	1412.82	0.34234	0.104474	3.27679	0.00104996	0.00920727
Slc4a5	6.92379	2.88098	0.879226	3.27672	0.00105019	0.00920727
Arl5a	771.563	0.534308	0.163143	3.27509	0.00105628	0.00925578
Hpx	139397	-0.5227	0.159641	-3.27423	0.0010595	0.00927902
AABR07002564.1	6.7634	4.23528	1.29391	3.27323	0.00106326	0.00930707
Srcap	1584.56	0.386199	0.118005	3.27272	0.00106518	0.00931889
RGD1311595	443.512	0.711382	0.217449	3.27149	0.00106984	0.00933989
Wisp2	13.6552	-3.33248	1.01857	-3.27173	0.00106891	0.00933989
Zfyve1	445.747	-0.611019	0.186771	-3.27149	0.00106984	0.00933989
Sec22a	471.186	-0.397899	0.121618	-3.27171	0.00106899	0.00933989
Colec11	2087.06	0.466705	0.142695	3.27066	0.00107298	0.00935447
AABR07026534.3	2.72249	5.1969	1.58901	3.27053	0.00107347	0.00935447
Aktip	237.814	-0.534182	0.163336	-3.27045	0.00107377	0.00935447
AABR07035782.1	192.111	-1.68016	0.513699	-3.27072	0.00107275	0.00935447
Galnt3	8.25188	-2.65239	0.81116	-3.26987	0.00107596	0.00936865
Hars2	476.385	0.329932	0.100916	3.26937	0.00107787	0.00938033
Krt79	708.054	0.536257	0.164037	3.26911	0.00107885	0.00938394
Ctdsp1	4546.74	0.261175	0.0799043	3.26859	0.00108084	0.0093963
Chtop	947.22	-0.453204	0.138677	-3.26806	0.00108288	0.00940909
Ncor1	1724.76	0.295789	0.0905395	3.26696	0.0010871	0.00944077
AABR07027750.1	929.126	0.584755	0.179013	3.26655	0.00108866	0.00944937
Zdhhc5	850.151	0.346136	0.105979	3.26607	0.0010905	0.00946038
Txn1	2047.24	-0.429167	0.131411	-3.26584	0.0010914	0.00946316
LOC500684	13.376	1.69893	0.52038	3.26479	0.00109545	0.00949329
Tmem43	231.719	-0.529301	0.162144	-3.26439	0.00109701	0.00950191
Aff3	25.0913	1.17706	0.360778	3.26256	0.00110411	0.00955838
AABR07063704.1	6.56589	2.69199	0.825387	3.26149	0.0011083	0.0095896
Gorasp1	531.639	0.474688	0.145623	3.25971	0.00111526	0.00964481
Scaf1	1582.96	0.470456	0.144356	3.259	0.00111806	0.00966393
Dhodh	227.215	-0.529152	0.162392	-3.25849	0.00112007	0.00967623
Susd1	85.3192	0.64299	0.197352	3.25809	0.00112165	0.00968484
Ms4a6a	291.828	0.706545	0.216872	3.25789	0.00112244	0.00968664
Capzb	2027.44	0.312719	0.0960266	3.25659	0.00112758	0.00972589
RF00069	24.1414	1.31356	0.403405	3.25619	0.0011292	0.00972625
Npm1	2943.93	0.37278	0.114485	3.25614	0.00112939	0.00972625
Comt	12643.9	-0.490404	0.150599	-3.25636	0.00112852	0.00972625
Zkscan3	384.156	-0.391619	0.120303	-3.25527	0.00113286	0.00975109
Pdk4	924.459	1.3946	0.428461	3.25489	0.00113436	0.00975894
Rhd	23.7868	-1.51214	0.464668	-3.25425	0.00113693	0.00976577
Ltbp2	331.51	-0.741019	0.227705	-3.2543	0.00113673	0.00976577
Dnajc1	748.256	0.372968	0.114599	3.25454	0.00113575	0.00976577
Cenpb	886.186	-0.337363	0.103686	-3.25371	0.0011391	0.00977937
Cbx6	131.012	-0.787818	0.242151	-3.25342	0.00114024	0.00978407
Chrd	627.746	-0.455475	0.140017	-3.25299	0.00114197	0.00979384
Eif5a2	14.4076	-1.73094	0.532349	-3.25152	0.00114791	0.00983858
Wdr78	44.4126	-1.03976	0.319789	-3.2514	0.00114838	0.00983858
Ifitm2	632.985	-0.667537	0.205398	-3.24997	0.00115419	0.00988079
Eif2a	681.092	0.342748	0.105473	3.24962	0.00115557	0.00988079
Rps4y2	219.702	-1.01885	0.313508	-3.24983	0.00115473	0.00988079
Itpa	828.691	-0.478072	0.147119	-3.24956	0.00115582	0.00988079
Cldn1	1955.87	0.591613	0.182066	3.24945	0.00115629	0.00988079
Nufip1	232.156	0.471486	0.145109	3.24919	0.00115736	0.00988476
Lect2	5768.47	0.570165	0.175505	3.24871	0.00115931	0.00989636
Mogat3	158.624	1.82514	0.561845	3.24849	0.00116021	0.00989892
Kcnj8	350.457	-0.624728	0.192382	-3.24734	0.00116491	0.00993384
Slu7	466.091	0.373307	0.115027	3.24537	0.00117297	0.00999748
Ip6k2	921.37	0.834193	0.257089	3.24476	0.00117549	0.0100138
Ergic3	2368.6	0.3423	0.1055	3.24455	0.00117638	0.0100162
Foxp2	41.3121	0.874453	0.269536	3.24428	0.00117747	0.0100203
LOC100911186	55.7547	-0.998678	0.307852	-3.24402	0.00117856	0.0100244
Mybph	76.0772	-1.11786	0.344628	-3.24367	0.00117999	0.0100314
Fign	57.8807	1.09235	0.336882	3.24254	0.0011847	0.0100663
Mbl2	463.307	0.92426	0.285134	3.2415	0.00118904	0.0100969
Nrap	9.09385	-2.28434	0.704742	-3.24138	0.00118952	0.0100969
Acadm	6960.7	0.40658	0.125454	3.24086	0.0011917	0.0101102
AABR07028009.1	70.3187	-1.59668	0.492704	-3.24064	0.0011926	0.0101127
Tango2	261.084	-0.647522	0.199888	-3.23943	0.0011977	0.0101507
Galnt11	1234.17	0.604651	0.186751	3.23775	0.00120477	0.0102054
Pex3	445.776	0.427972	0.132218	3.23686	0.00120854	0.0102233
Ppan	594.505	0.636339	0.196586	3.23695	0.00120814	0.0102233
Stard3nl	206.322	-0.580828	0.179445	-3.23681	0.00120875	0.0102233
Sds	2833.15	-2.30335	0.711677	-3.23651	0.00120999	0.0102287
Mat2b	463.86	-0.458642	0.141803	-3.23435	0.00121919	0.0103012
Leng8	2348.54	0.468809	0.144965	3.23395	0.0012209	0.0103103
Prap1	3.60951	-5.26243	1.62826	-3.23193	0.00122956	0.0103728
Anxa7	352.551	-0.629516	0.194777	-3.23199	0.00122933	0.0103728
AC135826.1	77.6221	-1.12665	0.348635	-3.23161	0.00123095	0.0103793
Sirt3	950.98	-0.407538	0.126118	-3.23141	0.00123181	0.0103797
Alox15	1841.27	-1.54983	0.47963	-3.23131	0.00123226	0.0103797
Hk3	144.513	-1.23315	0.381775	-3.23004	0.00123771	0.0104203
Prdm16	27.6231	-1.72377	0.533697	-3.22987	0.00123846	0.0104214
Hmgn5b	102.618	0.938679	0.290704	3.22898	0.00124231	0.0104484
Tdrd7	502.469	-0.366733	0.113631	-3.2274	0.00124919	0.0104849
Myo1g	101.305	-0.705525	0.218588	-3.22765	0.00124812	0.0104849
Prkdc	423.478	0.433741	0.134381	3.2277	0.00124788	0.0104849
Rfx6	28.1778	-2.02554	0.627604	-3.22742	0.00124913	0.0104849
Cfdp1	848.159	0.363023	0.112508	3.22664	0.00125251	0.0105075
Dynlrb1	1450.95	0.471278	0.146149	3.22464	0.00126131	0.010576
LOC100911847	2458	-0.434213	0.134676	-3.22413	0.00126357	0.0105895
Fopnl	136.924	-0.658339	0.204272	-3.22286	0.00126918	0.0106311
Tmem169	7.81741	-2.64685	0.821421	-3.22228	0.00127175	0.0106473
Akap17a	903.359	0.460998	0.143165	3.22006	0.00128164	0.0107246
Kcne3	11.3247	-1.97631	0.613956	-3.21898	0.00128649	0.0107558
Zbtb42	129.099	-0.726431	0.225674	-3.21894	0.00128666	0.0107558
Mslnl	7.60885	-1.91336	0.59475	-3.21709	0.00129498	0.0108198
Gramd1b	63.69	-1.02004	0.317106	-3.2167	0.00129675	0.0108237
AABR07043844.1	11.9612	2.08383	0.647809	3.21674	0.00129656	0.0108237
Tsr1	1112.06	0.30572	0.0950511	3.21638	0.0012982	0.0108303
Slc25a29	108.118	-0.924108	0.287329	-3.2162	0.00129901	0.0108317
Casp9	189.403	-0.435259	0.135383	-3.21502	0.00130437	0.0108653
Prkd3	1475.28	0.376387	0.117069	3.21509	0.00130403	0.0108653
Ubqln1	3071.61	0.327247	0.101793	3.21484	0.00130519	0.0108668
Gclc	2783.31	0.668148	0.207931	3.21332	0.00131211	0.0109188
Fut2	9.62023	-2.45884	0.765527	-3.21196	0.00131833	0.0109651
Fnbp1	228.621	0.548375	0.17081	3.21043	0.00132536	0.011018
Pom121	495.485	0.451193	0.140675	3.20733	0.00133973	0.0111319
Psenen	1415.71	0.307664	0.0959326	3.20708	0.00134088	0.0111358
Serpinc1	49468.7	0.335931	0.104828	3.20461	0.00135248	0.0112265
Sacm1l	875.487	-0.470383	0.146869	-3.20274	0.00136126	0.0112938
Npdc1	340.436	-0.455627	0.142278	-3.20237	0.00136301	0.0112969
Mybpc3	4.60512	-3.54443	1.10681	-3.20238	0.00136299	0.0112969
Adap1	28.2973	-1.22911	0.38385	-3.20206	0.00136447	0.0113033
Epsti1	105.263	0.675107	0.210877	3.20143	0.00136747	0.0113169
Glg1	1457.49	-0.217262	0.0678634	-3.20146	0.00136732	0.0113169
Pdgfd	61.5271	-1.1822	0.369394	-3.20037	0.00137251	0.0113529
[truncated: 2,035 more rows]

## Sheet: 30d
symbol	baseMean	log2FoldChange	lfcSE	stat	pvalue	padj
LOC103690108	516.237	-2.43929	0.151349	-16.117	1.93805e-58	3.20457e-54
Slc25a30	241.901	-3.32035	0.258359	-12.8517	8.41621e-38	6.9581e-34
LOC100360791	3679.89	-2.0622	0.164172	-12.5612	3.45002e-36	1.42615e-32
MGC108823	94.3532	-4.75443	0.378062	-12.5758	2.86888e-36	1.42615e-32
Serpina4	17142.8	1.33435	0.106792	12.4948	7.96575e-36	2.63427e-32
Adamts15	219.788	-4.0839	0.327299	-12.4776	9.89349e-36	2.72648e-32
Fam111a	1397.35	-5.15417	0.421738	-12.2213	2.39344e-34	5.65364e-31
Clec2l	76.6224	-4.16561	0.341368	-12.2027	3.00675e-34	6.21457e-31
LOC100362027	2222.14	-1.90163	0.157999	-12.0357	2.30653e-33	3.94475e-30
Unc5cl	342.056	-3.21663	0.267319	-12.0329	2.38569e-33	3.94475e-30
RT1-A2	1253.51	2.06621	0.172762	11.9599	5.76489e-33	8.66568e-30
Rpl30	794.57	1.95344	0.168235	11.6114	3.60779e-31	4.97123e-28
Pcdha6	95.1943	3.94543	0.342282	11.5268	9.66411e-31	1.2292e-27
Tspan8	210.801	-4.74206	0.418122	-11.3413	8.18826e-30	9.67092e-27
St3gal4	862.383	-1.14759	0.101273	-11.3316	9.15491e-30	1.00918e-26
Lamc2	384.443	-2.76249	0.246893	-11.189	4.61391e-29	4.76819e-26
RT1-CE1	106.785	2.65114	0.240678	11.0153	3.2245e-28	3.1363e-25
Psmg3	323.683	-1.77422	0.16239	-10.9257	8.68592e-28	7.97898e-25
Sdr42e1	770.511	1.44872	0.132851	10.9049	1.0923e-27	9.5059e-25
Lgals2	220.159	-2.66433	0.249299	-10.6873	1.16764e-26	9.65344e-24
H3f3c	407.234	-2.59479	0.245327	-10.5768	3.81589e-26	3.00456e-23
Lama5	561.407	-2.42198	0.2307	-10.4984	8.78707e-26	6.60428e-23
Kif12	238.001	-2.55694	0.243946	-10.4816	1.04952e-25	7.54516e-23
AABR07044383.1	106.491	-2.73251	0.263505	-10.3698	3.40064e-25	2.3429e-22
AC130970.1	301.512	-3.60166	0.347608	-10.3613	3.72016e-25	2.46052e-22
Loxl1	331.125	-2.58267	0.254846	-10.1342	3.8941e-24	2.4765e-21
Ubxn4	2116.9	1.06198	0.105795	10.0381	1.03676e-23	6.34918e-21
Krt7	251.943	-5.08798	0.508576	-10.0044	1.45832e-23	8.61193e-21
P2rx5	81.6495	-5.57874	0.560659	-9.95033	2.51359e-23	1.43318e-20
Scrn1	101.917	-3.85633	0.389709	-9.89539	4.35923e-23	2.40266e-20
Creb3l2	487.982	1.62832	0.165813	9.82025	9.21166e-23	4.91338e-20
Ccdc77	268.851	-1.57459	0.1609	-9.78613	1.29151e-22	6.67345e-20
Spint1	83.3518	-3.14303	0.322355	-9.7502	1.84101e-22	9.22458e-20
Mettl7b	1217.46	2.24948	0.230846	9.7445	1.94736e-22	9.46608e-20
Krt10	485.327	-1.94019	0.199224	-9.73874	2.06096e-22	9.46608e-20
AABR07044362.1	126.621	-7.2976	0.74933	-9.73883	2.05902e-22	9.46608e-20
Mfge8	4007	-1.09017	0.112429	-9.69653	3.11935e-22	1.39401e-19
Igsf9	121.71	-3.78119	0.390256	-9.68901	3.35782e-22	1.46109e-19
Anxa2	988.277	-1.79526	0.18763	-9.56808	1.08905e-21	4.61728e-19
RGD1560242	80.9487	8.16014	0.861858	9.46808	2.85026e-21	1.17823e-18
Foxo1	274.33	1.47015	0.15552	9.45315	3.28786e-21	1.32597e-18
Lyc2	212.812	-3.61663	0.384506	-9.40591	5.15808e-21	2.03069e-18
Cmc1	286.875	-1.85684	0.197897	-9.38288	6.41978e-21	2.46863e-18
C5ar2	93.7775	-2.32497	0.248373	-9.36081	7.913e-21	2.84438e-18
Ms4a18	57.1691	-5.57967	0.59604	-9.36122	7.88187e-21	2.84438e-18
C4a	408.368	-1.8126	0.193568	-9.36415	7.66634e-21	2.84438e-18
Anxa13	194.15	-2.53961	0.271982	-9.33741	9.87228e-21	3.47315e-18
AABR07044414.1	65.0103	-2.56598	0.276162	-9.29158	1.52013e-20	5.23653e-18
Reep6	7774.88	1.54647	0.168303	9.18859	3.98021e-20	1.34312e-17
Adgrg1	190.632	-2.6567	0.289944	-9.16279	5.05707e-20	1.67237e-17
LOC100360095	253.335	9.60946	1.04955	9.15578	5.39654e-20	1.74964e-17
Celsr1	84.998	-3.46973	0.384038	-9.03486	1.64211e-19	5.2216e-17
Car9	77.6815	-3.50646	0.388765	-9.01948	1.88985e-19	5.89598e-17
RGD1563354	134.176	-3.00799	0.33542	-8.96786	3.02337e-19	9.25766e-17
Mcpt1l1	43.7885	-6.19389	0.693004	-8.93774	3.97194e-19	1.19411e-16
Sts	984.936	1.4952	0.167598	8.92138	4.60511e-19	1.35974e-16
Uxt	690.025	1.47541	0.166016	8.88715	6.26957e-19	1.81872e-16
Akr1b8	73.3713	-2.94783	0.333659	-8.83487	1.00218e-18	2.85707e-16
Reg3b	175.49	-12.1112	1.3921	-8.6999	3.32165e-18	9.30908e-16
Plau	342.666	-2.14692	0.24748	-8.67513	4.13091e-18	1.11975e-15
Baiap2l1	793.898	1.18427	0.136496	8.67623	4.09097e-18	1.11975e-15
Ppif	1041.35	-0.84714	0.0979614	-8.6477	5.25486e-18	1.40144e-15
Hps1	300.612	-1.92308	0.222585	-8.63973	5.63481e-18	1.45581e-15
Lig4	200.367	1.39162	0.161061	8.64034	5.60483e-18	1.45581e-15
Ccdc146	149.364	2.42024	0.28143	8.59978	7.98667e-18	2.03169e-15
Itgae	144.625	-1.85355	0.215822	-8.58834	8.82319e-18	2.21048e-15
Cryab	218.477	-1.99584	0.233542	-8.54599	1.27439e-17	3.14508e-15
Clstn1	347.48	-1.61026	0.18889	-8.52486	1.52999e-17	3.72034e-15
St14	177.931	-2.02043	0.237353	-8.51234	1.70453e-17	4.08471e-15
LOC691352	61.6139	-10.6678	1.26043	-8.46358	2.59292e-17	6.12485e-15
Samd4a	256.341	1.35105	0.159726	8.45856	2.70697e-17	6.30419e-15
Adora1	296.585	-2.15692	0.255141	-8.45382	2.81912e-17	6.4742e-15
AABR07045400.1	24.8454	4.23334	0.501516	8.4411	3.14375e-17	7.12081e-15
AABR07035348.1	3603.11	1.68006	0.199898	8.40461	4.29285e-17	9.5922e-15
AC114233.2	311.574	-1.83068	0.217861	-8.40298	4.35287e-17	9.59663e-15
Gsta5	9456.73	1.73335	0.208772	8.30258	1.01872e-16	2.21638e-14
Cldn4	64.2426	-3.69062	0.445155	-8.29065	1.12632e-16	2.41866e-14
Kdelr3	167.427	-1.52583	0.184151	-8.28572	1.17397e-16	2.48866e-14
Pamr1	406.451	-1.96776	0.23764	-8.28043	1.22735e-16	2.56889e-14
Golga4	1505.94	0.700517	0.0848888	8.25218	1.55536e-16	3.21473e-14
Msln	578.743	-3.59516	0.437696	-8.21384	2.14227e-16	4.37314e-14
Lypd8	80.2783	-9.31848	1.13601	-8.20282	2.34815e-16	4.73495e-14
Tfg	1070.54	1.05427	0.128753	8.18829	2.64975e-16	5.27874e-14
Hsd3b3	22.5799	3.81778	0.467424	8.1677	3.14324e-16	6.18731e-14
Il6r	3339.56	1.32906	0.163141	8.14669	3.74012e-16	7.27563e-14
Bphl	789.65	1.26558	0.155551	8.13611	4.08184e-16	7.84804e-14
Acad10	2102.56	1.28483	0.158213	8.12087	4.62849e-16	8.7968e-14
Cldn6	73.5305	-2.833	0.349459	-8.10682	5.19606e-16	9.76327e-14
Plat	275.093	-2.47942	0.305946	-8.10408	5.31441e-16	9.87345e-14
Cdh17	154.094	-4.72655	0.585658	-8.07049	7.00149e-16	1.28633e-13
Fndc3b	465.76	1.40044	0.174023	8.04742	8.45611e-16	1.5365e-13
Scrn3	493.474	1.17433	0.146309	8.02637	1.00402e-15	1.80451e-13
Cyp2c12	31890.5	-2.7229	0.340251	-8.00264	1.21783e-15	2.16525e-13
Itga3	162.766	-2.16554	0.270787	-7.99721	1.27274e-15	2.23881e-13
Fblim1	187.483	-2.18851	0.273705	-7.99589	1.28641e-15	2.23903e-13
Cdh3	136.425	-2.6541	0.332497	-7.98234	1.43582e-15	2.47304e-13
Krt19	218.682	-2.62954	0.329778	-7.97366	1.5404e-15	2.62582e-13
AABR07002065.1	128.523	1.49741	0.187905	7.96896	1.60012e-15	2.69979e-13
Rhbdd2	199.265	1.68155	0.211932	7.93436	2.11584e-15	3.53387e-13
Nars	1802.11	0.850273	0.107207	7.93111	2.17202e-15	3.59143e-13
Arhgap42	437.299	1.15866	0.146824	7.89148	2.98633e-15	4.88901e-13
Minos1	755.579	-0.957704	0.12147	-7.88428	3.16349e-15	5.11617e-13
Map2	118.96	-2.77684	0.352241	-7.88336	3.18697e-15	5.11617e-13
Acox2	10407.8	0.948018	0.120842	7.84513	4.3252e-15	6.87665e-13
Pla2g16	1641.53	-1.25288	0.160391	-7.8114	5.65548e-15	8.90604e-13
B4galnt1	2403.99	1.25664	0.161201	7.79546	6.41743e-15	1.00106e-12
Ceacam1	4784.4	0.880007	0.113024	7.78601	6.91602e-15	1.06875e-12
Cbx3	370.469	-1.3177	0.169535	-7.7724	7.70112e-15	1.17906e-12
Anxa3	1246.81	-0.908773	0.117139	-7.75809	8.62197e-15	1.30793e-12
Chka	2024.54	-1.19032	0.153814	-7.73874	1.00404e-14	1.50926e-12
Crip1	300.854	-1.46907	0.190622	-7.7067	1.29111e-14	1.92329e-12
Fgl2	381.18	-1.23434	0.160412	-7.69481	1.41706e-14	2.09206e-12
Pdlim1	946.751	0.911352	0.119064	7.65433	1.94319e-14	2.84342e-12
Npm3	150.828	-1.33872	0.175117	-7.64472	2.09397e-14	3.01076e-12
Plaa	924.349	0.99424	0.130048	7.64516	2.08691e-14	3.01076e-12
Hipk2	316.08	1.35418	0.17796	7.60946	2.75238e-14	3.92332e-12
Rhod	604.566	-1.0683	0.140728	-7.59124	3.16859e-14	4.478e-12
Emc2	554.312	0.927876	0.122612	7.56758	3.80236e-14	5.32814e-12
AABR07005821.1	680.821	-4.19607	0.554799	-7.56323	3.93189e-14	5.46334e-12
AABR07005844.1	539.783	-4.00662	0.530591	-7.55123	4.31158e-14	5.8919e-12
RT1-Bb	745.639	-2.265	0.299929	-7.5518	4.29275e-14	5.8919e-12
Taok3	403.371	1.23101	0.163046	7.5501	4.34937e-14	5.89482e-12
RT1-CE10	703.917	1.98002	0.26366	7.50977	5.92311e-14	7.9625e-12
Mrc2	89.5051	-2.03025	0.271788	-7.47	8.01959e-14	1.06939e-11
Wnk1	1969.64	0.66389	0.0890991	7.45114	9.25363e-14	1.20609e-11
Duoxa1	152.383	-1.94782	0.261417	-7.451	9.26357e-14	1.20609e-11
Sncg	102.327	-3.47803	0.466686	-7.45261	9.15134e-14	1.20609e-11
Kifc3	585.536	-1.33498	0.179288	-7.44601	9.62058e-14	1.24278e-11
Zfp354a	584.75	2.05646	0.276341	7.44176	9.93561e-14	1.27353e-11
Aoc1	72.3148	-4.07639	0.547939	-7.43949	1.01074e-13	1.28558e-11
Lamb3	144.714	-2.33975	0.315839	-7.40804	1.28178e-13	1.61789e-11
RT1-N2	277.871	9.61058	1.29828	7.40257	1.3357e-13	1.67317e-11
Arl8b	1324.04	0.808599	0.109425	7.38955	1.47329e-13	1.8045e-11
Mia2	3573.07	0.724001	0.0979624	7.3906	1.46163e-13	1.8045e-11
Dhrs7l1	639.969	3.1545	0.426871	7.38982	1.4703e-13	1.8045e-11
Megf9	374.36	1.53431	0.207798	7.38365	1.5401e-13	1.87247e-11
Hykk	137.786	2.02397	0.274742	7.36681	1.74765e-13	2.09814e-11
AABR07035374.1	10394.9	1.57382	0.213644	7.36654	1.7511e-13	2.09814e-11
Nudt12	410.679	1.01669	0.138137	7.36	1.83917e-13	2.18782e-11
Ddr1	175.35	-1.75461	0.238764	-7.34876	2.0006e-13	2.36285e-11
P2rx7	311.007	1.79085	0.243746	7.3472	2.02409e-13	2.37364e-11
Jak3	383.029	-1.2422	0.169232	-7.34026	2.13174e-13	2.48227e-11
Agxt2	3454.54	1.23297	0.168591	7.31339	2.60477e-13	3.01187e-11
Ubap2	676.212	0.983647	0.134651	7.30516	2.7693e-13	3.17936e-11
Sox9	59.0374	-2.97236	0.406935	-7.30426	2.78807e-13	3.17936e-11
Cdhr5	36.6537	-3.85345	0.527749	-7.30167	2.84217e-13	3.21885e-11
Cd44	262.439	-2.14035	0.293352	-7.29616	2.96091e-13	3.33052e-11
Matn4	28.717	-4.52243	0.620721	-7.28577	3.1983e-13	3.53708e-11
Pdcd6ip	3903.93	0.525326	0.0721014	7.28594	3.19441e-13	3.53708e-11
Jade2	147.028	1.41318	0.193975	7.28534	3.20872e-13	3.53708e-11
Wnt7b	40.0378	-5.65359	0.776165	-7.284	3.24059e-13	3.54856e-11
Aif1	718.234	-1.10913	0.152572	-7.26951	3.60793e-13	3.92481e-11
Zcchc2	444.273	0.817284	0.11249	7.26541	3.71912e-13	4.01932e-11
Glis2	268.027	-2.05972	0.283622	-7.26221	3.80817e-13	4.08884e-11
Hsd17b6	889.309	3.05945	0.421557	7.25751	3.94277e-13	4.1762e-11
R3hdm2	2607.22	0.717529	0.098865	7.25767	3.93827e-13	4.1762e-11
Psmd11	1769.4	0.583225	0.0803702	7.25674	3.9653e-13	4.1762e-11
S1pr2	220.861	-1.57403	0.217172	-7.24787	4.23381e-13	4.43076e-11
Huwe1	1648.49	0.693232	0.0957154	7.24264	4.40027e-13	4.5474e-11
Col1a1	3875.72	-1.92246	0.265417	-7.24315	4.38391e-13	4.5474e-11
Akr1b1	294.042	-0.999458	0.138103	-7.23707	4.58486e-13	4.70874e-11
S100b	61.1186	-3.75249	0.519651	-7.22118	5.15369e-13	5.26026e-11
Arpc1b	1430.82	-0.630037	0.0877214	-7.18224	6.85783e-13	6.9567e-11
Mst1r	31.0933	-3.22059	0.448479	-7.18113	6.91392e-13	6.97084e-11
Tsc22d1	3427.39	1.1988	0.167031	7.1771	7.12076e-13	7.13586e-11
Paqr6	59.3483	-2.55733	0.356531	-7.17282	7.34669e-13	7.31792e-11
Lrig3	333.834	1.12165	0.156461	7.16887	7.56187e-13	7.48716e-11
Tifa	121.195	-2.03685	0.284271	-7.16515	7.77008e-13	7.64752e-11
Pitrm1	928.009	0.772924	0.107915	7.16237	7.92966e-13	7.7584e-11
Phldb1	291.6	-1.34761	0.188217	-7.15984	8.0774e-13	7.85646e-11
Fut4	118.316	-1.42665	0.199541	-7.14963	8.70095e-13	8.41346e-11
Zfp142	714.834	0.914291	0.1282	7.13177	9.90855e-13	9.52546e-11
Cep85l	102.384	1.77652	0.249148	7.13041	1.00073e-12	9.56478e-11
Plet1	62.6054	-4.56541	0.640741	-7.1252	1.03929e-12	9.8762e-11
Slc25a24	174.098	-1.713	0.241314	-7.09862	1.26007e-12	1.19059e-10
AY172581.10	47.2591	7.58773	1.06925	7.09632	1.28121e-12	1.20368e-10
Apoa2	9618.27	1.73105	0.243995	7.09462	1.2971e-12	1.21173e-10
Birc2	727.224	-1.00162	0.141274	-7.08995	1.34165e-12	1.2463e-10
Tp53i3	525.396	0.983726	0.138785	7.08811	1.35956e-12	1.25588e-10
Mtmr11	161.834	-1.69873	0.239969	-7.07893	1.45267e-12	1.33444e-10
Ankrd11	1938.29	0.65891	0.0931198	7.07594	1.4844e-12	1.35606e-10
RGD1561161	188.651	-1.8687	0.264169	-7.07386	1.50686e-12	1.36679e-10
Larp4b	334.449	1.05909	0.149731	7.07332	1.51268e-12	1.36679e-10
Atxn2	1189.73	1.22117	0.17269	7.07143	1.53344e-12	1.37801e-10
Edem1	3256.05	1.29055	0.182614	7.06712	1.58187e-12	1.41153e-10
Elk1	433.402	1.255	0.177596	7.0666	1.58781e-12	1.41153e-10
Mmp2	835.257	-1.2361	0.175169	-7.05662	1.70596e-12	1.50845e-10
Ptk7	64.9029	-2.75513	0.390604	-7.0535	1.74467e-12	1.52979e-10
Efna5	85.9983	1.68549	0.238969	7.05319	1.74859e-12	1.52979e-10
Chpf	263.814	-1.42428	0.202113	-7.04692	1.82927e-12	1.59195e-10
Sema3c	195.514	-2.51074	0.356417	-7.04437	1.86299e-12	1.61158e-10
Dzip1l	77.1573	-2.07477	0.294555	-7.04375	1.87132e-12	1.61158e-10
Gabrp	86.7994	-5.58632	0.794619	-7.03019	2.06255e-12	1.76706e-10
Wnt7a	37.7595	-3.4234	0.487588	-7.0211	2.20132e-12	1.87623e-10
Cdv3	498.577	0.832569	0.118664	7.01621	2.27962e-12	1.933e-10
Nsfl1c	1589.57	0.799271	0.114041	7.00866	2.40619e-12	2.02992e-10
LOC100911486	88.4019	-2.34637	0.335681	-6.98987	2.75139e-12	2.30935e-10
Cgnl1	3248.57	0.616619	0.0882264	6.98906	2.7674e-12	2.31106e-10
Ell2	923.654	0.931663	0.133518	6.97779	2.99866e-12	2.4916e-10
A1cf	1132.6	1.36342	0.195438	6.97621	3.03243e-12	2.50706e-10
Uqcr10	1593.06	-1.10521	0.158488	-6.97345	3.09252e-12	2.54402e-10
Ptk2b	604.197	-1.20529	0.172969	-6.96825	3.20914e-12	2.62689e-10
Golt1b	215.004	-0.933913	0.134177	-6.96029	3.39563e-12	2.76585e-10
Nucb1	5662.18	0.716773	0.103082	6.95342	3.56531e-12	2.88982e-10
Npc2	3197.88	-0.759847	0.109637	-6.93059	4.19095e-12	3.38036e-10
Ubr4	2450.69	0.680584	0.0983136	6.92258	4.43477e-12	3.55966e-10
Gpat3	248.671	2.43897	0.353168	6.906	4.98527e-12	3.98219e-10
Lgals4	23.9161	-4.63992	0.672865	-6.89576	5.35765e-12	4.25907e-10
Chd9	455.046	1.08359	0.157245	6.89108	5.53687e-12	4.38049e-10
Dock5	276.116	1.22182	0.177387	6.88791	5.6618e-12	4.4384e-10
Abhd3	101.761	5.28229	0.766899	6.88786	5.66376e-12	4.4384e-10
LOC100911107	57.0162	-8.65458	1.25772	-6.88114	5.93762e-12	4.63106e-10
Dstn	1036.44	0.947987	0.137844	6.87726	6.10129e-12	4.71629e-10
Cx3cl1	102.55	-2.07373	0.301537	-6.8772	6.10393e-12	4.71629e-10
Tpsab1	14.6201	-5.01541	0.729444	-6.87566	6.17019e-12	4.7453e-10
Sun2	711.743	0.784496	0.114119	6.87438	6.22616e-12	4.74566e-10
Krt80	26.0751	-4.57273	0.665189	-6.87433	6.22805e-12	4.74566e-10
Echdc3	2521.39	0.912028	0.133141	6.85008	7.38063e-12	5.5981e-10
S100a16	790.688	-1.01161	0.14771	-6.84861	7.45735e-12	5.63047e-10
Tfap4	103.875	1.71559	0.250591	6.84618	7.58464e-12	5.70054e-10
Tff3	231.669	-2.92	0.427724	-6.82684	8.68043e-12	6.49461e-10
Gpt2	1725.27	1.0336	0.15147	6.82382	8.86516e-12	6.60294e-10
Syvn1	1585.6	0.792589	0.116357	6.81167	9.64741e-12	7.15336e-10
Eif3j	671.158	0.812303	0.119481	6.79862	1.05629e-11	7.7972e-10
Cd63	1777.84	-1.63417	0.240762	-6.78747	1.14115e-11	8.38615e-10
Tm4sf1	76.5166	-2.06145	0.303851	-6.78443	1.16542e-11	8.52662e-10
Wbp2	1065.85	0.98914	0.145996	6.77514	1.24289e-11	9.0534e-10
LOC690045	56.7375	-2.71946	0.40248	-6.75676	1.41108e-11	1.02334e-09
Slc25a4	2606.65	-1.82219	0.269777	-6.75443	1.43393e-11	1.03537e-09
Guca2b	35.4578	-8.55181	1.26902	-6.73889	1.59598e-11	1.14737e-09
AABR07072511.1	137.411	5.79941	0.862964	6.72034	1.81302e-11	1.29776e-09
Raph1	471.775	1.12679	0.167721	6.71823	1.8394e-11	1.31097e-09
Col7a1	35.8542	-2.65684	0.395812	-6.71238	1.91479e-11	1.35884e-09
B2m	29353.6	0.889639	0.132555	6.71149	1.92648e-11	1.36129e-09
Myo5c	73.4547	-2.56325	0.382411	-6.70286	2.04374e-11	1.43801e-09
Ltbp2	331.51	-1.54056	0.230046	-6.69676	2.13096e-11	1.48715e-09
Cbln3	109.025	3.20077	0.477961	6.69672	2.13156e-11	1.48715e-09
Cox5a	2241.69	-0.726219	0.108516	-6.69226	2.19748e-11	1.52669e-09
AABR07039356.2	590.914	17.7295	2.65519	6.6773	2.43382e-11	1.68381e-09
Sec24d	1074.8	1.00471	0.150505	6.67562	2.46188e-11	1.69204e-09
Grpel1	1686.28	-0.806363	0.120797	-6.67537	2.46617e-11	1.69204e-09
Vps13d	1245.68	0.629976	0.0943938	6.67391	2.4907e-11	1.69849e-09
Prom1	218.176	-2.5466	0.381594	-6.6736	2.49611e-11	1.69849e-09
Elf3	83.1358	-2.70251	0.405387	-6.6665	2.61979e-11	1.77534e-09
Rnf8	504.358	0.970835	0.145657	6.6652	2.64301e-11	1.78376e-09
AABR07006310.1	1127.19	1.19086	0.178833	6.65905	2.756e-11	1.85246e-09
Klf5	39.248	-4.07887	0.613265	-6.65108	2.90948e-11	1.9477e-09
AABR07047789.1	330.879	1.09086	0.164189	6.64391	3.05461e-11	2.03661e-09
Iqcc	99.9263	1.39855	0.211004	6.62808	3.40078e-11	2.25831e-09
Cd320	388.494	-1.19442	0.18028	-6.62535	3.46433e-11	2.28218e-09
Irs1	296.029	1.32522	0.200004	6.62593	3.45073e-11	2.28218e-09
Wasl	1341.66	0.699908	0.105848	6.61239	3.78167e-11	2.48134e-09
Ergic1	662.264	0.855324	0.129414	6.60923	3.86327e-11	2.52487e-09
Pacsin2	1021.81	0.679664	0.10297	6.60059	4.0952e-11	2.66591e-09
Degs2	31.5035	-3.47723	0.526999	-6.59818	4.16224e-11	2.69893e-09
Psmb10	717.608	-0.934081	0.141743	-6.58998	4.39889e-11	2.84124e-09
P3h3	350.008	-0.967649	0.147026	-6.58147	4.65806e-11	2.99692e-09
LOC100911847	2458	-0.889993	0.135268	-6.57948	4.72112e-11	3.02572e-09
Atp5mg	3175.85	-0.718377	0.109234	-6.57649	4.81686e-11	3.07517e-09
Zc3h18	944.009	0.772097	0.117528	6.56945	5.05031e-11	3.2118e-09
Habp2	5963.56	0.729819	0.111132	6.56712	5.12972e-11	3.24981e-09
Eif3a	3460.54	0.715487	0.108976	6.56556	5.18388e-11	3.27158e-09
AC094053.1	1200.67	1.11272	0.169974	6.54639	5.89457e-11	3.70596e-09
Wnt4	157.417	-1.20981	0.185428	-6.52441	6.82696e-11	4.2759e-09
Lpin1	2050.35	2.394	0.367071	6.5219	6.94208e-11	4.31531e-09
Cdcp1	37.5083	-3.56831	0.547095	-6.5223	6.92373e-11	4.31531e-09
S100a11	466.367	-1.71147	0.262657	-6.51597	7.22222e-11	4.47263e-09
Cxcl16	334.728	-1.41409	0.217113	-6.51317	7.35827e-11	4.53989e-09
Ncor1	1724.76	0.579751	0.0890222	6.51243	7.39433e-11	4.54518e-09
Rad23b	3868.8	0.713313	0.109614	6.50748	7.64232e-11	4.66731e-09
Tm4sf20	25.4871	-8.47551	1.30245	-6.50734	7.64947e-11	4.66731e-09
Ptgs1	843.801	-0.750265	0.115785	-6.4798	9.18437e-11	5.56826e-09
Ccdc92	70.6077	2.24707	0.346788	6.47965	9.19344e-11	5.56826e-09
Ndrg1	252.236	-1.47789	0.228108	-6.4789	9.23907e-11	5.57548e-09
LOC100362999	220.777	1.20688	0.186331	6.47708	9.35166e-11	5.6229e-09
Ddx27	487.701	0.74676	0.115506	6.46514	1.01206e-10	6.06258e-09
Nbl1	132.907	-2.27801	0.352382	-6.46461	1.01562e-10	6.06258e-09
Tnfrsf12a	166.786	-1.58685	0.245936	-6.45227	1.10188e-10	6.55383e-09
Slc15a1	33.3784	-4.29065	0.66512	-6.45094	1.11159e-10	6.58784e-09
AABR07044080.2	263.926	-0.97358	0.150992	-6.44789	1.13415e-10	6.69755e-09
Tmem119	87.0716	-2.03865	0.31651	-6.44102	1.18676e-10	6.98329e-09
LOC498222	56.626	-2.61667	0.406841	-6.43168	1.26205e-10	7.39999e-09
Serinc2	43.848	-2.84915	0.443871	-6.41886	1.37297e-10	8.02193e-09
Adamtsl2	517.912	-1.37473	0.214194	-6.41814	1.37952e-10	8.03182e-09
RGD1565367	71.1927	-2.53251	0.395075	-6.41021	1.45323e-10	8.4052e-09
Rdx	1062.93	1.21749	0.189932	6.41014	1.45382e-10	8.4052e-09
R3hdm1	453.237	0.639987	0.0999794	6.40119	1.54172e-10	8.88234e-09
S100a6	279.015	-2.34826	0.367119	-6.39647	1.59007e-10	9.12909e-09
Aldh1a2	151.969	-2.53811	0.396865	-6.39539	1.60141e-10	9.1624e-09
AABR07048487.2	11.0114	9.08354	1.42107	6.39205	1.63676e-10	9.30029e-09
AABR07033745.1	21.8559	4.93272	0.771682	6.39217	1.63547e-10	9.30029e-09
Sgpp2	60.405	-2.86538	0.449087	-6.38047	1.76551e-10	9.99749e-09
Mt-atp8	79598	1.60307	0.251352	6.37781	1.79641e-10	1.01378e-08
Bsdc1	1586.26	0.614587	0.0964272	6.37359	1.84653e-10	1.03852e-08
Lad1	49.962	-2.77182	0.435296	-6.36766	1.91938e-10	1.07583e-08
Zfhx3	177.609	1.38897	0.218152	6.36698	1.92782e-10	1.07691e-08
Rnh1	975.883	-0.635521	0.100116	-6.34782	2.1839e-10	1.21585e-08
Ripor2	172.137	1.5424	0.243007	6.34714	2.19348e-10	1.21709e-08
AABR07057108.1	11.446	7.96302	1.25577	6.34115	2.28052e-10	1.26115e-08
Fkbp10	174.263	-1.46214	0.231112	-6.32656	2.5068e-10	1.38166e-08
Aldh5a1	1645.6	0.698472	0.110428	6.32514	2.53011e-10	1.38988e-08
Clic3	50.6839	-2.36009	0.373812	-6.31358	2.72646e-10	1.49278e-08
Eif1	2776.48	-0.850994	0.134882	-6.30915	2.80575e-10	1.53113e-08
Dmgdh	6871.08	0.906589	0.14384	6.30277	2.92372e-10	1.58504e-08
Fam198b	220.041	-1.28092	0.20322	-6.30312	2.91716e-10	1.58504e-08
Hsd3b5	353.04	6.06062	0.962004	6.3	2.97649e-10	1.60837e-08
Hspa8	2801.99	0.869331	0.138007	6.29916	2.99258e-10	1.6118e-08
Cma1	22.9871	-4.47208	0.711403	-6.28628	3.25168e-10	1.74567e-08
Supt6h	1472.28	0.559691	0.0891316	6.27938	3.39929e-10	1.819e-08
Akap5	88.1352	2.0175	0.32152	6.27488	3.49909e-10	1.86637e-08
Mt-co2	363757	1.21298	0.193669	6.26314	3.77299e-10	2.00599e-08
Aldh8a1	11818.4	0.681655	0.108973	6.25528	3.96798e-10	2.1029e-08
Bicc1	611.033	-1.36318	0.218142	-6.24904	4.12986e-10	2.1817e-08
Cox19	547.819	-0.855383	0.136977	-6.24473	4.24531e-10	2.23555e-08
AABR07029613.1	90.4682	-1.47558	0.236371	-6.24266	4.30203e-10	2.25108e-08
RGD1563861	90.7443	-1.54279	0.247131	-6.24278	4.29862e-10	2.25108e-08
Slc16a2	3218.04	0.710985	0.113922	6.24101	4.34753e-10	2.26771e-08
Sfn	42.8735	-3.75068	0.601294	-6.23768	4.44111e-10	2.30924e-08
Pigl	112.601	-1.21135	0.194328	-6.2335	4.56126e-10	2.36428e-08
Pdk2	2327.8	0.782873	0.125693	6.22844	4.71106e-10	2.43429e-08
Inpp1	172.969	-1.10147	0.177094	-6.21969	4.98143e-10	2.55801e-08
Col13a1	276.594	1.31763	0.211838	6.22	4.97161e-10	2.55801e-08
Pabpc1	6984	0.602749	0.0970278	6.21212	5.2274e-10	2.67601e-08
Creg1	2658.78	1.02831	0.16561	6.20925	5.32388e-10	2.71699e-08
Borcs8	340.011	-0.945655	0.152483	-6.20172	5.58481e-10	2.84138e-08
AA926063	46.284	-2.35272	0.379851	-6.19379	5.87342e-10	2.97905e-08
Gstm1	19906.8	1.18338	0.19114	6.19116	5.97213e-10	3.01985e-08
Clip2	147.833	-0.969682	0.156741	-6.18652	6.15054e-10	3.10059e-08
Il1b	132.171	-1.73523	0.280535	-6.18542	6.19379e-10	3.1129e-08
AABR07004572.1	14.3329	3.29335	0.532749	6.1818	6.3375e-10	3.17547e-08
Mbnl2	1141.53	0.82438	0.133472	6.17641	6.55745e-10	3.27575e-08
Itpr3	95.2524	-2.13009	0.345509	-6.16509	7.04442e-10	3.50842e-08
Arhgap32	300.333	0.990732	0.160751	6.16314	7.13159e-10	3.54117e-08
Tmcc2	151.275	1.63744	0.265984	6.15617	7.45273e-10	3.68955e-08
Tf	799615	-0.532903	0.0865814	-6.15493	7.51085e-10	3.70722e-08
Rpf1	345.47	0.68819	0.111912	6.14936	7.77943e-10	3.82836e-08
Nr1d1	481.478	3.58324	0.5832	6.14411	8.04144e-10	3.94555e-08
Nucb2	1451.7	0.985293	0.160463	6.14032	8.23551e-10	4.02882e-08
Cyp1b1	57.1178	-3.16576	0.516042	-6.13469	8.53248e-10	4.16179e-08
Trappc12	560.222	0.58673	0.0957231	6.12945	8.81818e-10	4.28336e-08
Ep400	1026.06	0.497016	0.0810902	6.12918	8.83353e-10	4.28336e-08
Tmsb4x	5473.07	-0.776301	0.126752	-6.12457	9.09282e-10	4.39619e-08
AABR07044404.1	186.074	1.75883	0.287217	6.1237	9.14281e-10	4.40747e-08
Psme3	618.817	0.69058	0.112848	6.11955	9.38414e-10	4.50405e-08
Ctla2a	214.656	-1.12806	0.184343	-6.11932	9.39761e-10	4.50405e-08
Rsu1	387.552	1.00695	0.164658	6.1154	9.63178e-10	4.60293e-08
Tmem131	917.557	0.877704	0.14362	6.11131	9.88145e-10	4.70864e-08
B4galnt4	40.2614	-3.03648	0.496957	-6.11015	9.95398e-10	4.72957e-08
Akt2	1626.54	0.645364	0.105665	6.10766	1.01101e-09	4.78999e-08
Adamts16	26.8337	-3.83685	0.628337	-6.10636	1.01929e-09	4.81543e-08
Slit1	14.5556	-7.70676	1.26379	-6.09815	1.07303e-09	5.05485e-08
Evc	149.698	-1.62512	0.266701	-6.09342	1.1052e-09	5.19163e-08
Plscr2	134.711	-1.27032	0.208561	-6.0909	1.12279e-09	5.2593e-08
Itm2a	200.749	-2.44237	0.401047	-6.08997	1.1293e-09	5.27486e-08
Zdhhc5	850.151	0.632555	0.103927	6.08656	1.15365e-09	5.37341e-08
Smc1a	1449.89	0.694502	0.114225	6.08013	1.20085e-09	5.57754e-08
Pipox	1820.72	1.2625	0.207711	6.07814	1.21584e-09	5.63137e-08
Uchl1	60.5779	2.52903	0.416299	6.07503	1.23963e-09	5.72549e-08
Prss8	135.175	-2.0482	0.337975	-6.06019	1.35961e-09	6.26216e-08
Cacnb3	121.963	-1.48446	0.245368	-6.0499	1.44934e-09	6.65691e-08
Smim7	651.223	-0.78252	0.129573	-6.0392	1.54885e-09	7.09423e-08
Mapk13	37.1766	-3.16007	0.523316	-6.03855	1.55506e-09	7.10301e-08
Car2	482.734	1.05069	0.174108	6.03472	1.5924e-09	7.25353e-08
Cpxm2	29.5607	-2.94284	0.487754	-6.03344	1.60503e-09	7.29098e-08
Clmn	573.919	1.09288	0.1813	6.02805	1.65954e-09	7.51795e-08
Gngt2	211.963	-1.2492	0.20728	-6.02664	1.67407e-09	7.56306e-08
Rhoq	190.617	-1.11836	0.185593	-6.0259	1.68174e-09	7.57699e-08
Cdx2	16.4799	-7.80062	1.29488	-6.02421	1.6994e-09	7.63574e-08
Lrfn3	19.0741	4.02814	0.669111	6.02014	1.74271e-09	7.80912e-08
RT1-CE4	760.128	0.780649	0.12972	6.01795	1.76643e-09	7.89403e-08
Rusc2	569.988	0.97979	0.162824	6.01748	1.77149e-09	7.89533e-08
Slu7	466.091	0.689506	0.114596	6.01686	1.77829e-09	7.9043e-08
Fras1	41.6589	-3.87791	0.644934	-6.01289	1.82249e-09	8.07903e-08
Ube4b	887.615	0.578866	0.0963553	6.00762	1.88271e-09	8.32369e-08
Muc13	7.87831	-7.83888	1.30517	-6.00603	1.90116e-09	8.38285e-08
Nudc	281.769	0.99516	0.165714	6.00529	1.90985e-09	8.39878e-08
Bach1	126.17	1.34683	0.22436	6.00297	1.93739e-09	8.4973e-08
Ms4a8	13.9509	-8.38643	1.39755	-6.0008	1.96344e-09	8.58687e-08
Mup4	8.43136	8.68477	1.44736	6.00041	1.9682e-09	8.58687e-08
Ccdc152	7578.39	-1.34903	0.224888	-5.99867	1.98942e-09	8.65661e-08
Krt20	199.075	-3.20907	0.537368	-5.97184	2.3459e-09	1.0181e-07
Cyc1	3211.59	-0.61435	0.102922	-5.96909	2.38583e-09	1.03271e-07
Snx3	2784.42	0.57313	0.0961144	5.96299	2.47656e-09	1.06919e-07
Tnnt2	55.7425	-3.08133	0.516942	-5.96068	2.51197e-09	1.08165e-07
Rbm33	369.921	1.21591	0.204128	5.95657	2.5758e-09	1.10626e-07
Slc25a3	3486.39	-0.609383	0.102327	-5.95525	2.59673e-09	1.11236e-07
Rnf5	1347.34	0.852612	0.143562	5.93898	2.86801e-09	1.22539e-07
Itga8	178.646	-1.60609	0.270463	-5.93829	2.88018e-09	1.22736e-07
Mpv17l2	237.463	-0.941406	0.158543	-5.93787	2.88746e-09	1.22736e-07
Pfas	538.759	-0.760219	0.128074	-5.93578	2.92452e-09	1.23992e-07
Angel1	326.402	0.72085	0.121502	5.93284	2.97746e-09	1.25914e-07
Gatad1	425.979	0.836982	0.141185	5.92826	3.06164e-09	1.28488e-07
RGD1566099	58.6474	-1.57806	0.266179	-5.92854	3.05631e-09	1.28488e-07
Plcd3	53.4021	-2.03282	0.342898	-5.92835	3.05992e-09	1.28488e-07
Abhd17b	249.707	-1.06317	0.179412	-5.92589	3.10613e-09	1.30025e-07
St13	1955.61	0.759398	0.128219	5.92269	3.1672e-09	1.32246e-07
Cd9	372.865	-1.75706	0.296763	-5.92077	3.20446e-09	1.33465e-07
Ap3d1	1958.78	0.468565	0.0792103	5.91546	3.30941e-09	1.37145e-07
Rbp1	6500.07	0.946893	0.160065	5.91567	3.30535e-09	1.37145e-07
Cavin1	675.301	-1.12786	0.190735	-5.91321	3.35506e-09	1.3869e-07
G3bp2	571.082	0.667203	0.112843	5.91265	3.36648e-09	1.38815e-07
Cdh6	29.719	-4.89505	0.828947	-5.90514	3.52345e-09	1.44926e-07
Ppic	180.444	-1.5044	0.254899	-5.90194	3.59246e-09	1.47398e-07
Il17re	45.9708	-2.63356	0.446326	-5.90053	3.6233e-09	1.48295e-07
AABR07058831.1	132.487	-1.29839	0.220081	-5.89961	3.64362e-09	1.48759e-07
Rab5c	2156.45	0.593218	0.100679	5.89218	3.81144e-09	1.55227e-07
Nsmf	786.389	-1.0154	0.172464	-5.88759	3.91862e-09	1.592e-07
Foxo3	203.047	1.30533	0.221845	5.88398	4.0051e-09	1.62314e-07
Pik3cd	283.125	-1.00609	0.171296	-5.87342	4.26897e-09	1.72585e-07
Bag3	419.267	0.877745	0.149526	5.87019	4.35284e-09	1.75547e-07
RT1-CE3	39.2481	2.44157	0.416237	5.86582	4.4693e-09	1.79805e-07
AC121740.1	34.2104	7.2452	1.23577	5.8629	4.5486e-09	1.82551e-07
Polr1b	242.709	0.96462	0.164697	5.85692	4.71518e-09	1.88778e-07
Ipo4	1131.48	0.632904	0.108076	5.85608	4.73932e-09	1.89287e-07
Spock2	41.3708	-2.92361	0.499391	-5.85434	4.78898e-09	1.90809e-07
Rpl22l1	442.488	-1.6154	0.275989	-5.85313	4.82413e-09	1.91748e-07
Gls	216.663	-1.32778	0.227049	-5.84796	4.97634e-09	1.97323e-07
Galm	2069.91	0.632988	0.108374	5.84075	5.19656e-09	2.05219e-07
Mtr	208.414	0.952142	0.16302	5.84063	5.20028e-09	2.05219e-07
Egr1	836.902	2.26085	0.387271	5.83791	5.28606e-09	2.08107e-07
AABR07015507.1	393.422	-0.958951	0.164293	-5.83684	5.32017e-09	2.08953e-07
AABR07059807.1	22.3531	7.63169	1.30806	5.83434	5.40051e-09	2.11605e-07
Cox7c	2070.46	-0.81842	0.140319	-5.83256	5.45825e-09	2.13362e-07
AABR07039448.1	85.6446	-1.50857	0.258999	-5.82464	5.72373e-09	2.23212e-07
Fam214a	963.2	0.785513	0.134964	5.82015	5.87932e-09	2.2874e-07
Nampt	1136.29	-0.884784	0.15204	-5.81941	5.90541e-09	2.29216e-07
Pcnx1	1373.47	0.513715	0.0882988	5.81791	5.95874e-09	2.30744e-07
Col8a2	91.1279	-1.7346	0.298227	-5.81639	6.01308e-09	2.32304e-07
AABR07068694.1	131.783	2.2948	0.394893	5.8112	6.20267e-09	2.3907e-07
Atp11c	503.769	1.31164	0.225926	5.80559	6.4138e-09	2.46633e-07
Gstp1	470.683	-1.08138	0.186458	-5.7996	6.64732e-09	2.5502e-07
Anxa1	295.541	-1.57261	0.271417	-5.79408	6.8696e-09	2.62937e-07
Guca2a	13.1988	-5.05761	0.873054	-5.79301	6.91351e-09	2.64007e-07
Rhbdd1	312.82	0.786136	0.135758	5.79072	7.00866e-09	2.67023e-07
Sirt3	950.98	-0.73427	0.126845	-5.78871	7.09273e-09	2.69605e-07
Eif1a	704.954	0.812808	0.140473	5.78622	7.1988e-09	2.7301e-07
Fbln2	302.925	-1.87491	0.324602	-5.77602	7.64868e-09	2.89273e-07
Card14	61.559	-2.13303	0.369311	-5.77572	7.66262e-09	2.89273e-07
Emp2	235.598	-1.006	0.174293	-5.77192	7.83731e-09	2.95193e-07
Galnt12	30.3403	-3.18944	0.552619	-5.7715	7.85711e-09	2.95267e-07
Foxp1	164.586	1.18951	0.206171	5.76953	7.94939e-09	2.98057e-07
C4bpb	12011.3	-0.898323	0.155773	-5.76686	8.07617e-09	3.02126e-07
Rtel1	733.028	0.913095	0.158411	5.76411	8.20913e-09	3.06406e-07
H2afz	708.336	-1.11548	0.19379	-5.75614	8.60615e-09	3.20502e-07
Pkd2	226.195	-1.56189	0.271378	-5.75542	8.64275e-09	3.21141e-07
Arhgef16	29.968	-2.78468	0.483906	-5.75459	8.68516e-09	3.21994e-07
Trim16	21.2493	-3.43622	0.597282	-5.7531	8.76212e-09	3.2412e-07
Fam120a	1224.13	0.814173	0.141544	5.7521	8.8141e-09	3.25315e-07
Phtf1	447.034	0.672856	0.117046	5.74865	8.99614e-09	3.31294e-07
Prpf8	3126.12	0.519882	0.090486	5.74544	9.16806e-09	3.36875e-07
Fam89a	362.028	-1.0541	0.183563	-5.74242	9.33322e-09	3.42184e-07
Rab5b	2636.36	0.442874	0.0771507	5.74038	9.44624e-09	3.45561e-07
Elmsan1	416.982	0.830053	0.144611	5.73991	9.47273e-09	3.45765e-07
Efs	40.704	-2.22301	0.387558	-5.73594	9.69748e-09	3.53189e-07
Rab32	398.638	-0.871117	0.151898	-5.73489	9.75736e-09	3.54589e-07
Muc1	106.527	-2.19987	0.383804	-5.73174	9.94053e-09	3.58437e-07
Slc50a1	460.902	0.905688	0.157991	5.73252	9.89473e-09	3.58437e-07
C4b	265.722	-1.74474	0.304395	-5.73183	9.93499e-09	3.58437e-07
RGD1310495	199.487	0.86341	0.150641	5.73158	9.94995e-09	3.58437e-07
Gsta2	2674.91	1.19641	0.208794	5.73011	1.00368e-08	3.59997e-07
Glt8d1	222.151	-0.88191	0.153904	-5.73027	1.00272e-08	3.59997e-07
Gbf1	1412.82	0.590665	0.103171	5.7251	1.03374e-08	3.69975e-07
Vil1	21.3664	-3.9893	0.697279	-5.72123	1.05754e-08	3.77675e-07
Ywhae	5569.05	0.435559	0.0761746	5.7179	1.0785e-08	3.83907e-07
Dcdc2	113.05	-2.2866	0.399914	-5.71772	1.07963e-08	3.83907e-07
Syde2	105.005	1.32841	0.232475	5.71421	1.10218e-08	3.91084e-07
Tcf7l1	889.253	0.874527	0.1532	5.70839	1.1405e-08	4.03815e-07
Lsm5	75.1029	-1.43714	0.251791	-5.70766	1.1454e-08	4.04685e-07
Bcl2l11	240.178	1.47961	0.259266	5.70692	1.15042e-08	4.0559e-07
Ist1	480.059	-0.644195	0.11295	-5.70336	1.17468e-08	4.13262e-07
H2afv	362.656	-0.725451	0.127232	-5.70181	1.18544e-08	4.15279e-07
Nlk	244.593	0.684939	0.120126	5.70182	1.18533e-08	4.15279e-07
Gaa	1403.72	0.60288	0.105745	5.70126	1.18925e-08	4.15733e-07
Ncoa2	388.802	0.842368	0.147785	5.69997	1.19828e-08	4.18006e-07
Smarcc1	720.59	0.58574	0.102791	5.69834	1.20978e-08	4.21129e-07
Rps16	6066.74	-0.597871	0.10493	-5.69779	1.21368e-08	4.216e-07
Htra3	98.3845	-2.10843	0.370164	-5.69593	1.22703e-08	4.25344e-07
Havcr1	20.8256	-2.82419	0.49641	-5.68924	1.27608e-08	4.41422e-07
Fzd6	163.476	-1.1917	0.20948	-5.68882	1.2792e-08	4.41579e-07
Bok	95.4478	-1.97433	0.347283	-5.68508	1.30751e-08	4.5041e-07
Gars	1580.43	0.964084	0.169665	5.68229	1.32901e-08	4.56864e-07
Wee1	115.995	-1.82843	0.321814	-5.68162	1.33422e-08	4.57705e-07
Nploc4	867.788	0.554112	0.0975626	5.67955	1.3505e-08	4.6233e-07
Fabp12	76.2384	-1.93717	0.341424	-5.67378	1.39684e-08	4.76222e-07
Sec16a	2661.59	0.441413	0.0777972	5.6739	1.39583e-08	4.76222e-07
Numb	448.851	0.778492	0.137218	5.67339	1.39999e-08	4.76314e-07
Ptgds	38.1991	-3.31777	0.585306	-5.66843	1.44108e-08	4.89286e-07
Slc7a2	1358.48	1.42627	0.252003	5.65971	1.51627e-08	5.1376e-07
C1s	9264.82	-0.779339	0.137754	-5.65747	1.53622e-08	5.19454e-07
Gpc3	268.543	-2.49542	0.441209	-5.65587	1.55059e-08	5.23244e-07
Abcc5	948.435	-0.849316	0.150179	-5.65535	1.5553e-08	5.23766e-07
Ctgf	927.044	-2.81606	0.498112	-5.65346	1.57247e-08	5.28471e-07
Rfx6	28.1778	-7.32973	1.29682	-5.65206	1.58534e-08	5.31715e-07
Clic5	91.1604	-1.69937	0.300696	-5.65147	1.59084e-08	5.32481e-07
Psmb8	431.308	-1.18722	0.210231	-5.64722	1.63061e-08	5.44691e-07
Tedc1	104.523	-1.31579	0.233027	-5.6465	1.63743e-08	5.45866e-07
Sertad1	166.405	-1.23622	0.219008	-5.64463	1.65537e-08	5.50734e-07
Atg13	659.518	0.740017	0.131155	5.64233	1.67769e-08	5.57039e-07
Pld4	591.293	-0.72291	0.128144	-5.64137	1.68699e-08	5.59006e-07
Ap1ar	267.586	0.761609	0.13521	5.63277	1.77339e-08	5.86286e-07
Tax1bp3	513.168	-0.733329	0.130197	-5.63248	1.77641e-08	5.86286e-07
Ano1	145.568	-1.53	0.271774	-5.62966	1.80566e-08	5.94751e-07
Fhl2	135.735	-1.50813	0.268022	-5.62689	1.83485e-08	6.03164e-07
Galnt10	302.591	-0.764854	0.136063	-5.62134	1.89484e-08	6.21649e-07
RGD1305178	296.76	0.747286	0.132969	5.62	1.90957e-08	6.25242e-07
Nrip3	62.5567	-1.6766	0.298525	-5.61629	1.95099e-08	6.37286e-07
Nhlrc2	498.473	0.706537	0.125807	5.61602	1.95406e-08	6.37286e-07
Psmc2	1726.4	0.655866	0.116879	5.61148	2.00606e-08	6.51674e-07
Asxl2	161.176	1.00585	0.179239	5.61178	2.00257e-08	6.51674e-07
Utp4	337.493	0.656731	0.117078	5.60935	2.03089e-08	6.58447e-07
Ap2a2	1800.44	0.38539	0.0687349	5.6069	2.05985e-08	6.66528e-07
Mrps35	584.714	0.720722	0.128595	5.60457	2.08773e-08	6.74229e-07
Jcad	761.262	1.01018	0.180322	5.60209	2.1178e-08	6.8261e-07
Epcam	533.146	-1.40447	0.250833	-5.59923	2.15309e-08	6.92633e-07
Mal	40.9997	-2.13068	0.380569	-5.59866	2.16013e-08	6.93549e-07
Srgap2	430.036	0.672927	0.120258	5.5957	2.19736e-08	7.04134e-07
Usf2	1513.02	0.542394	0.0969746	5.59316	2.2298e-08	7.13147e-07
Psen1	395.702	0.694126	0.124128	5.59201	2.24458e-08	7.16488e-07
Sept11	484.851	0.784054	0.140235	5.591	2.25772e-08	7.19294e-07
Xylb	6390.82	0.672659	0.120339	5.58969	2.27472e-08	7.23316e-07
Ascc3	534.449	0.763665	0.136654	5.5883	2.29306e-08	7.2775e-07
Tomm40l	194.64	1.22709	0.21962	5.58732	2.30599e-08	7.30451e-07
Stam2	143.774	1.08913	0.194959	5.58645	2.31753e-08	7.32702e-07
Ube2r2	2363.1	0.592277	0.106027	5.58611	2.32219e-08	7.32774e-07
Sik3	1572.38	0.458448	0.0821124	5.58317	2.36168e-08	7.42401e-07
Top3b	440.273	0.742648	0.133013	5.58329	2.36011e-08	7.42401e-07
Tab2	1326.34	0.688837	0.12345	5.5799	2.40653e-08	7.55065e-07
Celsr2	53.2581	-1.48412	0.266291	-5.5733	2.49956e-08	7.7955e-07
Ldhb	293.997	-1.54405	0.277056	-5.57305	2.5032e-08	7.7955e-07
Cd24	173.39	-1.63377	0.293156	-5.57303	2.50342e-08	7.7955e-07
Rtn4ip1	501.874	-1.62583	0.291723	-5.57321	2.50092e-08	7.7955e-07
Gucy2c	96.9701	-3.46093	0.621372	-5.56982	2.55004e-08	7.92575e-07
C1qtnf1	665.147	-0.990305	0.177906	-5.56646	2.59965e-08	8.06478e-07
Tm7sf3	792.341	-0.880953	0.158345	-5.5635	2.64413e-08	8.1874e-07
Ncs1	17.8233	-3.13703	0.563991	-5.5622	2.66388e-08	8.22857e-07
Tspan15	91.9292	-1.23048	0.22123	-5.56198	2.66738e-08	8.22857e-07
Ahnak	755.352	-1.55661	0.279901	-5.56128	2.67804e-08	8.24605e-07
Ptms	16593.5	0.823199	0.148064	5.55975	2.70161e-08	8.30318e-07
Alpk1	136.048	-1.68504	0.303174	-5.55798	2.72908e-08	8.35653e-07
Pus7	143.003	1.01661	0.182908	5.55805	2.72812e-08	8.35653e-07
Azgp1	23263.4	0.673064	0.121279	5.54973	2.86109e-08	8.74457e-07
Zbed5	490.351	-1.38905	0.250319	-5.54912	2.87107e-08	8.75888e-07
Marc2	4850.39	-0.413771	0.0745827	-5.54781	2.8927e-08	8.80862e-07
AABR07035343.1	198.941	1.69819	0.306158	5.54677	2.90987e-08	8.84461e-07
AABR07025295.1	303.816	0.841607	0.15184	5.54272	2.97805e-08	9.03523e-07
Mt-nd2	294823	1.07166	0.193386	5.54155	2.9981e-08	9.07942e-07
RGD1560854	118.264	1.14404	0.206517	5.53968	3.0302e-08	9.15983e-07
RGD1311745	173.84	0.879039	0.158786	5.536	3.0945e-08	9.33714e-07
Lgals9	2250.35	0.605982	0.10954	5.53206	3.16491e-08	9.53221e-07
Lmbr1l	129.229	-1.19894	0.216772	-5.53089	3.18616e-08	9.57875e-07
Pnrc2	1029.5	-0.790894	0.143104	-5.52671	3.2629e-08	9.79165e-07
AABR07070307.1	36.7136	-2.18505	0.3958	-5.52059	3.37855e-08	1.01046e-06
Irf2	513.009	0.755157	0.13679	5.52055	3.37939e-08	1.01046e-06
Fndc1	136.932	-2.1766	0.394539	-5.51682	3.45185e-08	1.0284e-06
Gng10	834.466	-0.724234	0.131275	-5.51692	3.44987e-08	1.0284e-06
Dclre1a	569.765	0.881756	0.15988	5.51511	3.48572e-08	1.03662e-06
Tpr	1133.8	0.584266	0.106044	5.50966	3.59531e-08	1.0673e-06
Serpinh1	1731.64	-0.760745	0.138157	-5.50638	3.66286e-08	1.0854e-06
Setd1b	431.554	0.950312	0.17262	5.50524	3.68674e-08	1.09052e-06
Cd200	63.7762	-1.89229	0.34399	-5.50099	3.77668e-08	1.11513e-06
Ets2	906.67	-0.770042	0.140158	-5.49411	3.92686e-08	1.15741e-06
Papss2	3607.39	0.79287	0.144336	5.49321	3.94688e-08	1.16124e-06
Bms1	507.554	0.529582	0.0964125	5.49287	3.95447e-08	1.16141e-06
Dpys	6041.07	0.915233	0.16667	5.49128	3.99038e-08	1.16987e-06
AABR07005618.1	78.5821	1.20264	0.219365	5.48239	4.19615e-08	1.22749e-06
Acaa1a	5467.27	-0.738498	0.134709	-5.48216	4.20176e-08	1.22749e-06
Ndufb5	1343.3	-0.603965	0.11026	-5.47766	4.30997e-08	1.25688e-06
Slc16a12	1855.09	0.64912	0.118661	5.47037	4.49097e-08	1.30736e-06
Cdc42ep2	156.471	-0.900507	0.164665	-5.46871	4.53316e-08	1.31732e-06
Tbc1d14	691.305	-0.806256	0.147512	-5.46568	4.61144e-08	1.33772e-06
Cited2	614.358	1.53058	0.280424	5.45809	4.81293e-08	1.39373e-06
Igsf11	589.251	1.09126	0.20021	5.45057	5.02089e-08	1.45141e-06
Cst3	2652.78	0.696558	0.127803	5.45024	5.03017e-08	1.45155e-06
Mt-nd5	119081	1.18399	0.21742	5.44562	5.16258e-08	1.48716e-06
Flrt3	99.3815	-2.29557	0.421742	-5.44307	5.23709e-08	1.50399e-06
Fndc3a	575.729	0.883179	0.16226	5.443	5.23918e-08	1.50399e-06
Tshz1	310.337	0.873055	0.160552	5.43785	5.39284e-08	1.54542e-06
Cyp1a1	325.85	-4.27552	0.786709	-5.43469	5.48918e-08	1.57031e-06
Ubd	2241.05	-7.40697	1.36348	-5.43239	5.56035e-08	1.58792e-06
Zrsr1	104.385	1.18936	0.219071	5.4291	5.66393e-08	1.61471e-06
Ubr1	210.645	0.850328	0.156899	5.4196	5.97325e-08	1.69996e-06
AABR07021988.1	2337.98	0.640344	0.11816	5.41928	5.9838e-08	1.70004e-06
Manf	2716.58	0.794271	0.146655	5.4159	6.09821e-08	1.72223e-06
Sorbs3	825.154	0.703646	0.129926	5.41574	6.10358e-08	1.72223e-06
Sh3bp5	1075	1.19777	0.221158	5.41591	6.09762e-08	1.72223e-06
Clip1	717.213	0.603872	0.111489	5.41644	6.07973e-08	1.72223e-06
Cdk12	429.884	0.686858	0.126835	5.41537	6.11621e-08	1.72285e-06
Taf15	108.38	-1.72442	0.318731	-5.41028	6.29273e-08	1.76956e-06
Gde1	626.883	-0.843486	0.155916	-5.40988	6.30653e-08	1.77043e-06
Tpcn2	801.26	-1.28597	0.238019	-5.40281	6.56058e-08	1.83863e-06
Zkscan3	384.156	-0.637194	0.117959	-5.40184	6.59609e-08	1.84545e-06
Masp2	6711.82	0.645158	0.119466	5.40034	6.65141e-08	1.85699e-06
Mybph	76.0772	-2.03695	0.377204	-5.40012	6.6598e-08	1.85699e-06
Ubl7	640.32	0.674806	0.124978	5.39938	6.68718e-08	1.86149e-06
Serbp1	2695.12	0.554884	0.102821	5.39658	6.79221e-08	1.88755e-06
Palm2	44.1791	1.56589	0.290453	5.39119	6.99912e-08	1.94179e-06
AABR07054368.1	993.025	-1.01913	0.189095	-5.38953	7.06425e-08	1.95657e-06
Oca2	56.8683	2.19157	0.407284	5.38095	7.40931e-08	2.04871e-06
Rpl9	3168.01	-0.630011	0.117112	-5.37957	7.4665e-08	2.05764e-06
Hus1	516.806	0.62749	0.116642	5.37963	7.46372e-08	2.05764e-06
Kitlg	110.333	-1.58735	0.29527	-5.37591	7.6195e-08	2.09631e-06
Igsf3	65.055	-2.43799	0.453591	-5.37487	7.66378e-08	2.10499e-06
Fam213b	293.31	-1.37196	0.255312	-5.37365	7.71574e-08	2.11575e-06
Phgdh	202.353	2.82728	0.526598	5.36896	7.91935e-08	2.16799e-06
Psmb4	1944.09	-0.747686	0.139345	-5.36572	8.0625e-08	2.19985e-06
Irak1	2441.96	0.568965	0.106043	5.36543	8.07566e-08	2.19985e-06
Fgfr3	851.98	-1.36746	0.254861	-5.36553	8.07119e-08	2.19985e-06
Selenoh	406.937	-0.78347	0.146131	-5.36143	8.25679e-08	2.24549e-06
AABR07044364.1	29.2695	-2.07372	0.386866	-5.3603	8.30845e-08	2.25583e-06
Ino80e	357.617	0.613735	0.114573	5.35673	8.47426e-08	2.29708e-06
Diaph1	1940.28	0.361796	0.0675514	5.35587	8.51461e-08	2.30424e-06
Fgfr1op	181.633	-0.723057	0.135087	-5.35253	8.67339e-08	2.33703e-06
Zmpste24	533.549	0.54447	0.10172	5.35263	8.66848e-08	2.33703e-06
AC095947.3	1141.31	1.2626	0.235894	5.35243	8.67819e-08	2.33703e-06
Nox4	18.9564	2.991	0.559233	5.3484	8.87358e-08	2.38577e-06
Mir675	38073.2	-2.68597	0.502527	-5.34493	9.04531e-08	2.42799e-06
Tril	117.871	-1.61659	0.302482	-5.34443	9.07012e-08	2.4307e-06
Lrrfip2	580.697	0.660556	0.123705	5.33978	9.30577e-08	2.48982e-06
Atp5mc3	4186.72	-0.646297	0.121079	-5.33779	9.40843e-08	2.51322e-06
B3galt5	20.3695	-4.23908	0.794394	-5.33624	9.48917e-08	2.5307e-06
Fam129a	99.3578	-1.8184	0.341027	-5.33211	9.70767e-08	2.5848e-06
AABR07054370.1	409.905	0.878778	0.164869	5.33015	9.81296e-08	2.60864e-06
Gja1	632.487	-1.19625	0.224466	-5.32933	9.85775e-08	2.61634e-06
Jag1	99.2463	-1.71086	0.32106	-5.3288	9.88648e-08	2.61976e-06
Dtx4	160.691	-0.796558	0.149539	-5.32675	9.99866e-08	2.64525e-06
Zfp652	205.499	0.938903	0.176276	5.32632	1.00224e-07	2.64729e-06
Tead4	128.864	-1.19883	0.225218	-5.32296	1.02094e-07	2.69238e-06
Pdgfd	61.5271	-2.06986	0.38907	-5.32001	1.03762e-07	2.732e-06
Ndufs8	1411.06	-0.466541	0.0877033	-5.31954	1.04028e-07	2.73467e-06
Rasl11b	52.7096	-2.29983	0.432574	-5.31661	1.05716e-07	2.77463e-06
Dcaf8	1210.26	0.527956	0.0993891	5.31201	1.08423e-07	2.84117e-06
Ubap2l	1237.1	0.868181	0.163516	5.30944	1.0996e-07	2.87688e-06
Rbpms2	649.908	0.724099	0.136496	5.30493	1.12717e-07	2.94434e-06
Chtop	947.22	-0.736532	0.138862	-5.30404	1.1327e-07	2.95412e-06
Spp1	548.614	-2.45589	0.463085	-5.30332	1.13716e-07	2.96109e-06
Ckmt1	15.3666	-6.201	1.16958	-5.30191	1.146e-07	2.97941e-06
Trim35	301.1	-0.931241	0.175676	-5.30089	1.15238e-07	2.9913e-06
Gipc2	30.5745	-2.87001	0.541579	-5.29933	1.16229e-07	3.01229e-06
Axl	1060	-0.591006	0.111585	-5.29647	1.18064e-07	3.05508e-06
Iyd	1752.67	0.768785	0.145174	5.2956	1.18626e-07	3.06482e-06
Pla2g2a	70.8658	-2.78994	0.526915	-5.29485	1.19111e-07	3.07256e-06
Abcc2	7637.42	0.922948	0.174374	5.29294	1.20366e-07	3.10009e-06
Rnd1	130.567	-1.48151	0.280073	-5.28973	1.225e-07	3.15014e-06
Zzef1	478.405	0.677352	0.12813	5.28644	1.24722e-07	3.20229e-06
Rtn4	1270.4	-0.871994	0.165082	-5.2822	1.2764e-07	3.27212e-06
Card6	952.709	0.804444	0.152628	5.27063	1.35953e-07	3.47986e-06
Dock3	114.487	1.15013	0.218238	5.27009	1.36358e-07	3.48482e-06
Pls1	748.108	1.05468	0.200146	5.26953	1.36776e-07	3.4901e-06
Pa2g4	1258.81	0.589289	0.11187	5.26764	1.38189e-07	3.52074e-06
Nip7	205.634	-0.838109	0.159116	-5.26727	1.38469e-07	3.52243e-06
Anxa6	3278.78	0.557477	0.105845	5.26691	1.38735e-07	3.5238e-06
Pde8a	665.878	0.635587	0.120683	5.26656	1.39e-07	3.52511e-06
Cyp2c11	2551.15	3.68442	0.699999	5.26347	1.41363e-07	3.57522e-06
AC120486.9	15.0434	3.01387	0.572609	5.26341	1.41409e-07	3.57522e-06
Tp53i13	441.673	-0.859415	0.163304	-5.26266	1.41988e-07	3.58438e-06
Uqcc2	272.217	-0.84219	0.160164	-5.25829	1.45401e-07	3.66495e-06
Lst1	127.333	-1.17908	0.224409	-5.25412	1.4873e-07	3.74316e-06
Set	1277.74	0.68275	0.129992	5.25225	1.50256e-07	3.7758e-06
Tbx3	136.731	1.36518	0.260277	5.24509	1.56207e-07	3.91941e-06
Chd1l	629.52	0.979875	0.186836	5.24456	1.56657e-07	3.92473e-06
Khnyn	664.674	0.708124	0.135085	5.24206	1.58798e-07	3.97235e-06
Gpsm2	216.322	-0.901032	0.171935	-5.24053	1.60119e-07	3.9953e-06
Vstm4	74.0484	-1.2203	0.232862	-5.24043	1.60199e-07	3.9953e-06
C4bpa	14587.9	-0.732153	0.139829	-5.23606	1.64042e-07	4.08498e-06
Dnah9	34.3646	1.49202	0.285145	5.23249	1.67244e-07	4.15847e-06
Atp2b1	403.581	0.803	0.153512	5.23087	1.68714e-07	4.18361e-06
Medag	19.5867	-4.42957	0.846821	-5.23082	1.68761e-07	4.18361e-06
Leo1	493.453	0.694435	0.132781	5.22993	1.69571e-07	4.19739e-06
Hs3st3a1	18.6285	-2.29639	0.439369	-5.22657	1.72688e-07	4.26816e-06
Cys1	28.0306	-2.33713	0.447223	-5.22587	1.7334e-07	4.27788e-06
Upp1	108.929	-1.49024	0.285231	-5.22468	1.74457e-07	4.29903e-06
Dst	3284.33	0.537208	0.10284	5.22374	1.75341e-07	4.31437e-06
Nmt1	1123.8	0.497603	0.095331	5.21974	1.79176e-07	4.40218e-06
RGD1560108	215.44	-1.09038	0.209204	-5.21204	1.86771e-07	4.58199e-06
Srpx	143.636	-1.52208	0.292157	-5.20982	1.89027e-07	4.63046e-06
Zhx2	112.265	1.05168	0.202036	5.20541	1.93567e-07	4.73466e-06
Dnm2	1434.81	0.584953	0.112436	5.20253	1.96596e-07	4.80166e-06
Zfp821	113.773	-1.04285	0.200472	-5.20198	1.9718e-07	4.80881e-06
RGD1559960	82.2043	1.74596	0.335724	5.20059	1.98657e-07	4.83769e-06
Steap4	1472.49	0.746612	0.143694	5.19586	2.03777e-07	4.95507e-06
Sftpd	23.7923	-3.68693	0.709857	-5.1939	2.05938e-07	5.00026e-06
Mmachc	249.805	0.595679	0.114703	5.19323	2.06682e-07	5.00364e-06
AC111831.1	92.0302	1.08038	0.208026	5.19348	2.06402e-07	5.00364e-06
Prr15l	40.572	-2.35658	0.453993	-5.19078	2.09411e-07	5.06229e-06
Cox14	313.501	-0.716866	0.138131	-5.18977	2.10558e-07	5.08258e-06
LOC259244	543.14	7.8961	1.52157	5.18944	2.10931e-07	5.08418e-06
LOC100174910	246.759	-0.818705	0.157857	-5.18637	2.14433e-07	5.16105e-06
Larp1	1736.61	0.609548	0.117547	5.18556	2.15365e-07	5.17597e-06
Hao2	2309.08	1.45499	0.280778	5.182	2.19515e-07	5.26805e-06
Myl12b	2330.59	0.790021	0.152525	5.17963	2.2233e-07	5.32786e-06
Polr1e	148.205	0.972338	0.187748	5.17895	2.23136e-07	5.33943e-06
Fam83b	16.5125	-4.0431	0.780725	-5.17865	2.23501e-07	5.34044e-06
Gpr153	47.6501	-1.83638	0.354946	-5.17368	2.29523e-07	5.47642e-06
Tspan3	284.681	-1.16031	0.224464	-5.16924	2.35042e-07	5.60003e-06
Qprt	2789.49	-0.679958	0.13157	-5.16802	2.36592e-07	5.62886e-06
Glul	9084	0.975599	0.188809	5.16712	2.37731e-07	5.64783e-06
Supt5h	1816.12	0.57466	0.111343	5.16118	2.454e-07	5.82166e-06
Ccdc6	67.8984	1.18172	0.229387	5.15165	2.58209e-07	6.11674e-06
Mt-nd4l	10351.7	1.09895	0.213392	5.14992	2.60597e-07	6.16447e-06
Psenen	1415.71	0.484749	0.0943025	5.14037	2.74204e-07	6.4771e-06
Sumo4	112.281	1.14052	0.221921	5.13932	2.75734e-07	6.50393e-06
Gprin3	120.511	1.11205	0.216421	5.13837	2.77129e-07	6.52754e-06
Mars	1818	0.917536	0.178648	5.13599	2.80656e-07	6.59183e-06
LOC100910979	8.39463	-4.31465	0.840062	-5.1361	2.80495e-07	6.59183e-06
Chrac1	280.563	-0.711106	0.138468	-5.13553	2.81349e-07	6.59873e-06
AC097784.1	130.946	-0.808088	0.157385	-5.13448	2.82929e-07	6.62639e-06
Nhlrc3	314.334	0.692865	0.134998	5.1324	2.86075e-07	6.6906e-06
AABR07072236.1	388.536	0.681036	0.13274	5.1306	2.88818e-07	6.7452e-06
A3galt2	48.3078	-1.97881	0.38637	-5.12155	3.03041e-07	7.0674e-06
Ccdc68	32.9972	-2.64695	0.516894	-5.12087	3.04129e-07	7.08278e-06
Lmtk2	741.284	0.566575	0.11071	5.11764	3.09377e-07	7.19487e-06
Ankrd22	30.2417	-2.70842	0.529581	-5.11427	3.14959e-07	7.31439e-06
Tenm3	91.7143	-2.08313	0.407384	-5.11343	3.1636e-07	7.33661e-06
Os9	5303.67	0.686728	0.134308	5.11307	3.16964e-07	7.34032e-06
Nol6	511.895	0.587625	0.11496	5.11155	3.1953e-07	7.38572e-06
Flna	1597.96	-0.823013	0.161016	-5.11138	3.19817e-07	7.38572e-06
Atf7ip	532.917	0.807361	0.157965	5.11101	3.20436e-07	7.38969e-06
Pigt	1342.76	0.580762	0.113654	5.10989	3.22339e-07	7.42321e-06
AABR07051947.1	29.0244	-2.10577	0.41219	-5.10874	3.24321e-07	7.44812e-06
Rnf214	201.749	0.746663	0.146149	5.10892	3.24007e-07	7.44812e-06
Col6a1	1701.09	-0.893895	0.175	-5.10797	3.25646e-07	7.46817e-06
Igsf5	1563.59	-0.496683	0.0972433	-5.10764	3.26212e-07	7.4708e-06
Tmem209	384.231	0.748824	0.146621	5.1072	3.2696e-07	7.47757e-06
Aldh2	21729.7	0.506312	0.0991637	5.10582	3.29359e-07	7.52204e-06
Tcp1	1096.04	0.733981	0.143826	5.10325	3.33867e-07	7.59904e-06
Rnf149	546.27	0.661724	0.129664	5.10336	3.33675e-07	7.59904e-06
AABR07029573.1	68.7579	-1.27477	0.249803	-5.10311	3.34109e-07	7.59904e-06
5330417C22Rik	141.592	1.33917	0.262508	5.10144	3.3708e-07	7.64805e-06
Sec31a	1596.73	0.728969	0.142896	5.10138	3.37189e-07	7.64805e-06
Cavin3	1647.82	1.03548	0.203084	5.09879	3.41827e-07	7.74261e-06
Galnt16	28.5173	-2.46205	0.482945	-5.09799	3.43275e-07	7.76478e-06
Tspan33	470.512	-0.753986	0.147916	-5.09738	3.4438e-07	7.76853e-06
Me2	135.179	-0.979248	0.192103	-5.09752	3.44138e-07	7.76853e-06
Resp18	51.1149	2.61135	0.512686	5.09346	3.51582e-07	7.92017e-06
Cdc42se2	305.708	-0.609895	0.119748	-5.09314	3.52187e-07	7.923e-06
Ubr2	1047.7	0.459714	0.0903819	5.08635	3.65015e-07	8.20043e-06
Nt5e	1711.82	0.603753	0.118714	5.0858	3.66085e-07	8.21332e-06
Paf1	933.382	0.746343	0.146761	5.08544	3.66771e-07	8.21755e-06
Pip4p2	359.051	-0.789677	0.155315	-5.08437	3.68851e-07	8.25297e-06
Arid5b	138.311	1.40969	0.2773	5.08364	3.70266e-07	8.27344e-06
Rnasel	113.459	-1.07823	0.212119	-5.08312	3.71288e-07	8.28509e-06
Tmx1	359.478	-0.772895	0.152173	-5.07904	3.79351e-07	8.4536e-06
Itgbl1	56.5284	-1.70096	0.334924	-5.07866	3.80114e-07	8.45919e-06
Rarres2	12511.5	0.76805	0.151316	5.07581	3.85843e-07	8.57516e-06
Osmr	199.815	-2.4617	0.48505	-5.07514	3.87213e-07	8.58253e-06
Mgp	1004.58	-1.37824	0.27156	-5.07529	3.86911e-07	8.58253e-06
Rps21	1945.77	-0.721146	0.142102	-5.07484	3.87817e-07	8.58441e-06
Micu1	999.911	0.544038	0.107216	5.07425	3.89024e-07	8.59962e-06
Shisa4	32.0414	-1.95035	0.384675	-5.07014	3.9752e-07	8.7757e-06
Aqp5	161.113	-1.79947	0.354981	-5.0692	3.99493e-07	8.8075e-06
Cdkn2b	55.3127	-2.50762	0.494855	-5.06739	4.03302e-07	8.87962e-06
Fign	57.8807	1.55588	0.307174	5.06514	4.08098e-07	8.96135e-06
Ncf1	214.632	-0.981827	0.193832	-5.06534	4.07668e-07	8.96135e-06
Rbm47	289.914	0.884203	0.174589	5.06449	4.09489e-07	8.97998e-06
Hs1bp3	284.746	0.610451	0.120588	5.0623	4.14231e-07	9.07194e-06
Golim4	654.118	0.998252	0.197215	5.06175	4.15433e-07	9.08621e-06
Napsa	259.133	-1.04179	0.205909	-5.05949	4.20376e-07	9.18219e-06
Hnrnpr	226.724	0.80256	0.15865	5.05869	4.22151e-07	9.2088e-06
Cenpb	886.186	-0.522996	0.103436	-5.05625	4.27587e-07	9.3151e-06
Vapb	503.587	0.480722	0.0951031	5.05475	4.30954e-07	9.37056e-06
Ap1m2	24.8439	-2.47549	0.48975	-5.05461	4.31267e-07	9.37056e-06
Ak4	749.643	1.09473	0.216598	5.05421	4.3218e-07	9.37807e-06
Mtch1	1435.81	-0.551798	0.109211	-5.05256	4.35917e-07	9.44678e-06
Smoc2	172.629	-1.38045	0.273234	-5.05226	4.36619e-07	9.44959e-06
Gria4	15.1723	-2.75903	0.54682	-5.04559	4.52113e-07	9.77214e-06
RGD621098	281.669	0.855529	0.169631	5.04348	4.57149e-07	9.86809e-06
Tgfb2	130.455	-1.27678	0.253177	-5.04305	4.58173e-07	9.8773e-06
Hnrnph2	766.995	0.633762	0.125722	5.04097	4.6318e-07	9.97224e-06
Kif1a	15.5237	-4.58067	0.909349	-5.03731	4.72123e-07	1.01516e-05
Pde4c	73.837	-1.79812	0.35717	-5.03434	4.79505e-07	1.02969e-05
Sfrp1	106.053	-2.07261	0.411893	-5.0319	4.85631e-07	1.04149e-05
Aprt	790.695	-0.590346	0.117356	-5.03039	4.89474e-07	1.04838e-05
Zadh2	1265.18	0.678806	0.134964	5.02952	4.91719e-07	1.05182e-05
AABR07059168.2	217.106	0.882176	0.175501	5.0266	4.9924e-07	1.06515e-05
Prepl	216.97	0.712182	0.141676	5.02684	4.98616e-07	1.06515e-05
Noc3l	159.411	0.832424	0.165625	5.02595	5.00939e-07	1.0674e-05
Ccpg1os	42.7665	1.32486	0.263627	5.02551	5.02088e-07	1.06847e-05
Fam135a	205.229	-0.953146	0.18975	-5.02317	5.08255e-07	1.08021e-05
Rbpms	678.939	0.752911	0.149938	5.02148	5.1276e-07	1.08838e-05
Bcl3	474.073	-1.32137	0.263173	-5.02094	5.14205e-07	1.09005e-05
Syt17	42.1342	-2.10851	0.420157	-5.01839	5.21053e-07	1.10315e-05
LOC108349594	130.092	-0.914357	0.182358	-5.01407	5.32909e-07	1.12537e-05
LOC100359583	250.837	-0.863088	0.172129	-5.01418	5.32604e-07	1.12537e-05
Prdm2	492.528	0.623202	0.124347	5.01178	5.39281e-07	1.13737e-05
Selenom	158.022	-0.978343	0.19527	-5.01021	5.43718e-07	1.14527e-05
AABR07019061.1	24.6147	-1.83594	0.366485	-5.0096	5.45429e-07	1.14741e-05
Gpat4	1159.25	0.389903	0.0778594	5.00779	5.50599e-07	1.15682e-05
Tanc1	657.227	0.834291	0.166673	5.00557	5.5697e-07	1.16872e-05
LOC685680	14.9042	-3.55317	0.709963	-5.00472	5.59432e-07	1.1724e-05
Klf13	57.3211	1.67983	0.335737	5.00343	5.63195e-07	1.17784e-05
Odr4	154.163	0.802011	0.160295	5.00334	5.63455e-07	1.17784e-05
Ezr	412.544	-1.20307	0.240487	-5.00264	5.65492e-07	1.18061e-05
Ostf1	590.068	-0.670696	0.13411	-5.00107	5.70117e-07	1.18876e-05
Tes	195.512	-1.42482	0.284936	-5.0005	5.7182e-07	1.19081e-05
Tlr2	81.6388	-1.26938	0.253877	-4.99999	5.73333e-07	1.19246e-05
AABR07021996.1	86.8959	-1.39349	0.278766	-4.99879	5.7691e-07	1.1957e-05
F11	4630.67	0.678286	0.13569	4.99881	5.76855e-07	1.1957e-05
Eif2ak1	1219.79	0.432758	0.0865734	4.99874	5.7706e-07	1.1957e-05
Tspo2	36.7777	-1.93264	0.387243	-4.99075	6.01446e-07	1.24467e-05
Timmdc1	600.822	0.664	0.133095	4.98893	6.07147e-07	1.2549e-05
Tmem136	36.2133	-2.27529	0.456242	-4.98702	6.13186e-07	1.2658e-05
Ctbp1	1294.41	-0.446651	0.0895936	-4.9853	6.18649e-07	1.27548e-05
Npas2	426.073	1.01859	0.204385	4.98369	6.23824e-07	1.28455e-05
RGD1565355	459.43	-1.2524	0.251535	-4.97902	6.39074e-07	1.31432e-05
AC141489.1	367.883	-1.24489	0.250096	-4.97767	6.43548e-07	1.32187e-05
Rflnb	33.515	-1.89655	0.381088	-4.97668	6.46857e-07	1.32702e-05
Disp1	291.384	0.832824	0.167387	4.97544	6.50996e-07	1.33221e-05
Cdh2	3376.16	0.671413	0.134945	4.97547	6.50899e-07	1.33221e-05
Tmem132a	592.671	-0.710212	0.142843	-4.97197	6.62744e-07	1.35417e-05
Tuba1a	319.442	-1.07142	0.2155	-4.97179	6.63368e-07	1.35417e-05
Srpx2	47.1484	-2.13912	0.430379	-4.9703	6.68486e-07	1.36294e-05
F2rl1	18.347	-4.426	0.890558	-4.96992	6.69799e-07	1.36393e-05
Iqgap2	2369.38	0.858011	0.172705	4.96808	6.76205e-07	1.37528e-05
Ikbkg	120.199	0.851658	0.171535	4.96493	6.87266e-07	1.39606e-05
Xpot	563.125	0.653545	0.131648	4.96433	6.89399e-07	1.39868e-05
Plpp2	411.338	-0.942703	0.189924	-4.96358	6.92055e-07	1.40235e-05
Csnk2a1	513.834	0.708638	0.142809	4.96213	6.97256e-07	1.41115e-05
Marcks	585.897	-0.972907	0.19618	-4.95926	7.07604e-07	1.43035e-05
Cisd1	1350.32	-0.702958	0.142038	-4.94908	7.45633e-07	1.50538e-05
Nsd3	315.88	0.55142	0.111571	4.94233	7.71924e-07	1.55656e-05
LOC100364116	99.7539	-1.57487	0.31871	-4.94138	7.75731e-07	1.56233e-05
Fstl3	34.5592	-2.02957	0.410859	-4.93981	7.81967e-07	1.57297e-05
Slc28a2	1521.52	0.756287	0.153112	4.93944	7.83485e-07	1.57411e-05
Nop10	926.312	0.527336	0.106781	4.93849	7.87308e-07	1.57834e-05
Tmem268	586.389	-0.651635	0.131958	-4.9382	7.88454e-07	1.57834e-05
Aplp2	5404.67	0.458729	0.0928916	4.93833	7.87948e-07	1.57834e-05
Nxpe1	157.958	0.947922	0.191976	4.93772	7.90413e-07	1.58035e-05
Pcdh1	755.279	0.843741	0.170906	4.93687	7.93873e-07	1.58535e-05
Pxmp2	3889.69	-0.489448	0.0992978	-4.9291	8.26113e-07	1.64774e-05
Mrpl41	622.418	0.735859	0.149379	4.92613	8.38746e-07	1.67092e-05
RGD1563692	14.3343	-5.51276	1.11916	-4.9258	8.40179e-07	1.67176e-05
Hebp2	115.309	-1.49901	0.304432	-4.92395	8.48163e-07	1.68562e-05
Golga3	236.625	0.667912	0.135706	4.92176	8.57701e-07	1.70253e-05
Tenm2	22.8624	2.81047	0.571256	4.91981	8.66265e-07	1.71747e-05
Nop14	338.592	0.635295	0.129261	4.91482	8.88662e-07	1.75976e-05
Lrba	934.246	0.550976	0.112136	4.91348	8.94749e-07	1.7697e-05
Ubtd2	142.776	-0.892418	0.181781	-4.90931	9.13973e-07	1.80556e-05
AABR07038873.1	64.3761	1.18243	0.24097	4.90697	9.24964e-07	1.82509e-05
Aldh6a1	11497.4	0.614746	0.125327	4.90514	9.33608e-07	1.83995e-05
Misp	13.6071	-3.54523	0.722872	-4.90436	9.37307e-07	1.84504e-05
Chd7	428.328	0.780912	0.159272	4.90302	9.43731e-07	1.85548e-05
Ssb	839.909	0.803087	0.163826	4.90209	9.48246e-07	1.85994e-05
Adrm1	1450.44	0.590314	0.120419	4.90217	9.47821e-07	1.85994e-05
Mbnl1	181.983	0.773442	0.157804	4.90127	9.52167e-07	1.86541e-05
LOC100360781	430.343	-0.897735	0.183424	-4.8943	9.86544e-07	1.93047e-05
Nipa2	278.317	-0.754301	0.154135	-4.89376	9.89258e-07	1.9335e-05
Txndc11	1399.83	0.707543	0.144609	4.8928	9.94127e-07	1.94072e-05
Fam46c	117.514	1.34032	0.273974	4.89215	9.97403e-07	1.94482e-05
Ubqln1	3071.61	0.494398	0.101082	4.89108	1.00285e-06	1.95313e-05
Ifit1bl	37.9578	-1.70471	0.348604	-4.89011	1.00779e-06	1.95931e-05
Poll	359.11	0.711544	0.14551	4.88999	1.00839e-06	1.95931e-05
Mt-atp6	500058	1.05492	0.215743	4.88969	1.00993e-06	1.95999e-05
Ppig	973.602	0.816661	0.167107	4.88704	1.02361e-06	1.97959e-05
Tle1	1125.8	0.768287	0.157204	4.88721	1.02274e-06	1.97959e-05
Ubald2	495.329	0.803322	0.164368	4.88734	1.02208e-06	1.97959e-05
Birc6	486.271	0.813553	0.166481	4.88676	1.0251e-06	1.98015e-05
Vwa1	82.2294	-1.56354	0.320037	-4.8855	1.03167e-06	1.98928e-05
Gpx3	547.423	-1.09997	0.225156	-4.88539	1.03224e-06	1.98928e-05
Erg	175.473	0.852268	0.174686	4.87885	1.06704e-06	2.05397e-05
Epb41	648.632	1.06739	0.218958	4.87486	1.08888e-06	2.09356e-05
Dnajc2	388.232	0.606592	0.124441	4.87453	1.09065e-06	2.09395e-05
Plekhd1	50.3966	-2.28621	0.469028	-4.87436	1.09161e-06	2.09395e-05
Eloa	1340.5	0.382918	0.078563	4.87403	1.09344e-06	2.09501e-05
Prss23	733.345	-0.86734	0.178016	-4.87226	1.10331e-06	2.11148e-05
RGD1561157	66.4405	-1.25293	0.25724	-4.87068	1.11214e-06	2.12593e-05
Prrc1	314.945	0.674517	0.138555	4.86822	1.12609e-06	2.15011e-05
Hsp90ab1	13276.1	0.504811	0.103715	4.8673	1.13135e-06	2.15765e-05
AY172581.23	25.7716	-2.2999	0.472553	-4.86697	1.13324e-06	2.15876e-05
Ybx1	2640.57	0.586961	0.120624	4.86604	1.13854e-06	2.16638e-05
Rbm27	179.135	0.863055	0.17743	4.86419	1.14924e-06	2.18422e-05
Npdc1	340.436	-0.703491	0.144713	-4.86129	1.16624e-06	2.21399e-05
LOC691418	19.9449	2.55464	0.525927	4.85741	1.18931e-06	2.2552e-05
Bcam	570.277	-1.18941	0.244936	-4.85599	1.19785e-06	2.26879e-05
Nfkbib	369.192	0.838164	0.172663	4.85433	1.20792e-06	2.28523e-05
Snx9	478.312	0.535195	0.110283	4.85294	1.21646e-06	2.29876e-05
Rhov	16.8394	-3.31768	0.683746	-4.85222	1.22089e-06	2.3045e-05
Myo1b	795.809	0.887395	0.182929	4.85104	1.22816e-06	2.31558e-05
Lingo1	15.8336	-3.48407	0.718827	-4.84689	1.25414e-06	2.36187e-05
Ly6g6c	17.2372	-5.6856	1.17331	-4.84578	1.26118e-06	2.37242e-05
Aard	16.283	-3.11046	0.642108	-4.84414	1.2716e-06	2.38931e-05
Slc39a9	1175.77	0.355636	0.0734376	4.84269	1.2809e-06	2.40405e-05
Tmcc1	237.118	0.796589	0.164565	4.84057	1.29469e-06	2.42718e-05
Gprc5a	19.3113	-3.05592	0.63154	-4.83883	1.30607e-06	2.44298e-05
AABR07048473.1	7.29286	5.96662	1.23304	4.83896	1.30521e-06	2.44298e-05
St6galnac2	79.5589	-1.45408	0.300586	-4.83746	1.31506e-06	2.45702e-05
Serpinb1a	227.933	-2.20648	0.456409	-4.83445	1.33517e-06	2.49002e-05
Herpud1	5327.96	0.900516	0.186274	4.83436	1.33574e-06	2.49002e-05
Rassf6	551.319	0.588086	0.12172	4.83146	1.35536e-06	2.52374e-05
Aqp4	23.0578	-2.38714	0.494222	-4.8301	1.36466e-06	2.5382e-05
Sos1	611.946	0.61819	0.128003	4.8295	1.36876e-06	2.54297e-05
Pnpo	1325.22	-0.502888	0.104156	-4.82822	1.37757e-06	2.55647e-05
Pf4	50.2026	-1.94508	0.403013	-4.82634	1.39065e-06	2.57785e-05
RT1-CE5	642.35	0.668431	0.138507	4.82596	1.39332e-06	2.5799e-05
Cebpz	568.89	0.433366	0.0898202	4.82482	1.40132e-06	2.59182e-05
Itgb4	168.926	-1.29459	0.268436	-4.8227	1.41625e-06	2.6165e-05
Tapbp	705.144	-0.594505	0.123349	-4.81968	1.43787e-06	2.65348e-05
Ephb6	153.439	1.20609	0.250286	4.81885	1.4439e-06	2.66165e-05
Slc51a	9.17888	-4.28714	0.890063	-4.81667	1.45973e-06	2.68783e-05
Ltbp4	1278.94	-0.831329	0.172847	-4.80962	1.51215e-06	2.78125e-05
Arfgap3	646.903	0.569981	0.118541	4.80831	1.52213e-06	2.79649e-05
Akap2	339.939	0.99329	0.206741	4.8045	1.55135e-06	2.84139e-05
Sec24a	529.252	0.819103	0.170488	4.80446	1.55172e-06	2.84139e-05
Arf2	162.354	-0.861683	0.179338	-4.8048	1.54907e-06	2.84139e-05
Stac3	310.638	3.79381	0.789838	4.80328	1.56088e-06	2.855e-05
Cnot3	491.618	0.711642	0.148171	4.80284	1.56429e-06	2.85808e-05
Epn3	16.1675	-3.08699	0.64351	-4.79711	1.6097e-06	2.9378e-05
Sulf1	72.738	-1.82312	0.380176	-4.79547	1.6229e-06	2.95862e-05
AABR07059232.1	21.9279	1.77184	0.369549	4.79461	1.62995e-06	2.96789e-05
Anxa8	52.2468	-4.443	0.926705	-4.79441	1.63157e-06	2.96789e-05
Csmd1	40.9751	1.84499	0.385168	4.79009	1.66706e-06	3.0291e-05
Relt	56.7328	-1.38407	0.288971	-4.78963	1.67089e-06	3.03272e-05
Slc4a3	16.5669	-3.8883	0.812215	-4.78729	1.69053e-06	3.06501e-05
Ylpm1	606.132	0.543324	0.113522	4.78608	1.70068e-06	3.08003e-05
LOC685431	60.7623	-1.40165	0.292964	-4.78439	1.71509e-06	3.10274e-05
Hsp90b1	13104.8	0.694026	0.145193	4.78003	1.75265e-06	3.16723e-05
Tacstd2	20.7887	-4.33921	0.907829	-4.77976	1.75504e-06	3.16808e-05
AABR07035782.1	192.111	-2.7138	0.5678	-4.7795	1.75728e-06	3.16866e-05
AABR07021220.1	88.3261	0.949938	0.198854	4.77706	1.7788e-06	3.20398e-05
Cacnb2	94.605	1.73502	0.36402	4.76629	1.87649e-06	3.37625e-05
Cdkn2c	59.5227	-1.28114	0.268893	-4.7645	1.89324e-06	3.40051e-05
Fbxo9	1180.61	-0.528184	0.11087	-4.76397	1.8982e-06	3.40051e-05
Ppl	151.997	-1.10808	0.232577	-4.76437	1.89443e-06	3.40051e-05
B3galnt2	265.446	0.599364	0.12581	4.76404	1.89751e-06	3.40051e-05
Mrps21	783.83	0.640788	0.134545	4.76261	1.91101e-06	3.41975e-05
Patl1	552.436	0.530336	0.111449	4.75855	1.9499e-06	3.48557e-05
Osbpl9	1489.86	0.547519	0.115114	4.7563	1.97169e-06	3.52072e-05
Tmem128	314.046	-0.821416	0.172889	-4.75113	2.02285e-06	3.60817e-05
Acot12	2513.81	0.592343	0.124716	4.74955	2.03871e-06	3.63254e-05
Aplf	99.0471	-1.0055	0.211782	-4.7478	2.05642e-06	3.66016e-05
Pmepa1	130.144	-1.50131	0.316315	-4.74626	2.07214e-06	3.68021e-05
Cygb	384.708	-1.05552	0.222391	-4.74627	2.07207e-06	3.68021e-05
Cnot4	331.87	0.678442	0.143009	4.74407	2.09467e-06	3.71625e-05
LOC100361934	85.5808	-1.02329	0.215728	-4.74341	2.10151e-06	3.72438e-05
Adamts2	809.241	-1.09047	0.229969	-4.74181	2.11818e-06	3.74991e-05
Lrrc8b	302.976	0.641519	0.135314	4.74097	2.12693e-06	3.76136e-05
Fgd2	142.061	-0.961306	0.202816	-4.73979	2.13938e-06	3.77934e-05
Cisd2	392.053	-0.780437	0.164875	-4.73351	2.20672e-06	3.88999e-05
Cltrn	17.2494	-5.13479	1.08477	-4.73352	2.20664e-06	3.88999e-05
Hars2	476.385	0.473212	0.0999812	4.73301	2.21213e-06	3.89537e-05
Rnf44	784.885	0.534603	0.112959	4.73271	2.21542e-06	3.89702e-05
Cnn3	2148.73	0.643308	0.135954	4.73179	2.22547e-06	3.90931e-05
AABR07045485.1	463.244	-0.886732	0.187405	-4.73164	2.22714e-06	3.90931e-05
Prkd3	1475.28	0.55038	0.116336	4.73095	2.2347e-06	3.91843e-05
Cat	40419.8	0.852939	0.180329	4.72989	2.24639e-06	3.93059e-05
Rnaseh2a	497.733	-0.773155	0.16346	-4.72993	2.24593e-06	3.93059e-05
Sema4a	494.006	-0.763765	0.161712	-4.723	2.32393e-06	4.06197e-05
Tfcp2l1	163.197	-1.398	0.296219	-4.7195	2.36425e-06	4.12807e-05
Yy1	413.349	0.645587	0.136891	4.71608	2.4043e-06	4.19358e-05
Lpl	2018.04	-2.05394	0.435575	-4.71546	2.41164e-06	4.20195e-05
Snai2	237.664	1.13001	0.239804	4.71223	2.45024e-06	4.26471e-05
PVR	104.167	-1.15821	0.245892	-4.71024	2.47424e-06	4.29744e-05
Mettl3	382.615	0.575211	0.122119	4.71025	2.47417e-06	4.29744e-05
Lig3	950.236	0.605853	0.128635	4.70985	2.47895e-06	4.30109e-05
Ltbp3	260.359	-1.08105	0.229552	-4.70937	2.4848e-06	4.30672e-05
Atf6	848.82	0.605834	0.128666	4.70859	2.49437e-06	4.31879e-05
Arrdc3	578.578	1.47327	0.313139	4.70484	2.54065e-06	4.39432e-05
AABR07069728.1	22.1339	3.09532	0.658052	4.70376	2.55409e-06	4.41294e-05
Ccdc186	176.741	0.892258	0.18976	4.70204	2.57578e-06	4.44114e-05
Mt-nd1	302794	0.892265	0.18976	4.70208	2.57529e-06	4.44114e-05
Xpnpep2	2842.4	0.840949	0.178921	4.70011	2.60021e-06	4.47859e-05
Sh3rf2	10.9932	-4.61493	0.982462	-4.69731	2.63611e-06	4.53571e-05
Baiap2	416.204	0.835555	0.177918	4.69629	2.6493e-06	4.55366e-05
Rragc	739.836	-0.549146	0.116951	-4.6955	2.65957e-06	4.55864e-05
Akr7a3	742.782	1.76626	0.376145	4.69569	2.65703e-06	4.55864e-05
Slc25a11	1255.44	-0.395778	0.0842901	-4.69543	2.66047e-06	4.55864e-05
Itih2	24731.4	0.76566	0.163103	4.69434	2.67474e-06	4.57835e-05
Rps13	476.558	-0.530123	0.113013	-4.69084	2.72091e-06	4.64778e-05
Sec23b	557.44	0.916538	0.195389	4.69083	2.72093e-06	4.64778e-05
Efemp2	183.002	-0.885991	0.188967	-4.68859	2.75089e-06	4.691e-05
Clic2	240.413	-0.860846	0.183607	-4.68852	2.7519e-06	4.691e-05
Gjc2	37.3211	-2.3264	0.496228	-4.68818	2.7565e-06	4.694e-05
Ufsp2	948.345	0.549811	0.117296	4.68737	2.76739e-06	4.70769e-05
Slc7a6	62.9992	-1.39396	0.297657	-4.68312	2.82547e-06	4.80155e-05
AABR07073038.1	2340.5	0.528306	0.112818	4.6828	2.82978e-06	4.80395e-05
RGD1310935	7.19418	-6.5986	1.40931	-4.68214	2.839e-06	4.81043e-05
Calr	26261.3	0.754912	0.161233	4.68211	2.83942e-06	4.81043e-05
Gpbp1l1	399.269	0.743882	0.158939	4.6803	2.86462e-06	4.84816e-05
Nxpe2	48.0202	1.44664	0.309425	4.67525	2.93594e-06	4.96378e-05
Klf15	1515.65	1.08906	0.233006	4.67394	2.95471e-06	4.99042e-05
AABR07035796.1	44.5587	1.52182	0.325638	4.67336	2.96305e-06	4.99939e-05
Atf2	219.566	0.886134	0.189671	4.67195	2.98357e-06	5.02888e-05
Nsmce2	410.115	0.642502	0.137548	4.67112	2.99568e-06	5.03902e-05
Slfn13	490.681	-0.729101	0.156085	-4.67117	2.99495e-06	5.03902e-05
Bod1l1	262.943	0.710887	0.152207	4.67053	3.0043e-06	5.04838e-05
Fgf19	4.01029	-7.08502	1.5172	-4.6698	3.01495e-06	5.06113e-05
Mcrs1	341.615	-0.587008	0.125735	-4.66859	3.03273e-06	5.08582e-05
Plcb3	542.675	0.489406	0.104839	4.66816	3.03904e-06	5.09124e-05
Serpina5	125.626	2.19749	0.470881	4.66677	3.05976e-06	5.12076e-05
AABR07037536.1	12.6772	2.99323	0.641633	4.66502	3.0858e-06	5.15913e-05
Ankh	1241.84	0.815066	0.174833	4.66197	3.13191e-06	5.22038e-05
Srsf7	525.325	-0.553403	0.118704	-4.66205	3.13079e-06	5.22038e-05
LOC103693430	70.9248	-1.54469	0.331335	-4.662	3.13145e-06	5.22038e-05
AABR07035780.1	139.62	-2.81364	0.603677	-4.66083	3.14939e-06	5.24422e-05
Fanci	324.481	-0.767904	0.16484	-4.65847	3.18567e-06	5.2993e-05
Prtg	13.8002	3.25864	0.699558	4.65814	3.1908e-06	5.3025e-05
Obsl1	55.7001	-1.49247	0.320514	-4.65648	3.21659e-06	5.33463e-05
Trim25	658.545	0.738071	0.1585	4.65659	3.21495e-06	5.33463e-05
Rev1	555.966	-0.623254	0.13387	-4.65567	3.22933e-06	5.35039e-05
Ace2	31.8927	-2.42783	0.521602	-4.65455	3.24683e-06	5.37401e-05
Ndufaf2	156.758	1.01425	0.218163	4.64903	3.33493e-06	5.5143e-05
Kidins220	1175.46	0.379066	0.0815578	4.64783	3.35451e-06	5.54114e-05
Gak	1342.82	0.469427	0.101065	4.64481	3.40382e-06	5.61138e-05
Syngr2	1376.52	0.676928	0.145733	4.64499	3.40089e-06	5.61138e-05
AC130391.3	217.983	1.56683	0.33752	4.64218	3.44745e-06	5.67765e-05
Kcnk1	26.0448	-2.12876	0.458744	-4.6404	3.47727e-06	5.72106e-05
Tsx	316.043	-2.95599	0.63708	-4.6399	3.48581e-06	5.72942e-05
Mrps28	472.903	-0.683533	0.147333	-4.63938	3.49462e-06	5.73819e-05
Pqlc3	63.6429	-1.37966	0.297434	-4.63855	3.50864e-06	5.75548e-05
Tbc1d1	243.795	-0.557712	0.120303	-4.6359	3.55381e-06	5.82382e-05
Itgb1bp1	301.287	-0.59138	0.127597	-4.63475	3.57374e-06	5.85067e-05
Acsf2	1697.37	0.625056	0.135077	4.62742	3.70253e-06	6.05552e-05
Epas1	3981.64	0.508641	0.109997	4.62412	3.76199e-06	6.14669e-05
Cep85	331.564	-0.575089	0.124425	-4.62198	3.80103e-06	6.19212e-05
AABR07043748.1	176.695	-1.01123	0.21878	-4.62214	3.79802e-06	6.19212e-05
Tap1	534.603	-0.766828	0.165902	-4.62218	3.79737e-06	6.19212e-05
Cd2ap	484.27	0.780134	0.168802	4.6216	3.80798e-06	6.19734e-05
Cpb1	59.4709	-2.29077	0.496275	-4.61593	3.91339e-06	6.36262e-05
Pitpnm3	81.131	-1.7474	0.378601	-4.61542	3.923e-06	6.37199e-05
Mrpl40	403.019	0.798177	0.172974	4.61444	3.94159e-06	6.3959e-05
AABR07070117.1	1835.63	0.66673	0.144517	4.61351	3.95916e-06	6.41812e-05
Tmem200b	42.7059	-1.31086	0.284172	-4.61291	3.97064e-06	6.43042e-05
Rassf7	297.712	-0.966006	0.209464	-4.61179	3.9921e-06	6.45253e-05
Anxa5	781.844	-0.623813	0.135261	-4.61191	3.98984e-06	6.45253e-05
RGD1309362	38.2773	-8.4198	1.8261	-4.6108	4.0112e-06	6.47706e-05
Cybc1	449.366	-0.639298	0.138811	-4.60555	4.11385e-06	6.63634e-05
Msra	350.351	0.843106	0.183181	4.60259	4.17273e-06	6.72477e-05
Gli1	27.0595	-3.51432	0.763684	-4.60179	4.18866e-06	6.7387e-05
Upk1b	49.3116	-2.45878	0.534314	-4.60175	4.18953e-06	6.7387e-05
Actn4	4635.68	0.456958	0.0993196	4.60089	4.20696e-06	6.76016e-05
Sf1	2729.63	0.535315	0.116373	4.60001	4.22477e-06	6.77561e-05
Aqp3	12.6283	-5.18429	1.12699	-4.60012	4.2225e-06	6.77561e-05
Srpk1	518.05	0.53193	0.11579	4.5939	4.35032e-06	6.9702e-05
LOC298111	205.769	8.31587	1.81028	4.59369	4.35479e-06	6.97061e-05
Tradd	180.873	-0.899197	0.195756	-4.59347	4.35938e-06	6.97121e-05
Lpcat2	68.922	-1.23568	0.269031	-4.59307	4.36776e-06	6.97787e-05
Socs2	1063.93	-2.01642	0.439103	-4.59212	4.38757e-06	7.00275e-05
Zfp362	145.931	1.05625	0.230057	4.59127	4.40552e-06	7.02462e-05
Fst	82.3077	-2.6645	0.580398	-4.59081	4.41533e-06	7.03347e-05
Utp23	105.499	0.760135	0.165588	4.59051	4.42156e-06	7.03663e-05
AC135826.1	77.6221	-1.63159	0.355587	-4.58846	4.46531e-06	7.09941e-05
Tox4	745.294	0.400527	0.0873069	4.58758	4.48421e-06	7.12261e-05
AABR07064719.1	202.807	0.692421	0.150961	4.58674	4.50215e-06	7.14424e-05
Uba1	2558.71	0.499035	0.10881	4.58628	4.51211e-06	7.15319e-05
RGD1559909	226.865	-0.917211	0.200009	-4.58585	4.52136e-06	7.16099e-05
Txndc12	1270.88	0.483022	0.105358	4.58459	4.54879e-06	7.19753e-05
Phf3	701.242	0.72717	0.15862	4.58434	4.55418e-06	7.19917e-05
AABR07049994.1	680.664	-0.633947	0.138293	-4.58408	4.55981e-06	7.20118e-05
Ckb	438.21	-0.75176	0.164032	-4.583	4.58342e-06	7.23157e-05
RT1-CE7	685.444	-0.753128	0.164343	-4.58265	4.59123e-06	7.23699e-05
Lmnb1	167.577	-0.898105	0.196004	-4.58208	4.60382e-06	7.24992e-05
Palmd	1374.26	0.79248	0.173017	4.58035	4.6419e-06	7.30294e-05
Cers5	183.6	-0.803033	0.175354	-4.57949	4.66112e-06	7.3262e-05
Tbpl1	206.244	-0.719199	0.157059	-4.57917	4.66815e-06	7.33029e-05
Slc35a4	486.97	-0.634883	0.138719	-4.57675	4.72262e-06	7.40877e-05
Art4	133.408	-1.32147	0.288781	-4.57601	4.73926e-06	7.42784e-05
Oaf	3421.08	-0.685114	0.149761	-4.57472	4.76851e-06	7.4666e-05
RGD1561958	3.26693	-6.4976	1.42056	-4.57397	4.78568e-06	7.4864e-05
Pgam1	3033.14	-0.438771	0.0959347	-4.57365	4.79307e-06	7.49087e-05
Mug1	75825.4	0.839023	0.183478	4.57289	4.81047e-06	7.50595e-05
Iars	508.324	0.806746	0.176422	4.57283	4.8118e-06	7.50595e-05
Clybl	376.377	1.00617	0.220108	4.57125	4.84826e-06	7.5557e-05
Ggt1	79.1125	-2.05497	0.449597	-4.5707	4.86099e-06	7.56841e-05
Hal	3509.41	1.0945	0.239518	4.5696	4.88648e-06	7.60093e-05
Sars	1335.82	0.643811	0.140902	4.56921	4.89565e-06	7.60804e-05
Cldn23	9.5345	-3.95033	0.864838	-4.56771	4.93073e-06	7.65536e-05
Pycr2	150.103	-0.760432	0.166573	-4.56516	4.99117e-06	7.74193e-05
LOC689574	3894.72	0.557435	0.122186	4.56217	5.06287e-06	7.84578e-05
Rufy3	902.961	0.41353	0.0906489	4.56188	5.06974e-06	7.84908e-05
AABR07029198.1	732.996	0.941773	0.206488	4.56091	5.09335e-06	7.87089e-05
Snx8	522.543	0.511651	0.112179	4.56104	5.09018e-06	7.87089e-05
AABR07048474.1	671.423	8.25845	1.81125	4.55952	5.12702e-06	7.91553e-05
Tmc5	16.2357	-4.33292	0.950347	-4.55931	5.13232e-06	7.91631e-05
Acadm	6960.7	0.569636	0.125028	4.55606	5.21213e-06	8.01699e-05
Wdr86	32.6854	-1.58522	0.347927	-4.55618	5.20925e-06	8.01699e-05
Ndufb2	1187.2	-0.558791	0.122643	-4.55625	5.20747e-06	8.01699e-05
Satb2	25.254	2.13332	0.468432	4.55418	5.25904e-06	8.08162e-05
Psmd7	2119.88	0.537433	0.118025	4.55357	5.27434e-06	8.09761e-05
Rab25	27.9807	-2.05277	0.451174	-4.54983	5.36899e-06	8.23527e-05
RGD1359508	48.359	1.47524	0.324322	4.54868	5.39842e-06	8.27275e-05
Tspan13	246.233	-0.811837	0.178544	-4.547	5.44163e-06	8.33123e-05
Mrpl50	483.283	-0.909334	0.200047	-4.5456	5.47783e-06	8.3789e-05
Pde4dip	807.242	0.590732	0.12999	4.54444	5.50817e-06	8.41752e-05
Tma7	623.041	0.743659	0.163733	4.54189	5.5751e-06	8.51193e-05
Clec3b	77.7202	-2.40043	0.529055	-4.53719	5.70083e-06	8.69588e-05
Mrps9	904.694	0.485222	0.106961	4.53643	5.72136e-06	8.71914e-05
Rmdn2	1682.02	0.980474	0.216158	4.53592	5.73541e-06	8.7325e-05
Hspb2	28.2898	-1.51987	0.335096	-4.53564	5.74287e-06	8.73582e-05
AC127784.2	22.006	-2.54329	0.560813	-4.53501	5.76e-06	8.75382e-05
Hibadh	4548.14	0.729508	0.160933	4.533	5.81528e-06	8.82973e-05
Ddx39a	312.522	-0.734212	0.161979	-4.53276	5.82173e-06	8.83141e-05
LOC100910270	302.269	-1.08628	0.23974	-4.5311	5.86785e-06	8.89321e-05
Rmnd1	1354.38	0.551914	0.121874	4.52858	5.93818e-06	8.99156e-05
Dynlrb1	1450.95	0.659603	0.145708	4.52689	5.98592e-06	9.05555e-05
Ptgs2	20.8234	-1.73386	0.383325	-4.52321	6.09074e-06	9.2057e-05
Top1	371.273	0.677069	0.14974	4.52162	6.13683e-06	9.25844e-05
Tmem54	5.86691	-6.55941	1.45063	-4.52177	6.13257e-06	9.25844e-05
Gtf2a2	332.113	-0.729161	0.161373	-4.51848	6.22845e-06	9.38809e-05
Sumf1	460.106	-0.547476	0.121199	-4.51718	6.26674e-06	9.43721e-05
Tmem229b	121.661	-0.839247	0.185925	-4.51389	6.36483e-06	9.57621e-05
LOC681367	144.217	0.81582	0.180748	4.51359	6.37406e-06	9.58138e-05
Sec61g	875.937	-0.715975	0.158646	-4.51303	6.39078e-06	9.59779e-05
Dnajc3	3945.78	0.714595	0.158422	4.51071	6.46118e-06	9.6947e-05
Asns	230.842	3.15375	0.699334	4.50965	6.49336e-06	9.72533e-05
Laptm5	799.241	-0.529811	0.117483	-4.5097	6.49192e-06	9.72533e-05
Adcy1	449.261	1.83023	0.406043	4.50747	6.56053e-06	9.81705e-05
Ring1	638.915	0.593245	0.131702	4.50445	6.65441e-06	9.94852e-05
Serhl2	101.203	-1.0686	0.237394	-4.50137	6.75172e-06	0.000100849
AABR07068272.1	765.173	0.431398	0.0958735	4.49966	6.80636e-06	0.000101573
AABR07072096.1	140.614	-2.83282	0.62996	-4.49683	6.8974e-06	0.000102839
Chrm3	14.4177	-3.2562	0.724209	-4.49622	6.91731e-06	0.000103043
Gsk3a	702.101	0.567258	0.12624	4.49347	7.00717e-06	0.000104288
Il7	22.176	-2.10939	0.469621	-4.49169	7.06589e-06	0.000105061
AABR07034428.1	20.8725	-7.08054	1.57643	-4.49152	7.07182e-06	0.000105061
AABR07040840.1	50.1496	1.38798	0.309056	4.49102	7.08839e-06	0.000105212
LOC108352650	5486.41	-0.526381	0.117226	-4.4903	7.11215e-06	0.00010547
Zc2hc1a	55.0012	-1.1942	0.26602	-4.48913	7.15131e-06	0.000105956
Adap1	28.2973	-1.88552	0.420344	-4.48567	7.26863e-06	0.000107598
Mylip	163.003	-0.942008	0.210025	-4.48521	7.28424e-06	0.000107732
Dnajc21	358.071	0.54544	0.121695	4.48203	7.39364e-06	0.000109253
Casc4	74.507	-1.46112	0.326306	-4.47777	7.54279e-06	0.000111357
Ehbp1l1	500.654	-0.496903	0.110993	-4.47687	7.57442e-06	0.000111724
Mt-nd6	67395.9	1.09277	0.244124	4.4763	7.59485e-06	0.000111926
Rcn2	191.343	-0.879934	0.196746	-4.47244	7.73335e-06	0.000113865
AABR07021492.1	5.47706	6.49302	1.45254	4.4701	7.81835e-06	0.000115015
Upk3b	71.5554	-1.83367	0.410262	-4.4695	7.84045e-06	0.000115237
Tsg101	978.641	0.503109	0.112612	4.46762	7.90961e-06	0.00011615
Eif4g3	1333.83	0.573609	0.128406	4.46714	7.92717e-06	0.000116305
Bri3bp	94.6749	0.936318	0.209689	4.46527	7.99695e-06	0.000117225
Gal3st1	14.1641	-5.00099	1.12009	-4.4648	8.01452e-06	0.000117378
Ifi44l	98.6343	-1.04124	0.23325	-4.46407	8.04184e-06	0.000117674
Rab7b	76.3571	-1.58852	0.355979	-4.46241	8.10447e-06	0.000118486
Hhip	49.4318	1.46843	0.329082	4.4622	8.1124e-06	0.000118497
Lilrb3	353.961	1.13274	0.25404	4.45891	8.23791e-06	0.000120118
Atp9b	633.474	0.459414	0.10303	4.45901	8.23373e-06	0.000120118
LOC100360846	208.075	1.19963	0.269072	4.4584	8.25738e-06	0.000120296
Ftsj3	521.417	0.542421	0.121674	4.45798	8.27348e-06	0.000120424
Kcnj8	350.457	-0.866888	0.194731	-4.45173	8.5182e-06	0.000123443
Arfgef2	869.472	0.404303	0.0908084	4.45227	8.49691e-06	0.000123443
Phactr4	184.571	0.918467	0.206317	4.45173	8.51799e-06	0.000123443
Sema3b	21.0242	-2.50357	0.562301	-4.45236	8.49319e-06	0.000123443
Aox2	93.0036	2.20924	0.496258	4.4518	8.51537e-06	0.000123443
Zbtb45	148.638	0.802898	0.180397	4.45073	8.55782e-06	0.000123909
Rmdn3	214.931	0.521658	0.11722	4.45024	8.57763e-06	0.000124087
AABR07064415.1	384.847	0.811482	0.182371	4.44962	8.60216e-06	0.000124333
Rala	293.211	0.664619	0.149373	4.44941	8.61081e-06	0.000124349
Sdha	4128.59	0.563123	0.126623	4.44725	8.69767e-06	0.000125494
AABR07036007.1	665.107	-0.752274	0.169205	-4.44594	8.75079e-06	0.00012615
Pes1	991.653	0.42124	0.0947538	4.44563	8.76355e-06	0.000126224
Sult1c2	11.8689	1.88308	0.423702	4.44434	8.81617e-06	0.000126872
Nadsyn1	350.068	0.816123	0.183687	4.44301	8.87105e-06	0.00012755
Nipbl	786.689	0.53408	0.12024	4.44178	8.92177e-06	0.000128168
Snx6	378.532	-0.510215	0.11489	-4.44092	8.95768e-06	0.000128572
Suox	2116.28	0.659329	0.148523	4.43924	9.02767e-06	0.000129464
Lyar	237.144	0.809283	0.182318	4.43885	9.0441e-06	0.000129588
Slc25a38	777.759	-0.620822	0.13988	-4.43824	9.0697e-06	0.000129842
Rbfox2	104.238	0.91726	0.206768	4.43617	9.15715e-06	0.000130981
Jaml	44.6548	-1.6982	0.38286	-4.43557	9.18282e-06	0.000131234
Abcg2	450.791	-1.304	0.294006	-4.43529	9.19465e-06	0.00013129
Kcna6	10.4069	-4.93324	1.11232	-4.43507	9.20406e-06	0.000131311
Lzts1	20.5369	2.25462	0.508542	4.43349	9.27192e-06	0.000132165
Adora2a	280.235	-0.970963	0.219036	-4.43289	9.29765e-06	0.000132417
LOC100910996	15.9607	-6.00626	1.35528	-4.43176	9.34661e-06	0.000133
RGD1564664	112.807	-0.859617	0.19398	-4.43146	9.35969e-06	0.000133072
AABR07030603.1	31.6651	1.78816	0.403619	4.43033	9.40874e-06	0.000133654
Lonp1	2721.16	0.377069	0.0851155	4.43009	9.41945e-06	0.000133692
Drosha	591.102	0.510755	0.115303	4.4297	9.43656e-06	0.000133819
Prox1	1357.79	0.569317	0.128529	4.42949	9.44574e-06	0.000133835
Tmem248	1746.73	0.51391	0.116052	4.42826	9.49942e-06	0.00013448
Atp6v1b1	6.01357	-6.34956	1.43404	-4.42775	9.522e-06	0.000134685
Sf3b4	572.985	0.626598	0.141527	4.42742	9.53672e-06	0.000134712
Ttpa	2518.52	0.753599	0.170215	4.42734	9.54025e-06	0.000134712
Rps23	4473.55	-0.527968	0.119262	-4.42694	9.55776e-06	0.000134844
Kif13b	337.324	0.68293	0.15431	4.4257	9.61288e-06	0.000135506
Slc22a5	454.71	-0.832127	0.188092	-4.42406	9.68652e-06	0.000136428
Ilk	1884.99	0.386102	0.0873132	4.42204	9.77739e-06	0.000137591
Npc1	1377.38	0.674513	0.152562	4.42123	9.81392e-06	0.000137987
Pllp	13.5778	-3.24542	0.734099	-4.42096	9.82641e-06	0.000138046
Cdc37l1	658.076	0.626154	0.141674	4.41967	9.88503e-06	0.000138751
Id3	711.322	-0.800186	0.181098	-4.41853	9.93723e-06	0.00013934
Ipo5	991.789	0.421847	0.0954753	4.41839	9.94383e-06	0.00013934
AABR07007717.3	46.5635	-6.00589	1.3595	-4.41772	9.97473e-06	0.000139655
Postn	134.87	-3.56257	0.80649	-4.41737	9.99074e-06	0.00013976
Map1b	60.7685	-1.98076	0.448482	-4.4166	1.00267e-05	0.000140145
Tmod1	78.3122	-1.24151	0.281147	-4.41586	1.00608e-05	0.000140503
Enpp3	1219.3	0.738097	0.167186	4.41482	1.01094e-05	0.000141063
Sod3	823.938	0.937635	0.212491	4.4126	1.02139e-05	0.0001424
Fam13a	431.734	1.1804	0.267887	4.40633	1.05135e-05	0.000146454
Polr2a	1806.19	0.714807	0.162233	4.40604	1.05276e-05	0.000146528
Ensa	712.138	-0.428286	0.0972127	-4.40565	1.05465e-05	0.000146666
Rapgef4	612.338	0.862951	0.195886	4.40537	1.05604e-05	0.000146736
Sh3d19	1290.35	0.554375	0.125898	4.40336	1.06587e-05	0.000147977
AABR07035780.3	48.9788	-3.12082	0.708995	-4.40175	1.07382e-05	0.000148957
Hdhd5	357.919	0.509995	0.115878	4.40115	1.07678e-05	0.000149241
LOC108348180	600.16	0.552342	0.12552	4.40045	1.08028e-05	0.00014959
Fzd2	37.9265	-2.01447	0.457805	-4.40028	1.0811e-05	0.00014959
AABR07002065.2	108.073	1.04744	0.238141	4.3984	1.09049e-05	0.000150764
Pdlim4	82.37	-1.35162	0.307365	-4.39743	1.09538e-05	0.000151312
Rpl24	3970.87	-0.501288	0.114016	-4.39663	1.09943e-05	0.000151745
Pld2	122.282	-0.817743	0.186076	-4.39467	1.1094e-05	0.000152994
Gpr182	1028.5	0.659217	0.150033	4.39382	1.11376e-05	0.000153467
Haspin	68.2287	-1.32468	0.301523	-4.39332	1.11634e-05	0.000153567
Ddx46	1281.69	0.473109	0.107684	4.39348	1.11551e-05	0.000153567
Cpq	2491.81	0.506089	0.115257	4.39097	1.12848e-05	0.000155107
Reln	1051.87	0.600436	0.136838	4.38793	1.14435e-05	0.000157159
Pdxdc1	258.128	0.66341	0.151221	4.38702	1.14916e-05	0.000157687
LOC100362350	13.065	2.66891	0.608951	4.3828	1.17163e-05	0.000160638
Gstm2	10451.4	0.851639	0.194325	4.38255	1.17297e-05	0.000160688
AABR07048463.1	200.879	6.79473	1.55227	4.3773	1.20161e-05	0.000164476
Nptx2	139.193	1.64741	0.376415	4.37658	1.20556e-05	0.000164879
AABR07068316.1	839.34	-0.861061	0.196802	-4.37526	1.21289e-05	0.000165744
Thbs3	35.9029	-1.80087	0.411626	-4.37502	1.21422e-05	0.00016579
LOC100365958	1612.75	1.11766	0.25551	4.37424	1.21858e-05	0.000166248
Stau1	1668.83	0.331065	0.0757127	4.37265	1.22746e-05	0.000167321
Klrd1	14.3116	-2.46298	0.563403	-4.37161	1.23334e-05	0.000167984
AC128792.1	19.7162	2.04512	0.468171	4.36833	1.25201e-05	0.000170247
Masp1	1701	0.647602	0.148248	4.36838	1.25173e-05	0.000170247
Ptn	177.012	-1.2274	0.281058	-4.36708	1.2592e-05	0.000171006
AABR07072207.1	447.181	-0.825922	0.189128	-4.367	1.25966e-05	0.000171006
Arpc4	1279.89	-0.394234	0.0902936	-4.36613	1.26466e-05	0.000171543
Mrps2	853.3	0.604145	0.138446	4.36375	1.27852e-05	0.000173282
Rps28	1391.82	-0.616923	0.141419	-4.36236	1.28666e-05	0.000174242
AABR07010030.2	130.79	1.21226	0.277926	4.3618	1.28995e-05	0.000174544
Ero1a	316.999	0.913172	0.209473	4.35938	1.30432e-05	0.000176344
Mcm10	291.155	0.94937	0.217874	4.35743	1.31601e-05	0.00017778
Onecut2	245.171	0.860667	0.19753	4.35714	1.31775e-05	0.000177869
Pkp1	15.0204	-5.77949	1.3268	-4.35597	1.32476e-05	0.00017867
LOC685849	16.2252	-2.26303	0.519558	-4.35569	1.32649e-05	0.000178757
Myrip	53.1812	-1.58359	0.363661	-4.35458	1.33325e-05	0.000179522
Rtp4	530.771	0.715246	0.164259	4.35438	1.33443e-05	0.000179534
Epb41l4b	820.804	0.485519	0.111529	4.35329	1.34111e-05	0.000180286
Psmf1	1465.79	0.579278	0.133083	4.35274	1.34446e-05	0.000180589
Fam219b	473.459	-0.650704	0.14956	-4.35078	1.35652e-05	0.000182063
Eif3c	2781.85	0.471441	0.108367	4.35039	1.35895e-05	0.00018224
Ndufc1	1194.45	-0.659306	0.151578	-4.3496	1.36384e-05	0.000182748
Arf1	3316.45	0.529471	0.121741	4.34916	1.3666e-05	0.00018297
Lamb2	528.852	-0.680811	0.156608	-4.34722	1.37872e-05	0.000184443
Ppp2r5c	917.299	0.56919	0.130961	4.34625	1.38483e-05	0.000185111
Edem3	236.942	0.862798	0.198566	4.34514	1.3919e-05	0.000185905
Utp14a	464.719	0.604353	0.139118	4.34417	1.39801e-05	0.00018657
C1rl	1314.47	0.597725	0.137625	4.34313	1.40467e-05	0.000187309
Prrg4	64.1063	-1.57418	0.362515	-4.34239	1.40938e-05	0.000187785
AABR07028009.1	70.3187	-2.1238	0.489116	-4.34213	1.4111e-05	0.000187862
Kcnn4	43.4179	-1.5543	0.357999	-4.34165	1.4142e-05	0.000188124
Vps9d1	574.486	-0.644633	0.148497	-4.34106	1.41796e-05	0.000188472
Eif5b	1006.07	0.422009	0.0972334	4.34016	1.42377e-05	0.000189092
Thrap3	1971	0.555195	0.127957	4.33892	1.43187e-05	0.000189888
Abhd8	97.4735	-0.908497	0.209385	-4.33889	1.43206e-05	0.000189888
Pdss1	64.9306	-0.994993	0.229414	-4.33712	1.44364e-05	0.000191271
AC126148.1	89.9234	-1.25853	0.290292	-4.33539	1.45503e-05	0.000192625
Mir3064	108.057	-1.5061	0.347427	-4.33501	1.45753e-05	0.000192802
Aup1	3147.47	0.532769	0.122912	4.33457	1.46045e-05	0.000193034
Clk2	1863.35	0.423682	0.0977564	4.33406	1.46386e-05	0.00019333
LOC100361008	86.0213	-1.34593	0.3106	-4.33331	1.46881e-05	0.000193829
Ptprh	174.332	-1.11409	0.257142	-4.33259	1.47365e-05	0.000194158
Bicdl2	26.8907	-2.15657	0.497744	-4.33269	1.47298e-05	0.000194158
Cpm	111.412	-0.877971	0.202797	-4.32931	1.49575e-05	0.000196912
Vps53	426.892	0.482957	0.111589	4.32802	1.50458e-05	0.000197918
Bpi	12.7022	-5.04679	1.16627	-4.3273	1.50946e-05	0.000198345
Cry1	183.127	-0.949093	0.219332	-4.32719	1.51023e-05	0.000198345
Tsc2	738.491	0.474554	0.109674	4.32696	1.51182e-05	0.000198397
Helz	381.897	0.789976	0.182699	4.32392	1.53278e-05	0.000200987
Cpd	355.802	0.845816	0.195651	4.3231	1.53854e-05	0.000201583
Syt13	10.4348	-3.95089	0.914058	-4.32236	1.54366e-05	0.000201933
Tbccd1	292.009	0.607443	0.140533	4.32241	1.54333e-05	0.000201933
AABR07030926.1	73.5308	-1.35159	0.312723	-4.32199	1.5463e-05	0.00020212
Phkb	322.667	0.653885	0.151323	4.32111	1.55247e-05	0.000202765
Fbln1	169.74	-2.10763	0.48779	-4.32078	1.55481e-05	0.00020291
Snrk	315.58	0.660783	0.152944	4.32043	1.55727e-05	0.000202976
Hecw2	31.5318	1.55591	0.360135	4.32036	1.55777e-05	0.000202976
Riox2	100.965	0.770692	0.178474	4.31822	1.5729e-05	0.000204787
Lrrc17	20.1286	-2.55561	0.592065	-4.31643	1.58571e-05	0.00020613
Aifm2	784.926	-0.754347	0.174759	-4.3165	1.58522e-05	0.00020613
Rps27l	814.776	-0.71276	0.165168	-4.31537	1.59338e-05	0.000206802
Tmem94	686.805	0.536507	0.124321	4.31551	1.59237e-05	0.000206802
AABR07044273.1	111.821	1.37527	0.31873	4.31484	1.59719e-05	0.000207134
Tpd52	399.543	-0.608467	0.14103	-4.31444	1.60007e-05	0.000207344
Cwc15	873.236	0.588638	0.136475	4.31315	1.60945e-05	0.000208397
Pten	871.322	0.554502	0.128601	4.3118	1.61927e-05	0.000209504
Zdhhc23	109.701	1.13225	0.262631	4.31119	1.6238e-05	0.000209926
Tmem86b	4889.23	0.482393	0.111963	4.30852	1.64354e-05	0.000212146
AABR07015057.1	1208.51	-2.10279	0.488054	-4.30852	1.64349e-05	0.000212146
Ahsa2	336.361	0.564475	0.13107	4.30666	1.65735e-05	0.000213762
Col16a1	174.104	-1.11684	0.259377	-4.30583	1.66359e-05	0.0002144
Fam83f	17.3907	-2.50632	0.582701	-4.30122	1.69864e-05	0.000218638
Mpc2	1359.66	-0.830317	0.193045	-4.30115	1.69912e-05	0.000218638
Kif21a	262.258	0.912757	0.212294	4.2995	1.71181e-05	0.000220099
Hspa5	14726.5	0.678156	0.157811	4.29728	1.72908e-05	0.000222091
Sumo1	759.382	-0.493421	0.114825	-4.29716	1.72998e-05	0.000222091
AABR07072853.4	39.3824	2.86973	0.66794	4.29639	1.73602e-05	0.000222692
Kif23	110.027	-0.999147	0.232587	-4.29579	1.74071e-05	0.000223121
Gsap	1129.56	-0.489885	0.114066	-4.29474	1.74899e-05	0.000223826
Mlph	23.8493	-2.23892	0.521315	-4.29476	1.74882e-05	0.000223826
Apc	530.461	0.659869	0.153652	4.29458	1.75027e-05	0.000223826
Cldn7	49.6216	-1.70771	0.397728	-4.29366	1.7575e-05	0.000224577
Snx5	1543.44	-0.407247	0.0948557	-4.29333	1.76012e-05	0.000224738
Sirpa	1356.83	-0.649417	0.15129	-4.29252	1.76657e-05	0.000225388
Sept8	346.059	-0.803408	0.187222	-4.2912	1.77711e-05	0.000226557
Ssbp3	522.105	0.62665	0.146047	4.29073	1.78086e-05	0.000226861
Lhx2	147.887	1.04305	0.243216	4.2886	1.79807e-05	0.0002287
Cdc25c	98.6866	-0.786896	0.183479	-4.28876	1.79673e-05	0.0002287
Itsn2	769.495	0.382911	0.0893017	4.28783	1.80424e-05	0.000229133
Pmaip1	27.5882	-1.95657	0.4563	-4.2879	1.8037e-05	0.000229133
LOC100360750	111.526	0.963485	0.224856	4.2849	1.82818e-05	0.000231994
Clca4	9.4084	-4.41674	1.0312	-4.2831	1.84309e-05	0.000233708
Ehf	70.5385	-1.86602	0.435688	-4.28293	1.84451e-05	0.000233709
Uqcr11	1633.63	-0.582334	0.136007	-4.28163	1.85529e-05	0.000234894
Ugt2b15	19216.9	0.833654	0.194718	4.28133	1.85779e-05	0.000235031
Pgs1	273.48	-0.714312	0.166863	-4.28084	1.86188e-05	0.000235369
RGD1565616	529.319	0.664207	0.155174	4.28041	1.86549e-05	0.00023564
AABR07068044.2	31.7474	1.83194	0.427998	4.28024	1.86688e-05	0.00023564
Erp44	1618.24	0.544184	0.127183	4.27875	1.87942e-05	0.000237043
Vps29	856.452	0.473826	0.110752	4.27824	1.88376e-05	0.000237408
Eef1b2	2682.78	-0.49906	0.116725	-4.2755	1.90706e-05	0.000240162
LOC500124	69.7394	0.98353	0.230122	4.27395	1.92037e-05	0.000241654
Tmem9	437.323	-0.679216	0.159009	-4.27155	1.94119e-05	0.000244089
Phc3	93.8248	0.962614	0.225426	4.2702	1.95299e-05	0.000245385
Mlh3	290.255	0.572339	0.134037	4.27001	1.95462e-05	0.000245404
Jarid2	281.32	0.73083	0.171209	4.26865	1.96662e-05	0.000246723
Tead2	142.501	-0.834935	0.195674	-4.26696	1.98153e-05	0.000248216
Pltp	1169.72	-0.459057	0.107582	-4.26706	1.98069e-05	0.000248216
Sec62	2271.36	0.457444	0.107217	4.26651	1.98551e-05	0.000248339
Inhbb	388.38	-2.15426	0.504917	-4.26656	1.98508e-05	0.000248339
Sri	675.111	-0.671665	0.157451	-4.26587	1.99121e-05	0.000248845
Ap4s1	208.346	-0.673673	0.157927	-4.26572	1.99257e-05	0.000248845
Erh	619.131	-0.56812	0.13319	-4.26549	1.99463e-05	0.000248914
G2e3	119.607	-0.801848	0.188023	-4.26462	2.00241e-05	0.000249698
Ubr3	574.335	0.679723	0.159408	4.26404	2.00764e-05	0.000250161
Ndufb6	554.49	-0.591868	0.138818	-4.26364	2.01126e-05	0.000250423
Pctp	1877.8	-0.702853	0.164922	-4.26174	2.02845e-05	0.000252374
AABR07035098.1	95.5926	0.872155	0.204658	4.26153	2.0303e-05	0.000252413
Ubfd1	302.451	0.532133	0.12488	4.26116	2.0337e-05	0.000252646
Ubxn8	266.977	0.663106	0.155624	4.26096	2.03554e-05	0.000252685
Pak6	18.0573	-2.5318	0.594235	-4.2606	2.03879e-05	0.000252899
Sctr	85.5481	-1.30438	0.306161	-4.26042	2.04039e-05	0.000252908
Scnn1a	60.1883	1.22087	0.286675	4.25873	2.05591e-05	0.00025464
Zmynd8	907.191	0.461385	0.108371	4.25744	2.06783e-05	0.000255734
Prss35	5.44609	-5.78909	1.35972	-4.25757	2.06663e-05	0.000255734
AABR07035539.1	234.175	-1.18167	0.277627	-4.25632	2.0782e-05	0.000256824
Bptf	503.427	0.680882	0.159988	4.25582	2.0828e-05	0.0002572
LOC685767	21.2453	4.74054	1.11464	4.25299	2.10933e-05	0.000260282
Espn	5.31396	-5.83766	1.37273	-4.25259	2.1131e-05	0.000260553
Smim26	175.448	-0.806246	0.18962	-4.2519	2.11963e-05	0.000261138
P3h4	41.3299	-1.40292	0.329962	-4.25176	2.121e-05	0.000261138
Araf	1612.09	0.495387	0.116548	4.25049	2.13304e-05	0.000262425
Tut4	805.721	0.788124	0.185976	4.23778	2.25739e-05	0.000277516
Etnppl	3919.34	1.17487	0.277259	4.23745	2.2607e-05	0.000277716
Ddx10	296.582	0.76621	0.180952	4.23432	2.29245e-05	0.000281366
Ccdc93	169.459	0.626196	0.147891	4.23419	2.29381e-05	0.000281366
Smim22	74.4261	-1.12749	0.266435	-4.23178	2.31847e-05	0.00028418
Hfe	661.707	-0.765823	0.181059	-4.22968	2.34028e-05	0.000286641
Atp5pf	1882.1	-0.42056	0.0994555	-4.22862	2.35127e-05	0.000287774
Spg11	637.103	0.53843	0.127348	4.22802	2.3576e-05	0.000288139
AABR07064980.1	73.5557	1.50048	0.35489	4.228	2.35774e-05	0.000288139
Mcu	252.672	0.629374	0.148869	4.22769	2.361e-05	0.000288325
Map1lc3b	2513.21	0.806633	0.190818	4.22724	2.36575e-05	0.000288692
Thnsl1	62.4261	1.25662	0.297325	4.22642	2.37437e-05	0.000289529
Nabp2	958.319	0.631116	0.149352	4.22569	2.3821e-05	0.000290258
Gja5	46.1587	-1.46922	0.347823	-4.22404	2.39966e-05	0.000292182
Mgam	750.515	0.791429	0.187388	4.22349	2.40553e-05	0.000292681
Mtcl1	14.089	-2.37395	0.562115	-4.22324	2.40819e-05	0.00029279
Tdrp	70.1867	-1.17194	0.27752	-4.2229	2.41179e-05	0.000293012
Wfs1	321.334	0.694148	0.16441	4.22206	2.4208e-05	0.000293891
Aadat	3272.25	0.773746	0.183285	4.22155	2.42627e-05	0.000294338
Mtx2	388.146	-0.604982	0.143349	-4.22034	2.43938e-05	0.000295496
Ccni	1665.32	-0.510134	0.120875	-4.22035	2.43924e-05	0.000295496
Cox7b	2039.5	-0.536057	0.127034	-4.21978	2.44544e-05	0.000296013
Slc16a4	480.747	0.706975	0.167573	4.21892	2.4548e-05	0.000296929
Dnajc10	779.374	-0.6053	0.14354	-4.21695	2.47632e-05	0.000299313
Clec2dl1	89.537	-1.38891	0.32938	-4.21673	2.4787e-05	0.000299382
Dnajc13	630.06	0.478775	0.113558	4.21614	2.48522e-05	0.00029995
Rreb1	865.981	0.585084	0.13879	4.21559	2.49125e-05	0.000300441
Alg3	505.463	0.667165	0.158267	4.21544	2.49293e-05	0.000300441
Slc16a3	33.7628	-1.61236	0.382668	-4.21348	2.51469e-05	0.000302843
Spon1	54.7436	-1.83144	0.434707	-4.21305	2.51945e-05	0.000303195
AC128792.2	45.5598	1.21303	0.288136	4.20991	2.55474e-05	0.000307219
Dap3	564.61	-0.461555	0.109662	-4.20887	2.56647e-05	0.000308405
Otud6b	233.451	0.628904	0.149445	4.20825	2.57356e-05	0.000309004
Srsf3	1734.16	-0.601284	0.142887	-4.20811	2.57519e-05	0.000309004
Cep164	213.579	0.609219	0.144801	4.20728	2.58468e-05	0.000309694
Mospd3	1559.83	0.591087	0.14049	4.20732	2.58418e-05	0.000309694
Igsf10	339.246	-0.791926	0.188253	-4.20672	2.59107e-05	0.00031001
Rgp1	155.04	0.659013	0.156654	4.2068	2.59012e-05	0.00031001
Hsph1	1100.45	0.91235	0.216891	4.20648	2.59377e-05	0.000310109
Dnajc25	326.329	0.699871	0.166447	4.20477	2.61348e-05	0.000312239
Dctn6	297.809	0.552713	0.131584	4.20045	2.66384e-05	0.000318026
Adamts8	19.0392	-2.57688	0.613627	-4.19942	2.676e-05	0.000318967
Mapk6	1321.17	0.397905	0.0947552	4.19929	2.67751e-05	0.000318967
Psmd1	2268.39	0.461621	0.109924	4.19947	2.67542e-05	0.000318967
Itgb6	57.6096	-1.99336	0.474717	-4.19905	2.68043e-05	0.000319085
Hnrnpul2	1115.57	0.495886	0.11816	4.19675	2.70778e-05	0.00032205
Smap1	677.576	0.428201	0.102035	4.19662	2.70923e-05	0.00032205
Oard1	351.701	-0.522578	0.12453	-4.19642	2.71168e-05	0.000322067
Mrpl12	1532.09	-0.653151	0.15565	-4.19629	2.71327e-05	0.000322067
RGD1307100	1526.03	0.648876	0.154649	4.19581	2.71899e-05	0.000322514
Atraid	569.613	-0.530426	0.126461	-4.19438	2.73614e-05	0.000324114
Ybx1-ps3	99.2982	-1.4066	0.335355	-4.19436	2.7364e-05	0.000324114
RT1-T24-3	159.485	0.854776	0.20383	4.19356	2.74609e-05	0.000325029
Dele1	2483.48	0.422048	0.100659	4.19286	2.75457e-05	0.000325799
Vhl	236.784	-0.589814	0.140681	-4.19257	2.75817e-05	0.000325993
Arpc2	3845.06	0.528244	0.126079	4.18978	2.7922e-05	0.000329779
Tspan11	21.1841	-4.75235	1.13436	-4.18947	2.79609e-05	0.00032982
Klrc2	17.5883	-1.94466	0.464201	-4.18927	2.79854e-05	0.00032982
Ripk1	629.764	-0.366584	0.087503	-4.18938	2.79713e-05	0.00032982
Csnk1g3	227.574	0.582812	0.139237	4.18575	2.84223e-05	0.000334493
Nfatc3	568.291	0.429418	0.102587	4.1859	2.84035e-05	0.000334493
Psmb9	686.888	-0.77244	0.18458	-4.18486	2.85346e-05	0.000335575
Prdx2	1751.45	-0.421	0.100606	-4.18464	2.85614e-05	0.000335652
Sh3bp4	239.863	-0.82475	0.197129	-4.18381	2.86662e-05	0.000336644
F11r	2938.96	-0.350561	0.0838121	-4.1827	2.8807e-05	0.000338058
Yap1	263.372	0.695233	0.166234	4.18224	2.88645e-05	0.000338492
Taf12	338.238	0.598087	0.143057	4.18075	2.90554e-05	0.000340489
Sorbs1	262.562	0.78888	0.188711	4.18036	2.91044e-05	0.000340822
Ptma	3076.66	-0.472767	0.113131	-4.17892	2.92893e-05	0.000342745
Aox4	9.62254	-2.63565	0.630926	-4.17743	2.94826e-05	0.000344763
Slc34a2	1678.1	-0.839288	0.20097	-4.17619	2.96426e-05	0.000346389
Cpeb2	140.182	1.32245	0.316805	4.17433	2.98865e-05	0.000348992
Vim	1866.58	-0.892871	0.213915	-4.17396	2.9935e-05	0.000349312
Dph3	318.482	-0.583405	0.139838	-4.17201	3.01922e-05	0.000352064
Pkia	36.9322	-1.54553	0.370559	-4.17081	3.03514e-05	0.000353672
Mllt10	363.869	0.824873	0.197979	4.16647	3.09355e-05	0.000359971
Btg3	84.033	-1.11459	0.267512	-4.16651	3.09296e-05	0.000359971
Kcnq1	31.9017	-1.54741	0.371432	-4.16605	3.0992e-05	0.000360375
Igf2bp2	126.782	1.31787	0.316442	4.16466	3.11814e-05	0.000362322
LOC100912618	646.156	0.861856	0.207036	4.16283	3.14332e-05	0.000364992
Pdk3	57.0412	-1.17268	0.28173	-4.16241	3.14907e-05	0.000365403
Mpped1	19.7462	7.49037	1.79976	4.16187	3.1565e-05	0.000366008
Sox5	142.088	0.924146	0.222275	4.15767	3.21516e-05	0.000372548
Aplnr	39.3823	-2.37837	0.572131	-4.15703	3.22412e-05	0.000373325
Wasf3	13.9643	2.15566	0.518614	4.15659	3.23038e-05	0.000373788
Proser2	537.98	0.889205	0.213983	4.15549	3.24595e-05	0.000375327
Gmps	606.259	0.483854	0.116489	4.15363	3.27237e-05	0.000378118
Ddhd1	884.226	-0.881726	0.212426	-4.15075	3.31383e-05	0.000382641
Clpb	520.83	0.473283	0.114029	4.15055	3.31671e-05	0.000382706
Sez6	985.789	1.7495	0.421635	4.14932	3.33461e-05	0.000384503
Rab10	1417.3	0.493069	0.118845	4.14883	3.34178e-05	0.000385061
Ubn2	135.97	0.775946	0.187038	4.1486	3.34519e-05	0.000385186
Dnaja1	4083.03	0.517574	0.124846	4.14571	3.38761e-05	0.000389799
Acer3	389.119	-0.550994	0.132927	-4.14509	3.39686e-05	0.000390592
Gcnt1	94.7961	-1.07211	0.258685	-4.14444	3.40641e-05	0.000391417
Crispld2	67.5067	-1.35009	0.325808	-4.14381	3.41589e-05	0.000392235
Has3	13.4176	-2.4223	0.584953	-4.14102	3.45768e-05	0.000396757
Rin3	723.494	0.603815	0.145826	4.14067	3.46297e-05	0.000397089
Dnaja2	1188.2	-0.381384	0.0921111	-4.14048	3.46574e-05	0.000397131
Egfl7	541.354	-0.665931	0.160892	-4.139	3.48822e-05	0.00039943
Rom1	28.6569	-1.39613	0.337346	-4.13856	3.49489e-05	0.000399917
LOC102549948	8.1514	-3.80623	0.919806	-4.13808	3.50221e-05	0.000400478
Serpinb6a	296.178	-0.791482	0.191367	-4.13594	3.53501e-05	0.000403949
Usp20	250.853	-0.822285	0.198848	-4.13525	3.54565e-05	0.000404884
Slc3a2	1595.96	0.741374	0.179295	4.13493	3.55062e-05	0.000404893
Cfdp1	848.159	0.461898	0.111704	4.13502	3.54922e-05	0.000404893
Zfp444	440.506	0.438131	0.105997	4.13343	3.57387e-05	0.000407263
Pard6b	118.523	-0.870615	0.210907	-4.12795	3.66013e-05	0.000416806
Mapk11	76.4604	-1.03641	0.25109	-4.12766	3.66477e-05	0.000417047
Evc2	23.5851	-2.11294	0.51207	-4.12627	3.68691e-05	0.00041899
Saysd1	132.858	-0.707774	0.171524	-4.12638	3.68521e-05	0.00041899
Sall1	2010.03	0.7339	0.177877	4.12589	3.69301e-05	0.000419395
Lcn2	2785.2	-2.85346	0.691643	-4.12563	3.69719e-05	0.000419581
LOC102551356	10.6288	-5.30471	1.28595	-4.12512	3.7054e-05	0.000420225
Rnpep	423.206	-0.435585	0.105631	-4.12365	3.72912e-05	0.000422625
AC113771.1	95.3301	-1.04746	0.254129	-4.12175	3.76e-05	0.000425833
Lrp6	779.796	0.745814	0.18096	4.12143	3.7652e-05	0.000425963
Hyls1	76.371	-1.29042	0.313105	-4.12137	3.7663e-05	0.000425963
Cthrc1	28.5961	-2.3945	0.581168	-4.12015	3.78627e-05	0.000427929
Rhbdf2	212.654	-0.788933	0.191491	-4.11994	3.78967e-05	0.000428021
Gipc1	707.87	-0.583666	0.141774	-4.11688	3.84038e-05	0.000433452
Mrpl57	450.164	0.539055	0.131025	4.11415	3.88609e-05	0.000438312
Tbx4	10.6143	-3.17227	0.771283	-4.11298	3.90586e-05	0.000440242
Cyb5r3	6193.56	0.641108	0.155886	4.11266	3.9112e-05	0.000440543
Nedd8	1185.1	-0.442674	0.107672	-4.11132	3.93398e-05	0.000442808
Ywhaz	1877.32	-0.480926	0.116987	-4.11093	3.94073e-05	0.000443265
Smo	183.795	-0.820603	0.19971	-4.10897	3.97436e-05	0.000446137
Ephx2	976.778	2.64695	0.644158	4.10917	3.97085e-05	0.000446137
Rasa4	78.1069	-1.14276	0.278105	-4.10911	3.97193e-05	0.000446137
Ccdc8	42.9389	-1.74489	0.424692	-4.1086	3.98061e-05	0.000446536
Col4a6	19.8719	-2.67624	0.651481	-4.10793	3.99223e-05	0.000447536
Cadm4	51.0398	1.18212	0.287839	4.10689	4.01026e-05	0.000449253
Pofut1	505.011	0.558612	0.136034	4.10641	4.01863e-05	0.000449885
Rfc2	284.548	-0.913793	0.222596	-4.10517	4.04022e-05	0.000451996
Thy1	57.1901	-1.28453	0.312971	-4.1043	4.05539e-05	0.000453387
Dkk2	85.2442	-1.22602	0.298774	-4.1035	4.06939e-05	0.000454644
Gpx7	187.264	-1.0273	0.250368	-4.10314	4.07582e-05	0.000455055
Acaca	1054.4	0.961848	0.234495	4.10179	4.09975e-05	0.000457418
Cecr2	157.989	0.778312	0.189941	4.09764	4.17382e-05	0.000465363
Slfn2	300.963	-0.597542	0.145831	-4.09749	4.17658e-05	0.000465363
Ampd2	748.122	0.556933	0.135947	4.09669	4.19102e-05	0.000466656
Pnkd	4183.57	0.743657	0.18154	4.09638	4.19666e-05	0.00046697
Gfra2	21.9791	-3.00115	0.732928	-4.09474	4.22642e-05	0.000469874
Dnah8	10.9257	2.63961	0.644651	4.09463	4.22844e-05	0.000469874
Mapk14	2418.76	-0.439777	0.107424	-4.09386	4.24253e-05	0.000471123
Gpx2	136.304	-2.09084	0.510785	-4.09338	4.25121e-05	0.000471771
Mall	9.26697	-3.27623	0.800436	-4.09306	4.25709e-05	0.000472106
Cpe	43.2086	-2.05254	0.501528	-4.09257	4.26616e-05	0.000472795
Adam8	41.8654	-1.65108	0.403569	-4.0912	4.29152e-05	0.000475087
LOC100359687	76.4946	-1.2626	0.308617	-4.09114	4.29259e-05	0.000475087
Pmpca	1218.46	0.388357	0.0949302	4.09097	4.29567e-05	0.00047511
AABR07053716.1	21.8349	-1.79161	0.438068	-4.08981	4.31724e-05	0.000476903
Slc6a8	217.989	-0.736984	0.180201	-4.08979	4.31765e-05	0.000476903
Sqstm1	6341.04	0.60917	0.148956	4.0896	4.32113e-05	0.000476968
Adcy2	18.8967	-3.02753	0.740344	-4.08935	4.32581e-05	0.000477166
Paqr4	46.2209	-1.43531	0.35107	-4.08838	4.344e-05	0.000478853
Usp9x	1676.06	0.431344	0.105538	4.08708	4.3684e-05	0.000480893
LOC500684	13.376	2.29688	0.562007	4.08693	4.37122e-05	0.000480893
AABR07031491.2	323.31	0.720916	0.176393	4.08699	4.37002e-05	0.000480893
Vamp5	92.327	-0.815684	0.199687	-4.08482	4.41112e-05	0.000484637
Dnaaf5	257.607	0.549868	0.134612	4.08484	4.41073e-05	0.000484637
Plekha2	216.117	-0.576227	0.141077	-4.08449	4.41737e-05	0.000485001
Slc39a5	994.188	-0.740669	0.181373	-4.08367	4.43294e-05	0.000486388
Igsf6	140.239	-0.788456	0.193105	-4.08303	4.44519e-05	0.000487408
Pdpk1	143.364	0.849205	0.208015	4.08242	4.45686e-05	0.000488365
Rtn2	52.352	-2.39188	0.585946	-4.08208	4.46336e-05	0.000488753
Vps4a	875.805	0.344271	0.0843453	4.08169	4.47099e-05	0.000489265
Ssr2	1534.86	-0.61489	0.150694	-4.08038	4.49629e-05	0.000491707
LOC100362366	43.5424	-1.33995	0.328552	-4.07834	4.53575e-05	0.000495695
Syncrip	476.827	0.533024	0.130704	4.0781	4.5406e-05	0.000495897
Neurl3	128.368	-1.24764	0.305959	-4.07779	4.54665e-05	0.00049623
Shc2	36.9206	-1.46417	0.359201	-4.07619	4.57791e-05	0.000499312
Bdp1	163.433	0.709286	0.174076	4.07458	4.60975e-05	0.000502454
Prmt1	270.834	-0.624282	0.153225	-4.07428	4.61561e-05	0.000502761
Upb1	9810.78	0.525857	0.129107	4.07304	4.64034e-05	0.000505122
Emc3	1184.45	-0.388683	0.0954606	-4.07166	4.66802e-05	0.000507801
Qsox1	3711.03	-0.84914	0.208571	-4.07122	4.67666e-05	0.000508406
AABR07062583.1	322.92	0.7985	0.196149	4.07089	4.68336e-05	0.000508466
AABR07044509.1	268.559	-1.25209	0.307562	-4.07102	4.68076e-05	0.000508466
Washc2c	1474.9	0.421484	0.103551	4.07032	4.69484e-05	0.000509044
Sema4c	109.321	-0.710589	0.174577	-4.07036	4.69414e-05	0.000509044
Fgfr2	1663.1	0.632743	0.15547	4.06988	4.7037e-05	0.000509671
Zfyve27	357.475	-0.487522	0.11991	-4.06571	4.78856e-05	0.000518526
Far1	70.7601	-1.10167	0.271203	-4.06214	4.86255e-05	0.000526193
Cpxm1	67.4412	-1.4629	0.360257	-4.06072	4.89225e-05	0.00052906
Tap2	75.9226	-1.01189	0.249205	-4.06046	4.89756e-05	0.000529288
RGD1559600	431.639	0.8914	0.219542	4.06026	4.90173e-05	0.000529394
Bmf	584.184	-0.91355	0.225045	-4.05942	4.91958e-05	0.000530974
Maco1	770.696	0.418098	0.103006	4.05897	4.92905e-05	0.000531649
Eif4ebp2	1448.69	0.566624	0.139634	4.05791	4.9514e-05	0.000533711
Aff1	242.057	0.770083	0.189782	4.05773	4.95516e-05	0.000533769
Cd34	57.4794	-1.41826	0.349707	-4.05556	5.00143e-05	0.000538402
LOC299312	86.0031	0.823641	0.203117	4.055	5.01333e-05	0.000538999
Atp6v0d1	2221.56	0.308972	0.0761953	4.055	5.01349e-05	0.000538999
Rexo4	976.787	0.285162	0.0703474	4.05363	5.04297e-05	0.000540411
Ganc	273.333	0.558192	0.137687	4.05407	5.03342e-05	0.000540411
AABR07065420.1	39.36	1.26646	0.312417	4.05376	5.04004e-05	0.000540411
AABR07069878.1	4155.07	3.23366	0.797699	4.05374	5.04057e-05	0.000540411
Itm2c	1310.05	-0.475865	0.117391	-4.05367	5.04214e-05	0.000540411
Mt-co3	322738	0.672672	0.165975	4.05286	5.05953e-05	0.000541835
Atp6v1h	471.342	-0.570807	0.140892	-4.05138	5.09167e-05	0.000544908
Srp54a	851.104	0.490167	0.120992	4.05123	5.09481e-05	0.000544908
Tnfsf12	288.014	0.646944	0.159715	4.05061	5.10846e-05	0.000546014
Pccb	3226.31	0.373826	0.0923047	4.04992	5.12361e-05	0.000546696
Mad2l1bp	243.567	-0.621872	0.153552	-4.04991	5.12369e-05	0.000546696
Litaf	2584.94	0.347056	0.0856956	4.04986	5.12476e-05	0.000546696
Nt5dc1	329.417	0.591446	0.146062	4.04927	5.13769e-05	0.000547722
Plp2	163.338	-0.753665	0.186187	-4.04789	5.16809e-05	0.000550608
Lsm14b	237.438	0.595455	0.14712	4.04741	5.17882e-05	0.000551396
AABR07030544.1	198.624	0.716731	0.177133	4.04628	5.20386e-05	0.000553705
Smarca2	494.555	0.676127	0.167126	4.04561	5.21863e-05	0.000554454
Lclat1	333.452	0.566383	0.140003	4.04551	5.22096e-05	0.000554454
Ptgr2	734.094	0.401859	0.0993291	4.04573	5.21605e-05	0.000554454
Ccdc175	38.4388	-1.54783	0.382643	-4.04509	5.23031e-05	0.000555091
Rbm4	258.965	0.504171	0.124665	4.0442	5.25028e-05	0.000556853
C1qtnf2	81.7357	-1.15701	0.286166	-4.04315	5.27388e-05	0.000558998
Pparg	27.093	1.70227	0.421063	4.04279	5.28192e-05	0.000559492
Tmem87b	242.293	-0.612018	0.151442	-4.04128	5.316e-05	0.00056274
LOC691143	237.28	-0.58835	0.145689	-4.03838	5.38213e-05	0.000569376
Golgb1	1323.95	0.43964	0.108879	4.03788	5.39363e-05	0.000570228
Gpx8	85.0859	-1.01772	0.252108	-4.03683	5.41787e-05	0.000572425
Rnf146	214.819	-0.671881	0.166554	-4.03401	5.48338e-05	0.000578607
Prap1	3.60951	-6.4906	1.60892	-4.03413	5.48055e-05	0.000578607
Ppara	424.844	1.02325	0.25369	4.03344	5.49655e-05	0.000579627
Itfg2	160.315	-0.756913	0.187702	-4.03252	5.5181e-05	0.000581529
Ccdc91	405.755	0.580642	0.144012	4.03189	5.53293e-05	0.000582719
Gsn	410.854	-1.36191	0.337884	-4.03069	5.56128e-05	0.000585333
Dhrsx	504.908	-0.622048	0.154383	-4.02924	5.59564e-05	0.000588574
Ino80d	37.4044	1.41159	0.350363	4.02895	5.60271e-05	0.000588943
Chmp1a	762.026	-0.576292	0.143052	-4.02855	5.61228e-05	0.000589575
Ypel5	905.968	-0.550515	0.136734	-4.02619	5.66891e-05	0.000595145
Tle4	150.452	-0.738727	0.183563	-4.02437	5.7128e-05	0.000599373
Cth	11058.2	0.935829	0.232597	4.02339	5.73667e-05	0.000601495
Smurf2	894.902	0.454775	0.113073	4.02195	5.77177e-05	0.000604792
Arhgdib	691.755	-0.507808	0.126264	-4.0218	5.77546e-05	0.000604796
Sybu	69.139	1.23159	0.306315	4.02066	5.80355e-05	0.000607352
Aqp7	146.765	-1.1103	0.276276	-4.01882	5.84909e-05	0.000611345
Lrrc75b	161.512	-1.02029	0.25387	-4.01896	5.84545e-05	0.000611345
Reep5	1461.19	-0.637817	0.158714	-4.01867	5.85281e-05	0.000611346
Mtm1	342.914	0.514367	0.128031	4.01751	5.88161e-05	0.000613968
Pdxk	128.135	-0.966413	0.240568	-4.01721	5.88904e-05	0.000614355
Grik5	112.356	-0.969885	0.241581	-4.01474	5.95126e-05	0.000620201
Rnf139	728.85	0.521924	0.130004	4.01468	5.95258e-05	0.000620201
Gem	33.2307	-1.78687	0.445307	-4.01267	6.00359e-05	0.000625122
Sept9	875.822	0.522823	0.130388	4.00976	6.07808e-05	0.00063248
Invs	53.0465	0.923667	0.230488	4.00745	6.13783e-05	0.000638296
Afg3l1	933.878	0.433567	0.108196	4.00726	6.14279e-05	0.000638411
Phf21a	244.039	0.689564	0.172106	4.00662	6.15935e-05	0.000639729
Acat1	6124	0.567106	0.141549	4.00643	6.16432e-05	0.000639843
AABR07008608.1	86.8753	0.981681	0.245037	4.00625	6.16896e-05	0.000639923
Gcnt3	25.1072	-3.35573	0.837688	-4.00595	6.17697e-05	0.000640353
Slc46a1	557.839	0.652331	0.162851	4.00568	6.18381e-05	0.000640465
Bag6	2058.43	0.427157	0.10664	4.00561	6.1858e-05	0.000640465
Tex2	1780.79	0.607522	0.151692	4.00497	6.20247e-05	0.000641789
Vgll4	154.466	-0.81673	0.203953	-4.00449	6.21503e-05	0.000642686
Mir293	5.38032	4.10653	1.02568	4.00372	6.23542e-05	0.00064399
Acadvl	6650.8	0.465818	0.116345	4.00378	6.23396e-05	0.00064399
P2rx4	879.249	0.620586	0.155035	4.00289	6.25747e-05	0.000645863
Edf1	1967.81	0.608375	0.152005	4.00233	6.27218e-05	0.000646977
Susd1	85.3192	0.79689	0.199197	4.00051	6.32056e-05	0.000651561
Prmt5	449.225	0.602782	0.150716	3.99944	6.34915e-05	0.000654101
Mtss1	2320.49	0.704357	0.176142	3.9988	6.36654e-05	0.000655484
Fahd1	1050.1	0.529268	0.132486	3.9949	6.47217e-05	0.000665945
Sharpin	459.334	0.448366	0.112287	3.99304	6.52305e-05	0.000670762
Fam222b	753.816	0.662005	0.165942	3.98937	6.62481e-05	0.000680803
RT1-T24-1	47.7048	2.1308	0.53438	3.98742	6.67969e-05	0.000686016
Ankrd52	811.732	0.45248	0.113486	3.98709	6.68876e-05	0.000686521
Med25	1080.14	0.659631	0.16548	3.98616	6.71502e-05	0.00068879
Ppargc1a	115.89	1.66937	0.419019	3.98398	6.77694e-05	0.00069471
Thbs4	81.3148	-2.48786	0.624631	-3.98292	6.80738e-05	0.000697183
Mapk10	11.7435	-3.57435	0.897435	-3.98285	6.8095e-05	0.000697183
Mocs2	1436.78	-0.738583	0.185498	-3.98161	6.84486e-05	0.00070037
Gnl2	681.339	0.513505	0.128975	3.98144	6.84984e-05	0.000700446
Myo1f	193.096	-0.743606	0.186777	-3.98124	6.85561e-05	0.000700603
Atg2b	841.785	0.518731	0.13032	3.98045	6.87836e-05	0.000702494
Mesd	792.343	-0.339077	0.0852037	-3.97961	6.90298e-05	0.000704573
Lars	982.947	0.538379	0.135296	3.97926	6.9129e-05	0.00070515
Tmem14c	2023.31	-0.482384	0.121286	-3.97726	6.97135e-05	0.000710674
AABR07026058.1	157.81	-0.864712	0.217472	-3.9762	7.00258e-05	0.000712978
Ccl25	7.82129	-3.59632	0.904447	-3.97626	7.00072e-05	0.000712978
Fam118b	180.917	-0.787946	0.19826	-3.97431	7.05849e-05	0.000717787
Mrpl28	521.383	-0.565021	0.142167	-3.97434	7.05761e-05	0.000717787
Myof	200.8	-0.915976	0.230504	-3.9738	7.07336e-05	0.000718857
Map4	2005.49	0.418767	0.105413	3.97263	7.10839e-05	0.000721973
Zrsr2	161.743	0.722592	0.181921	3.972	7.12719e-05	0.000723439
LOC103689965	4390.9	-0.650618	0.163897	-3.96969	7.19669e-05	0.000730045
Isx	5.34807	-5.8442	1.47264	-3.96853	7.23174e-05	0.00073315
Cpz	212.352	-0.923797	0.232807	-3.96808	7.24543e-05	0.00073319
Rab8a	1616.16	0.43007	0.108381	3.96813	7.24388e-05	0.00073319
Nelfe	753.023	0.581791	0.146608	3.96835	7.23733e-05	0.00073319
Mta1	1199.68	0.436725	0.110069	3.96775	7.25536e-05	0.000733745
Zmym4	340.912	-0.558359	0.140747	-3.96712	7.27476e-05	0.000735258
AC128962.1	62.9438	-1.53169	0.386211	-3.96594	7.31068e-05	0.000738437
Ptpn13	292.528	-0.885048	0.223227	-3.96479	7.34612e-05	0.000741563
Igfbp5	391.295	-2.11372	0.533206	-3.96417	7.36507e-05	0.000742676
LOC100362432	1612.13	0.547634	0.138147	3.96414	7.36612e-05	0.000742676
Arl1	797.788	0.527557	0.133094	3.9638	7.37657e-05	0.000742823
Samm50	1144.07	-0.401094	0.101187	-3.96388	7.37399e-05	0.000742823
Gsr	1203.68	0.418188	0.105515	3.96331	7.39185e-05	0.000743456
Mex3c	204.243	-0.669719	0.168979	-3.96332	7.39159e-05	0.000743456
AABR07061950.1	4540.43	0.539707	0.136236	3.96155	7.44647e-05	0.000748494
Rbpjl	23.3921	-2.05643	0.519168	-3.96102	7.46318e-05	0.000749264
Grina	4100.08	0.393487	0.0993373	3.96112	7.45997e-05	0.000749264
Stip1	1506.89	0.647873	0.16363	3.95938	7.5145e-05	0.000753957
Ctnnd1	2520.45	0.386815	0.0977542	3.95702	7.58904e-05	0.000759745
Ncaph	117.89	-1.14287	0.288807	-3.95722	7.58281e-05	0.000759745
Sdcbp	1080.49	-0.667526	0.16869	-3.9571	7.58638e-05	0.000759745
Abhd14b	5318.7	0.439501	0.11107	3.95697	7.59056e-05	0.000759745
Lman1	1185.28	0.686237	0.173446	3.95649	7.60585e-05	0.000760815
Gjb1	15753.9	0.452412	0.114383	3.95525	7.6454e-05	0.000764309
Enpp2	1525.87	0.710467	0.179651	3.95471	7.66283e-05	0.000765589
Kmt2a	306.232	0.742609	0.187804	3.95417	7.67996e-05	0.000766836
Pdap1	1826.51	0.455935	0.115364	3.95214	7.74538e-05	0.000772902
AC117869.1	218.098	-0.71246	0.180321	-3.95107	7.78036e-05	0.000775924
Eps8l1	13.8085	-2.40313	0.608364	-3.95015	7.81032e-05	0.000778443
LOC108348062	80.3758	1.30882	0.331373	3.94971	7.82469e-05	0.000779405
C2cd2l	819.098	0.520139	0.131746	3.94805	7.87895e-05	0.000784338
Triqk	19.5035	-2.61965	0.663844	-3.94618	7.94071e-05	0.00079001
Psat1	488.285	1.68427	0.426936	3.94501	7.97957e-05	0.000793063
Mapk1	554.278	0.492453	0.124835	3.94483	7.98579e-05	0.000793063
Hip1	515.852	-0.416425	0.10556	-3.94489	7.98363e-05	0.000793063
Hdgf	1485.71	0.36713	0.0930725	3.94456	7.99474e-05	0.000793457
Hist1h4m	458.113	0.853441	0.216367	3.94442	7.99935e-05	0.000793457
Ftl1	16205.4	0.718934	0.182337	3.94288	8.0509e-05	0.000798091
Nsrp1	384.426	0.724763	0.183851	3.94212	8.0763e-05	0.00080013
Simc1	215.707	0.797408	0.20235	3.94074	8.12299e-05	0.000804273
Anapc1	462.373	0.419612	0.106501	3.93997	8.14928e-05	0.000806394
Dnajb12	1474.67	0.404138	0.102605	3.93876	8.19034e-05	0.000809971
C17h6orf52	40.3612	1.49109	0.378599	3.93845	8.20084e-05	0.000810525
Slc12a7	1129.09	-0.458146	0.11635	-3.93765	8.22819e-05	0.000812743
Slk	418.067	0.707921	0.179801	3.93725	8.242e-05	0.00081362
Nufip1	232.156	0.58216	0.14791	3.93591	8.2882e-05	0.000817694
L3mbtl3	179.605	0.709147	0.180222	3.93484	8.32509e-05	0.000820843
Ddah2	68.2785	-1.01004	0.256783	-3.93345	8.37354e-05	0.000825128
Dnajb6	531.68	0.420898	0.107017	3.93299	8.3896e-05	0.000826218
Atp8a1	62.01	1.22029	0.310359	3.93188	8.42839e-05	0.000829545
Wdtc1	1357.31	0.437396	0.111252	3.93159	8.43841e-05	0.000830037
Spg7	584.752	0.506207	0.128783	3.93068	8.47043e-05	0.000832691
Tacc3	374.606	-0.821	0.208912	-3.92988	8.49874e-05	0.000834977
Tmem69	285.973	0.607347	0.154586	3.92886	8.53483e-05	0.000838025
Ubxn1	2299.92	0.528546	0.134621	3.92616	8.63111e-05	0.000846471
AABR07065438.1	414.627	-0.521674	0.132876	-3.92602	8.63621e-05	0.000846471
Cep76	65.9647	0.982798	0.250323	3.92611	8.63292e-05	0.000846471
Tmem159	190.775	-0.891333	0.227044	-3.92582	8.64357e-05	0.000846691
Dpp7	550.515	-0.487555	0.124233	-3.92452	8.69046e-05	0.00085078
Hnrnpul1	1925.31	0.348254	0.0887646	3.92334	8.73305e-05	0.000854444
Tet3	121.246	0.850971	0.216914	3.92309	8.74216e-05	0.000854829
AABR07052458.1	27.9315	1.93101	0.492261	3.92273	8.75507e-05	0.000855585
LOC100361636	43.3682	1.32727	0.338506	3.92096	8.81969e-05	0.000860883
AABR07018244.2	39.739	-1.64079	0.418463	-3.921	8.81841e-05	0.000860883
Plcd1	124.571	-0.734469	0.187416	-3.91892	8.89482e-05	0.000867704
Schip1	39.3313	-1.33939	0.342038	-3.91592	9.00615e-05	0.000878046
Anks6	36.6194	-1.4556	0.371788	-3.91512	9.03599e-05	0.000880436
Enpp4	287.765	-0.716935	0.183166	-3.91412	9.07349e-05	0.00088305
Mib1	167.364	0.883382	0.225688	3.91417	9.07151e-05	0.00088305
Ctbp2	136.31	-0.674959	0.172451	-3.91392	9.08111e-05	0.000883272
Erich5	34.3935	-1.74478	0.445972	-3.9123	9.14196e-05	0.000888668
Jpt1	337.037	-0.549299	0.140416	-3.91195	9.15555e-05	0.000889465
Arhgef28	35.3186	-2.06529	0.52805	-3.91115	9.18568e-05	0.000891868
Mob3b	115.06	0.866324	0.221625	3.90896	9.26933e-05	0.000899462
Nup62	2534.39	1.03489	0.264772	3.9086	9.28329e-05	0.000900288
Car8	851.231	-0.457804	0.117176	-3.90696	9.34631e-05	0.000905869
RGD1309730	319.566	0.619574	0.158589	3.9068	9.35277e-05	0.000905964
Stil	59.3765	-1.22991	0.314885	-3.90589	9.38803e-05	0.000908847
Cpne7	135.451	-0.979503	0.250804	-3.90545	9.40519e-05	0.000909975
Ergic3	2368.6	0.409113	0.104823	3.9029	9.50469e-05	0.000917991
Agrn	1403	-0.578082	0.148107	-3.90314	9.49512e-05	0.000917991
Mmd2	73.8195	-3.97828	1.0193	-3.90296	9.5024e-05	0.000917991
Reg3g	5.13761	-5.75201	1.47431	-3.90148	9.56054e-05	0.000922846
Dock1	462.341	0.464107	0.119001	3.90004	9.61762e-05	0.000927814
Tbc1d8	483.775	-0.505705	0.129758	-3.89728	9.72796e-05	0.000937911
Mlf2	3495.76	0.358263	0.0919308	3.8971	9.73525e-05	0.000938067
Nudt9	702.707	0.496251	0.127346	3.89686	9.74476e-05	0.000938437
Kit	107.513	1.09551	0.281151	3.89651	9.75896e-05	0.000939257
B4galt1	390.965	-0.610433	0.156674	-3.89619	9.77166e-05	0.000939933
AABR07032520.1	377.771	0.54544	0.140009	3.89576	9.78895e-05	0.000941049
RGD1560341	106.667	0.847261	0.217581	3.89401	9.86011e-05	0.000947339
Pyroxd1	224.471	0.73029	0.187575	3.89332	9.88819e-05	0.000949484
Heyl	266.242	-0.854539	0.219596	-3.89141	9.96642e-05	0.000956441
Osbpl8	153.737	0.834558	0.214487	3.89096	9.98503e-05	0.000957671
Acvrl1	221.486	-0.610729	0.156974	-3.89063	9.99833e-05	0.000958289
Gsk3b	191.693	0.726251	0.186672	3.89052	0.000100031	0.000958289
RGD1304728	150.875	0.819769	0.210794	3.88896	0.000100673	0.000963882
Osbpl5	117.779	-0.902014	0.231967	-3.88854	0.000100849	0.000964663
LOC108348142	333.361	-0.727525	0.187098	-3.88848	0.000100873	0.000964663
Abca1	2729.2	0.49799	0.128075	3.88828	0.000100959	0.000964663
Adgrf5	1294.23	0.691327	0.177801	3.88821	0.000100988	0.000964663
Zfp110	794.658	0.393193	0.101136	3.88775	0.000101178	0.000965922
Brd7	1183.63	0.422265	0.108656	3.88625	0.000101804	0.00097134
Acbd5	340.857	0.61472	0.158186	3.88606	0.000101884	0.000971539
Nop2	428.272	0.687869	0.177049	3.88519	0.00010225	0.000974467
Igdcc4	26.7056	-1.94899	0.501737	-3.8845	0.000102542	0.000976686
Alpi	10.2191	-8.11669	2.09016	-3.88328	0.000103057	0.000981027
Gtf2h1	548.685	0.432606	0.111418	3.88273	0.00010329	0.000982678
Ubp1	565.495	0.424375	0.109305	3.88247	0.0001034	0.000983165
Snx11	479.555	-0.632657	0.162975	-3.88192	0.000103633	0.000984814
B4galt6	211.614	-0.914485	0.235616	-3.88124	0.000103923	0.000987003
Pitpna	1279.95	0.516304	0.133053	3.88045	0.000104263	0.000989656
Plek2	105.25	-0.799403	0.206035	-3.87994	0.000104483	0.000991179
Ethe1	1761.48	1.03951	0.267966	3.87926	0.000104774	0.000993267
Dmxl2	291.094	0.54704	0.141021	3.87915	0.000104823	0.000993267
Mif4gd	520.448	-0.678194	0.17484	-3.87894	0.000104914	0.000993557
Sel1l	3605.85	0.408484	0.10534	3.87775	0.000105426	0.000997833
Lactb	1315.38	0.589453	0.152058	3.87649	0.000105973	0.00100244
Atg3	854.72	0.479951	0.123831	3.87587	0.000106246	0.00100445
Cand2	61.8051	-1.29262	0.333682	-3.8738	0.000107149	0.00101241
Elac2	744.435	0.484047	0.124964	3.87349	0.000107287	0.00101313
Fat1	1084.64	0.539753	0.139354	3.87324	0.000107396	0.00101338
Cldn15	51.5699	-1.41794	0.366095	-3.87315	0.000107436	0.00101338
Slc6a9	756.892	1.13609	0.293372	3.87252	0.000107716	0.00101486
Narfl	443.489	-0.458272	0.118339	-3.87252	0.000107714	0.00101486
Gba	411.943	0.436847	0.112819	3.87209	0.000107905	0.00101558
AABR07030366.1	7.96839	-5.05735	1.30611	-3.87207	0.000107915	0.00101558
AC114111.1	32.1893	1.4623	0.377687	3.87172	0.000108072	0.00101647
Lpar3	26.801	2.40174	0.620365	3.8715	0.000108167	0.00101679
Blzf1	152.706	0.621357	0.16051	3.87115	0.000108324	0.00101769
Mir291a	8.98335	3.0322	0.783464	3.87025	0.000108724	0.00102087
Yipf2	385.55	0.479705	0.123968	3.86959	0.00010902	0.00102307
Cacna1g	69.7244	-1.06733	0.275919	-3.86827	0.000109611	0.00102804
Dsn1	138.845	-1.14106	0.295095	-3.86675	0.000110297	0.00103388
F9	10940.9	0.498728	0.129044	3.8648	0.000111179	0.00104097
Wdr6	472.241	-0.666309	0.172402	-3.86486	0.000111155	0.00104097
Acsl1	35893.3	0.62918	0.162804	3.86466	0.000111245	0.001041
Tmem98	981.01	-0.668949	0.173102	-3.86447	0.00011133	0.0010412
LOC100134871	2972.09	-1.29118	0.334264	-3.86277	0.00011211	0.00104787
Pdpn	40.8172	-1.65598	0.428718	-3.86264	0.00011217	0.00104787
Timm8a1	260.954	-0.876508	0.227002	-3.86124	0.000112813	0.00105328
Hpd	55013.5	0.974617	0.252475	3.86025	0.000113271	0.00105696
Frmd4b	762.249	0.57421	0.148758	3.86004	0.00011337	0.00105729
Thbs2	333.55	-0.763903	0.197913	-3.85979	0.000113484	0.00105775
Ifitm3	2627.25	-0.844293	0.21889	-3.85715	0.000114715	0.00106803
Bcl7b	478.751	0.550441	0.142704	3.85723	0.000114681	0.00106803
Pglyrp2	4175.63	0.459314	0.119094	3.85673	0.000114914	0.00106928
Atp1b3	685.164	-0.515583	0.133698	-3.85632	0.000115107	0.00107047
Csdc2	12.6501	-5.21668	1.35307	-3.85545	0.000115517	0.00107368
Rad52	138.82	0.7146	0.185372	3.85495	0.000115755	0.00107529
Metap1	695.854	0.407466	0.10571	3.85456	0.000115938	0.00107639
Egfr	960.812	0.657972	0.170742	3.85362	0.000116387	0.00107994
Ccne1	91.604	-1.39182	0.361198	-3.85335	0.000116515	0.00108052
Tmem208	588.936	-0.415527	0.107857	-3.85259	0.000116877	0.00108327
Trabd2b	14.1931	-2.63965	0.685429	-3.8511	0.000117591	0.00108928
Ankrd26	143.317	0.621194	0.161401	3.84876	0.000118717	0.0010991
Etv4	12.1508	-3.24273	0.842708	-3.84799	0.000119089	0.00110192
Tmbim1	156.139	-0.87054	0.226307	-3.84671	0.000119712	0.00110707
Lrig1	258.857	0.544874	0.141682	3.84575	0.000120182	0.0011103
Suv39h1l1	213.162	-0.594432	0.154569	-3.84573	0.000120196	0.0011103
Hsd3b7	1388.42	0.841886	0.218937	3.84534	0.000120387	0.00111145
LOC100364500	80.1227	1.02675	0.267054	3.84474	0.000120681	0.00111354
Cep95	415.178	0.709364	0.184512	3.84455	0.000120775	0.00111378
Caprin1	2992.41	0.400347	0.104157	3.84369	0.000121197	0.00111705
Mut	1867.78	0.493533	0.128406	3.84354	0.000121271	0.00111711
Gpc1	18.0515	-1.87922	0.48903	-3.84275	0.000121662	0.00111946
Ndufa2	1217.33	-0.536069	0.139498	-3.84286	0.000121611	0.00111946
Tmbim4	521.807	-0.63144	0.164362	-3.84177	0.000122152	0.00112335
Hid1	275.091	-0.737186	0.19195	-3.84051	0.000122777	0.00112847
Wsb1	2964.35	-0.962407	0.250748	-3.83815	0.000123964	0.00113874
Melk	57.2557	-1.26762	0.330291	-3.83788	0.000124102	0.00113904
Ccdc17	279.018	0.668348	0.174148	3.83782	0.000124134	0.00113904
Meaf6	214.271	0.61501	0.160282	3.83704	0.000124526	0.00114201
Atp8b2	191.809	-0.917919	0.239244	-3.83675	0.000124673	0.00114272
Tada2b	659.953	0.388741	0.101347	3.83572	0.000125197	0.00114631
Tns4	19.0067	-5.32295	1.38774	-3.83571	0.000125204	0.00114631
Ddx54	792.69	0.470072	0.122556	3.83556	0.00012528	0.00114638
Prag1	89.021	-1.22458	0.319381	-3.83422	0.000125965	0.001152
Ubtf	1549.96	0.444373	0.115941	3.83274	0.000126723	0.0011583
Ptov1	1263.16	-0.378998	0.0989239	-3.83121	0.000127516	0.0011649
Pdia4	6059.84	0.541966	0.14149	3.8304	0.000127933	0.00116806
Rpain	117.854	0.74892	0.19554	3.83001	0.000128137	0.00116929
Sae1	577.825	-0.551888	0.144143	-3.82875	0.000128796	0.00117465
Ube2j1	410.892	0.522981	0.1366	3.82855	0.000128902	0.00117497
Jkamp	297.984	0.477725	0.124795	3.82809	0.000129142	0.0011765
Tead1	65.4374	0.867454	0.226621	3.82777	0.000129309	0.00117739
Slc13a1	5.1679	-5.19597	1.35774	-3.82694	0.000129748	0.00118073
Kdm5c	944.166	0.476534	0.124545	3.8262	0.000130135	0.00118313
NEWGENE_6497122	29.0997	-1.15931	0.302995	-3.82617	0.000130155	0.00118313
Cep170b	961.026	0.497496	0.130029	3.82603	0.000130227	0.00118314
Lmo2	188.314	-0.6699	0.175098	-3.82586	0.000130317	0.00118327
Rasd1	530.076	-1.17451	0.307002	-3.82573	0.000130385	0.00118327
Srsf6	2146.52	-0.385167	0.10069	-3.82528	0.000130625	0.00118479
Fryl	324.334	0.51817	0.135488	3.82447	0.000131054	0.00118804
Cotl1	817.959	-0.454357	0.118808	-3.8243	0.000131146	0.00118822
Mgst3	892.497	0.647846	0.169489	3.82234	0.000132192	0.00119704
Fubp1	396.304	0.627967	0.164298	3.82213	0.000132306	0.00119742
Myo1a	8.13076	-3.47274	0.908677	-3.82175	0.000132509	0.00119794
Dnajc30	324.052	0.650261	0.170145	3.8218	0.00013248	0.00119794
Utp11	363.411	0.473329	0.123858	3.82154	0.00013262	0.00119829
RGD1302996	174.604	0.975166	0.255194	3.82127	0.000132766	0.00119895
Ifi44	240.578	0.636029	0.166456	3.821	0.00013291	0.0011996
Gnb2	2258.15	-0.347681	0.0910037	-3.82052	0.000133171	0.0012013
Sult1c3	631.398	1.41782	0.371198	3.81958	0.000133679	0.00120522
Jade1	372.575	0.654238	0.171309	3.81906	0.00013396	0.0012071
Wdr11	779.304	0.345569	0.0905848	3.81487	0.000136253	0.00122709
Nfia	870.044	0.55911	0.146596	3.81396	0.00013676	0.00123099
Hsd17b4	5596.96	0.404787	0.10614	3.8137	0.000136904	0.00123161
Ajuba	407.355	-0.737853	0.193483	-3.81352	0.000137002	0.00123183
Ddrgk1	2055.01	0.387163	0.10157	3.81177	0.000137975	0.0012399
Cyp17a1	8068.69	-1.62387	0.426077	-3.81121	0.000138291	0.00124206
LOC100365043	96.6089	1.08508	0.284721	3.81102	0.000138397	0.00124234
Zbtb16	130.313	2.86914	0.752953	3.81052	0.000138676	0.00124417
Plg	64948.8	0.348869	0.0916252	3.80757	0.000140339	0.00125741
Gne	2727.85	-0.593954	0.155996	-3.8075	0.00014038	0.00125741
Igfbp6	63.9705	-2.09104	0.54917	-3.80764	0.000140298	0.00125741
Ugdh	1434.23	0.762099	0.200172	3.80723	0.000140532	0.00125809
Hgs	912.127	0.469748	0.123448	3.80524	0.00014167	0.00126759
Cyba	409.084	-0.569293	0.149636	-3.80452	0.000142079	0.00127057
Dhx33	175.591	0.845924	0.222366	3.8042	0.000142262	0.00127152
Fau	3340.77	-0.523473	0.137696	-3.80165	0.000143738	0.00128385
Cox7a2l2	1124.22	-0.428488	0.112714	-3.80154	0.000143797	0.00128385
Tnrc6a	831.333	0.461457	0.121395	3.80128	0.000143948	0.0012845
Zfp36	1922.39	0.942396	0.247975	3.80036	0.000144487	0.00128861
Ube2e3	570.377	-0.456073	0.12002	-3.79999	0.000144704	0.00128985
Trim31	2.72349	-5.84268	1.53782	-3.79933	0.000145086	0.00129256
Ficd	310.111	0.758184	0.199587	3.79876	0.000145421	0.00129485
Paics	298.767	0.595997	0.156943	3.79753	0.000146142	0.00130057
Slc2a6	64.3188	-1.02934	0.271125	-3.79657	0.000146711	0.00130423
Ramp1	234.352	-0.791538	0.208486	-3.79659	0.000146698	0.00130423
Snrnp25	1414.68	-0.673308	0.177384	-3.79576	0.000147193	0.00130781
Upf2	633.714	0.532943	0.140428	3.79513	0.000147564	0.00130964
AABR07026291.1	125.682	0.914466	0.240958	3.79513	0.000147565	0.00130964
AY172581.18	156.71	-1.06793	0.281403	-3.79501	0.000147637	0.00130964
AABR07015729.1	148.04	0.956932	0.252233	3.79384	0.000148338	0.00131516
Lyrm1	77.1745	0.788673	0.207908	3.79337	0.000148615	0.00131691
Ppp1r11	694.783	0.393458	0.103748	3.79243	0.000149178	0.00132119
Ralgds	271.121	-0.581886	0.153457	-3.79185	0.00014953	0.0013236
Por	3414.01	0.676043	0.178308	3.79142	0.000149787	0.00132517
Cdc42ep1	1004.69	-0.718797	0.189729	-3.78855	0.000151526	0.00133911
Cfap52	6.50457	-5.12451	1.35258	-3.78868	0.000151451	0.00133911
Akr1c1	62.111	1.46866	0.387778	3.78738	0.000152243	0.00134473
Casp9	189.403	-0.494695	0.130649	-3.78644	0.000152822	0.00134912
Tmed2	5340.82	0.375931	0.0992938	3.78605	0.000153062	0.00135053
Ehd1	1743.91	0.413119	0.109141	3.7852	0.000153587	0.00135443
Myo1e	315.957	0.443323	0.117127	3.78498	0.000153721	0.00135489
Colec12	122.756	-1.30808	0.345681	-3.78407	0.000154284	0.00135913
Szrd1	1804.14	0.298349	0.0789085	3.78095	0.000156232	0.00137556
Adgrg6	196.736	-1.00941	0.267213	-3.77755	0.00015838	0.00139299
Ano9	32.1947	-1.32981	0.352027	-3.77758	0.000158357	0.00139299
Notch1	561.084	0.608342	0.16108	3.77664	0.00015896	0.00139735
Mir292	9.48482	2.72771	0.722285	3.7765	0.000159049	0.00139739
Acsf3	513.506	-0.520183	0.137787	-3.77528	0.000159831	0.00140351
Prpf38b	1321.89	0.467767	0.123918	3.7748	0.000160137	0.00140544
Cideb	3145.94	0.55688	0.147598	3.77296	0.000161322	0.0014151
Pkm	288.993	-0.649067	0.172108	-3.77127	0.000162419	0.00142321
Adgra2	185.177	-0.780773	0.207028	-3.77135	0.000162368	0.00142321
Med14	324.404	0.523486	0.138823	3.77089	0.000162669	0.00142465
Fam168a	522.45	0.437251	0.115972	3.7703	0.000163053	0.00142725
Svbp	67.701	-1.03216	0.27378	-3.77003	0.000163231	0.0014273
Hspa9	3025.84	0.566815	0.150346	3.77006	0.000163209	0.0014273
LOC680406	9693.25	3.02226	0.801768	3.76949	0.000163582	0.00142961
Frem1	64.3319	-1.10027	0.291979	-3.76831	0.000164357	0.00143563
Sub1	899.522	-0.468162	0.12428	-3.767	0.00016522	0.0014424
LOC100910669	13.4658	-2.38506	0.633223	-3.76654	0.000165524	0.0014443
Gemin2	134.389	-0.684984	0.181894	-3.76584	0.000165989	0.00144759
Dnaja3	2071.47	0.368513	0.0978743	3.76517	0.000166438	0.00145074
Rab11b	1681.86	0.404322	0.107407	3.76441	0.000166945	0.00145439
Psmd3	2099.81	0.435309	0.115648	3.76407	0.000167167	0.00145556
Timp2	502.874	-0.692191	0.183949	-3.76295	0.00016792	0.00146135
Immt	1463.04	0.344571	0.091576	3.76268	0.000168102	0.00146216
Slc30a3	98.0755	-1.01895	0.270932	-3.7609	0.000169301	0.00147182
U2surp	471.889	0.434783	0.115624	3.76031	0.000169705	0.00147455
Slc35g1	34.3043	1.40076	0.372563	3.7598	0.000170048	0.00147676
B3galt1	728.362	0.946162	0.251684	3.75933	0.00017037	0.00147723
Spats2	239.423	-0.564638	0.150194	-3.75938	0.000170336	0.00147723
Pgp	455.49	-0.745291	0.19824	-3.75954	0.000170228	0.00147723
Dennd4a	558.549	0.519632	0.13823	3.75919	0.000170466	0.00147728
Ascc1	455.307	0.486819	0.12952	3.75865	0.000170835	0.00147971
Ecd	308.736	0.574131	0.152811	3.75713	0.000171873	0.00148792
Il15	60.8388	-1.05003	0.279554	-3.75609	0.000172591	0.00149335
Prodh2	4095.87	-0.60142	0.160131	-3.7558	0.000172788	0.00149338
Furin	8086.29	0.332408	0.0885078	3.75569	0.000172865	0.00149338
Ankrd17	1259.24	0.423124	0.112655	3.75593	0.000172698	0.00149338
Rbm14	388.225	0.614351	0.163601	3.75519	0.000173212	0.00149559
LOC102550314	2.71771	6.33664	1.68758	3.75486	0.000173438	0.00149676
Wnt5b	16.2186	-2.0824	0.554636	-3.75454	0.000173662	0.00149791
Dennd1a	489.821	0.471416	0.1256	3.7533	0.00017452	0.00150453
Herc2	632.874	0.487641	0.129967	3.75204	0.0001754	0.00151133
Tspyl4	60.6235	0.849255	0.226414	3.7509	0.000176204	0.00151746
AABR07054614.1	603.23	-1.1124	0.296642	-3.74996	0.000176863	0.00152235
Edem2	940.578	0.356009	0.0949465	3.74958	0.000177133	0.00152388
Rab2a	828.069	0.529949	0.141413	3.74753	0.000178584	0.00153419
Trhde	87.1859	1.34009	0.357602	3.74743	0.000178659	0.00153419
Fam198a	90.0402	-1.95819	0.522552	-3.74736	0.000178703	0.00153419
Canx	9711.43	0.428789	0.11442	3.7475	0.000178607	0.00153419
Plxna3	104.246	-0.886541	0.236622	-3.74665	0.000179213	0.00153532
Twf2	100.666	-0.751982	0.200691	-3.74696	0.00017899	0.00153532
Atp5mc1	2533.82	-0.524949	0.140107	-3.74678	0.000179118	0.00153532
Unc13d	74.2434	-0.79115	0.211169	-3.74653	0.000179299	0.00153532
Asf1b	71.9315	-1.27365	0.339931	-3.74679	0.000179109	0.00153532
Ercc2	278.641	0.533133	0.142326	3.74586	0.000179774	0.00153859
Tmc4	24.3714	-2.04426	0.545865	-3.74498	0.000180408	0.00154322
AABR07006025.1	19.252	-1.94387	0.519095	-3.74472	0.000180593	0.001544
Scara3	23.1283	-2.53974	0.678265	-3.74446	0.000180779	0.0015448
Usp8	1152.27	0.449701	0.120117	3.74387	0.000181205	0.00154764
Selenoi	594.79	0.674866	0.180283	3.74337	0.000181568	0.00154936
Tut7	1718.95	0.499957	0.133559	3.74333	0.000181594	0.00154936
Cilp	24.5226	-2.01911	0.539495	-3.74259	0.000182136	0.00155318
LOC103689996	53.8128	-1.17212	0.31334	-3.74072	0.000183493	0.00156395
H2afy2	152.54	-0.988555	0.264443	-3.73826	0.000185301	0.00157854
Rabggtb	755.55	-0.442814	0.11846	-3.73809	0.000185424	0.00157878
Zc3h4	650.639	0.405853	0.108585	3.73765	0.000185745	0.0015807
Ufc1	1574.47	-0.352486	0.0943418	-3.73627	0.000186774	0.00158863
Krt17	10.3076	-4.88412	1.30746	-3.73559	0.000187274	0.00159207
Eloc	366.114	-0.556007	0.148897	-3.73418	0.000188329	0.00160022
Anpep	3856.71	0.484497	0.129778	3.73328	0.000189003	0.00160511
Ubqln4	1229.14	0.344837	0.0923736	3.73307	0.000189162	0.00160564
Ticrr	50.4712	-1.29627	0.347298	-3.73245	0.00018963	0.00160879
N4bp2	245.87	0.769506	0.206193	3.73198	0.000189984	0.00161096
Max	751.244	0.446657	0.119699	3.73151	0.000190332	0.00161309
Orai2	67.8528	-0.984521	0.263978	-3.72956	0.000191812	0.0016248
LOC100362333	53.2542	1.06072	0.284428	3.72931	0.000192004	0.0016256
Esr1	158.395	2.50802	0.672586	3.72893	0.000192295	0.00162723
AABR07037356.1	49.5246	1.17252	0.314463	3.72863	0.000192522	0.00162831
Grb14	1656.63	0.374625	0.100509	3.72727	0.000193566	0.0016363
Ltv1	313.836	0.438369	0.117636	3.72648	0.000194174	0.00164061
Mrps26	727.334	0.477621	0.128206	3.7254	0.000195002	0.00164676
Arhgef26	550.695	0.880852	0.236479	3.72486	0.00019542	0.00164945
Tm4sf5	7.86094	-3.45112	0.92688	-3.72337	0.000196583	0.00165841
Mir295-1	8.90602	3.12326	0.839162	3.72189	0.00019774	0.00166733
Clcf1	77.3583	-1.06029	0.284972	-3.72068	0.000198684	0.00167443
AABR07021704.1	48.7513	1.0326	0.277635	3.71928	0.000199792	0.00168292
Cd33	29.6842	-1.55011	0.416862	-3.71851	0.000200399	0.00168621
Gphn	678.888	0.490965	0.132032	3.71854	0.000200378	0.00168621
LOC691141	342.695	-0.734491	0.197529	-3.7184	0.00020049	0.00168621
Zbtb38	115.942	0.70718	0.190237	3.71735	0.000201322	0.00169235
Smarcc2	1322.09	0.580563	0.156197	3.71685	0.000201719	0.00169482
Nek4	202.46	0.58964	0.15879	3.71333	0.000204548	0.00171773
Trappc4	161.246	-0.616063	0.166015	-3.71089	0.000206533	0.00173351
Pcmt1	264.999	-0.517343	0.139483	-3.709	0.000208081	0.00174474
Nlrp12	171.148	1.04293	0.28118	3.7091	0.000207997	0.00174474
Aste1	93.0905	-0.928561	0.250369	-3.70878	0.000208262	0.00174537
Ints10	250.645	-0.596841	0.160975	-3.70766	0.000209187	0.00175223
Usp43	15.8333	-1.80966	0.488301	-3.70604	0.000210529	0.00176258
Fbn1	821.68	-0.721743	0.194759	-3.70583	0.000210698	0.00176311
Sdr16c5	5.87596	-5.05471	1.3647	-3.70389	0.000212314	0.00177573
Slc37a2	158.118	-0.83358	0.225125	-3.70274	0.000213282	0.00178292
AABR07029970.1	26.3858	-2.88692	0.779942	-3.70145	0.000214372	0.00179113
Dpagt1	904.221	0.39357	0.106342	3.70098	0.000214767	0.00179352
RGD1561149	454.463	-0.861403	0.23276	-3.70083	0.000214896	0.00179369
Mt-cyb	302408	0.578229	0.156255	3.70055	0.00021513	0.00179474
Thrb	805.521	0.491053	0.132716	3.70002	0.000215584	0.00179762
Adipoq	29.2264	-7.50607	2.02882	-3.69973	0.00021583	0.00179877
Isca2	389.768	0.487774	0.131855	3.69931	0.000216185	0.00180025
Dgat1	637.772	-0.45535	0.123092	-3.69926	0.000216226	0.00180025
Lpxn	107.818	-0.749281	0.202655	-3.69732	0.000217886	0.00181315
Lrsam1	92.442	0.779499	0.210901	3.69604	0.000218986	0.00182048
Tmem200c	9.11265	-3.37485	0.913076	-3.69613	0.000218912	0.00182048
Gpr37l1	5.53934	-5.46484	1.47868	-3.69576	0.000219229	0.00182158
Stradb	1285.78	0.422117	0.114227	3.69542	0.000219527	0.00182315
Anxa4	1062.05	-0.660877	0.178899	-3.69414	0.000220633	0.00183141
C1qbp	1680.41	0.395402	0.107093	3.69215	0.00022237	0.0018449
Dnttip2	398.756	0.491279	0.133102	3.69099	0.000223381	0.00185236
Mrpl35	461.449	-0.444469	0.120426	-3.69081	0.000223542	0.00185276
Afdn	584.846	0.579867	0.157122	3.69056	0.000223758	0.00185362
AABR07015015.2	36.8588	-1.32849	0.360169	-3.68852	0.00022556	0.0018672
Elp2	472.878	0.529315	0.143506	3.68845	0.000225623	0.0018672
Gfm1	1095.79	0.460154	0.124768	3.68808	0.000225953	0.00186821
[truncated: 3,500 more rows]

## Sheet: 90d
symbol	baseMean	log2FoldChange	lfcSE	stat	pvalue	padj
LOC103690108	516.237	-2.91379	0.148219	-19.6587	4.87217e-86	8.25492e-82
Duoxa1	152.383	-4.65479	0.250161	-18.6071	2.81208e-77	2.38225e-73
Nptx2	139.193	7.41354	0.42531	17.4309	4.80633e-68	2.71446e-64
AABR07044362.1	126.621	-6.02696	0.367811	-16.386	2.40726e-60	1.01965e-56
Lamc2	384.443	-4.34568	0.277432	-15.664	2.6667e-55	9.03638e-52
Scrn1	101.917	-5.29123	0.338589	-15.6273	4.74582e-55	1.34014e-51
Habp2	5963.56	1.71193	0.111826	15.3089	6.66943e-53	1.61429e-49
Rhpn1	157.774	-3.72902	0.245231	-15.2062	3.21806e-52	6.81545e-49
Fam89a	362.028	-5.04328	0.334452	-15.0793	2.21746e-51	4.17449e-48
AABR07044383.1	106.491	-3.81491	0.262172	-14.5512	5.73987e-48	9.72506e-45
Fam111a	1397.35	-6.46022	0.452613	-14.2732	3.21703e-46	4.95511e-43
Scube1	66.7969	-4.96883	0.355084	-13.9934	1.71078e-44	2.41548e-41
Lyc2	212.812	-6.13299	0.440563	-13.9208	4.73444e-44	6.17043e-41
Parm1	233.893	-4.55675	0.331349	-13.7521	4.94718e-43	5.98714e-40
Rpl30	794.57	2.34187	0.170573	13.7294	6.7665e-43	7.64299e-40
Neurl3	128.368	-3.98883	0.295381	-13.504	1.48081e-41	1.56809e-38
Rtn4	1270.4	-2.2029	0.163443	-13.4781	2.10501e-41	2.09795e-38
Acox2	10407.8	1.6243	0.121319	13.3886	7.04521e-41	6.63149e-38
Ceacam1	4784.4	1.50007	0.113178	13.2542	4.26906e-40	3.80688e-37
Arpc1b	1430.82	-1.16649	0.0886808	-13.1538	1.61829e-39	1.37094e-36
Tf	799615	-1.12899	0.0865823	-13.0395	7.29592e-39	5.88642e-36
Pip4p2	359.051	-2.11727	0.165395	-12.8013	1.61274e-37	1.24203e-34
Serpina4	17142.8	1.36849	0.106932	12.7977	1.68808e-37	1.24353e-34
Wnt4	157.417	-2.20415	0.17378	-12.6836	7.29116e-37	5.14726e-34
Lbp	10649	-3.03139	0.239102	-12.6783	7.80506e-37	5.28965e-34
Psmg3	323.683	-2.061	0.164343	-12.5408	4.46332e-36	2.90854e-33
S1pr2	220.861	-2.70363	0.21799	-12.4026	2.53105e-35	1.58828e-32
Slc43a2	501.472	-1.6682	0.135544	-12.3074	8.25982e-35	4.99807e-32
Abcc3	681.385	-2.31656	0.189923	-12.1974	3.20955e-34	1.87515e-31
Mvp	1315.75	-1.32536	0.109522	-12.1013	1.03943e-33	5.87033e-31
Chpf	263.814	-2.39033	0.199883	-11.9587	5.84916e-33	3.19685e-30
Unc5cl	342.056	-3.10184	0.262283	-11.8263	2.85346e-32	1.51082e-29
Npdc1	340.436	-1.79579	0.152039	-11.8113	3.41067e-32	1.75112e-29
LOC689064	665.43	-3.07664	0.262652	-11.7138	1.08374e-31	5.40054e-29
Igf2bp3	620.1	2.84716	0.243167	11.7086	1.151e-31	5.57184e-29
Tax1bp3	513.168	-1.53698	0.132582	-11.5927	4.48887e-31	2.11264e-28
Lgals2	220.159	-3.43811	0.298101	-11.5334	8.95408e-31	4.10024e-28
Pltp	1169.72	-1.23159	0.107646	-11.4412	2.60291e-30	1.16055e-27
Plpp2	411.338	-2.21412	0.195235	-11.3408	8.24121e-30	3.58028e-27
Ppl	151.997	-2.75559	0.243118	-11.3344	8.86486e-30	3.75493e-27
Cdc42se2	305.708	-1.41442	0.125161	-11.3009	1.29937e-29	5.36955e-27
Aspscr1	975.887	-1.15236	0.102046	-11.2926	1.42733e-29	5.75792e-27
Relb	121.18	-2.88869	0.258674	-11.1673	5.89494e-29	2.32274e-26
F11r	2938.96	-0.933952	0.0837798	-11.1477	7.34896e-29	2.82985e-26
Ccdc77	268.851	-2.08043	0.187025	-11.1238	9.60741e-29	3.61729e-26
Kif12	238.001	-2.66999	0.241601	-11.0513	2.16133e-28	7.96075e-26
Gstm3l	132.59	-4.06444	0.368508	-11.0294	2.75567e-28	9.9339e-26
Lig4	200.367	1.81542	0.164817	11.0147	3.24512e-28	1.14546e-25
Atg16l2	508.553	-2.16658	0.197805	-10.9531	6.41869e-28	2.21943e-25
Adora1	296.585	-2.90753	0.265524	-10.9502	6.63194e-28	2.2473e-25
LOC100360791	3679.89	-1.79448	0.164538	-10.9062	1.07649e-27	3.50748e-25
P2rx5	81.6495	-6.70972	0.615139	-10.9077	1.05958e-27	3.50748e-25
Mia2	3573.07	1.0675	0.0979082	10.9031	1.11457e-27	3.56306e-25
Inpp1	172.969	-2.01204	0.184665	-10.8956	1.20915e-27	3.79382e-25
Resp18	51.1149	5.6169	0.516047	10.8845	1.36695e-27	4.21095e-25
Sri	675.111	-1.86901	0.173162	-10.7935	3.6964e-27	1.11836e-24
Ifi30	1751.32	-0.951747	0.0889673	-10.6977	1.0432e-26	3.10088e-24
Mfge8	4007	-1.21831	0.11397	-10.6897	1.13754e-26	3.32298e-24
Tnfrsf12a	166.786	-2.63305	0.247604	-10.6341	2.06735e-26	5.9368e-24
RT1-CE1	106.785	2.26256	0.213603	10.5924	3.23319e-26	9.13e-24
Marveld1	626.524	-2.73595	0.260256	-10.5125	7.5646e-26	2.1011e-23
Nf1x	339.163	1.72934	0.164575	10.5079	7.94034e-26	2.16989e-23
Cnp	383.155	-1.33711	0.127663	-10.4737	1.14054e-25	3.06734e-23
Tapbp	705.144	-1.27128	0.121546	-10.4593	1.32812e-25	3.516e-23
Cyp3a62	167.813	-3.08656	0.295364	-10.45	1.46506e-25	3.81886e-23
Lcn2	2785.2	-7.2354	0.693393	-10.4348	1.72018e-25	4.4159e-23
Ptprf	6034.47	1.09977	0.105444	10.43	1.80944e-25	4.57572e-23
Hmox1	1581.1	-2.00195	0.191974	-10.4283	1.84204e-25	4.58965e-23
Lurap1l	335.786	-2.18927	0.210855	-10.3828	2.96815e-25	7.28831e-23
Rhbdf2	212.654	-1.94924	0.18783	-10.3777	3.13233e-25	7.58159e-23
Hp	218907	-1.57223	0.151612	-10.3701	3.39177e-25	8.0939e-23
Krt8	5216.21	-1.46267	0.141384	-10.3453	4.39312e-25	1.03379e-22
MGC108823	94.3532	-3.64866	0.352936	-10.338	4.74174e-25	1.10054e-22
Plau	342.666	-2.65793	0.257403	-10.326	5.37831e-25	1.23142e-22
Pnpo	1325.22	-1.06708	0.10387	-10.2732	9.30296e-25	2.1016e-22
Dctn1	1244.37	-1.07513	0.104997	-10.2397	1.31683e-24	2.93565e-22
Prkd3	1475.28	1.20088	0.117491	10.2211	1.59561e-24	3.51097e-22
RGD1560242	80.9487	8.76091	0.860414	10.1822	2.38128e-24	5.17256e-22
LOC100134871	2972.09	-3.41773	0.33843	-10.0988	5.59302e-24	1.19953e-21
Duox1	133.182	-4.20237	0.416271	-10.0953	5.79759e-24	1.22786e-21
Rnd1	130.567	-2.72085	0.270772	-10.0485	9.32685e-24	1.95092e-21
Tifa	121.195	-2.72203	0.271567	-10.0234	1.20259e-23	2.48481e-21
Krt18	5686.08	-1.32804	0.132628	-10.0132	1.33328e-23	2.72165e-21
Ajuba	407.355	-1.97469	0.197437	-10.0016	1.49893e-23	3.02337e-21
Enc1	965.913	-2.31867	0.23232	-9.98049	1.85543e-23	3.69843e-21
Scrn3	493.474	1.47115	0.147572	9.96902	2.08267e-23	4.10309e-21
5330417C22Rik	141.592	2.43793	0.24631	9.89782	4.25438e-23	8.28529e-21
Ndrg2	13337.1	1.16694	0.118137	9.87785	5.19333e-23	9.99894e-21
LOC100362027	2222.14	-1.56347	0.158372	-9.87218	5.49592e-23	1.04626e-20
Tead4	128.864	-2.35448	0.239203	-9.84304	7.34593e-23	1.38291e-20
Zcchc2	444.273	1.11053	0.113031	9.82495	8.79191e-23	1.63694e-20
Hbb	8689.02	-2.55315	0.260039	-9.81832	9.38939e-23	1.72918e-20
Slc6a1	44.7081	5.39514	0.549697	9.81474	9.72882e-23	1.77242e-20
Prox1	1357.79	1.2565	0.128144	9.80541	1.06714e-22	1.92347e-20
Ccng1	648.562	-1.24407	0.12735	-9.7689	1.53104e-22	2.73057e-20
Tnfaip3	127.187	-2.43994	0.251234	-9.71186	2.68406e-22	4.73709e-20
Plxnb1	857.278	-2.05626	0.211818	-9.70769	2.79611e-22	4.88396e-20
Ppard	681.851	1.93822	0.199724	9.70454	2.88387e-22	4.98585e-20
AABR07044414.1	65.0103	-2.1417	0.222577	-9.62227	6.43925e-22	1.10202e-19
Gucy2c	96.9701	-8.09541	0.846032	-9.56868	1.08281e-21	1.8346e-19
Nfkb2	332.47	-1.77356	0.185604	-9.55565	1.22808e-21	2.06014e-19
AC134224.3	2409.55	2.37168	0.248563	9.54158	1.40677e-21	2.33676e-19
Pdia5	908.334	-2.76097	0.28943	-9.53932	1.4377e-21	2.36494e-19
Prmt2	82.0499	-2.0791	0.21815	-9.53059	1.56398e-21	2.54793e-19
Pcdha6	95.1943	2.95498	0.310633	9.51277	1.85643e-21	2.99558e-19
Impa2	290.627	-1.66474	0.175364	-9.493	2.24474e-21	3.58798e-19
Tmed3	364.515	-1.34537	0.141983	-9.47559	2.6525e-21	4.20013e-19
Wfdc21	2714.89	-3.32233	0.351013	-9.46498	2.93609e-21	4.60612e-19
Cyb561	107.708	-2.76708	0.293812	-9.41785	4.60398e-21	7.15644e-19
Abcg5	1543.47	5.37402	0.57161	9.40154	5.37698e-21	8.28202e-19
Cry1	183.127	2.18536	0.232876	9.38421	6.33869e-21	9.67535e-19
Gsta5	9456.73	1.95939	0.208979	9.376	6.8522e-21	1.03658e-18
Lgalsl	595.915	1.32289	0.141551	9.3457	9.12815e-21	1.36866e-18
Cryab	218.477	-2.18223	0.234139	-9.32024	1.16073e-20	1.71681e-18
Nol3	34.1135	-3.71934	0.399078	-9.31983	1.16528e-20	1.71681e-18
Enpep	978.447	1.74703	0.187819	9.30167	1.38257e-20	2.01938e-18
RT1-N2	277.871	13.2608	1.42694	9.29318	1.49742e-20	2.16845e-18
Pla2g15	438.121	-1.57845	0.17088	-9.23721	2.53003e-20	3.63274e-18
Mest	524.921	2.64797	0.287082	9.22371	2.8699e-20	4.08611e-18
Gnptab	495.99	-0.984147	0.106964	-9.20072	3.55559e-20	5.0202e-18
Fblim1	187.483	-2.74476	0.298907	-9.18266	4.2059e-20	5.8893e-18
Cpxm2	29.5607	-4.49537	0.49011	-9.17216	4.63624e-20	6.43868e-18
Dlc1	1099.76	1.10725	0.120748	9.17	4.73028e-20	6.51587e-18
Lmna	1196.17	-0.934866	0.101986	-9.1666	4.88173e-20	6.67026e-18
Glb1l2	118.632	-2.60635	0.285026	-9.14424	6.00501e-20	8.13943e-18
Abcd2	690.33	2.91037	0.320023	9.09426	9.52315e-20	1.28056e-17
Eml4	939.571	0.828359	0.0911487	9.088	1.00879e-19	1.34582e-17
Vnn1	450.037	-2.20758	0.242974	-9.08568	1.03056e-19	1.36412e-17
Bmp2	296.506	1.67173	0.184393	9.06611	1.23343e-19	1.61999e-17
Sh3bp4	239.863	-1.88247	0.207899	-9.05474	1.36895e-19	1.78416e-17
Tspan8	210.801	-3.70173	0.409003	-9.05061	1.42168e-19	1.83874e-17
Sirpa	1356.83	-1.36148	0.15062	-9.03918	1.57855e-19	2.02616e-17
Col13a1	276.594	2.00065	0.22149	9.03272	1.67457e-19	2.13325e-17
Slc28a2	1521.52	1.35806	0.150442	9.02718	1.76159e-19	2.22736e-17
Rhod	604.566	-1.27229	0.14101	-9.0227	1.83517e-19	2.30321e-17
Mxd1	399.962	-1.49884	0.166312	-9.01221	2.01949e-19	2.5159e-17
Adgrg1	190.632	-2.62854	0.292082	-8.99935	2.27058e-19	2.80806e-17
Ms4a18	57.1691	-5.99488	0.66754	-8.98055	2.6942e-19	3.29665e-17
Dram1	127.193	-2.62501	0.292313	-8.98013	2.70457e-19	3.29665e-17
RT1-A2	1253.51	1.5314	0.170579	8.97767	2.76573e-19	3.34712e-17
Mapk4	26.5673	-3.25878	0.363046	-8.97623	2.80208e-19	3.36706e-17
Pold4	935.244	-1.06151	0.118621	-8.94874	3.59574e-19	4.29032e-17
Acy1	1642.53	1.0955	0.122641	8.93258	4.16199e-19	4.93123e-17
Sorbs3	825.154	1.16599	0.130839	8.91167	5.02715e-19	5.91492e-17
Abca2	1215.5	-1.03527	0.116372	-8.89625	5.77633e-19	6.74954e-17
Tmem106a	270.299	-1.52952	0.172267	-8.87874	6.76193e-19	7.84708e-17
Anxa2	988.277	-1.70674	0.192261	-8.87717	6.8585e-19	7.905e-17
Ltbp2	331.51	-2.28495	0.257452	-8.87525	6.97792e-19	7.9883e-17
Laptm5	799.241	-1.03484	0.117184	-8.83087	1.03869e-18	1.1811e-16
Nenf	273.743	-1.33448	0.151874	-8.78675	1.5395e-18	1.73892e-16
Laptm4b	710.44	1.58729	0.181345	8.75288	2.0797e-18	2.33354e-16
Axl	1060	-0.979757	0.111978	-8.74952	2.14261e-18	2.3727e-16
Ptk2b	604.197	-1.56499	0.178856	-8.75001	2.13343e-18	2.3727e-16
Alpl	172.923	-3.32356	0.380204	-8.74153	2.29984e-18	2.53027e-16
Leo1	493.453	1.18316	0.13542	8.73697	2.3944e-18	2.61731e-16
Acsf3	513.506	-1.24186	0.142219	-8.73207	2.50058e-18	2.71585e-16
Rnh1	975.883	-0.872272	0.0999321	-8.72865	2.57726e-18	2.7813e-16
Glrx	1282.84	-1.2765	0.146276	-8.72668	2.62262e-18	2.81234e-16
Tusc3	131.122	-2.30468	0.264118	-8.72596	2.63937e-18	2.8125e-16
Bok	95.4478	-3.12573	0.359349	-8.69833	3.36815e-18	3.56666e-16
Hmgn5b	102.618	2.65302	0.305179	8.69331	3.52038e-18	3.70471e-16
Tmem150c	130.864	-1.45774	0.167793	-8.6877	3.69859e-18	3.86822e-16
Ikbkb	838.685	-0.745477	0.0858451	-8.68398	3.82148e-18	3.97223e-16
Abcg8	827.416	6.62004	0.764678	8.65729	4.83133e-18	4.9913e-16
Tmem243	480.242	-1.39622	0.16133	-8.65442	4.95446e-18	5.08748e-16
Aoc1	72.3148	-5.13133	0.59417	-8.63612	5.81526e-18	5.93541e-16
Jak3	383.029	-1.41606	0.163991	-8.635	5.87248e-18	5.95793e-16
Tsx	316.043	-5.18998	0.601275	-8.63161	6.04925e-18	6.10074e-16
Tspyl4	60.6235	2.17252	0.251764	8.62921	6.17748e-18	6.1932e-16
Krt7	251.943	-4.79402	0.555982	-8.62261	6.54434e-18	6.5224e-16
Tspo	121.038	-2.36269	0.274933	-8.59371	8.42018e-18	8.34287e-16
Etfrf1	255.03	1.72389	0.200862	8.58244	9.28796e-18	9.14918e-16
Per3	380.986	-2.97496	0.346705	-8.58068	9.43172e-18	9.23709e-16
Tollip	1191.31	-1.09154	0.127261	-8.57717	9.72389e-18	9.4685e-16
Blmh	579.775	-1.11671	0.130211	-8.57614	9.81115e-18	9.49887e-16
Lasp1	3494.38	-0.823844	0.0960844	-8.57417	9.9808e-18	9.60823e-16
Acsl1	35893.3	1.39469	0.1628	8.56691	1.06297e-17	1.01751e-15
Hal	3509.41	2.0469	0.239132	8.55971	1.1315e-17	1.07702e-15
Loxl1	331.125	-2.26623	0.265053	-8.55009	1.2299e-17	1.16414e-15
Fam49a	443.208	-1.40971	0.165161	-8.53535	1.39736e-17	1.3153e-15
Gjb1	15753.9	0.977172	0.114505	8.53386	1.4154e-17	1.32492e-15
C1s	9264.82	-1.17364	0.137626	-8.52772	1.49256e-17	1.38947e-15
Emc2	554.312	1.05409	0.123624	8.5266	1.50708e-17	1.39533e-15
LOC100911107	57.0162	-10.6978	1.25492	-8.52467	1.53241e-17	1.41106e-15
Dcxr	3589.63	1.374	0.161241	8.52137	1.57678e-17	1.44408e-15
RT1-Bb	745.639	-2.51671	0.296146	-8.4982	1.92552e-17	1.75399e-15
Msln	578.743	-3.7939	0.446575	-8.49556	1.96976e-17	1.78468e-15
Trpm2	512.074	-1.37819	0.162358	-8.48858	2.09182e-17	1.8852e-15
Golga4	1505.94	0.716818	0.0844528	8.4878	2.10594e-17	1.88788e-15
Hpx	139397	-1.35263	0.159616	-8.47433	2.3644e-17	2.10843e-15
Creg1	2658.78	1.40388	0.165895	8.46246	2.61797e-17	2.32232e-15
Ccdc68	32.9972	-3.8409	0.454147	-8.45739	2.73436e-17	2.41293e-15
Tpd52	399.543	-1.22884	0.145368	-8.45334	2.83093e-17	2.48521e-15
Anxa5	781.844	-1.1531	0.136836	-8.42686	3.55074e-17	3.0694e-15
Comtd1	307.903	-1.51642	0.179934	-8.42764	3.52719e-17	3.0694e-15
Borcs8	340.011	-1.31149	0.155624	-8.42732	3.53674e-17	3.0694e-15
Dusp3	1550.34	-0.627354	0.0744744	-8.42376	3.64594e-17	3.13569e-15
Tap2	75.9226	-2.03172	0.241234	-8.4222	3.69476e-17	3.16164e-15
Emcn	254.353	1.53561	0.182556	8.41174	4.03976e-17	3.43948e-15
Tef	769.959	-1.65188	0.196511	-8.40605	4.24061e-17	3.59243e-15
Sephs2	1924.69	1.39397	0.165891	8.40293	4.35468e-17	3.67072e-15
Otogl	121.874	2.15754	0.25757	8.37652	5.45136e-17	4.5724e-15
Lama5	561.407	-1.98433	0.236941	-8.37481	5.53128e-17	4.61657e-15
Megf11	71.5977	2.27627	0.272142	8.36426	6.0493e-17	5.02418e-15
Eif3a	3460.54	0.910351	0.109076	8.34604	7.05924e-17	5.83437e-15
Clec2l	76.6224	-3.36607	0.40369	-8.33825	7.53967e-17	6.20119e-15
Prss8	135.175	-2.53544	0.304787	-8.31873	8.89123e-17	7.2775e-15
Ext1	974.849	-1.02324	0.123069	-8.31433	9.22716e-17	7.51615e-15
Cav2	249.226	-1.64989	0.198857	-8.29684	1.06915e-16	8.6673e-15
Anpep	3856.71	1.07823	0.130072	8.28953	1.13692e-16	9.17281e-15
AABR07072511.1	137.411	10.3445	1.24867	8.28439	1.18714e-16	9.53258e-15
Slco2a1	7271.07	0.837364	0.101123	8.28068	1.22476e-16	9.78823e-15
Nipal2	222.771	-1.6213	0.195809	-8.28003	1.23144e-16	9.79547e-15
Sos1	611.946	1.0559	0.127603	8.27489	1.28577e-16	1.01798e-14
AABR07044080.2	263.926	-1.23839	0.149927	-8.25995	1.45736e-16	1.14846e-14
Creb3l1	399.385	1.40563	0.170379	8.25005	1.58335e-16	1.24197e-14
Nr1d2	597.911	-1.91963	0.232706	-8.24916	1.59515e-16	1.24547e-14
Cldn6	73.5305	-4.34789	0.527319	-8.24528	1.64776e-16	1.28064e-14
C4bpa	14587.9	-1.15166	0.139724	-8.24238	1.68814e-16	1.30604e-14
Cyp2e1	83262	1.23704	0.150318	8.22944	1.88088e-16	1.44853e-14
Zfp276	386.706	-1.32715	0.161323	-8.22668	1.92474e-16	1.47561e-14
Tap1	534.603	-1.3382	0.162811	-8.21931	2.04677e-16	1.56209e-14
Celsr1	84.998	-3.6429	0.443758	-8.20921	2.22642e-16	1.69158e-14
Cdc42se1	1139.6	-0.946463	0.115338	-8.206	2.28688e-16	1.72227e-14
Slc11a2	614.168	-0.812676	0.0990345	-8.20598	2.28714e-16	1.72227e-14
Hivep2	86.5165	-1.93193	0.235536	-8.20227	2.35898e-16	1.7685e-14
Tmsb4x	5473.07	-1.03559	0.126355	-8.19583	2.48875e-16	1.85757e-14
Sult2a2	30906.8	1.77611	0.216987	8.18533	2.7155e-16	2.01793e-14
Stambpl1	347.818	1.1912	0.146029	8.15732	3.42552e-16	2.53444e-14
AABR07050652.1	38.2139	-2.5405	0.311959	-8.14371	3.8334e-16	2.82388e-14
AABR07027750.1	929.126	1.47526	0.1814	8.13264	4.20023e-16	3.08072e-14
Rtp4	530.771	1.28452	0.158586	8.0998	5.50486e-16	4.02021e-14
Apoc2	23925.1	1.07239	0.132645	8.08468	6.23276e-16	4.53226e-14
Cxcl12	6253.82	2.23399	0.276469	8.08043	6.45387e-16	4.67299e-14
Spint1	83.3518	-2.41063	0.298395	-8.07864	6.54918e-16	4.72182e-14
Unc5a	16.3598	5.2974	0.656075	8.07437	6.78238e-16	4.86923e-14
Dpys	6041.07	1.34598	0.166756	8.07157	6.9401e-16	4.96144e-14
Wfdc2	938.468	-1.95041	0.241747	-8.06798	7.14724e-16	5.08806e-14
Usf2	1513.02	0.782373	0.097392	8.03323	9.49366e-16	6.73017e-14
Krt10	485.327	-1.69845	0.211746	-8.02117	1.04743e-15	7.39445e-14
Junb	527.526	-2.37011	0.295991	-8.00736	1.17201e-15	8.23958e-14
Cd63	1777.84	-1.91741	0.240196	-7.98272	1.43148e-15	1.00221e-13
Hyal1	317.567	1.05236	0.131853	7.98135	1.44747e-15	1.00924e-13
Stac3	310.638	9.21144	1.15423	7.98059	1.45633e-15	1.01125e-13
Epcam	533.146	-2.05135	0.257103	-7.97872	1.47862e-15	1.02254e-13
Glt8d1	222.151	-1.28419	0.161446	-7.9543	1.80146e-15	1.24073e-13
Rtp3	1681.75	1.56254	0.19659	7.94824	1.89187e-15	1.29773e-13
Mgmt	515.763	-0.967639	0.121914	-7.93706	2.07028e-15	1.41439e-13
B4galt5	350.943	-1.68701	0.212603	-7.93501	2.1048e-15	1.43219e-13
Ptms	16593.5	1.17479	0.14815	7.92975	2.19589e-15	1.4882e-13
Rida	18854.3	1.1646	0.146888	7.92851	2.21791e-15	1.49713e-13
Adamts15	219.788	-2.57497	0.325179	-7.91861	2.40177e-15	1.61481e-13
Dmtn	190.089	2.1133	0.266898	7.91802	2.41328e-15	1.61613e-13
LOC103694857	662.86	-3.08149	0.389283	-7.9158	2.45662e-15	1.63868e-13
St3gal4	862.383	-0.806157	0.101874	-7.91326	2.50729e-15	1.65942e-13
Tmem184a	165.553	-1.20474	0.152234	-7.91369	2.49869e-15	1.65942e-13
Ptprd	1913.42	1.29883	0.164733	7.88444	3.15946e-15	2.08291e-13
Tspo2	36.7777	-4.69063	0.595293	-7.87953	3.28618e-15	2.15805e-13
Akr1c14	24497.7	1.0971	0.13928	7.87693	3.35513e-15	2.19483e-13
Reg3b	175.49	-10.9496	1.39234	-7.86415	3.71606e-15	2.41816e-13
St14	177.931	-1.86537	0.237208	-7.86385	3.72508e-15	2.41816e-13
Ncor1	1724.76	0.698765	0.0888959	7.86049	3.82627e-15	2.47437e-13
Sidt1	59.6675	-5.07826	0.647572	-7.842	4.43435e-15	2.8567e-13
Smc1a	1449.89	0.905918	0.115707	7.82942	4.90139e-15	3.14561e-13
Sord	12386.1	1.09165	0.139477	7.82673	5.00732e-15	3.20147e-13
Kcna2	132.303	-2.02292	0.258547	-7.82419	5.1095e-15	3.25452e-13
Ptgs1	843.801	-0.905596	0.116029	-7.80489	5.95523e-15	3.76491e-13
AA926063	46.284	-2.60144	0.333307	-7.80493	5.95349e-15	3.76491e-13
Trpm4	174.594	-2.14265	0.274592	-7.80304	6.04319e-15	3.77822e-13
Plin3	676.257	-1.09634	0.140485	-7.80395	5.99991e-15	3.77822e-13
Tep1	501.05	-1.04588	0.134034	-7.8031	6.04039e-15	3.77822e-13
Prpf3	635.108	0.863388	0.110735	7.79686	6.34668e-15	3.95337e-13
Unc93b1	548.375	-0.874258	0.112206	-7.79153	6.62028e-15	4.10498e-13
Lrrc8b	302.976	1.04313	0.133887	7.79118	6.63852e-15	4.10498e-13
Myh10	440.208	-1.72766	0.221974	-7.78316	7.07368e-15	4.35816e-13
Lyz2	939.16	-1.83381	0.235856	-7.77515	7.53584e-15	4.62607e-13
Cd44	262.439	-2.23247	0.287515	-7.76469	8.18451e-15	5.00614e-13
Mt-nd2	294823	1.50105	0.19339	7.76178	8.37473e-15	5.10407e-13
Zc3h18	944.009	0.917128	0.118186	7.76007	8.48822e-15	5.15469e-13
Sat2	509.406	1.34331	0.173312	7.75082	9.13024e-15	5.52477e-13
Chd9	455.046	1.21799	0.157385	7.73894	1.00252e-14	6.04472e-13
Abca8	612.331	-1.50407	0.194437	-7.73553	1.02976e-14	6.18697e-13
Inf2	290.074	-1.14418	0.148345	-7.71299	1.22908e-14	7.35841e-13
Ddhd1	884.226	1.6194	0.209988	7.71186	1.23997e-14	7.39749e-13
RGD1563354	134.176	-3.01438	0.391256	-7.70437	1.31494e-14	7.81717e-13
AC130970.1	301.512	-2.82687	0.36811	-7.67942	1.59812e-14	9.46746e-13
Rdx	1062.93	1.4624	0.190503	7.67651	1.63475e-14	9.65074e-13
Mgam	750.515	1.43771	0.187442	7.67018	1.7175e-14	1.0104e-12
Kdelr3	167.427	-1.54756	0.201983	-7.66183	1.833e-14	1.07462e-12
Yeats4	552.336	-1.02404	0.133859	-7.65019	2.00685e-14	1.17248e-12
Pgpep1	1409.02	1.27049	0.166154	7.64646	2.0658e-14	1.20278e-12
Cldn4	64.2426	-3.68489	0.482628	-7.63504	2.25749e-14	1.30989e-12
Dstn	1036.44	1.05181	0.138083	7.61725	2.59128e-14	1.49843e-12
AABR07045400.1	24.8454	3.02841	0.398233	7.60462	2.85743e-14	1.64672e-12
Pamr1	406.451	-1.83452	0.241436	-7.59839	2.99832e-14	1.72205e-12
Stard3nl	206.322	-1.31509	0.173158	-7.59471	3.0849e-14	1.76579e-12
Gnl1	807.832	-1.03125	0.135898	-7.58837	3.2396e-14	1.8481e-12
Reg4	93.8783	-2.68562	0.354158	-7.58311	3.37365e-14	1.91811e-12
Dusp15	32.207	-6.01827	0.795604	-7.5644	3.89674e-14	2.20811e-12
Pld4	591.293	-0.976053	0.129068	-7.56233	3.95908e-14	2.23222e-12
LOC691352	61.6139	-9.53668	1.26111	-7.56212	3.96563e-14	2.23222e-12
Lamb3	144.714	-2.67773	0.354123	-7.56159	3.98181e-14	2.2339e-12
Cpa1	1437.19	4.00459	0.531742	7.53108	5.03213e-14	2.81374e-12
Smim14	1670.68	-0.877044	0.116463	-7.53066	5.04856e-14	2.81374e-12
Mt-atp8	79598	1.89205	0.251363	7.52717	5.1852e-14	2.88042e-12
Cdkn2b	55.3127	-3.45146	0.45928	-7.51494	5.69367e-14	3.15254e-12
Prpf8	3126.12	0.680113	0.090653	7.50238	6.26715e-14	3.45878e-12
Pla2g12b	1059.55	-0.866952	0.115657	-7.4959	6.58465e-14	3.6222e-12
Hebp2	115.309	-2.29696	0.306636	-7.49084	6.84335e-14	3.75233e-12
Xylb	6390.82	0.900813	0.120321	7.48675	7.06e-14	3.85863e-12
Car9	77.6815	-3.00342	0.40125	-7.48517	7.14563e-14	3.89287e-12
Grn	3327.37	-0.723627	0.0966901	-7.48398	7.21049e-14	3.91562e-12
Ccdc120	112.497	-2.19507	0.293337	-7.48309	7.25943e-14	3.9296e-12
Lrig1	258.857	1.05865	0.141497	7.48177	7.3328e-14	3.95668e-12
Plekhb1	793.176	1.61958	0.217063	7.46136	8.56329e-14	4.60596e-12
Sdc2	10766.6	0.825655	0.110708	7.45794	8.78863e-14	4.71221e-12
Pa2g4	1258.81	0.843694	0.11314	7.45709	8.84518e-14	4.72757e-12
Aldh8a1	11818.4	0.812876	0.109045	7.4545	9.0212e-14	4.80648e-12
Gng10	834.466	-0.992019	0.133288	-7.44268	9.86664e-14	5.24046e-12
Gsta2	2674.91	1.56113	0.209863	7.4388	1.01603e-13	5.37955e-12
C9	25163	-1.48406	0.199548	-7.43714	1.02888e-13	5.43061e-12
Stard13	815.83	1.35246	0.181944	7.43336	1.05876e-13	5.57098e-12
Tmem98	981.01	-1.28898	0.173541	-7.42756	1.10616e-13	5.80237e-12
Agxt2	3454.54	1.25145	0.168577	7.42361	1.13974e-13	5.96007e-12
Lzts1	20.5369	3.98075	0.536359	7.42181	1.15528e-13	6.02272e-12
Slc13a3	1922.39	1.98894	0.268008	7.42121	1.16055e-13	6.03164e-12
Il1a	149.649	1.74665	0.23591	7.40386	1.32284e-13	6.85408e-12
Akap5	88.1352	2.58143	0.348725	7.40248	1.33664e-13	6.88349e-12
Cmtr1	1175.73	0.608495	0.082199	7.40271	1.33432e-13	6.88349e-12
Marco	4842.43	-1.76722	0.238994	-7.3944	1.42051e-13	7.29327e-12
Leap2	549.902	1.44687	0.19577	7.39065	1.4611e-13	7.47896e-12
St6galnac4	452.363	-2.07687	0.281039	-7.38997	1.46863e-13	7.49386e-12
Aqp5	161.113	-2.6405	0.357327	-7.38959	1.47285e-13	7.49386e-12
LOC103694328	213.355	1.36058	0.18414	7.38885	1.48102e-13	7.51288e-12
Plce1	459.917	-0.994329	0.13458	-7.38838	1.48633e-13	7.51727e-12
Pnkd	4183.57	1.34033	0.181598	7.38076	1.57384e-13	7.93618e-12
Prss36	180.731	-1.99328	0.270133	-7.37887	1.59636e-13	8.02583e-12
Itgae	144.625	-1.63533	0.221672	-7.37725	1.61587e-13	8.09989e-12
Myadm	1293.25	-1.08002	0.14645	-7.37468	1.64738e-13	8.23352e-12
Rnf5	1347.34	1.05465	0.143049	7.37269	1.67219e-13	8.33293e-12
Them6	211.104	-1.59808	0.217561	-7.34543	2.05106e-13	1.01909e-11
Enpp3	1219.3	1.23005	0.167475	7.34469	2.06232e-13	1.02169e-11
Csrp2	408.175	1.3119	0.178858	7.33485	2.21976e-13	1.09648e-11
Itih4	105923	-1.02687	0.140016	-7.33393	2.23492e-13	1.10076e-11
Gngt2	211.963	-1.5269	0.208247	-7.33216	2.26477e-13	1.11223e-11
Rasl12	31.1962	-3.63598	0.496424	-7.32434	2.40086e-13	1.17566e-11
LOC103694855	204.931	-2.29615	0.313557	-7.3229	2.42667e-13	1.18487e-11
Gpam	1709.8	1.3369	0.182618	7.32078	2.46528e-13	1.20026e-11
Icam1	849.39	-1.07323	0.146783	-7.31168	2.63829e-13	1.28082e-11
Tgfb2	130.455	-1.98897	0.272393	-7.30184	2.83864e-13	1.37414e-11
Amacr	5032.66	1.46432	0.200656	7.29766	2.92819e-13	1.41346e-11
Efemp2	183.002	-1.5603	0.213913	-7.29409	3.00694e-13	1.44735e-11
AY172581.10	47.2591	6.53336	0.896369	7.28869	3.12987e-13	1.50225e-11
Itga3	162.766	-2.0296	0.278831	-7.27895	3.36423e-13	1.61017e-11
Tex2	1780.79	1.10564	0.151999	7.27401	3.48964e-13	1.66549e-11
Rnaseh2a	497.733	-1.21205	0.166826	-7.26536	3.72053e-13	1.7707e-11
Kifc3	585.536	-1.30512	0.179824	-7.25777	3.93535e-13	1.86769e-11
Vegfa	6664.17	0.848625	0.117346	7.23182	4.76558e-13	2.2554e-11
Havcr1	20.8256	-4.39437	0.608458	-7.22214	5.11769e-13	2.40777e-11
Krt19	218.682	-2.45958	0.340547	-7.22245	5.10574e-13	2.40777e-11
RGD621098	281.669	1.22821	0.17007	7.22181	5.13017e-13	2.40777e-11
Sctr	85.5481	-2.38959	0.331109	-7.21694	5.31694e-13	2.48854e-11
Npm3	150.828	-1.32604	0.183758	-7.21622	5.34517e-13	2.49486e-11
Clu	21904.9	-0.739	0.102454	-7.21302	5.47248e-13	2.54726e-11
Eif4g2	7448.99	0.719775	0.0998063	7.21172	5.5248e-13	2.56457e-11
Mrps21	783.83	0.985589	0.136857	7.20161	5.95054e-13	2.75465e-11
Trpm6	30.255	4.47204	0.621133	7.1998	6.0299e-13	2.78377e-11
Acot9	127.69	-1.57718	0.219248	-7.19361	6.31021e-13	2.90527e-11
Rhob	874.947	-1.25393	0.174321	-7.19323	6.3277e-13	2.90543e-11
Ralgps1	116.449	-1.53777	0.214057	-7.18394	6.7731e-13	3.09388e-11
Npc2	3197.88	-0.783631	0.109081	-7.18391	6.77466e-13	3.09388e-11
Ifi44	240.578	1.16325	0.162371	7.16415	7.82727e-13	3.56498e-11
AC121740.1	34.2104	8.84288	1.23463	7.1624	7.92791e-13	3.60114e-11
Prpf38b	1321.89	0.896116	0.125138	7.161	8.00919e-13	3.62834e-11
Tmbim1	156.139	-1.65905	0.231765	-7.15833	8.16679e-13	3.68987e-11
Bicc1	611.033	-1.62094	0.226748	-7.14863	8.76511e-13	3.94966e-11
Kmt2e	1240.66	0.856078	0.11982	7.14472	9.01777e-13	4.05274e-11
Serbp1	2695.12	0.739284	0.103647	7.1327	9.84192e-13	4.41142e-11
Itgb5	932.25	-0.86619	0.121461	-7.1314	9.93497e-13	4.44138e-11
Pitrm1	928.009	0.779703	0.109455	7.12349	1.05232e-12	4.69195e-11
Arnt	358.276	1.17455	0.164991	7.11888	1.08807e-12	4.83861e-11
Cyp2c22	26450.5	-1.43386	0.201495	-7.1161	1.11021e-12	4.92417e-11
Igh-6	37.9453	3.55919	0.500425	7.11233	1.14097e-12	5.04737e-11
AABR07044404.1	186.074	1.9743	0.277809	7.10667	1.18878e-12	5.24516e-11
Rpf1	345.47	0.803659	0.113211	7.09874	1.25897e-12	5.54044e-11
AABR07059168.2	217.106	1.23909	0.174703	7.09255	1.31661e-12	5.7791e-11
Fut4	118.316	-1.67113	0.235634	-7.09206	1.32126e-12	5.78453e-11
Cyba	409.084	-1.07348	0.151421	-7.08937	1.34725e-12	5.88312e-11
Rtel1	733.028	1.14911	0.162338	7.07851	1.45715e-12	6.33036e-11
Plat	275.093	-2.21838	0.313394	-7.07858	1.45639e-12	6.33036e-11
Stxbp1	132.604	-1.31863	0.186375	-7.07517	1.4927e-12	6.46825e-11
Cxcl6	29.2768	-5.59201	0.790542	-7.07364	1.50923e-12	6.52317e-11
Fabp7	8743.65	1.80549	0.255518	7.06598	1.59481e-12	6.87553e-11
Actn1	774.264	-0.842496	0.119363	-7.05825	1.68607e-12	7.25054e-11
RGD1310507	21285.6	-0.960647	0.136148	-7.05588	1.71516e-12	7.35695e-11
RGD1565367	71.1927	-2.89653	0.410835	-7.05035	1.78469e-12	7.63584e-11
Ubr5	1419.8	0.713088	0.101164	7.0488	1.80469e-12	7.702e-11
PVR	104.167	-1.76036	0.250032	-7.04055	1.91477e-12	8.15124e-11
Ccdc50	177.124	1.11645	0.158669	7.03633	1.97375e-12	8.38128e-11
Aif1	718.234	-1.06464	0.151401	-7.03194	2.03686e-12	8.62762e-11
Mt-co2	363757	1.3616	0.193674	7.0304	2.05941e-12	8.70137e-11
Slc16a2	3218.04	0.801735	0.114119	7.02541	2.13445e-12	8.99603e-11
Lypd8	80.2783	-9.00822	1.28254	-7.02373	2.16015e-12	9.08172e-11
LOC100911847	2458	-0.952658	0.135657	-7.02257	2.17819e-12	9.13491e-11
Acat1	6124	1.00292	0.142982	7.0143	2.31095e-12	9.66776e-11
Clk2	1863.35	0.690728	0.0985625	7.00802	2.41712e-12	1.0087e-10
Pde4c	73.837	-2.4134	0.344593	-7.00362	2.4944e-12	1.03839e-10
Pald1	1882.42	-1.52732	0.218212	-6.99926	2.57315e-12	1.06855e-10
C8b	11807.5	0.618288	0.0883932	6.99475	2.65726e-12	1.10078e-10
AABR07006310.1	1127.19	1.24008	0.177428	6.98922	2.76425e-12	1.13953e-10
Spice1	200.696	-1.39112	0.199038	-6.98922	2.7641e-12	1.13953e-10
Adh7	297.448	2.38551	0.341352	6.98841	2.78022e-12	1.14056e-10
LOC689574	3894.72	0.860283	0.1231	6.9885	2.77846e-12	1.14056e-10
Usp47	1909.9	0.638074	0.0914522	6.97713	3.01261e-12	1.23291e-10
Zfp207	1256.01	0.704336	0.100956	6.97664	3.02334e-12	1.23432e-10
Usp20	250.853	-1.40397	0.201386	-6.97151	3.13561e-12	1.27708e-10
Mgst1	51806.5	0.649237	0.0932396	6.96311	3.32853e-12	1.35241e-10
Ctsd	5981.7	-0.645265	0.0927115	-6.95992	3.40461e-12	1.37878e-10
Cpq	2491.81	0.807958	0.116091	6.95971	3.40972e-12	1.37878e-10
Tmem119	87.0716	-2.65082	0.380935	-6.95871	3.4341e-12	1.38533e-10
Fam214a	963.2	0.932718	0.134141	6.95327	3.56927e-12	1.43644e-10
Ccni	1665.32	-0.840356	0.120957	-6.94755	3.71679e-12	1.49226e-10
Crlf2	176.074	-1.31925	0.190168	-6.93726	3.9977e-12	1.60125e-10
LOC690045	56.7375	-2.22615	0.32126	-6.92945	4.22483e-12	1.68824e-10
AABR07070720.1	38.2166	2.846	0.410737	6.92901	4.23785e-12	1.68946e-10
Prg4	1825.04	1.98644	0.286738	6.92773	4.27632e-12	1.70079e-10
Aldh2	21729.7	0.687371	0.0992466	6.92589	4.33251e-12	1.71911e-10
Gpx2	136.304	-3.86868	0.558946	-6.92138	4.47253e-12	1.77052e-10
Scube3	30.1511	-3.07684	0.444605	-6.92038	4.50428e-12	1.77893e-10
Rbm47	289.914	1.19188	0.172288	6.91797	4.58164e-12	1.80109e-10
App	2936.19	-1.03614	0.149774	-6.91807	4.57827e-12	1.80109e-10
Wbp2	1065.85	1.0072	0.14561	6.9171	4.60973e-12	1.80793e-10
Serpinb9	585.353	-1.07068	0.154855	-6.91405	4.71006e-12	1.84301e-10
Cd99	628.432	-1.14357	0.165645	-6.90375	5.06459e-12	1.97718e-10
Nck2	212.888	-1.74219	0.252516	-6.89932	5.2253e-12	2.03523e-10
Slc22a15	104.674	-1.34128	0.19443	-6.89852	5.25478e-12	2.04201e-10
Itm2c	1310.05	-0.81456	0.118094	-6.89758	5.28973e-12	2.05089e-10
Trim35	301.1	-1.24237	0.180183	-6.89505	5.38468e-12	2.08294e-10
Prkx	173.999	-1.2361	0.179481	-6.88709	5.69457e-12	2.19779e-10
Thrap3	1971	0.883548	0.128394	6.88156	5.92013e-12	2.27965e-10
Sptan1	2510.97	-0.926791	0.135022	-6.86398	6.69701e-12	2.56714e-10
Plscr2	134.711	-1.43687	0.20933	-6.86414	6.68931e-12	2.56714e-10
Casp3	711.891	-0.702794	0.102495	-6.85684	7.0399e-12	2.69248e-10
Fbxl8	30.396	-2.70171	0.394069	-6.85593	7.08486e-12	2.70358e-10
Sorcs2	113.573	-2.0367	0.297216	-6.8526	7.25204e-12	2.76115e-10
RT1-A1	1145.65	-1.16263	0.169741	-6.84943	7.41449e-12	2.81668e-10
Adh1	41822	1.29335	0.188991	6.84348	7.72912e-12	2.92963e-10
Atg3	854.72	0.849526	0.124179	6.84117	7.85509e-12	2.97073e-10
Me2	135.179	-1.3838	0.202366	-6.83812	8.02401e-12	3.02786e-10
Ppig	973.602	1.14568	0.167556	6.83756	8.05517e-12	3.03286e-10
Ptafr	303.85	-1.11809	0.163633	-6.83295	8.31845e-12	3.12504e-10
Plcb1	199.191	1.20735	0.176714	6.83223	8.36033e-12	3.13383e-10
Samd4a	256.341	-1.20457	0.176351	-6.83055	8.45888e-12	3.16377e-10
Cxcl16	334.728	-1.45198	0.212659	-6.82777	8.62441e-12	3.21858e-10
Rab5b	2636.36	0.524701	0.0768666	6.82613	8.72363e-12	3.24845e-10
Cabp2	4338.84	1.56336	0.229064	6.82497	8.79424e-12	3.26756e-10
Dab1	222.634	1.79911	0.263831	6.8192	9.15496e-12	3.39415e-10
Gabrp	86.7994	-5.05764	0.741759	-6.81845	9.20311e-12	3.40455e-10
Adgrf5	1294.23	1.21712	0.178587	6.81524	9.41039e-12	3.47364e-10
Cdcp1	37.5083	-3.8467	0.564698	-6.81196	9.62765e-12	3.54611e-10
Ptpdc1	62.2407	1.74133	0.25565	6.81138	9.66698e-12	3.55288e-10
Ckb	438.21	-1.14029	0.167426	-6.81072	9.71118e-12	3.5614e-10
Rnf43	269.272	1.66706	0.24483	6.80905	9.82447e-12	3.59516e-10
Acer2	953.654	-1.59201	0.233912	-6.80602	1.00336e-11	3.66376e-10
Abcb4	4222.76	-1.12768	0.165772	-6.80262	1.02735e-11	3.74332e-10
Pnpla5	329.897	-4.86392	0.715564	-6.79733	1.06575e-11	3.87488e-10
Cebpz	568.89	0.615174	0.0905558	6.79331	1.09588e-11	3.97592e-10
Irs1	296.029	1.35897	0.200195	6.78825	1.13499e-11	4.109e-10
Iyd	1752.67	0.982022	0.144713	6.78602	1.15271e-11	4.16425e-10
Vhl	236.784	-0.979747	0.144611	-6.77507	1.24344e-11	4.48246e-10
S100a16	790.688	-1.01816	0.150659	-6.758	1.3991e-11	5.0329e-10
Cygb	384.708	-1.51181	0.223843	-6.75389	1.43934e-11	5.16667e-10
Crip1	300.854	-1.32132	0.195701	-6.75174	1.46081e-11	5.23268e-10
Catsperg	201.399	-1.3422	0.198815	-6.751	1.46834e-11	5.24855e-10
AC114233.2	311.574	-1.46232	0.21672	-6.74748	1.50437e-11	5.366e-10
Cdh17	154.094	-3.70718	0.549468	-6.74685	1.51089e-11	5.37793e-10
Slc13a4	1735.21	2.8746	0.42635	6.74235	1.55847e-11	5.53566e-10
Grik5	112.356	-1.91411	0.284097	-6.73753	1.61103e-11	5.71039e-10
Hps1	300.612	-1.45725	0.216357	-6.73542	1.63457e-11	5.78174e-10
Zfp955a	84.7613	-1.76503	0.262155	-6.73276	1.66471e-11	5.87609e-10
Cecr2	157.989	1.30818	0.19446	6.72724	1.72915e-11	6.09085e-10
Tmem184b	530.758	-0.828604	0.123193	-6.72609	1.74287e-11	6.12644e-10
Tes	195.512	-1.99798	0.297455	-6.71691	1.8562e-11	6.51129e-10
Arhgef15	246.129	1.02179	0.152191	6.71389	1.89503e-11	6.63377e-10
Brd4	1575.55	0.866201	0.129101	6.7095	1.95295e-11	6.82244e-10
Stap2	420.439	-0.955369	0.142462	-6.70614	1.99838e-11	6.9668e-10
Msl1	795.184	0.624829	0.0933709	6.6919	2.20285e-11	7.66384e-10
Arpc4	1279.89	-0.605643	0.0905746	-6.68668	2.28295e-11	7.92624e-10
Tubb6	353.573	-1.38132	0.206611	-6.68561	2.29971e-11	7.95185e-10
RT1-CE7	685.444	-1.07438	0.160694	-6.6859	2.29509e-11	7.95185e-10
Cpb1	59.4709	-4.20181	0.628742	-6.68288	2.34284e-11	8.08448e-10
LOC103689996	53.8128	-2.02527	0.303358	-6.67617	2.45259e-11	8.446e-10
Itgb6	57.6096	-3.08514	0.462382	-6.67226	2.51885e-11	8.65658e-10
Anxa3	1246.81	-0.78236	0.117273	-6.67124	2.53643e-11	8.69933e-10
Cenpv	326.003	0.90002	0.134985	6.66756	2.60099e-11	8.90274e-10
Tpm1	2242.04	-1.06582	0.160033	-6.65998	2.73866e-11	9.35507e-10
Bclaf1	1223.85	0.866999	0.130186	6.65968	2.74426e-11	9.35532e-10
Psen2	815.3	-0.823846	0.123754	-6.65713	2.79232e-11	9.50006e-10
Fip1l1	568.041	1.25623	0.188776	6.65461	2.84049e-11	9.64456e-10
Nudt18	397.75	-1.03829	0.156059	-6.65319	2.86815e-11	9.719e-10
Ywhae	5569.05	0.50783	0.0763601	6.65046	2.9218e-11	9.88104e-10
Ak2	5603.82	0.902389	0.135787	6.6456	3.01993e-11	1.01925e-09
Cd276	754.886	-1.45288	0.218769	-6.64117	3.11198e-11	1.04755e-09
Myo7b	861.774	-2.05592	0.309581	-6.64098	3.11614e-11	1.04755e-09
H2afz	708.336	-1.3292	0.200207	-6.6391	3.15609e-11	1.05888e-09
Clstn1	347.48	-1.23573	0.186184	-6.63717	3.19753e-11	1.07067e-09
Clcf1	77.3583	-1.91935	0.289658	-6.62629	3.44239e-11	1.15038e-09
Rab32	398.638	-1.02779	0.155144	-6.62476	3.47807e-11	1.16002e-09
Klf6	151.762	-1.42435	0.215079	-6.62244	3.53316e-11	1.17608e-09
Il7	22.176	-2.74226	0.414154	-6.62135	3.55923e-11	1.18233e-09
Mybph	76.0772	-2.58669	0.390675	-6.62108	3.56591e-11	1.18233e-09
Rps27l	814.776	-1.10269	0.166593	-6.6191	3.61393e-11	1.19591e-09
S100a11	466.367	-1.76454	0.266681	-6.61666	3.67405e-11	1.21344e-09
Fmo1	2256.11	2.43989	0.36897	6.61271	3.77358e-11	1.24389e-09
Snx3	2784.42	0.63483	0.0960361	6.61033	3.83458e-11	1.26154e-09
Sgpp2	60.405	-3.03476	0.459238	-6.60825	3.88902e-11	1.27697e-09
Ldhd	559.139	-1.12881	0.170829	-6.60786	3.89928e-11	1.27786e-09
RGD1564804	406.9	-1.25635	0.190318	-6.60131	4.07538e-11	1.33299e-09
Pnisr	1019.62	0.865573	0.13114	6.60038	4.10101e-11	1.33879e-09
Ucp2	1116.3	-0.781166	0.118404	-6.59748	4.18199e-11	1.36261e-09
Anxa13	194.15	-1.81154	0.27466	-6.59559	4.23563e-11	1.37517e-09
Itgb1	3252.79	-0.746193	0.113136	-6.59555	4.23679e-11	1.37517e-09
Max	751.244	0.788498	0.119654	6.58983	4.40341e-11	1.42652e-09
Egfr	960.812	1.13756	0.172703	6.58677	4.49484e-11	1.45336e-09
Hexim1	743.384	0.921563	0.13993	6.58591	4.52108e-11	1.45906e-09
Dab2ip	1183.16	0.718773	0.109144	6.58554	4.53225e-11	1.45988e-09
Cth	11058.2	1.52785	0.232578	6.56919	5.05883e-11	1.62333e-09
Ctla2a	214.656	-1.2226	0.186106	-6.5694	5.05172e-11	1.62333e-09
Ttll9	134.764	-2.77567	0.422737	-6.56596	5.16991e-11	1.65584e-09
Alas2	462.131	-2.10601	0.320999	-6.56079	5.35223e-11	1.711e-09
Slc39a5	994.188	1.25388	0.191146	6.55983	5.387e-11	1.71887e-09
Papss2	3607.39	0.946115	0.14427	6.55794	5.45568e-11	1.73751e-09
Aox2	93.0036	3.18004	0.485084	6.55566	5.53954e-11	1.76091e-09
Ifngr1	1276.47	-0.938922	0.143237	-6.55503	5.56291e-11	1.76503e-09
Slc37a2	158.118	1.41805	0.216399	6.55295	5.64121e-11	1.78652e-09
Mt-nd4l	10351.7	1.39915	0.213533	6.55239	5.66232e-11	1.78986e-09
Bms1	507.554	0.661285	0.100942	6.55117	5.70893e-11	1.80124e-09
Mycl	86.8082	-1.78114	0.272114	-6.54557	5.92672e-11	1.86648e-09
Cyp1b1	57.1178	-4.04791	0.618563	-6.54405	5.98747e-11	1.88211e-09
Nr2f2	498.413	1.06303	0.162462	6.54324	6.0202e-11	1.88889e-09
Adam8	41.8654	-2.70922	0.414505	-6.53603	6.31737e-11	1.97118e-09
Clec4f	4464.96	-0.685587	0.104886	-6.53649	6.29803e-11	1.97118e-09
Cdk12	429.884	0.825066	0.126229	6.53628	6.30668e-11	1.97118e-09
Iqgap2	2369.38	1.12817	0.17273	6.53143	6.51468e-11	2.02529e-09
Rnd3	761.779	0.974574	0.149212	6.53148	6.51234e-11	2.02529e-09
Lgmn	2043.56	-0.901741	0.138139	-6.52779	6.67462e-11	2.07121e-09
Pdzk1	1197.93	0.793367	0.121557	6.52669	6.72409e-11	2.08275e-09
Wnt7a	37.7595	-3.68605	0.564798	-6.52632	6.74058e-11	2.08404e-09
Lipo1	136.309	1.68751	0.258707	6.52289	6.89673e-11	2.12844e-09
Nxpe1	157.958	1.26958	0.194834	6.51619	7.21133e-11	2.22148e-09
Prdx2	1751.45	-0.662436	0.101705	-6.51334	7.34989e-11	2.26006e-09
Gata4	744.636	0.982193	0.150925	6.5078	7.62581e-11	2.34065e-09
Hectd2	132.513	1.29048	0.198334	6.50662	7.6859e-11	2.35483e-09
Adamtsl2	517.912	-1.42952	0.219783	-6.50425	7.80802e-11	2.38363e-09
Spp1	548.614	-3.01036	0.462826	-6.5043	7.80582e-11	2.38363e-09
Txndc12	1270.88	0.682596	0.10504	6.49845	8.11539e-11	2.47301e-09
Apc	530.461	1.00537	0.154749	6.49676	8.2066e-11	2.49631e-09
Scn1b	176.842	-1.83622	0.282768	-6.49374	8.37338e-11	2.54248e-09
LOC685431	60.7623	-2.02105	0.311404	-6.49014	8.57552e-11	2.5992e-09
Faap20	129.376	-1.35462	0.208729	-6.48986	8.59141e-11	2.59936e-09
Cdc42ep1	1004.69	-1.23571	0.19048	-6.48736	8.73536e-11	2.6382e-09
Tab2	1326.34	0.800717	0.123435	6.48693	8.76019e-11	2.64099e-09
Tbxas1	72.456	-1.38266	0.213191	-6.48553	8.84224e-11	2.661e-09
Scd2	1463.61	-3.01333	0.465015	-6.48008	9.16714e-11	2.75388e-09
Slc25a13	1100.87	0.984931	0.152054	6.47752	9.32432e-11	2.79614e-09
Lin7a	45.5532	2.0148	0.311105	6.47628	9.40124e-11	2.81423e-09
Trappc3	706.113	-0.819686	0.126585	-6.47538	9.45747e-11	2.82607e-09
Dok2	107.524	-1.21161	0.187301	-6.46878	9.87975e-11	2.94705e-09
Ppp1r14b	529.322	-0.966555	0.149564	-6.46248	1.03003e-10	3.0671e-09
Mrps9	904.694	0.703323	0.108858	6.46093	1.0406e-10	3.09313e-09
AABR07003235.1	18.2951	-3.59993	0.557791	-6.45391	1.09004e-10	3.23441e-09
Serinc2	43.848	-3.95415	0.61281	-6.45249	1.1003e-10	3.25915e-09
Mt-cyb	302408	1.00819	0.15626	6.45199	1.10387e-10	3.26403e-09
Magi1	507.295	0.843176	0.130747	6.4489	1.12662e-10	3.3255e-09
Mtch1	1435.81	-0.711611	0.110383	-6.44672	1.14298e-10	3.3679e-09
Cyp2b2	2952.84	2.79722	0.434407	6.43919	1.20115e-10	3.53318e-09
Hip1	515.852	-0.701582	0.108966	-6.43853	1.20639e-10	3.54245e-09
Nudt12	410.679	0.891132	0.138418	6.43797	1.21086e-10	3.54941e-09
Blk	63.6428	-1.95565	0.303796	-6.43738	1.21554e-10	3.55699e-09
Cd47	951.203	-0.941006	0.146186	-6.43704	1.21826e-10	3.55878e-09
LOC100174910	246.759	-1.05059	0.163397	-6.4297	1.27858e-10	3.72856e-09
Mrvi1	201.659	1.0376	0.161439	6.42718	1.2999e-10	3.78422e-09
Ccl9	14727.3	-0.848916	0.132142	-6.42425	1.32521e-10	3.85129e-09
Wnt9b	61.8128	-2.21403	0.345164	-6.41443	1.41354e-10	4.10097e-09
Gpbp1l1	399.269	1.02357	0.159605	6.41315	1.42543e-10	4.1284e-09
Psmb9	686.888	-1.16276	0.181452	-6.40808	1.47364e-10	4.26074e-09
Setd1b	431.554	1.11129	0.173435	6.40755	1.47875e-10	4.26821e-09
Nsmf	786.389	-1.14556	0.178822	-6.40614	1.49252e-10	4.30064e-09
Rbbp6	861.302	0.91914	0.14369	6.39671	1.58765e-10	4.56566e-09
Grhl2	43.4026	-1.84202	0.287974	-6.39649	1.58988e-10	4.56566e-09
LOC689065	24.7778	-3.00201	0.469358	-6.396	1.59505e-10	4.57273e-09
Fgl2	381.18	-1.02826	0.160773	-6.39573	1.59784e-10	4.57299e-09
Slc25a24	174.098	-1.62167	0.253767	-6.3904	1.65452e-10	4.72723e-09
LOC100360828	612.734	-0.766089	0.119912	-6.38876	1.67236e-10	4.76214e-09
Mospd3	1559.83	0.90397	0.141489	6.38896	1.67013e-10	4.76214e-09
Itpk1	186.123	1.31136	0.20537	6.38537	1.70983e-10	4.86068e-09
Taok3	403.371	1.03296	0.161854	6.38208	1.747e-10	4.95804e-09
Ubr3	574.335	1.01796	0.159513	6.38171	1.75116e-10	4.96153e-09
Pdlim4	82.37	-2.04649	0.320825	-6.37882	1.78458e-10	5.04778e-09
Arhgef2	421.143	-0.862292	0.13526	-6.37507	1.82878e-10	5.16418e-09
Inhba	121.122	1.69377	0.265852	6.37109	1.87685e-10	5.29109e-09
Syt1	16.8443	-7.9343	1.24556	-6.37006	1.8896e-10	5.31818e-09
Supt6h	1472.28	0.570168	0.089544	6.36747	1.92177e-10	5.39977e-09
Gpt	1459.08	2.58678	0.406573	6.36241	1.98613e-10	5.56214e-09
Pla2g7	54.3412	-2.9359	0.461434	-6.36256	1.98416e-10	5.56214e-09
Sec22b	1171.95	-0.776527	0.12209	-6.36031	2.01351e-10	5.62951e-09
Tank	262.859	0.969487	0.152444	6.35961	2.02265e-10	5.64575e-09
Tut4	805.721	1.18569	0.18648	6.35829	2.04013e-10	5.68518e-09
RGD1311595	443.512	1.35643	0.213744	6.34606	2.20897e-10	6.13551e-09
Slc12a4	670.081	-0.76178	0.12004	-6.34608	2.20875e-10	6.13551e-09
RGD1565033	203.47	-1.35076	0.212964	-6.3427	2.25779e-10	6.26083e-09
Ano1	145.568	-1.80894	0.285472	-6.33667	2.34778e-10	6.49975e-09
Cp	41337.7	-1.2896	0.203541	-6.33581	2.36105e-10	6.5152e-09
Jade2	147.028	1.24267	0.196132	6.33588	2.35994e-10	6.5152e-09
Map2	118.96	-2.26871	0.358268	-6.33243	2.41325e-10	6.6484e-09
Ston2	64.1359	1.7368	0.274589	6.3251	2.53063e-10	6.96047e-09
Hnrnpul1	1925.31	0.564726	0.0893637	6.31941	2.62561e-10	7.21001e-09
Srcap	1584.56	0.7515	0.118925	6.31909	2.63112e-10	7.21251e-09
AABR07054368.1	993.025	-1.19845	0.189662	-6.31886	2.63504e-10	7.21251e-09
Lgals3	743.556	-1.60815	0.254543	-6.31778	2.65343e-10	7.25115e-09
Pglyrp2	4175.63	-0.757294	0.11993	-6.31445	2.71132e-10	7.39741e-09
RGD1561149	454.463	-1.45945	0.231142	-6.31409	2.71749e-10	7.40233e-09
Ttpa	2518.52	1.07311	0.17006	6.3102	2.78677e-10	7.56672e-09
Dnaja1	4083.03	0.788042	0.124882	6.31031	2.78477e-10	7.56672e-09
Huwe1	1648.49	0.606171	0.0961115	6.30696	2.84571e-10	7.71438e-09
Tet2	238.31	1.16225	0.184301	6.30627	2.85844e-10	7.72424e-09
Csrp1	2746.45	-0.78102	0.123848	-6.30627	2.85847e-10	7.72424e-09
Rflnb	33.515	-3.05732	0.484982	-6.30398	2.90105e-10	7.82684e-09
Myrip	53.1812	-2.12465	0.337197	-6.30093	2.95867e-10	7.9696e-09
Hsf4	37.5942	-2.28173	0.362185	-6.29989	2.97866e-10	8.01071e-09
Cib1	733.865	-0.630824	0.100156	-6.2984	3.00743e-10	8.07526e-09
Tbx3	136.731	1.62006	0.257311	6.29614	3.05155e-10	8.18077e-09
Xpnpep2	2842.4	1.12253	0.178376	6.29303	3.11319e-10	8.33282e-09
Heyl	266.242	-1.51744	0.241153	-6.29247	3.12458e-10	8.34797e-09
Tbc1d8	483.775	-0.827104	0.131448	-6.29226	3.1287e-10	8.34797e-09
Cadm4	51.0398	1.77383	0.282029	6.28953	3.18438e-10	8.48316e-09
Prkab1	2247.37	0.974427	0.155038	6.28507	3.27711e-10	8.71649e-09
AC109891.1	488.53	1.30005	0.206918	6.28294	3.32231e-10	8.82286e-09
Minos1	755.579	-0.775376	0.123474	-6.27965	3.39332e-10	8.99734e-09
Ubxn4	2116.9	0.665915	0.106088	6.277	3.45165e-10	9.1377e-09
A1cf	1132.6	1.22344	0.195167	6.26872	3.64039e-10	9.62234e-09
Tmem163	43.5003	-1.77144	0.282693	-6.26631	3.69694e-10	9.75658e-09
Cblc	33.9449	-3.37367	0.53857	-6.26412	3.74935e-10	9.8795e-09
Syk	317.822	-1.23785	0.197635	-6.2633	3.76912e-10	9.91618e-09
Slc2a2	5078.58	-0.984323	0.1572	-6.26162	3.8101e-10	1.00084e-08
Cyfip2	734.51	1.19945	0.191582	6.26075	3.83124e-10	1.00484e-08
Gde1	626.883	-0.96028	0.153398	-6.26007	3.84802e-10	1.00768e-08
Rmdn2	1682.02	1.35042	0.216019	6.25138	4.06841e-10	1.06375e-08
March2	2522.74	-0.863468	0.138228	-6.24668	4.19267e-10	1.09455e-08
Psenen	1415.71	0.591964	0.0947849	6.24534	4.22889e-10	1.10231e-08
Mafk	311.158	-0.975941	0.156288	-6.24452	4.25095e-10	1.10636e-08
Gc	150365	0.570716	0.0913994	6.24419	4.25999e-10	1.10701e-08
Set	1277.74	0.818006	0.131154	6.237	4.46029e-10	1.15651e-08
Hba-a3	538.07	-2.06714	0.331438	-6.23687	4.46413e-10	1.15651e-08
R3hdm2	2607.22	0.616564	0.0989031	6.23402	4.54617e-10	1.17597e-08
Chp1	1546.23	0.910623	0.146092	6.23321	4.56971e-10	1.18025e-08
Pdzd8	494.8	0.825818	0.132498	6.23269	4.58481e-10	1.18235e-08
Fgd6	78.8871	-1.79153	0.287454	-6.2324	4.59353e-10	1.1828e-08
Rhoc	637.379	-1.14717	0.184073	-6.23216	4.60058e-10	1.18282e-08
Erg	175.473	1.16044	0.186266	6.23001	4.66411e-10	1.19733e-08
Itgb1bp1	301.287	-0.808954	0.13	-6.22274	4.88548e-10	1.25226e-08
Ccdc146	149.364	2.01447	0.323828	6.22079	4.94659e-10	1.2641e-08
Cotl1	817.959	-0.760004	0.122172	-6.22079	4.9465e-10	1.2641e-08
AABR07005844.1	539.783	-3.27208	0.526489	-6.2149	5.13569e-10	1.31045e-08
Oca2	56.8683	2.77012	0.446412	6.2053	5.45931e-10	1.38884e-08
Fnbp4	1113.87	0.892038	0.143753	6.20534	5.45792e-10	1.38884e-08
Cd5l	4617.34	-1.14549	0.184787	-6.19898	5.68291e-10	1.44356e-08
Pkm	288.993	-1.11708	0.180351	-6.19389	5.86986e-10	1.48882e-08
C4a	408.368	-1.16628	0.188324	-6.19293	5.9056e-10	1.49565e-08
AABR07052458.1	27.9315	3.96392	0.640232	6.19138	5.9641e-10	1.5082e-08
Prdm6	36.124	2.12079	0.342692	6.18861	6.06979e-10	1.53264e-08
Fam222b	753.816	1.02566	0.16574	6.18836	6.07945e-10	1.5328e-08
Eif4enif1	300.628	0.9632	0.155714	6.18569	6.18324e-10	1.55665e-08
Nfx1	1130.78	0.620632	0.100429	6.17983	6.41721e-10	1.61316e-08
LOC500712	150838	-1.10676	0.179201	-6.17609	6.5708e-10	1.64932e-08
Dock5	276.116	1.10001	0.178145	6.17483	6.62349e-10	1.66008e-08
Foxo1	274.33	0.979562	0.158659	6.17402	6.65754e-10	1.66615e-08
Serf2	3687.16	-0.754674	0.122242	-6.17361	6.67473e-10	1.66799e-08
Dzip1l	77.1573	-1.95756	0.317331	-6.16881	6.88056e-10	1.7169e-08
Cela1	1030.74	1.2918	0.209426	6.16827	6.90392e-10	1.72019e-08
Smc6	978.774	0.803321	0.130255	6.16728	6.94729e-10	1.72846e-08
Ssbp3	522.105	0.888961	0.14433	6.15923	7.31001e-10	1.81603e-08
Acsm3	678.235	2.378	0.38619	6.15759	7.38581e-10	1.83218e-08
Arhgef9	110.574	-1.50211	0.24415	-6.15242	7.63083e-10	1.89019e-08
Myct1	56.1821	1.8341	0.29824	6.14975	7.76042e-10	1.91948e-08
AABR07057423.1	20.0922	-3.00991	0.489908	-6.14383	8.05574e-10	1.98963e-08
Map1lc3a	610.94	-1.11432	0.181484	-6.14005	8.2495e-10	2.03452e-08
Spty2d1	126.473	1.28285	0.209033	6.13708	8.40517e-10	2.06989e-08
Apcdd1	136.429	2.20824	0.359895	6.1358	8.47337e-10	2.08366e-08
Bod1l1	262.943	0.940181	0.153283	6.13364	8.58884e-10	2.109e-08
Tpr	1133.8	0.654641	0.106747	6.13262	8.64445e-10	2.11958e-08
Ifngr2	543.661	-0.910565	0.148582	-6.12838	8.87789e-10	2.17367e-08
Car3	12367.9	5.13039	0.837186	6.12813	8.89163e-10	2.17389e-08
Hao2	2309.08	1.74444	0.284704	6.12718	8.9448e-10	2.18374e-08
S100a6	279.015	-2.2645	0.369834	-6.12302	9.18191e-10	2.2384e-08
Ube2r2	2363.1	0.647898	0.105844	6.12128	9.28284e-10	2.25976e-08
Ikbke	581.518	-1.03659	0.169377	-6.11998	9.35874e-10	2.27497e-08
Gstz1	14035.3	0.884829	0.144707	6.11463	9.67835e-10	2.34929e-08
Rnf167	1599.87	0.639514	0.104735	6.10603	1.0214e-09	2.47577e-08
Hpd	55013.5	1.54017	0.252465	6.1005	1.05735e-09	2.55924e-08
Anxa4	1062.05	-1.09752	0.179937	-6.09949	1.06406e-09	2.5718e-08
Rras	490.388	-0.835447	0.137014	-6.09753	1.07722e-09	2.59992e-08
Pik3cd	283.125	-1.03172	0.169302	-6.09399	1.10133e-09	2.65432e-08
Spink1l	748.154	-4.63826	0.761367	-6.09201	1.11499e-09	2.68342e-08
Tlr1	56.3661	-1.80076	0.295762	-6.08855	1.13939e-09	2.73825e-08
Card14	61.559	-2.37952	0.391324	-6.0807	1.19663e-09	2.87173e-08
Mt-nd5	119081	1.32203	0.217429	6.08026	1.19986e-09	2.87542e-08
Casp4	191.324	-1.30993	0.215477	-6.07921	1.20778e-09	2.89032e-08
Hnrnph2	766.995	0.767324	0.126245	6.07805	1.21656e-09	2.90722e-08
Gfra3	686.142	-1.64986	0.271683	-6.07274	1.25745e-09	3.0007e-08
Eif3j	671.158	0.734096	0.120927	6.07058	1.27452e-09	3.03716e-08
Nt5e	1711.82	0.72809	0.119955	6.0697	1.28146e-09	3.04941e-08
Akap8l	1428.84	0.966253	0.159325	6.06465	1.3224e-09	3.14242e-08
Acadvl	6650.8	0.706291	0.116585	6.05817	1.37679e-09	3.26709e-08
Mal	40.9997	-2.20501	0.364753	-6.0452	1.49221e-09	3.53603e-08
Avpi1	269.002	-1.108	0.183368	-6.04248	1.51764e-09	3.59124e-08
Sel1l	3605.85	0.635707	0.105248	6.04009	1.5403e-09	3.63979e-08
Ddx27	487.701	0.716455	0.118652	6.03831	1.55739e-09	3.67506e-08
Krt20	199.075	-3.30494	0.547362	-6.03794	1.56093e-09	3.67828e-08
N4bp2	245.87	1.25764	0.208638	6.02788	1.66126e-09	3.90928e-08
Ivd	2629.03	0.644432	0.106918	6.02733	1.66692e-09	3.91715e-08
Azgp1	23263.4	0.729723	0.121228	6.01944	1.75016e-09	4.10707e-08
Setd1a	926.253	0.828449	0.13766	6.01806	1.76519e-09	4.1366e-08
Axin2	274.839	1.83346	0.30471	6.01707	1.77607e-09	4.15634e-08
Nme2	3485.04	-0.611585	0.101667	-6.0156	1.79218e-09	4.18826e-08
AABR07059807.1	22.3531	7.88351	1.31212	6.0082	1.87594e-09	4.37796e-08
Pld3	1109.28	-0.826647	0.137623	-6.00661	1.89442e-09	4.415e-08
Twnk	640.304	0.793006	0.13211	6.00264	1.94139e-09	4.51825e-08
Cenpb	886.186	-0.623669	0.103948	-5.99979	1.97567e-09	4.59174e-08
Dnajc8	818.945	0.824981	0.13756	5.99724	2.00698e-09	4.65811e-08
Mitd1	154.999	1.04285	0.173953	5.99502	2.03459e-09	4.71574e-08
Hnrnpm	1514.63	0.640716	0.106922	5.99238	2.06795e-09	4.77999e-08
Narf	731.483	0.774263	0.129205	5.99253	2.06603e-09	4.77999e-08
Ankrd13a	1651.7	0.484145	0.0808149	5.99079	2.08827e-09	4.82037e-08
Hfe	661.707	-1.10556	0.184626	-5.9881	2.12301e-09	4.89389e-08
Dpy19l3	3655.24	-0.714847	0.119424	-5.98581	2.15316e-09	4.95667e-08
Slc7a4	27.5276	-2.52551	0.422575	-5.97647	2.28025e-09	5.2421e-08
Esf1	314.132	0.845187	0.14153	5.97178	2.34683e-09	5.38786e-08
Dmgdh	6871.08	0.857748	0.143715	5.9684	2.39591e-09	5.49309e-08
Anxa7	352.551	-1.2012	0.201419	-5.96369	2.46602e-09	5.64619e-08
Cerk	612.968	-0.591142	0.0991429	-5.96252	2.48381e-09	5.67924e-08
Actn4	4635.68	0.594749	0.0997569	5.96198	2.49192e-09	5.68308e-08
Jcad	761.262	1.085	0.181988	5.96197	2.4922e-09	5.68308e-08
Ifi27l2b	3784.76	-1.71559	0.28777	-5.96169	2.4964e-09	5.685e-08
Edil3	188.781	-4.17443	0.700248	-5.96136	2.50151e-09	5.689e-08
AABR07005821.1	680.821	-3.28197	0.550736	-5.95925	2.53394e-09	5.75503e-08
AY172581.20	472.236	2.90331	0.487693	5.95315	2.6303e-09	5.96588e-08
Scamp2	820.457	-0.60112	0.100979	-5.95291	2.6342e-09	5.96675e-08
Reep5	1461.19	-0.965337	0.162262	-5.94924	2.69389e-09	6.09381e-08
Atp6v0e2	338.033	-0.911925	0.153323	-5.94773	2.71889e-09	6.14215e-08
Med13	460.266	0.944871	0.158917	5.9457	2.75281e-09	6.2105e-08
Zfp775	282.181	-1.32855	0.223499	-5.94434	2.7758e-09	6.25404e-08
Mt-atp6	500058	1.28223	0.215745	5.94327	2.7939e-09	6.28646e-08
Ubqln1	3071.61	0.602225	0.101342	5.94253	2.80665e-09	6.30677e-08
Ror2	55.9088	2.83763	0.477616	5.94123	2.82889e-09	6.34833e-08
Znrf1	338.475	-0.773439	0.130194	-5.94068	2.83838e-09	6.3612e-08
Wdtc1	1357.31	0.660377	0.111295	5.93359	2.96378e-09	6.63346e-08
Lpin2	1304.47	-1.25422	0.211709	-5.92424	3.13744e-09	7.01288e-08
Col4a5	326.138	-1.35706	0.229108	-5.92321	3.1571e-09	7.04754e-08
Pkia	36.9322	-2.22427	0.375576	-5.92229	3.1748e-09	7.07771e-08
Fam110a	131.827	-1.36816	0.231362	-5.91351	3.34891e-09	7.45607e-08
Tradd	180.873	-1.18835	0.201005	-5.91201	3.37953e-09	7.51435e-08
AABR07040847.1	22.6159	-3.39057	0.573708	-5.90993	3.42248e-09	7.58994e-08
Zbed5	490.351	-1.4881	0.251796	-5.90996	3.42184e-09	7.58994e-08
Akt2	1626.54	0.622187	0.105282	5.9097	3.4273e-09	7.59005e-08
Napsa	259.133	-1.23053	0.208229	-5.9095	3.43149e-09	7.59005e-08
Mrps35	584.714	0.764342	0.129419	5.90595	3.50628e-09	7.74535e-08
Tinagl1	504.115	1.12772	0.190997	5.9044	3.53943e-09	7.8084e-08
Rgs3	446.777	1.58703	0.268838	5.90327	3.56359e-09	7.85148e-08
Klf16	171.363	-1.54621	0.262305	-5.8947	3.75368e-09	8.25956e-08
Slc10a7	322.635	0.963304	0.163475	5.89269	3.79966e-09	8.3499e-08
Cln6	230.037	-0.933956	0.15858	-5.88951	3.8734e-09	8.50092e-08
Tdrd15	103.802	-1.53253	0.260304	-5.88747	3.92144e-09	8.5952e-08
Rnf8	504.358	0.862354	0.146524	5.88542	3.97054e-09	8.69159e-08
Tmem229b	121.661	-1.10561	0.187862	-5.88519	3.97595e-09	8.6922e-08
Gpr155	403.628	0.853763	0.145172	5.88104	4.07691e-09	8.90143e-08
Dnajc3	3945.78	0.93229	0.158534	5.88071	4.08502e-09	8.90765e-08
Cyp4f1	11487.4	0.964561	0.164056	5.87947	4.11573e-09	8.96309e-08
March3	75.8011	-1.31125	0.223087	-5.87776	4.15857e-09	9.04475e-08
Rab19	17.7875	-2.62972	0.447489	-5.87661	4.18757e-09	9.09616e-08
Aprt	790.695	-0.702456	0.119556	-5.87552	4.21528e-09	9.14463e-08
AABR07021988.1	2337.98	0.694345	0.118185	5.87505	4.22703e-09	9.1467e-08
RGD1562310	276.107	-1.36584	0.23248	-5.87509	4.22617e-09	9.1467e-08
Srrm1	1544.3	0.739841	0.125999	5.87179	4.31108e-09	9.3048e-08
Sik3	1572.38	0.480608	0.0818474	5.872	4.30569e-09	9.3048e-08
Prdm10	149.836	1.15856	0.19734	5.87087	4.33521e-09	9.34497e-08
Mknk2	2987	-0.769464	0.131092	-5.86967	4.36676e-09	9.40101e-08
Zfp612	219.405	-1.00634	0.171469	-5.86891	4.38683e-09	9.43223e-08
Rfx5	291.428	-0.750658	0.127952	-5.86674	4.44441e-09	9.54394e-08
AABR07056638.1	85.6977	1.39766	0.238306	5.86499	4.49171e-09	9.6333e-08
Cnot2	521.712	0.702387	0.119787	5.86363	4.52864e-09	9.70023e-08
Mrpl41	622.418	0.891262	0.152176	5.85677	4.71955e-09	1.00964e-07
Hspe1	1653.78	1.01011	0.172536	5.85449	4.78483e-09	1.02231e-07
Hibch	418.12	-0.767538	0.131147	-5.8525	4.8425e-09	1.03333e-07
Nfyc	997.827	0.681625	0.116479	5.85193	4.85899e-09	1.03554e-07
Tspan12	1638.83	0.789854	0.134995	5.85097	4.88723e-09	1.03926e-07
Hibadh	4548.14	0.942353	0.161061	5.85092	4.8887e-09	1.03926e-07
Slc25a23	2791.66	-0.807629	0.138053	-5.85014	4.91169e-09	1.04284e-07
Sema4a	494.006	-0.87923	0.150323	-5.84894	4.94709e-09	1.04904e-07
Scamp5	267.911	-0.921222	0.157541	-5.84749	4.99031e-09	1.05689e-07
AABR07068044.2	31.7474	3.15778	0.540145	5.84618	5.0298e-09	1.06392e-07
AABR07039448.1	85.6446	-1.5524	0.266041	-5.83518	5.37338e-09	1.13518e-07
Slc35d2	461.127	-1.19689	0.205196	-5.83292	5.44665e-09	1.14823e-07
Vsir	319.414	-0.932461	0.159864	-5.83285	5.44873e-09	1.14823e-07
Rps16	6066.74	-0.614452	0.10535	-5.83246	5.46146e-09	1.14949e-07
Mapk8ip3	529.425	-0.894028	0.153353	-5.82986	5.54746e-09	1.16614e-07
Upp1	108.929	-1.69506	0.290827	-5.8284	5.59608e-09	1.17345e-07
Mt-nd1	302794	1.10606	0.189764	5.8286	5.58957e-09	1.17345e-07
Sec62	2271.36	0.626858	0.107605	5.82555	5.69261e-09	1.19003e-07
Cyb5r4	433.605	-0.876582	0.150475	-5.82544	5.69623e-09	1.19003e-07
Gucy1b2	869.183	1.29934	0.22304	5.8256	5.69078e-09	1.19003e-07
Nipa1	37.5067	-1.8889	0.324315	-5.82427	5.73616e-09	1.19689e-07
Gpm6a	325.47	-1.4978	0.257203	-5.8234	5.76623e-09	1.20169e-07
RGD1304694	756.044	-0.780186	0.133985	-5.82292	5.78266e-09	1.20363e-07
Litaf	2584.94	0.498751	0.0856722	5.82162	5.82795e-09	1.21157e-07
Mcc	70.1646	1.50271	0.258408	5.81527	6.05378e-09	1.25698e-07
Odc1	1194.71	-0.859021	0.14777	-5.81322	6.12834e-09	1.2709e-07
Glcci1	204.348	0.866762	0.149113	5.81279	6.14415e-09	1.27262e-07
Rps13	476.558	-0.682558	0.117474	-5.81029	6.23656e-09	1.29018e-07
Ltbp3	260.359	-1.40345	0.24162	-5.80848	6.30428e-09	1.3026e-07
Ncoa2	388.802	0.849522	0.146337	5.80526	6.4268e-09	1.3263e-07
Prkci	751.486	0.632503	0.109002	5.80266	6.52698e-09	1.34534e-07
Gem	33.2307	-2.54745	0.439148	-5.8009	6.59597e-09	1.3579e-07
Spink1	178.931	-8.01473	1.38177	-5.80033	6.61852e-09	1.36089e-07
AC127189.1	24.87	-2.37581	0.409864	-5.79658	6.76799e-09	1.38994e-07
Cnot4	331.87	0.841127	0.145157	5.7946	6.84852e-09	1.40308e-07
AABR07064415.1	384.847	1.05576	0.182192	5.79475	6.8422e-09	1.40308e-07
Cd4	643.072	-0.756942	0.130823	-5.78599	7.20856e-09	1.47506e-07
Zfp318	468.43	0.850537	0.147015	5.78538	7.23474e-09	1.47863e-07
Prtg	13.8002	7.39808	1.27934	5.78272	7.35023e-09	1.50042e-07
Nfil3	1275.52	0.985185	0.170468	5.77928	7.50194e-09	1.52955e-07
Sncg	102.327	-2.51997	0.436118	-5.77818	7.55116e-09	1.53773e-07
Lst1	127.333	-1.26424	0.218981	-5.7733	7.77341e-09	1.58109e-07
Nudc	281.769	0.970374	0.168159	5.77058	7.90012e-09	1.6011e-07
Kcnk1	26.0448	-3.30939	0.573476	-5.77076	7.89158e-09	1.6011e-07
Mt-nd6	67395.9	1.40888	0.244143	5.77071	7.89375e-09	1.6011e-07
Csf1r	2152.15	-0.841546	0.145887	-5.76848	7.9992e-09	1.61924e-07
Acad8	377.5	-0.7424	0.12874	-5.76666	8.08557e-09	1.63477e-07
Slc22a23	4091.24	0.943647	0.163648	5.76632	8.10205e-09	1.63615e-07
Ybx1-ps3	99.2982	-2.04774	0.355292	-5.76355	8.23606e-09	1.66123e-07
Cldn3	2043.48	-1.03197	0.179196	-5.7589	8.46651e-09	1.70569e-07
Ifitm6	16.0687	2.2176	0.385092	5.75863	8.47982e-09	1.70634e-07
Dpp7	550.515	-0.749171	0.130155	-5.75601	8.61253e-09	1.73099e-07
Tyrobp	707.699	-0.794551	0.138049	-5.75555	8.6359e-09	1.73233e-07
Tmem11	425.346	0.74257	0.12902	5.75548	8.63968e-09	1.73233e-07
Tfcp2l1	163.197	-1.76958	0.307519	-5.75439	8.69541e-09	1.74145e-07
Srek1	720.567	0.895778	0.155699	5.75327	8.75353e-09	1.75102e-07
Lrfn3	19.0741	2.57048	0.446884	5.75201	8.81905e-09	1.76204e-07
Slu7	466.091	0.660064	0.114779	5.75076	8.88409e-09	1.77295e-07
Phldb1	291.6	-1.12952	0.196539	-5.74702	9.0832e-09	1.81055e-07
Golt1b	215.004	-0.775879	0.135102	-5.74291	9.30652e-09	1.85288e-07
Faf2	1080.37	0.518313	0.0902592	5.7425	9.32883e-09	1.85515e-07
Trim32	144.372	-0.992605	0.173025	-5.73679	9.64883e-09	1.91653e-07
Aox1	4798.66	2.43323	0.424313	5.73451	9.77921e-09	1.93789e-07
Adam11	1487.71	-2.70674	0.472004	-5.73456	9.77639e-09	1.93789e-07
P3h1	654.082	-0.670815	0.117016	-5.73268	9.88576e-09	1.95671e-07
Acacb	2178.37	-1.02446	0.178717	-5.73232	9.90643e-09	1.95851e-07
Tmem128	314.046	-0.989352	0.172622	-5.73131	9.96589e-09	1.96797e-07
Rbm8a	777.361	0.800064	0.139622	5.7302	1.00314e-08	1.97861e-07
Itsn2	769.495	0.51217	0.0894098	5.72834	1.01421e-08	1.99811e-07
Cnot3	491.618	0.856588	0.149668	5.72327	1.04496e-08	2.0563e-07
Asxl2	161.176	1.01088	0.176636	5.72296	1.04687e-08	2.05767e-07
Dcaf8	1210.26	0.571727	0.0999318	5.72117	1.05792e-08	2.07553e-07
AABR07033745.1	21.8559	6.3339	1.10711	5.72109	1.05841e-08	2.07553e-07
Stard5	607.865	0.794663	0.138983	5.71769	1.0798e-08	2.11504e-07
Nop10	926.312	0.623889	0.109161	5.71531	1.09505e-08	2.14242e-07
Cox14	313.501	-0.82889	0.145044	-5.71477	1.09854e-08	2.14678e-07
Tmem208	588.936	-0.635006	0.111121	-5.71457	1.09984e-08	2.14685e-07
Eif2ak2	584.356	0.870218	0.152296	5.714	1.10348e-08	2.15148e-07
St3gal5	733.623	-0.687632	0.120359	-5.71317	1.10888e-08	2.1595e-07
Pofut1	505.011	0.780755	0.136677	5.71241	1.11388e-08	2.16675e-07
Kif21a	262.258	1.21962	0.213538	5.71148	1.11998e-08	2.17612e-07
Psmb4	1944.09	-0.795549	0.139404	-5.70679	1.15129e-08	2.23202e-07
Snx5	1543.44	-0.545945	0.0956662	-5.70677	1.15138e-08	2.23202e-07
[truncated: 5,613 more rows]

## Sheet: SD_vs_PCK
symbol	baseMean	log2FoldChange	lfcSE	stat	pvalue	padj
[truncated: 1,287 more rows]
