# Supplementary material
Source: MDPI journal article supplement (https://www.mdpi.com/2673-4389/3/3/25)
Supplement: s1 [file s1 › Khare et al Supplementary material.pdf]

## Supplementary figure S1

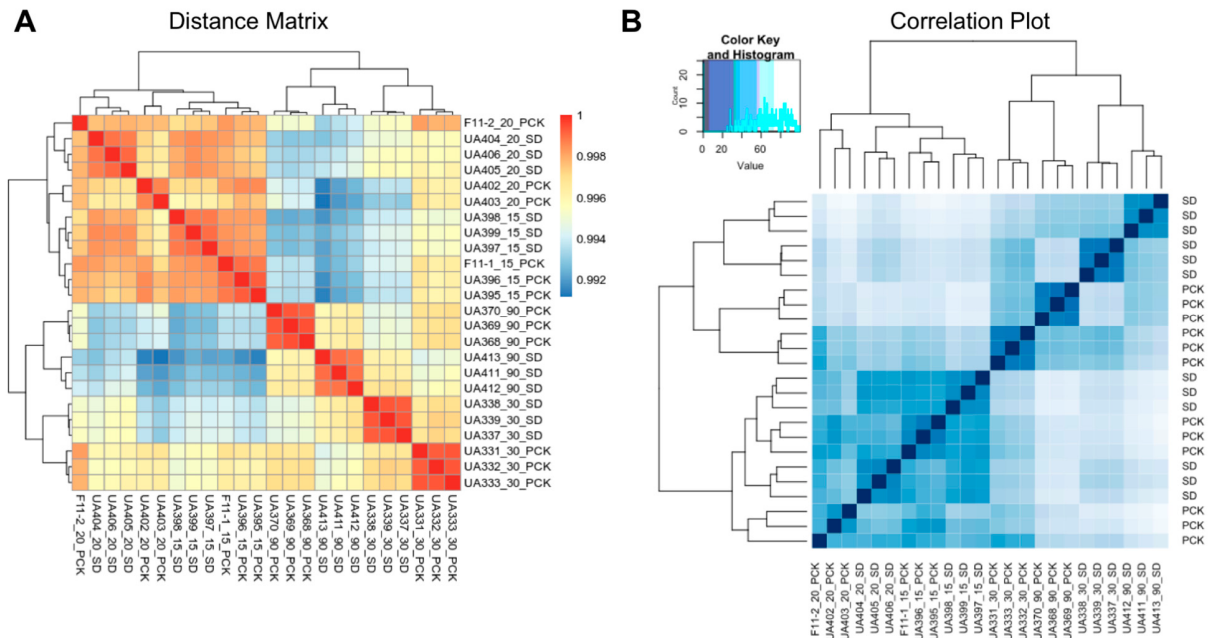

**Supplementary Figure S1. Data quality analysis of RNAseq data.** (A) Distance matrix plot and (B) Correlation plot show that biological replicates in each group cluster closer together indicating good samples quality, RNAseq analysis and overall good data quality.
